# Supplementary material for: Divergent reaction pathways in gold-catalyzed cycloisomerization of 1,5-enynes containing a cyclopropane ring: dramatic ortho substituent and temperature effects
Source: Chem Sci. 2016 Mar 4;7(7):4318–28. doi: 10.1039/c6sc00058d (PMC6013813; doi:10.1039/c6sc00058d)
Supplement: SC-007-C6SC00058D-s001 [file SC-007-C6SC00058D-s001.pdf]

## Supporting Information

# Divergent Reaction Pathways in Gold Catalyzed Cycloisomerization of 1,5-enynes Containing a Cyclopropane: Dramatic Ortho Substituent and Temperature Effects

*Gen-Qiang Chen, Wei Fang, Yin Wei,\* Xiang-Ying Tang,\* and Min Shi\**

State Key Laboratory of Organometallic Chemistry,

Shanghai Institute of Organic Chemistry,

Chinese Academy of Sciences, 345 Lingling Road, Shanghai, 200032, China.

[weiyin@sioc.ac.cn](mailto:weiyin@sioc.ac.cn), [siocxiangying@sioc.ac.cn](mailto:siocxiangying@sioc.ac.cn), [mshi@sioc.ac.cn](mailto:mshi@sioc.ac.cn). Fax 86-21-64166128

## CONTENTS

|                                                                                                                   |           |
|-------------------------------------------------------------------------------------------------------------------|-----------|
| 1. General Remarks.....                                                                                           | S2        |
| 2. General or Representative Reaction Procedure.....                                                              | S3-S7     |
| 3. Procedures for the Synthesis of the Deuterated Compounds.....                                                  | S8-S11    |
| 4. Optimization of the Reaction Conditions.....                                                                   | S12-S13   |
| 5. Spectroscopic Data.....                                                                                        | S14-S137  |
| 6. Evidences for the Existence of Rotamer.....                                                                    | S138      |
| 7. <sup>1</sup> H and <sup>13</sup> C NMR Spectra of the Compound <b>7j</b> .....                                 | S139      |
| 8. <sup>1</sup> H NMR Spectra of the Deuterated Compounds.....                                                    | S140-S146 |
| 9. Crystallographic Information.....                                                                              | S147-S149 |
| 10. 2D-NMR Data of Compounds <b>3a</b> , <b>4b</b> , <b>5a</b> and <b>6a</b> .....                                | S150-165  |
| 11. Three possible routes for the formation of product <b>3</b> from <b>4</b> .....                               | S166      |
| 12. Another mechanism for the formation of products <b>5b</b> and <b>6b</b> through intermediate <b>4b'</b> ..... | S167      |
| 13. Computational Details.....                                                                                    | S168-169  |
| 14. Archive Entries.....                                                                                          | S170-220  |
| 15. Reference.....                                                                                                | S221      |

**1. General Remarks.**  $^1\text{H}$  and  $^{13}\text{C}$  NMR spectra were recorded at the 300 and 75 MHz or the 400 and 100 MHz, respectively. Mass and HRMS spectra were recorded by EI or ESI method. Organic solvents used were dried by standard methods when necessary. 1,2-Dichloroethane and dichloromethane were distilled from  $\text{CaH}_2$  under argon (Ar) atmosphere. Commercially obtained reagents were used without further purification. Flash column chromatography was performed using 300-400 mesh silica gel. For thin-layer chromatography (TLC), silica gel plates (Huanghai GF254) were used.

## 2. General or Representative Reaction Procedure.

Representative procedures for the preparation of substrates:

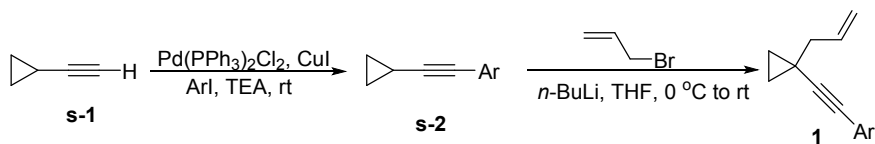

Scheme S1

The substrate **1a** was synthesized according to Scheme S1. The compound **s-2** was synthesized according to the previously reported procedure.<sup>[1]</sup>

Synthesis of substrate **1a**: To a 100 mL flame and vacuum dried flask was added cyclopropylphenylacetylene **s-2** (4.33 g, 31.16 mmol), then the flask was evacuated and backfilled with Ar and then  $n\text{-BuLi}$  (2.5 M, 15 mL, 37.5 mmol) was added slowly at  $0\text{ }^\circ\text{C}$ . The reaction mixture was warmed to  $\text{rt}$  gradually and allowed to be stirred at  $\text{rt}$  for 1 h, and then allyl bromide (3.0 mL, 37.4 mmol) was added slowly at  $0\text{ }^\circ\text{C}$ . The reaction mixture was stirred overnight. After that, the reaction was quenched with water, and then extracted with ethyl acetate (30 mL\*3). The combined organic phase was dried over  $\text{Na}_2\text{SO}_4$  (anhydrous) and evaporated under reduced pressure. The crude product was purified by column chromatography using PE as an eluent. The product was afforded as a colorless oil (3.12 g, yield = 58%).

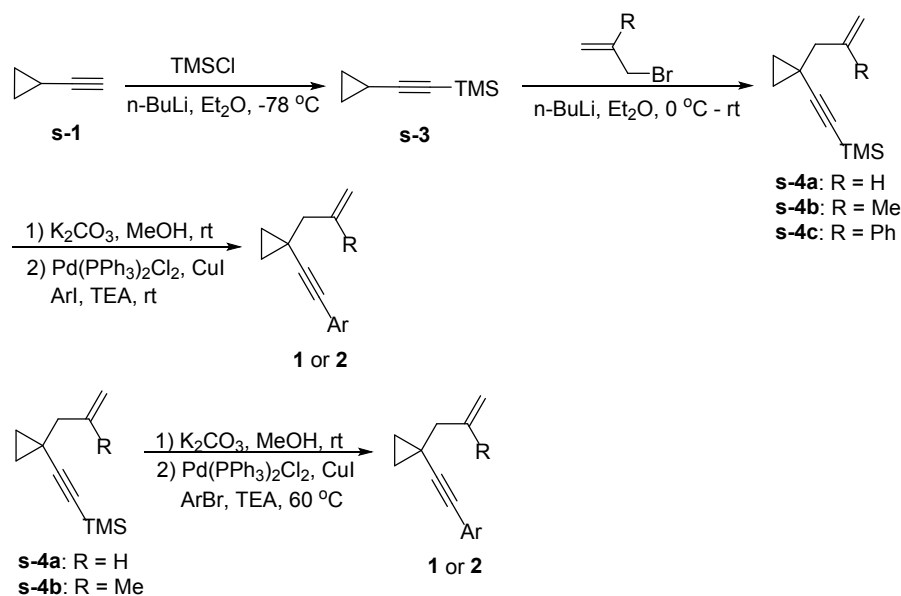

Scheme S2

The substrates **1b**, **1c**, **1d**, **1e**, **1f**, **1g**, **1h**, **1i**, **1j**, **1k**, **1l**, **1m**, **1n**, **1o**, **1p**, **2a**, **2b**, **2c**, **2d**, **2e**, **2f**, **2g**, **2h**, **2i**, **2j**, **2k**, **2l**, **2m** and **2n** were synthesized according to Scheme S2. The corresponding iodide was synthesized according to the previously reported procedures.<sup>[2]</sup>

The compound **s-3** was synthesized according to the previously reported procedure:<sup>[3]</sup> To a 500 mL flame and vacuum dried three-neck flask was added compound **s-1** (20.3 mL, 240 mmol) and 100 mL THF under Ar, then *n*-BuLi (2.5 M, 97 mL, 240 mmol) was added slowly at -78 °C. After the addition was complete, the reaction mixture was allowed to stir at -78 °C for 2 h. TMSCl (33 mL, 240 mmol) was added to the flask slowly at -78 °C. The reaction mixture was allowed to stir at -78 °C for 2 h, and then warmed to rt gradually. After 5 h, the reaction was quenched with water. The reaction mixture was extracted with Et<sub>2</sub>O, and the combined organic phase was dried over anhydrous sodium sulfate. The crude product was purified by vacuum distillation, and the product **s-3** (100 mbar, 80 °C fraction) was obtained as a colorless oil (23.0 g, yield = 69%).

Synthesis of compound **s-4**: To a 250 mL flame and vacuum dried three-neck flask was added compound **s-3** (21.36 g, 154.5 mmol) and 100 mL Et<sub>2</sub>O under Ar, then *n*-BuLi (1.6 M, 100 mL, 160 mmol). After the addition was complete, the reaction mixture was allowed to stir at rt for 14 h. Allyl bromide (14.0 mL, 160 mmol) was added slowly to the reaction mixture to maintain gentle reflux. After the addition was complete, the reaction mixture was warmed to rt. The reaction was quenched with water and the reaction mixture was extracted with Et<sub>2</sub>O, and the combined organic phase was dried over anhydrous sodium sulfate. The product **s-4** was purified by vacuum distillation (50 mbar, 90-100 °C) and the desired product was afforded as a colorless oil (17.2 g, yield = 63%).

Synthesis of compound **1f**: To a 50 mL flask was added **s-4a** (850 mg, 4.5 mmol) and  $K_2CO_3$  (700 mg, 5.0 mmol) and 2.5 mL methanol, the reaction mixture was allowed to stir at rt for 2 hours. Then *p*-Ph-PhI (1.12 g, 4.0 mmol) and 10 mL TEA (triethylamine) were added into the reaction system, respectively. The reaction mixture was solidified by liquid  $N_2$ , and then evacuated and backfilled with Ar for 3 times.  $Pd(PPh_3)_2Cl_2$  (70 mg, 0.01 mmol) and CuI (38 mg, 0.02 mmol) were added under Ar. The reaction mixture was allowed to stir at rt overnight. The product was purified by column chromatography using PE as an eluent. The corresponding product **1f** was afforded as a colorless oil (1.053 g, yield = 91%).

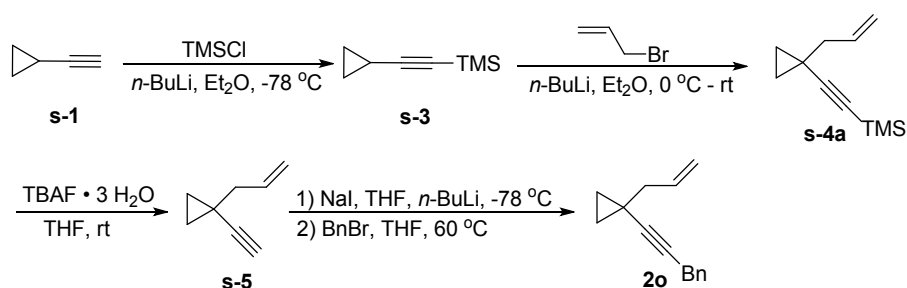

Scheme S3

The substrate **2o** was synthesized according to Scheme S3.

Synthesis of compound **s-5**: To a 50 mL flask was added **s-4a** (5.35 g, 30 mmol), THF (20 mL) and TBAF $\cdot$ 3 $H_2O$  (11.025 g, 35 mmol), the reaction mixture was allowed to stir at rt overnight. The reaction mixture was filtered through a short pad of silica gel using *n*-pentane as an eluent. The product was purified by distillation under ambient pressure, and the  $60\text{ }^{\circ}C$  fraction was collected as mixtures of THF, DCM and **s-5** (4.315 g, yield = 72%, determined by  $^1H$  NMR). The mixture was used in the next step without further purification.

Synthesis of compound **2o**: To a 100 mL flask was added NaI (1.09 g), then the flask was flame and vacuum dried and **s-5** (mixtures of DCM and THF, 1.5 g, 7.5 mmol) was added and then THF (20 mL) and  $n-BuLi$  (2.5 M, 3.25 mL, 8.0 mmol) were added at  $-78\text{ }^{\circ}C$ . The reaction mixture was allowed to stir at  $-78\text{ }^{\circ}C$  for 2.5 h. BnBr (1.10 mL, 9.0 mmol) was added and the reaction mixture was allowed to stir at  $60\text{ }^{\circ}C$  with an oil bath overnight. The product was purified by column chromatography using PE as an eluent. Product **2o** was afforded as a colorless oil (0.863 g, yield = 59%).

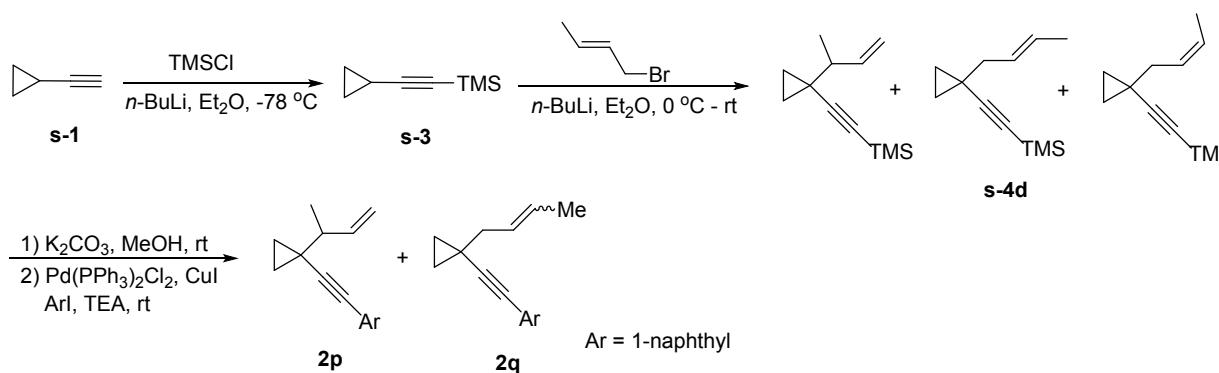

**Scheme S4**

The substrates **2p** and **2q** were synthesized according to Scheme S4.

**Synthesis of compound s-4d:** To a 250 mL flame and vacuum dried three neck flask was added **s-3** (16.22 g, 118 mmol) and Et<sub>2</sub>O (50 mL), then *n*-BuLi (50 mL, 125 mmol) was added at 0 °C. The reaction mixture was warmed to rt and allowed to stir at rt overnight. (E)-1-bromobut-2-ene (19 g, 125 mmol) was added slowly at 0 °C. The reaction was quenched with H<sub>2</sub>O and the crude product was purified by vacuum distillation. The product **s-4d** (50 mbar, 100-120 °C fraction) was afforded as a colorless oil (10.053 g, yield = 44%, mixtures of three compounds).

**Synthesis of compounds 2p and 2q:** To a 50 mL flask was added **s-4d** (1.00 g, 5 mmol) and K<sub>2</sub>CO<sub>3</sub> (1.00 g, 7.2 mmol) and 2.5 mL methanol, the reaction mixture was allowed to stir at rt for 2 hours. Then 2-iodo-naphthalene (1.27 g, 5.0 mmol) and 10 mL TEA (triethylamine) were added. The reaction mixture was solidified by liquid N<sub>2</sub>, then evacuated and backfilled with Ar for 3 times. Pd(PPh<sub>3</sub>)<sub>2</sub>Cl<sub>2</sub> (70 mg, 0.01 mmol) and CuI (38 mg, 0.02 mmol) were added under Ar. The reaction mixture was allowed to stir at rt overnight. The product was purified by column chromatography using PE as an eluent. The product was afforded as a colorless oil (**2p**, 0.103 g, yield = 8%; **2q**, 0.563 g, yield = 46%).

### Representative procedure for the gold(I) catalyzed cascade reactions of substrates 1:

To a 25 mL flame and vacuum dried Schlenk tube was added substrate **1a** (37 mg, 0.2 mmol), the reaction tube was evacuated and backfilled with Ar. [JohnPhosAu·MeCN]SbF<sub>6</sub> (3.5 mg, 3 mol%) was dissolved in 2.0 mL DCM, and the air was bubbled out with Ar. Then the catalyst solution was added to the Schlenk tube at 0 °C. The reaction mixture was allowed to stir at 0 °C and the reaction

was quenched with DMS (dimethyl sulfide) when the reaction was complete. The product was purified by column chromatography using PE as an eluent. The product **3a** was afforded as a colorless oil (34 mg, yield = 92%).

**Representative procedure for the gold(I) catalyzed cascade reactions of substrates 2 leading to 4:**

To a 25 mL flame and vacuum dried Schlenk tube was added substrate **2a** (57 mg, 0.2 mmol) and 2.0 mL dry DCM under Ar and the reaction was allowed to stirred at -30 °C for 30 min. Then IPrAuNTf<sub>2</sub> (4.0 mg, 3.0 mol%) was added under Ar. The reaction mixture was allowed to stir at -30 °C for 8 h. The reaction was quenched with DMS (dimethyl sulfide). The product was purified by column chromatography using PE as an eluent. The product **4a** was afforded as a white solid (42 mg, yield = 75%).

**Representative procedure for the gold(I) catalyzed cascade reactions of substrates 2 leading to 5:**

To a 25 mL flame and vacuum dried Schlenk tube was added substrate **2a** (57 mg, 0.2 mmol) and 2.0 mL dry DCM under Ar and the reaction was allowed to stirred at -0 °C for 30 min. Then [JohnPhosAu·MeCN]SbF<sub>6</sub> (3.5 mg, 3.0 mol%) was added under Ar. The reaction mixture was allowed to stir at 0 °C for 12 h. The reaction was quenched with DMS (dimethyl sulfide). The product was purified by column chromatography using PE as an eluent. The product **5a** was afforded as a white solid (47 mg, yield = 84%).

**Representative procedure for the gold(I) catalyzed cascade reactions of substrates 2 leading to 6:**

To a 25 mL flame and vacuum dried Schlenk tube was added substrate **2a** (57 mg, 0.2 mmol) and [JohnPhosAu·MeCN]SbF<sub>6</sub> (3.5 mg, 3.0 mol%), then the reaction tube was evacuated and backfilled with Ar. 2.0 mL dry DCE was added to the reaction tube, and the reaction mixture was allowed to stir at 60 °C with an oil bath for 12 h. The product was purified by column chromatography using PE as an eluent. The product **6a** was afforded as a white solid (54 mg, yield = 95%).

### 3. Procedures for the Synthesis of the Deuterated Compounds.

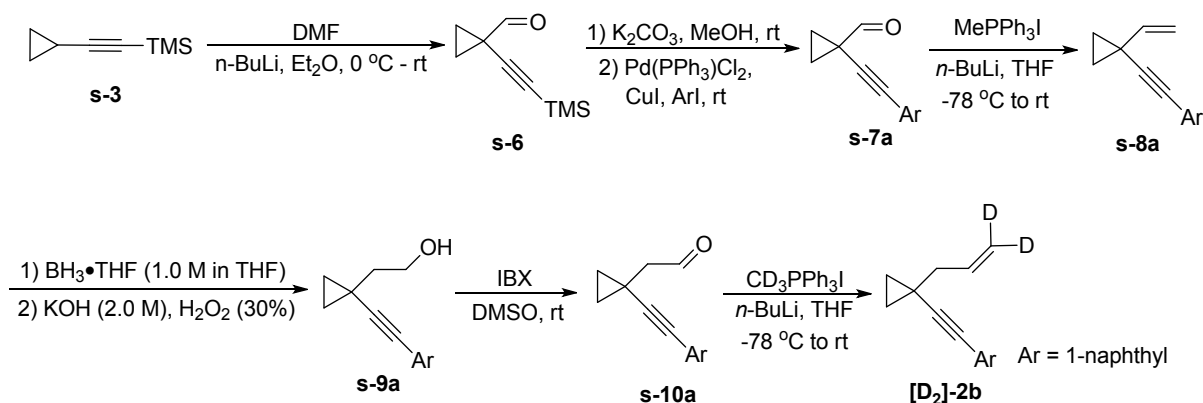

Scheme S5

The deuterated compound **[D<sub>2</sub>]-2b** was synthesized according to Scheme S5.

Compound **s-7a** was synthesized according to the previously reported procedure:<sup>[1]</sup> To a 100 mL flask was added **s-6** (1.66 g, 10 mmol), K<sub>2</sub>CO<sub>3</sub> (1.38 g, 10 mmol) and 4 mL MeOH, the reaction mixture was allowed to stir at rt for 1 h. 1-iodo-naphthalene (2.54 g, 10 mmol) and 15 mL TEA (triethylamine) were added. The reaction mixture was solidified by liquid nitrogen, then evacuated and backfilled with Ar for 3 times. Pd(PPh<sub>3</sub>)<sub>2</sub>Cl<sub>2</sub> (100 mg, 0.014 mmol) and CuI (59 mg, 0.031 mmol) were added under Ar. The reaction mixture was allowed to stir at rt overnight. The compound **s-7a** was purified by column chromatography using PE as an eluent (1.418 g, yield = 64%).

Synthesis of compound **s-8a**: To a 100 mL flame and vacuum dried flask was added MePPh<sub>3</sub>I (4.04 g, 10 mmol), then the flask was evacuated and backfilled with Ar. THF (20 mL) was added, and then *n*-BuLi (2.5 M, 4 mL, 10 mmol) was added slowly at -78 °C. After 20 min., **s-7a** (1.10 g) dissolved in 10 mL THF was added slowly. The reaction mixture was warmed to rt gradually, and allowed to stir at rt for 6 h. The product was purified by column chromatography using PE as an eluent. The compound **s-8a** was afforded as a colorless oil (880 mg, yield = 81%).

Synthesis of compound **s-9a**: To a 100 mL flame and vacuum dried flask (containing 218 mg **s-8a**) was added THF (15 mL), then BH<sub>3</sub> (1.0 M in THF, ) was added slowly at 0 °C. After 30 min., NaOH (2.0 M, 2.5 mL) was added. After 5 min., H<sub>2</sub>O<sub>2</sub> (30%, 2.5 mL) was added. The reaction was quenched with sodium thiosulfate. The product was purified by column chromatography (eluent: PE/EA = 4/1). The compound **s-9a** was afforded as a colorless oil (108 mg, yield = 46%).

Synthesis of compound **s-10a**: To a 50 mL flask was added **s-9a** (914 mg, 3.87 mmol) and 10 mL DMSO, then 1.4 g IBX was added. The reaction mixture was allowed to stir at rt overnight. The product was purified by column chromatography (eluent: PE/EA = 20/1). The product was afforded as a colorless oil (624 mg, yield = 69%).

Synthesis of compound **[D<sub>2</sub>]-2b**: To a 100 mL flame and vacuum dried flask was added CD<sub>3</sub>PPh<sub>3</sub>I (2.04 g, 5 mmol), then the flask was evacuated and backfilled with Ar. THF (20 mL) was added, and then *n*-BuLi (2.5 M, 2.0 mL, 5 mmol) was added slowly at -78 °C. After 20 min., **s-10a** (624 mg, 2.66 mmol) dissolved in 10 mL dry THF was added to the flask. The reaction mixture was allowed to warm to rt gradually and stirred at rt for 6 hours. The product **[D<sub>2</sub>]-2b** was purified by column chromatography using PE as an eluent. The product was afforded as colorless oil (578 mg, yield = 92%).

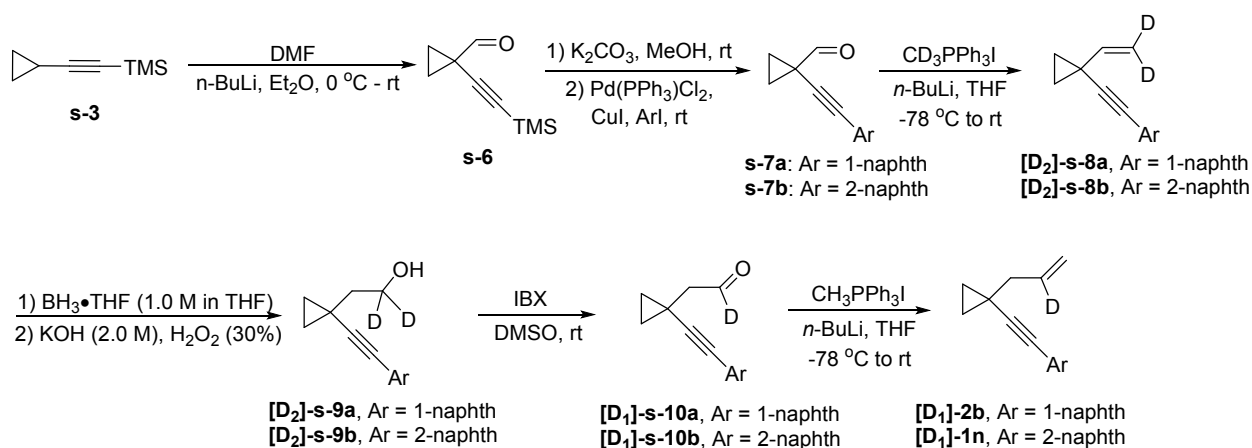

Scheme S6

The deuterium labeling compounds **[D<sub>1</sub>]-2b** and **[D<sub>1</sub>]-1n** was synthesized according to Scheme S6. The synthetic route was very similar as that of compound **[D<sub>2</sub>]-2b**.

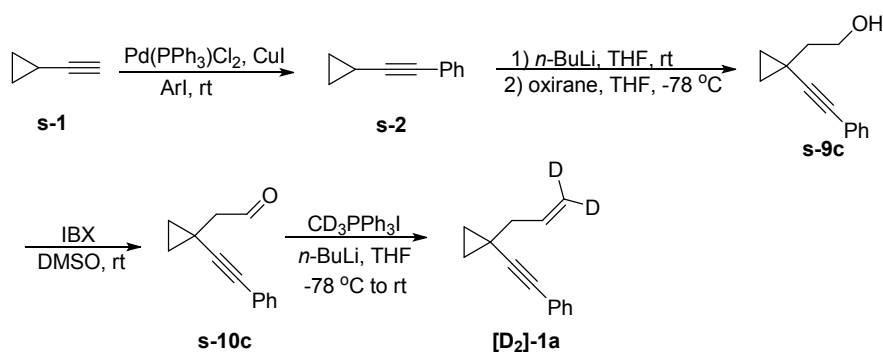

Scheme S7

The deuterium labeling compound **[D<sub>2</sub>]-1a** was synthesized according to Scheme S7.

Synthesis of compound **s-9c**: To a 100 mL flame and vacuum dried flask was added compound **s-2** (7.11 g, 50 mmol), then the flask was evacuated and backfilled with Ar. THF (40 mL) was added and then *n*-BuLi (2.5 M, 20.0 mL, 50 mmol) was added slowly at -78 °C. The reaction mixture was allowed to stir at rt for 1.0 hour, then cooled to -78 °C. Epoxyethane dissolved in THF was added slowly until the color of reaction mixture disappeared. After 20 min., the reaction was quenched with saturated NH<sub>4</sub>Cl solution. The product was purified by silica gel column chromatography (eluent: PE/EA = 10/1 to 4/1). The product was afforded as a colorless oil (7.018 g, yield = 75%).

Synthesis of compound **s-10c**: To a 100 mL flask was added compound **s-9c** (3.969 g, 21.3 mmol), then 7.16 g IBX was added. The reaction mixture was allowed to stir at rt overnight. The product was purified by silica gel column chromatography (eluent: PE/EA = 30/1). The product was afforded as a colorless oil (3.625 g, yield = 92%).

Synthesis of compound **[D<sub>2</sub>]-1a**: To a 50 mL flame and vacuum dried flask was added CD<sub>3</sub>PPh<sub>3</sub>I (4.5 g, 11 mmol), then the flask was evacuated and backfilled with Ar. THF (20 mL) was added, and then *n*-BuLi (2.5 M, 4.4.0 mL, 11 mmol) was added slowly at -78 °C. After 20 min., **s-10c** (1.84 g, 10 mmol) dissolved in 10 mL dry THF was added to the flask. The reaction mixture was allowed to warm to rt gradually and stirred at rt for 6 hours. The product was purified by silica gel column chromatography using PE as an eluent. The product was afforded as a colorless oil (1.5 g, yield = 82%).

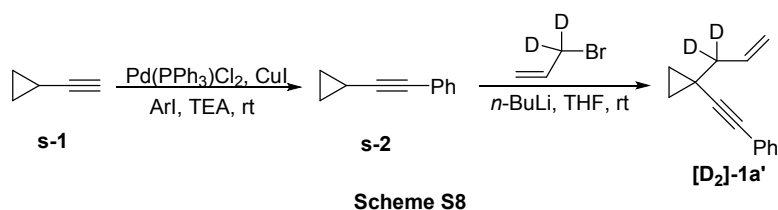

The deuterium labeling compound **[D<sub>2</sub>]-1a'** was synthesized according to Scheme S8. The deuterated allyl bromide was prepared according to the previously reported procedure.<sup>[4]</sup>

Synthesis of compound **[D<sub>2</sub>]-1a'**: To a 100 L flame and vacuum dried flask was added compound **s-2** (1.42 g, 10 mmol) and 20 mL THF under Ar, then *n*-BuLi (2.5M, 4.5 mL, 11.25 mmol) was added slowly at rt. The deuterated allyl bromide (Et<sub>2</sub>O solution) was added slowly until the brown color of the reaction mixture disappeared. Compound **[D<sub>2</sub>]-1a'** and the compound **s-2** can not be separated by silica gel column chromatography. The product was purified by GPC (gel permeation chromatography). The product was afforded as a colorless oil (0.105 g, yield = 6%).

#### 4. Optimization of the Reaction Conditions.

**Table SI-1.** Optimization of the reaction conditions for the gold catalyzed cycloisomerization of **1a**.

**1a** Catalyst temperature, solvent, 12 h **3a**

| entry          | catalyst                                                                                                       | solvent            | temperature (°C) | yield (%)             |
|----------------|----------------------------------------------------------------------------------------------------------------|--------------------|------------------|-----------------------|
| 1              | PPh <sub>3</sub> AuCl/AgSbF <sub>6</sub> (5 mol%)                                                              | DCM                | rt               | 82 <sup>a</sup>       |
| 2 <sup>b</sup> | PPh <sub>3</sub> AuCl/AgSbF <sub>6</sub> (5 mol%)                                                              | DCE                | rt               | 27 <sup>a</sup>       |
| 3 <sup>b</sup> | PPh <sub>3</sub> AuCl/AgSbF <sub>6</sub> (5 mol%)                                                              | CH <sub>3</sub> CN | rt               | N.R.                  |
| 4              | [JohnPhosAu(MeCN)]SbF <sub>6</sub> (3 mol%)                                                                    | DCE                | rt               | 81 <sup>a</sup>       |
| 5              | [JohnPhosAu(MeCN)]SbF <sub>6</sub> (3 mol%)                                                                    | DCM                | -20              | 35 <sup>c,e</sup>     |
| 6 <sup>d</sup> | <b>[JohnPhosAu(MeCN)]SbF<sub>6</sub> (3 mol%)</b>                                                              | <b>DCM</b>         | <b>0</b>         | <b>92<sup>e</sup></b> |
| 7              | [JohnPhosAu(MeCN)]SbF <sub>6</sub> (3 mol%)                                                                    | DCE                | 60               | 61 <sup>a</sup>       |
| 8              | [P( <i>p</i> -F-C <sub>6</sub> H <sub>4</sub> ) <sub>3</sub> Au(MeCN)]SbF <sub>6</sub> (3 mol%)                | DCM                | 0                | 72 <sup>a</sup>       |
| 9              | [P( <i>p</i> -CF <sub>3</sub> -C <sub>6</sub> H <sub>4</sub> ) <sub>3</sub> Au(MeCN)]SbF <sub>6</sub> (3 mol%) | DCM                | 0                | 73 <sup>a</sup>       |
| 10             | [P(OAr) <sub>3</sub> Au(MeCN)]SbF <sub>6</sub> (3 mol%)                                                        | DCM                | 0                | N.R.                  |
| 11             | [P( <i>t</i> -Bu) <sub>3</sub> Au(MeCN)]SbF <sub>6</sub> (3 mol%)                                              | DCM                | 0                | 36 <sup>a</sup>       |
| 12             | [JackiePhosAu(MeCN)]SbF <sub>6</sub> (3 mol%)                                                                  | DCM                | 0                | N.R.                  |
| 13             | [XPhosAu(MeCN)]SbF <sub>6</sub> (3 mol%)                                                                       | DCM                | 0                | 22 <sup>a</sup>       |
| 14             | [IPrAu(MeCN)]SbF <sub>6</sub> (3 mol%)                                                                         | DCM                | 0                | 21 <sup>a</sup>       |

<sup>a</sup> NMR yield. The product contains unidentified byproduct. <sup>b</sup> The reaction was conducted under O<sub>2</sub> atmosphere. <sup>c</sup> Compound **1a** can be recovered quantitatively. <sup>d</sup> The solvent was degassed with Ar. <sup>e</sup> Isolated yield. Ar = 2,4-di-*t*-Bu-Ph.

We screened various reaction conditions to find out the optimal reaction conditions for the gold catalyzed cycloisomerization of compound **1a**. We found that the product **3a** can be obtained in 82% yield using PPh<sub>3</sub>AuCl/AgSbF<sub>6</sub> as catalyst (Table SI-1, entry 1). The yield of **3a** dropped to 27% when the reaction was conducted under O<sub>2</sub> atmosphere (Table SI-1, entry 2). No reaction occurred when the reaction was conducted in acetonitrile (Table SI-1, entry 3). The product can be obtained in 81% yield using [JohnPhosAu·MeCN]SbF<sub>6</sub> as a catalyst (Table SI-1, entry 4). When the temperature was lowered to -20 °C, the desired product was obtained in 35% yield and the compound **1a** can be recovered quantitatively (Table SI-1, entry 5). When the reaction was conducted at 0 °C and the solvent was degassed with Ar, the desired product can be obtained in 92% yield, and the unidentified byproduct could not be detected (Table SI-1, entry 6). When the reaction was conducted at 60 °C in DCE, the yield dropped to 61% (Table SI-1, entry 7). Other gold catalysts such as [(*p*-F-Ph)<sub>3</sub>PAu·MeCN]SbF<sub>6</sub>, [(*p*-CF<sub>3</sub>-Ph)<sub>3</sub>PAu·MeCN]SbF<sub>6</sub>, [P(OAr)<sub>3</sub>Au·MeCN]SbF<sub>6</sub>, [(*t*-Bu)<sub>3</sub>PAu·MeCN]SbF<sub>6</sub>, [JackiePhosAu·MeCN]SbF<sub>6</sub>, [XPhosAu·MeCN]SbF<sub>6</sub>, and [IPrAu·MeCN]SbF<sub>6</sub> can only gave inferior results (Table SI-1, entries 8-14).

The primary ligand effect was not obvious. Electron-deficient P(OAr)<sub>3</sub> ligand was not effective for our reaction. PPh<sub>3</sub>, P(*p*-F-Ph)<sub>3</sub>, and P(*p*-CF<sub>3</sub>-Ph)<sub>3</sub> gave similar result, indicating that electronic effect in the ligand was not obvious. Poor yield was obtained with electron-rich P(*t*-Bu)<sub>3</sub> or IPr ligand. The JohnPhos ligand was found to be the best ligand, and other Buchwald type ligands such as XPhos or JackiePhos gave poor result.

## 5. Spectroscopic Data.

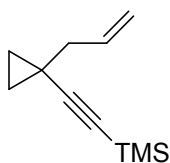

### **((1-Allylcyclopropyl)ethynyl)trimethylsilane s-4a:**

17.2 g, yield = 63%. Colorless oil.  $^1\text{H}$  NMR (400 MHz,  $\text{CDCl}_3$ , TMS):  $\delta$  0.12 (s, 9H,  $\text{CH}_3$ ), 0.63 (dd,  $J_1 = 6.4$  Hz,  $J_2 = 4.4$  Hz, 2H,  $\text{CH}_2$ ), 0.91 (dd,  $J_1 = 6.8$  Hz,  $J_2 = 4.4$  Hz, 2H,  $\text{CH}_2$ ), 2.12 (d,  $J = 7.2$  Hz, 2H,  $\text{CH}_2$ ), 5.05-5.10 (m, 2H,  $=\text{CH}_2$ ), 5.85-5.96 (m, 1H,  $=\text{CH}$ ).  $^{13}\text{C}$  NMR (100 MHz,  $\text{CDCl}_3$ , TMS):  $\delta$  0.24, 12.2, 15.0, 41.8, 80.6, 111.7, 116.5, 135.3. IR ( $\text{CH}_2\text{Cl}_2$ )  $\nu$  3081, 2960, 2159, 1249, 912, 837, 758, 697  $\text{cm}^{-1}$ . MS (%)  $m/z$  178 ( $\text{M}^+$ , 0.51), 163 (47.68), 145 (5.28), 135 (26.62), 123 (43.77), 104 (20.68), 73 (100.00), 59 (56.78), 43 (19.16). HRMS (EI) calcd. for  $\text{C}_{11}\text{H}_{18}\text{Si}$ : 178.1178, found: 178.1174.

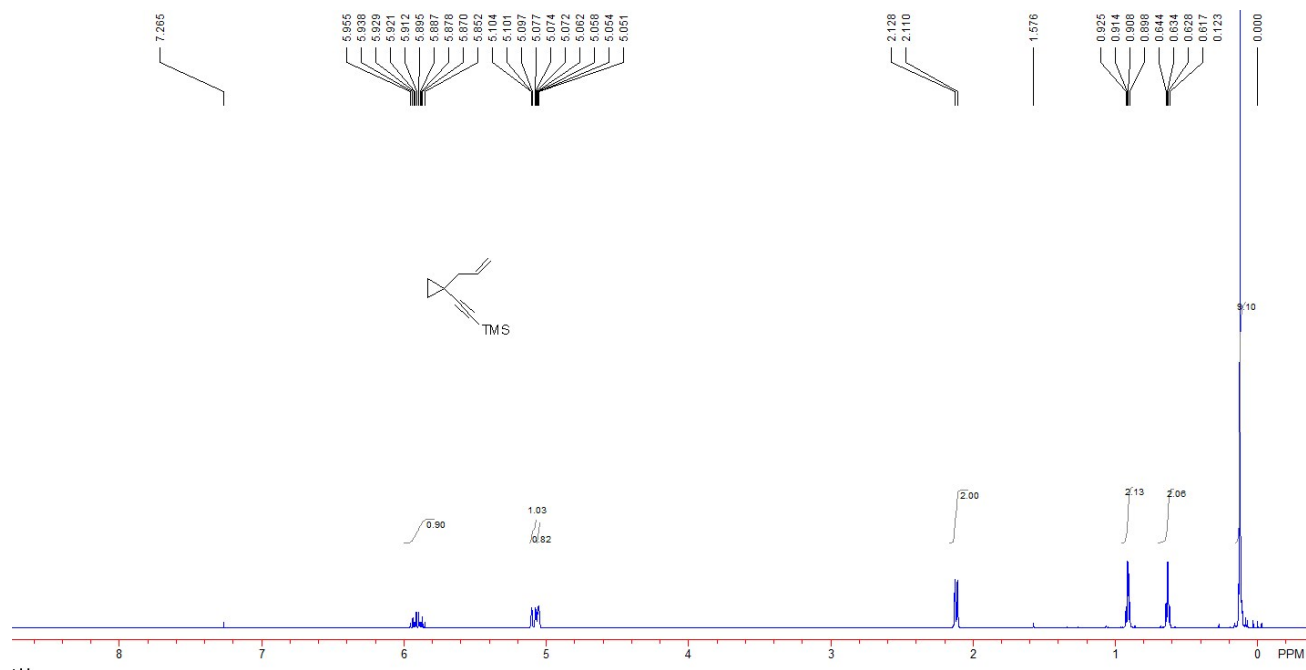

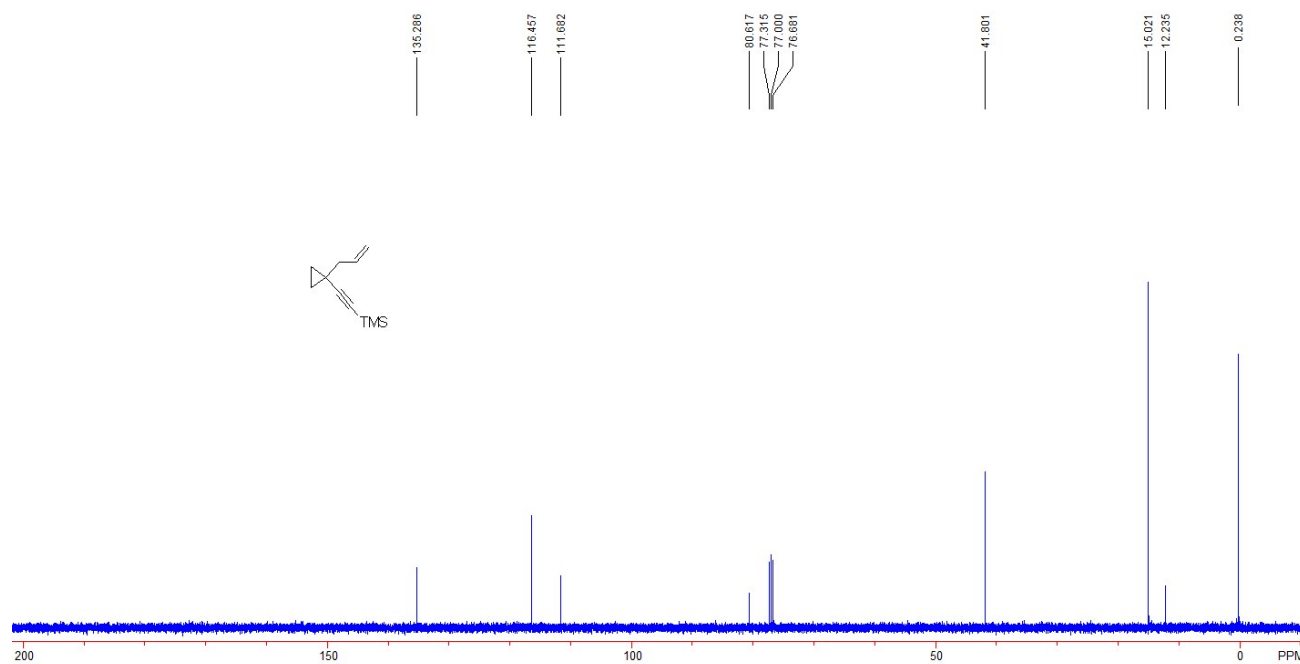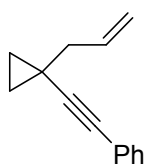

**((1-allylcyclopropyl)ethynyl)benzene 1a:**

This is a known compound.<sup>[5]</sup> Colorless oil. <sup>1</sup>H NMR (400 MHz, CDCl<sub>3</sub>, TMS): δ 0.73 (dd,  $J_1 = 6.4$  Hz,  $J_2 = 4.0$  Hz, 2H, CH<sub>2</sub>), 1.01 (dd,  $J_1 = 6.4$  Hz,  $J_2 = 4.0$  Hz, 2H, CH<sub>2</sub>), 2.21 (d,  $J = 6.8$  Hz, 2H, CH<sub>2</sub>), 5.09-5.17 (m, 2H, =CH<sub>2</sub>), 5.93-6.03 (m, 1H, CH<sub>2</sub>), 7.24-7.28 (m, 3H, Ar), 7.35-7.38 (m, 2H, Ar). <sup>13</sup>C NMR (100 MHz, CDCl<sub>3</sub>, TMS): δ 12.0, 15.0, 42.0, 77.0, 94.7, 116.5, 123.9, 127.4, 128.1, 131.6, 135.5.

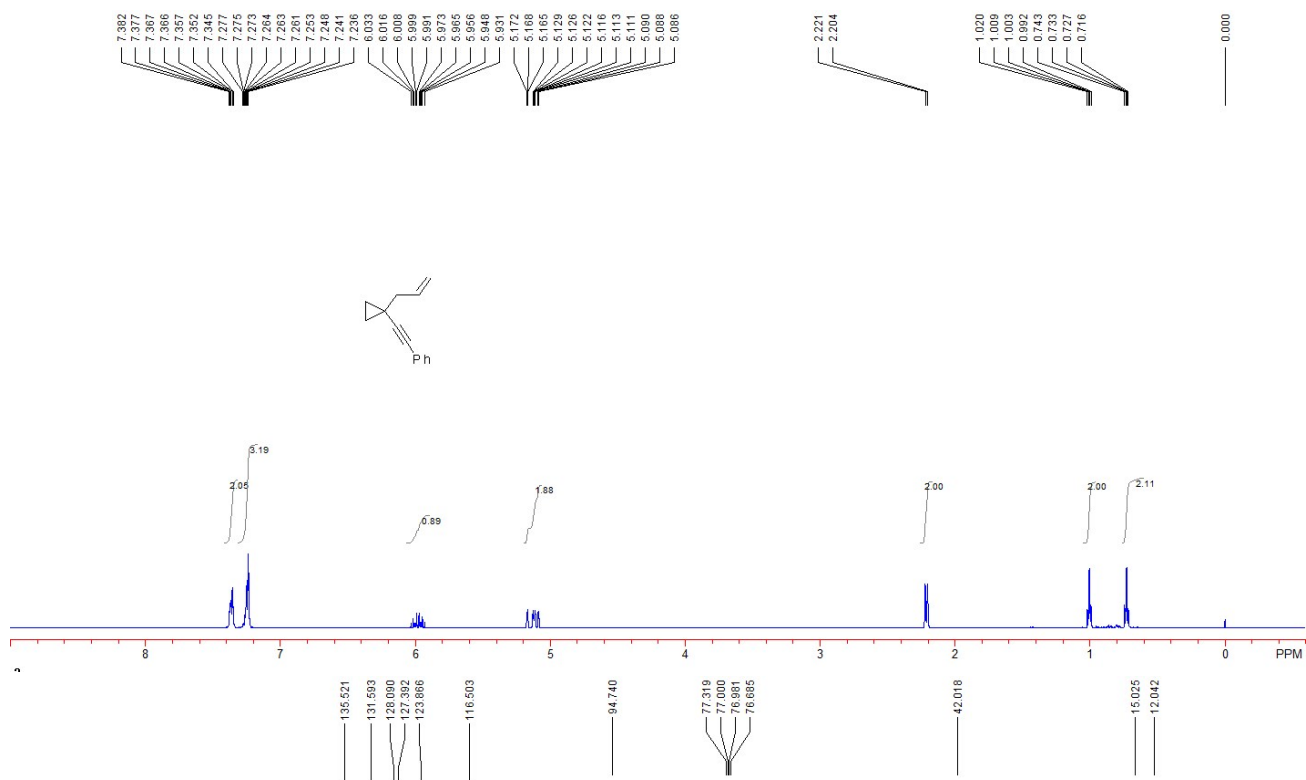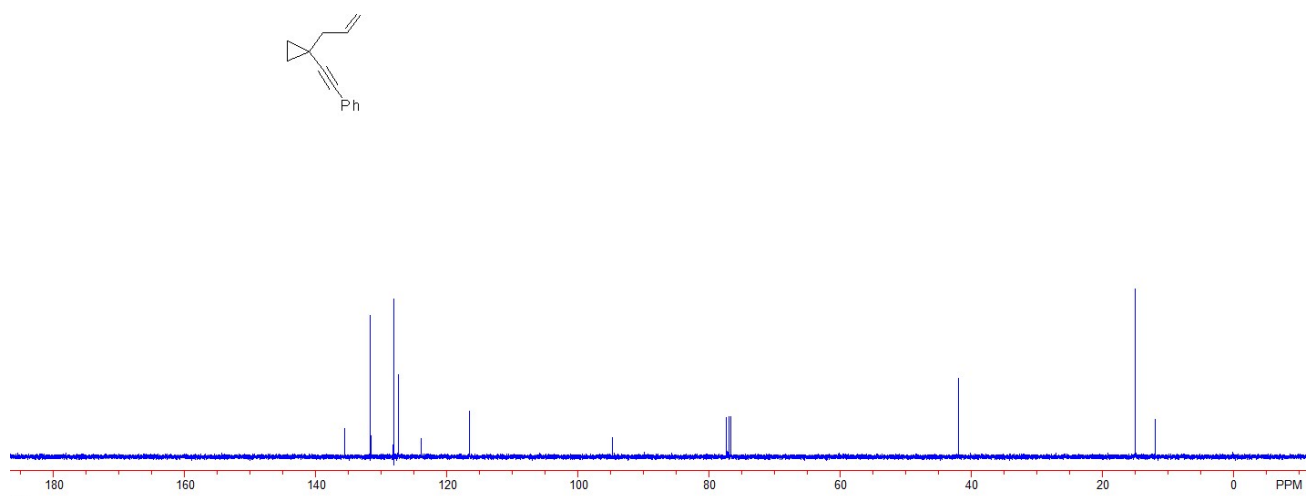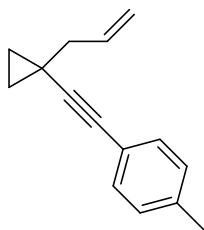

### 1-((1-Allylcyclopropyl)ethynyl)-4-methylbenzene **1b**:

0.350 g, yield = 89%. Colorless oil. <sup>1</sup>H NMR (400 MHz, CDCl<sub>3</sub>, TMS): δ 0.71 (dd,  $J_1 = 6.8$  Hz,  $J_2 = 4.4$  Hz, 2H, CH<sub>2</sub>), 0.99 (dd,  $J_1 = 6.8$  Hz,  $J_2 = 4.4$  Hz, 2H, CH<sub>2</sub>), 2.20 (d,  $J = 6.8$  Hz, 2H, CH<sub>2</sub>), 2.31 (s, 3H, CH<sub>3</sub>), 5.09 (dd,  $J_1 = 10.4$  Hz,  $J_2 = 1.6$  Hz, 1H, =CH<sub>2</sub>), 5.14 (dd,  $J_1 = 17.2$  Hz,  $J_2 = 1.6$  Hz, 1H,

=CH<sub>2</sub>), 5.93-6.03 (m, 1H, =CH), 7.05 (d, *J* = 8.0 Hz, 2H, Ar), 7.26 (d, *J* = 8.0 Hz, 2H, Ar). <sup>13</sup>C NMR (100 MHz, CDCl<sub>3</sub>, TMS): δ 12.0, 15.0, 21.4, 42.1, 93.9, 116.4, 120.8, 128.8, 131.5, 135.6, 137.3. IR (CH<sub>2</sub>Cl<sub>2</sub>) ν 3088, 3006, 2921, 1610, 1423, 996, 914, 815 cm<sup>-1</sup>. MS (%) *m/z* 196 (M<sup>+</sup>, 19.52), 181 (100.00), 155 (98.40), 128 (63.35), 115 (84.27), 105 (44.33), 89 (29.70), 77 (27.34), 63 (17.97). HRMS (EI) calcd. for C<sub>15</sub>H<sub>16</sub>: 196.1252, found: 196.1256.

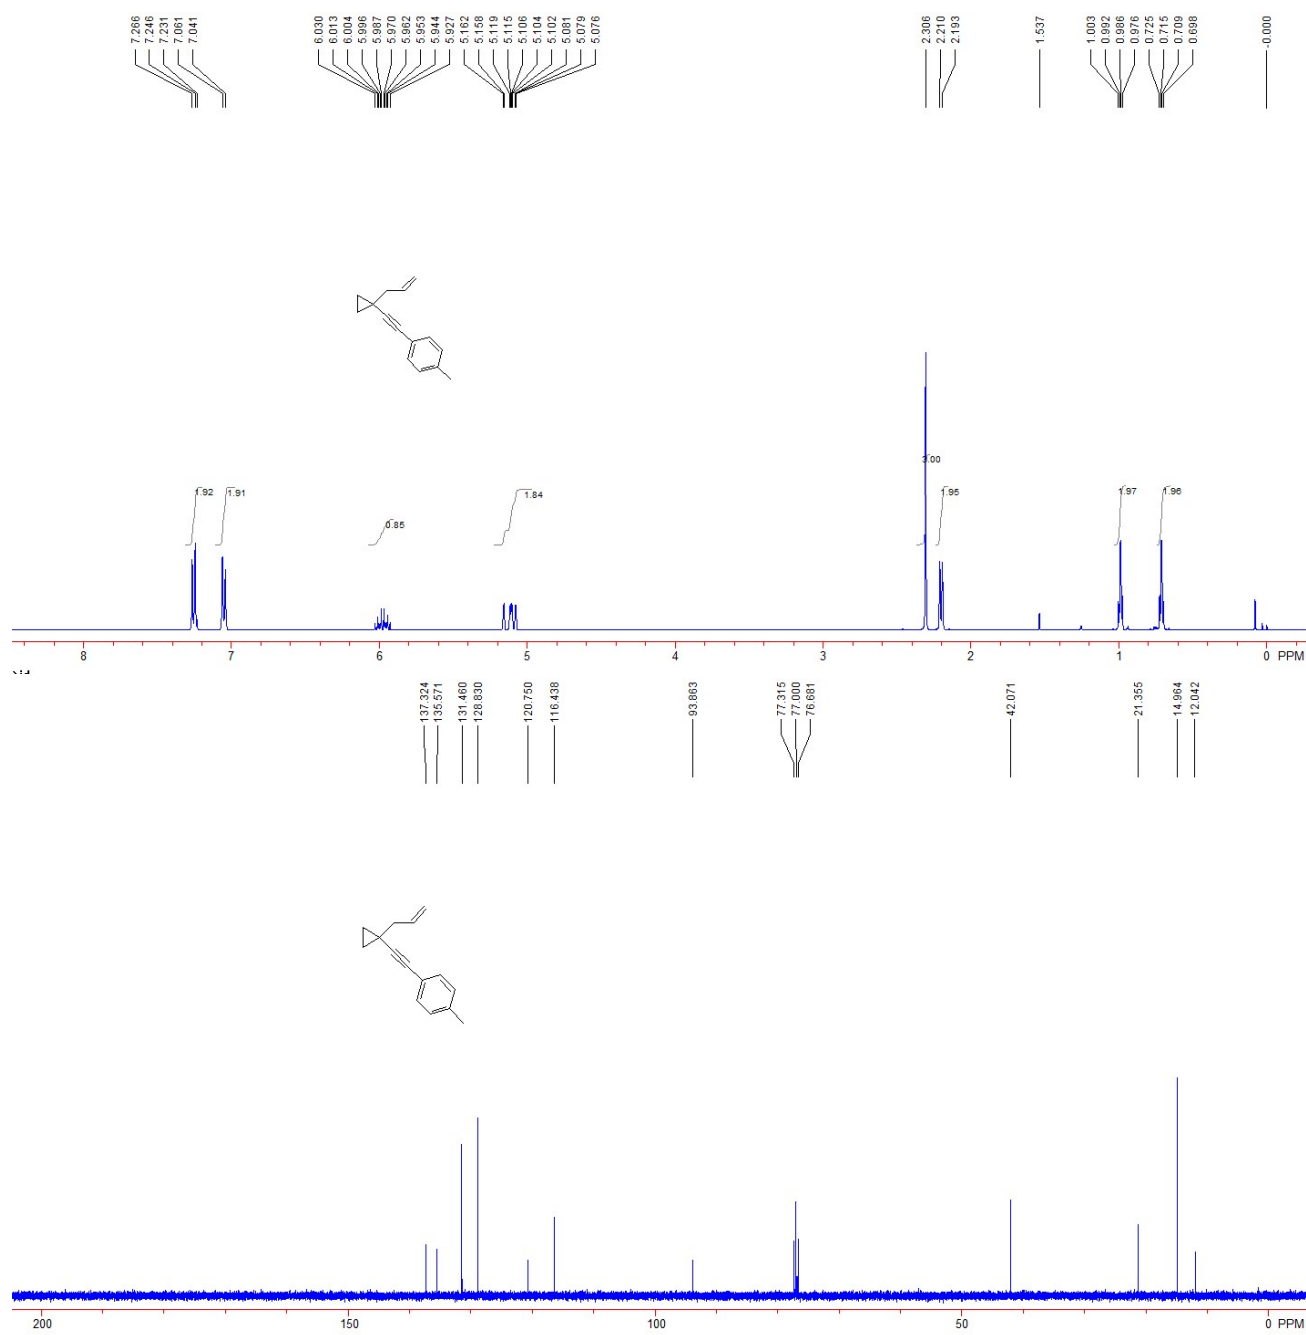

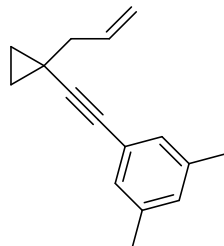

**1-((1-Allylcyclopropyl)ethynyl)-3,5-dimethylbenzene 1c:**

0.703 g, yield = 96%. Colorless oil.  $^1\text{H}$  NMR (400 MHz,  $\text{CDCl}_3$ , TMS):  $\delta$  0.70 (dd,  $J_1 = 6.8$  Hz,  $J_2 = 4.4$  Hz, 2H,  $\text{CH}_2$ ), 0.98 (dd,  $J_1 = 6.8$  Hz,  $J_2 = 4.4$  Hz, 2H,  $\text{CH}_2$ ), 2.19 (d,  $J = 6.8$  Hz, 2H,  $\text{CH}_2$ ), 2.23 (s, 6H,  $\text{CH}_3$ ), 5.09 (d,  $J = 10.4$  Hz, 1H,  $=\text{CH}_2$ ), 5.14 (d,  $J = 17.2$  Hz, 1H,  $=\text{CH}_2$ ), 5.92-6.02 (m, 1H,  $=\text{CH}$ ), 6.85 (s, 1H, Ar), 6.99 (s, 2H, Ar).  $^{13}\text{C}$  NMR (100 MHz,  $\text{CDCl}_3$ , TMS):  $\delta$  12.0, 15.0, 21.0, 42.0, 76.7, 93.9, 116.4, 123.4, 129.3, 135.5, 137.5. IR ( $\text{CH}_2\text{Cl}_2$ )  $\nu$  3078, 3006, 2918, 1597, 1423, 913, 996, 689  $\text{cm}^{-1}$ . MS (%)  $m/z$  210 ( $\text{M}^+$ , 83.76), 195 (100.00), 165 (73.18), 153 (55.25), 128 (40.44), 115 (38.91), 89 (28.54), 77 (28.47), 63 (13.40). HRMS (EI) calcd. for  $\text{C}_{16}\text{H}_{18}$ : 210.1409, found: 210.1411.

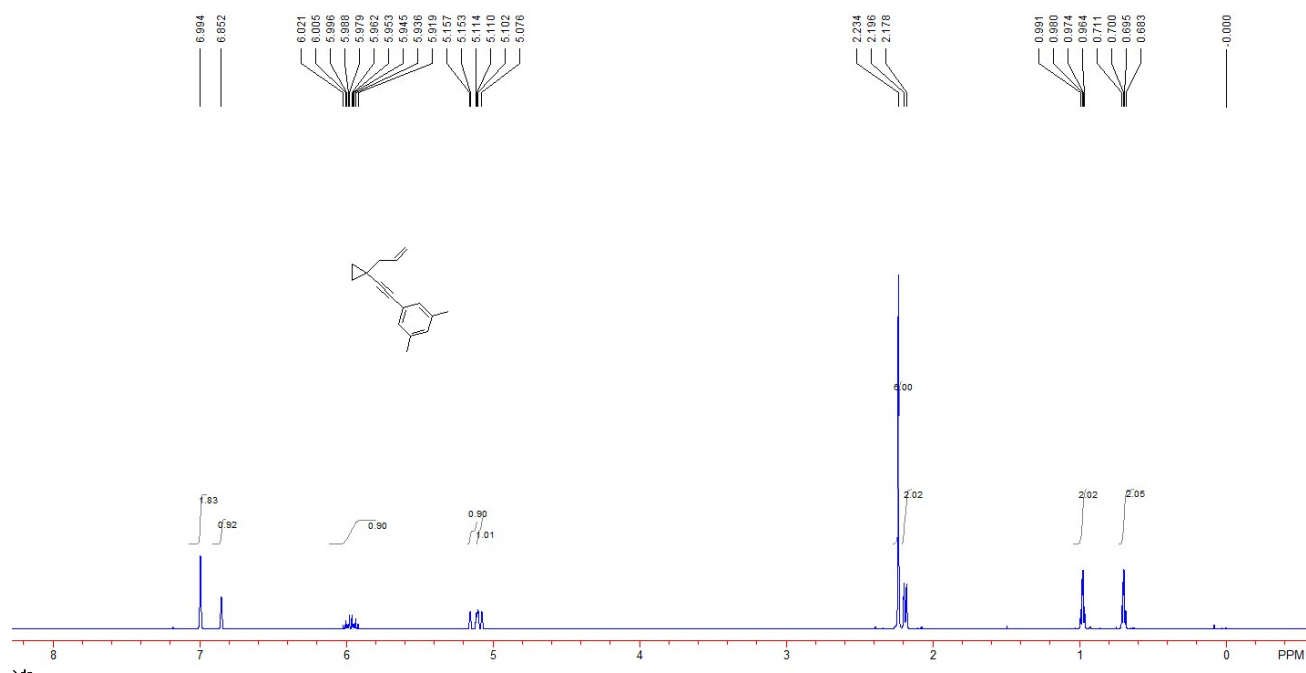

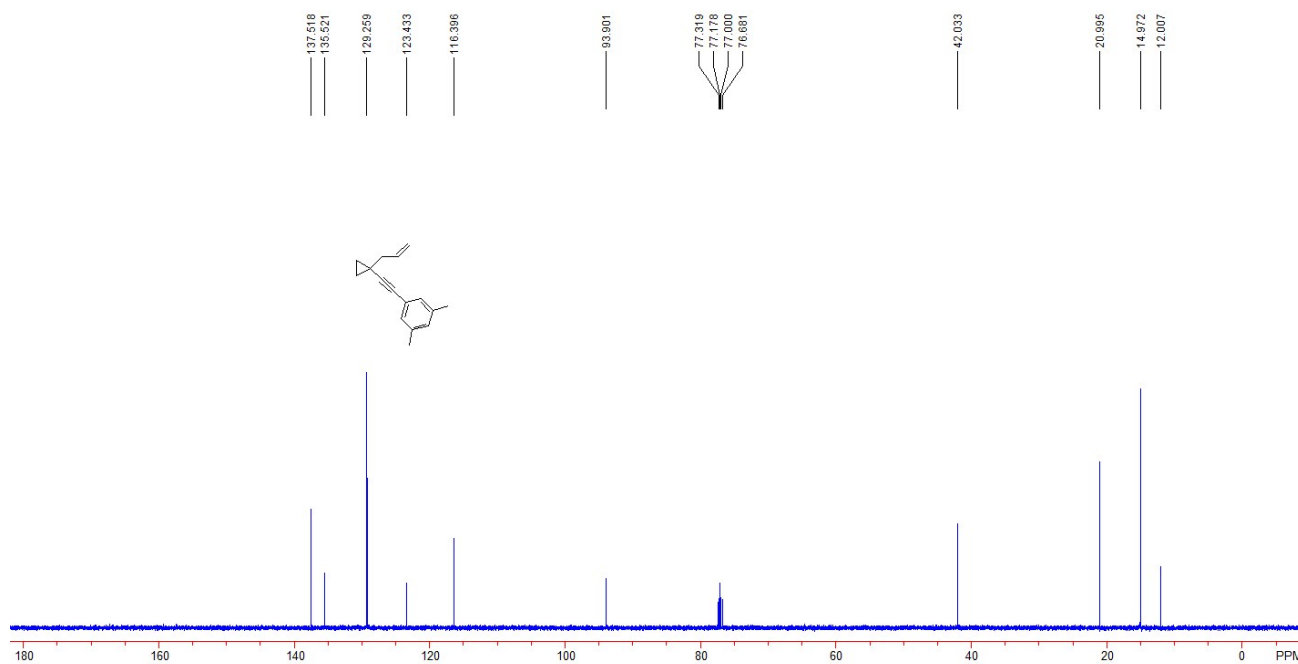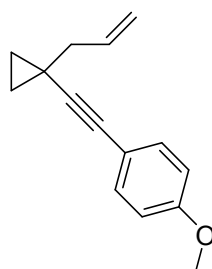

**1-((1-Allylcyclopropyl)ethynyl)-4-methoxybenzene 1d:**

0.585 g, yield = 92%. Colorless oil. <sup>1</sup>H NMR (400 MHz, CDCl<sub>3</sub>, TMS): δ 0.70 (dd, *J*<sub>1</sub> = 6.4 Hz, *J*<sub>2</sub> = 4.4 Hz, 2H, CH<sub>2</sub>), 0.98 (dd, *J*<sub>1</sub> = 6.4 Hz, *J*<sub>2</sub> = 4.4 Hz, 2H, CH<sub>2</sub>), 2.20 (d, *J* = 6.8 Hz, 2H, CH<sub>2</sub>), 5.09 (d, *J* = 10.4 Hz, 1H, =CH<sub>2</sub>), 5.14 (d, *J* = 17.2 Hz, 1H, =CH<sub>2</sub>), 5.93-6.03 (m, 1H, =CH), 6.77 (d, *J* = 8.8 Hz, 2H, Ar), 7.30 (d, *J* = 8.8 Hz, 2H, Ar). <sup>13</sup>C NMR (100 MHz, CDCl<sub>3</sub>, TMS): δ 12.0, 14.9, 42.1, 55.1, 76.7, 93.0, 113.7, 116.0, 116.4, 132.9, 135.6, 158.9. IR (CH<sub>2</sub>Cl<sub>2</sub>) ν 3076, 3004, 2836, 1606, 1508, 1245, 1169, 1032, 830 cm<sup>-1</sup>. MS (%) *m/z* 212 (M<sup>+</sup>, 76.92), 197 (37.70), 184 (18.08), 171 (89.76), 141 (42.96), 128 (100.00), 115 (77.76), 102 (30.33), 89 (20.75), 71 (18.03). HRMS (EI) calcd. for C<sub>15</sub>H<sub>16</sub>O: 212.1201, found: 212.1198.

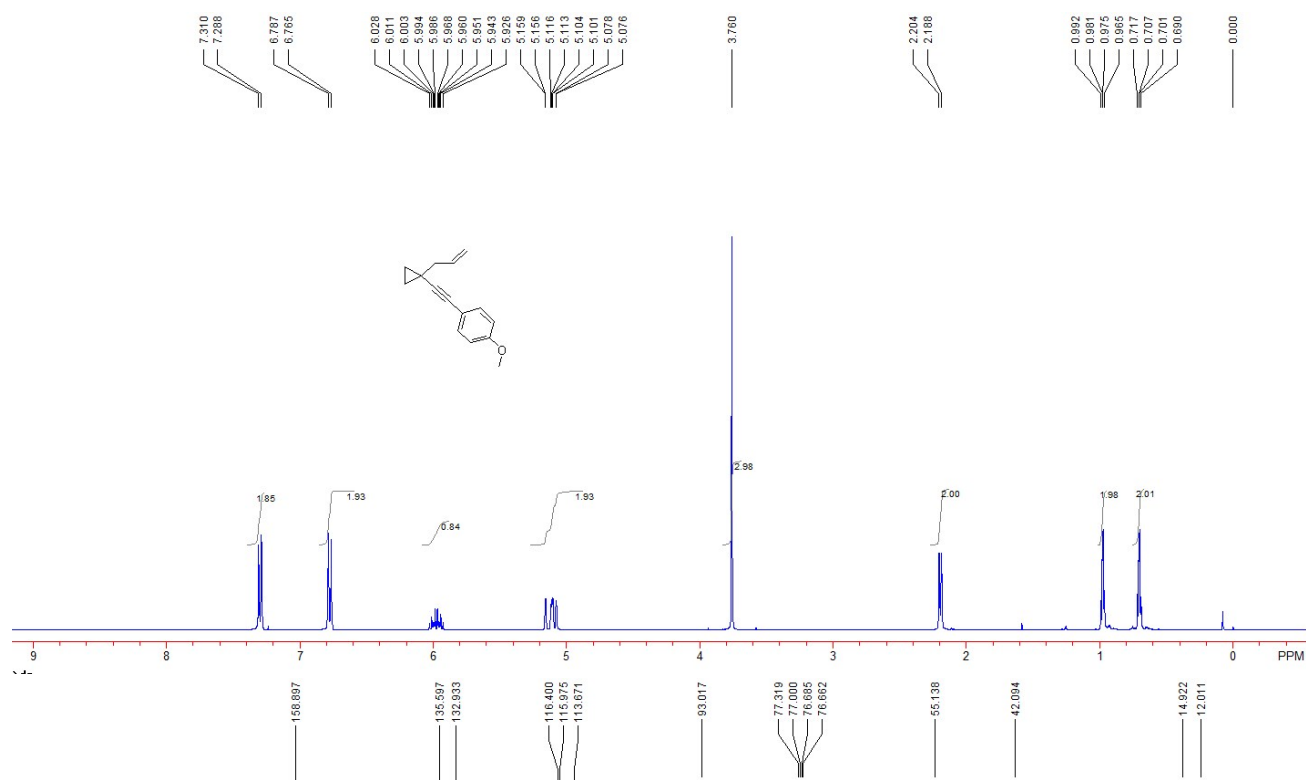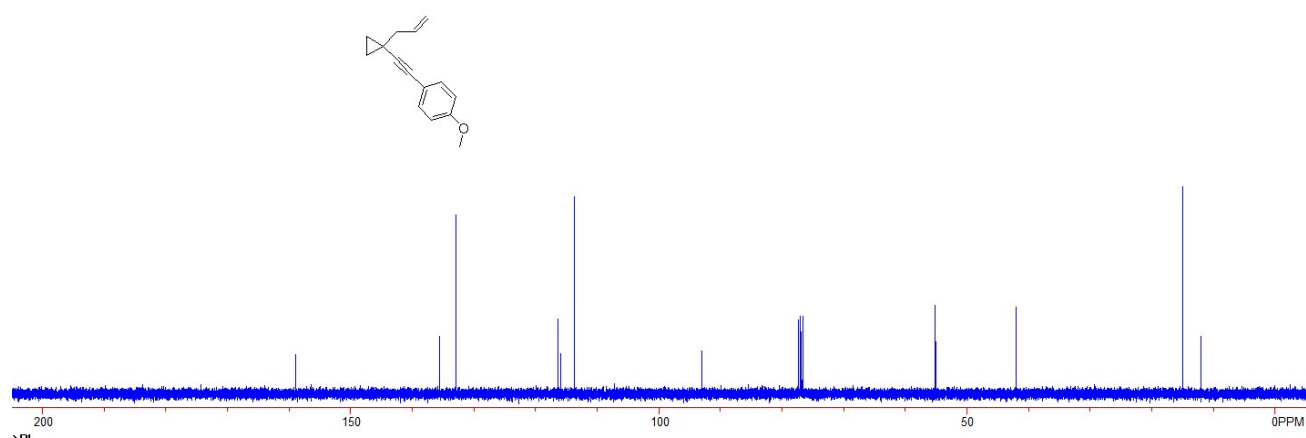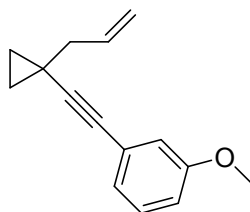

### 1-((1-Allylcyclopropyl)ethynyl)-3-methoxybenzene 1e:

0.783, yield = 74%. Colorless oil. <sup>1</sup>H NMR (400 MHz, CDCl<sub>3</sub>, TMS): δ 0.77 (dd,  $J_1 = 6.4$  Hz,  $J_2 = 4.4$  Hz, 2H, CH<sub>2</sub>), 1.00 (dd,  $J_1 = 6.4$  Hz,  $J_2 = 4.4$  Hz, 2H, CH<sub>2</sub>), 2.19 (d,  $J = 6.8$  Hz, 2H, CH<sub>2</sub>), 3.72 (s, 3H, CH<sub>3</sub>), 5.07-5.17 (m, 2H, =CH<sub>2</sub>), 5.93-6.00 (m, 1H, =CH), 6.77-6.79 (m, 1H, Ar), 6.89-6.90 (m,

1H, Ar), 6.94-6.97 (m, 1H, Ar), 7.11-7.20 (m, 1H, Ar). <sup>13</sup>C NMR (100 MHz, CDCl<sub>3</sub>, TMS): δ 11.9, 14.9, 41.9, 55.0, 76.9, 94.5, 113.9, 116.3, 116.4, 124.1, 124.8, 129.1, 135.4, 159.1. IR (CH<sub>2</sub>Cl<sub>2</sub>) ν 3076, 3004, 2907, 2834, 1596, 1481, 1247, 1042, 777 cm<sup>-1</sup>. MS (%) m/z 212 (M<sup>+</sup>, 91.60), 197 (34.68), 171 (57.53), 165 (38.08), 141 (32.19), 128 (100.00), 115 (77.17), 102 (32.79), 91 (21.77). HRMS (EI) calcd. for C<sub>15</sub>H<sub>16</sub>O: 212.1201, found: 212.1205.

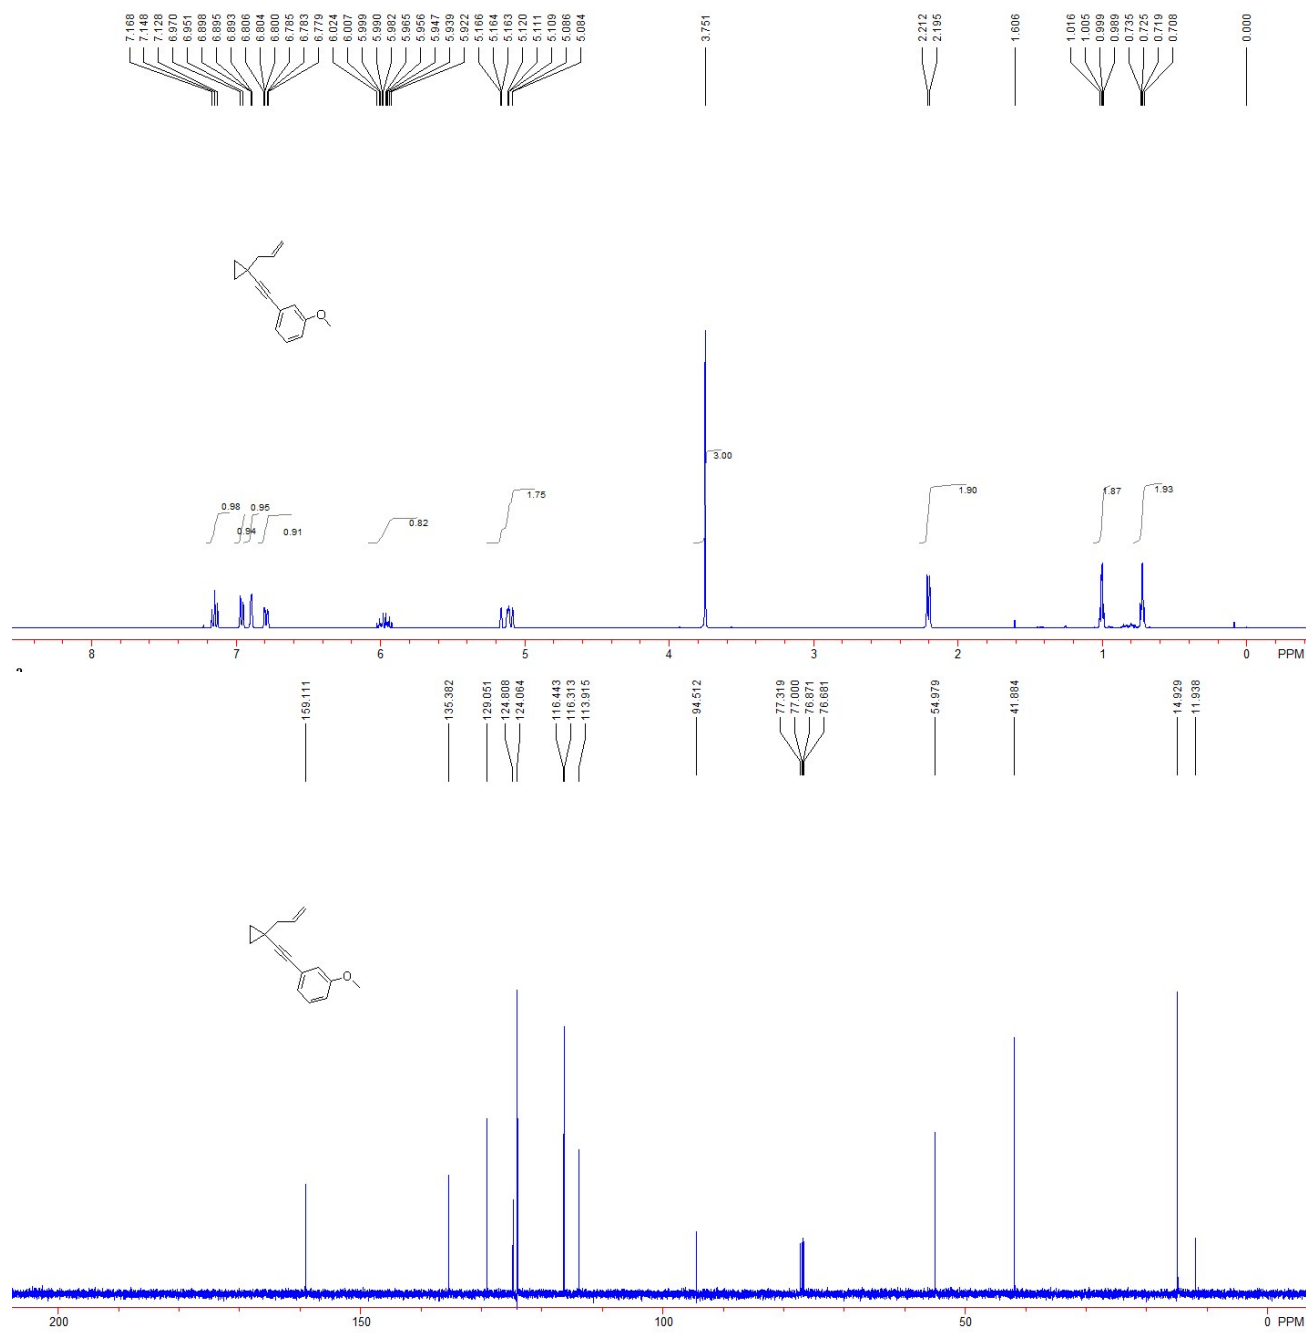

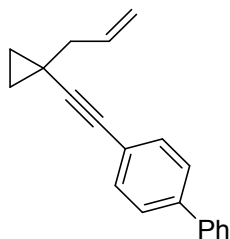

**4-((1-Allylcyclopropyl)ethynyl)-1,1'-biphenyl 1f:**

1.053 g, yield = 91%. Colorless oil.  $^1\text{H}$  NMR (400 MHz,  $\text{CDCl}_3$ , TMS):  $\delta$  0.71 (dd,  $J_1 = 6.8$  Hz,  $J_2 = 4.4$  Hz, 2H,  $\text{CH}_2$ ), 1.01 (dd,  $J_1 = 6.8$  Hz,  $J_2 = 4.4$  Hz, 2H,  $\text{CH}_2$ ), 2.20 (d,  $J = 6.8$  Hz, 2H,  $\text{CH}_2$ ), 5.11 (d,  $J = 10.8$  Hz, 1H,  $=\text{CH}_2$ ), 5.13 (dd,  $J_1 = 17.2$  Hz,  $J_2 = 1.6$  Hz, 1H,  $=\text{CH}_2$ ), 5.93-6.03 (m, 1H,  $=\text{CH}$ ), 7.27 (dd,  $J_1 = 7.6$  Hz,  $J_2 = 7.2$  Hz, 1H, Ar), 7.35 (d,  $J = 8.0$  Hz, 1H, Ar), 7.38-7.46 (m, 4H, Ar), 7.51 (d,  $J = 7.2$  Hz, 2H, Ar).  $^{13}\text{C}$  NMR (100 MHz,  $\text{CDCl}_3$ , TMS):  $\delta$  12.1, 15.0, 42.0, 76.9, 95.4, 116.5, 122.8, 126.7, 126.8, 127.3, 128.7, 132.0, 135.5, 140.0, 140.3. IR ( $\text{CH}_2\text{Cl}_2$ )  $\nu$  3077, 3030, 3005, 1486, 996, 914, 838, 761, 695  $\text{cm}^{-1}$ . MS (%)  $m/z$  258 ( $\text{M}^+$ , 100.00), 243 (45.51), 230 (29.14), 217 (76.57), 202 (57.86), 189 (17.97), 165 (26.95), 115 (19.84), 91 (30.55). HRMS (EI) calcd. for  $\text{C}_{20}\text{H}_{18}$ : 258.1409, found: 258.1411.

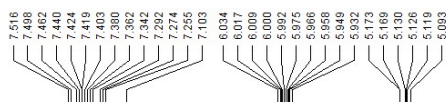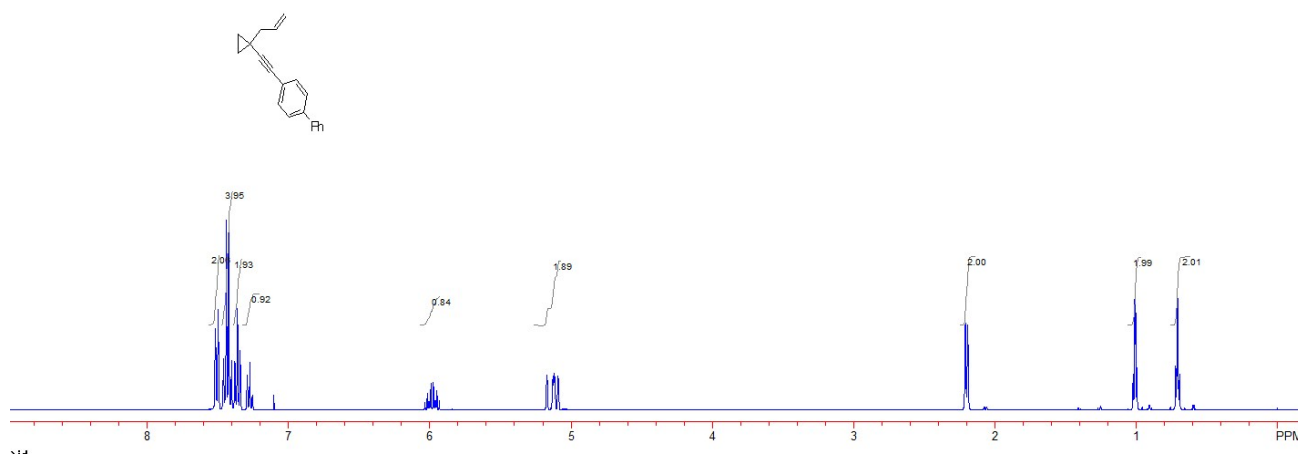

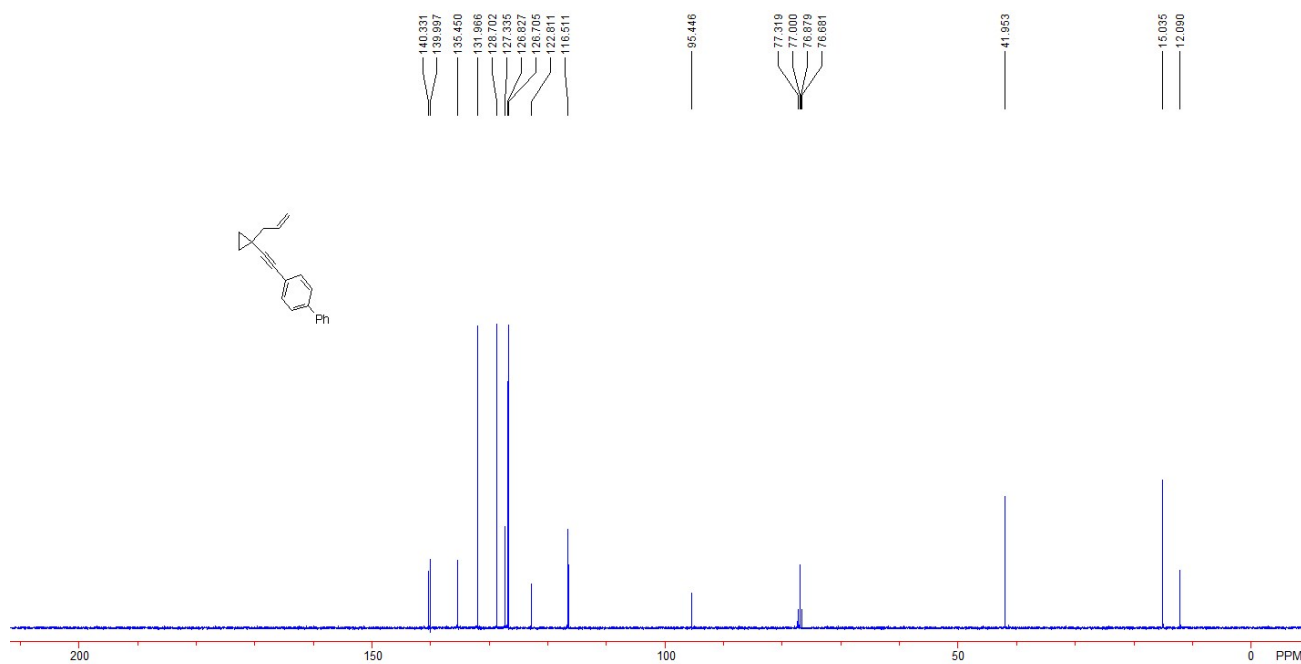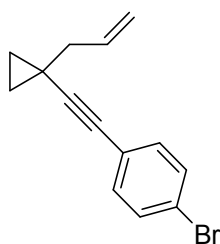

**1-((1-Allylcyclopropyl)ethynyl)-4-bromobenzene 1g:**

0.780 g, yield = 75%. Colorless oil. <sup>1</sup>H NMR (400 MHz, CDCl<sub>3</sub>, TMS): δ 0.72 (dd, *J*<sub>1</sub> = 6.4 Hz, *J*<sub>2</sub> = 4.4 Hz, 2H, CH<sub>2</sub>), 0.99 (dd, *J*<sub>1</sub> = 6.4 Hz, *J*<sub>2</sub> = 4.4 Hz, 2H, CH<sub>2</sub>), 2.19 (d, *J* = 6.4 Hz, 2H, CH<sub>2</sub>), 5.10 (d, *J* = 10.8 Hz, 1H, =CH<sub>2</sub>), 5.13 (d, *J* = 18.8 Hz, 1H, =CH<sub>2</sub>), 5.90-6.00 (m, 1H, =CH), 7.20 (d, *J* = 7.6 Hz, 2H, Ar), 7.36 (d, *J* = 7.6 Hz, 2H, Ar). <sup>13</sup>C NMR (100 MHz, CDCl<sub>3</sub>, TMS): δ 12.0, 15.0, 41.8, 76.0, 96.0, 116.6, 121.4, 122.8, 131.2, 133.0, 135.3. IR (CH<sub>2</sub>Cl<sub>2</sub>) ν 3078, 3005, 2971, 1486, 1069, 940, 915, 821 cm<sup>-1</sup>. MS (%) *m/z* 260 (M<sup>+</sup>, 29.65), 219 (32.04), 181 (34.86), 166 (100.00), 139 (71.51), 114 (25.68), 99 (14.57), 89 (20.29), 76 (28.65). HRMS (EI) calcd. for C<sub>14</sub>H<sub>13</sub>Br: 260.0201, found: 260.0203.

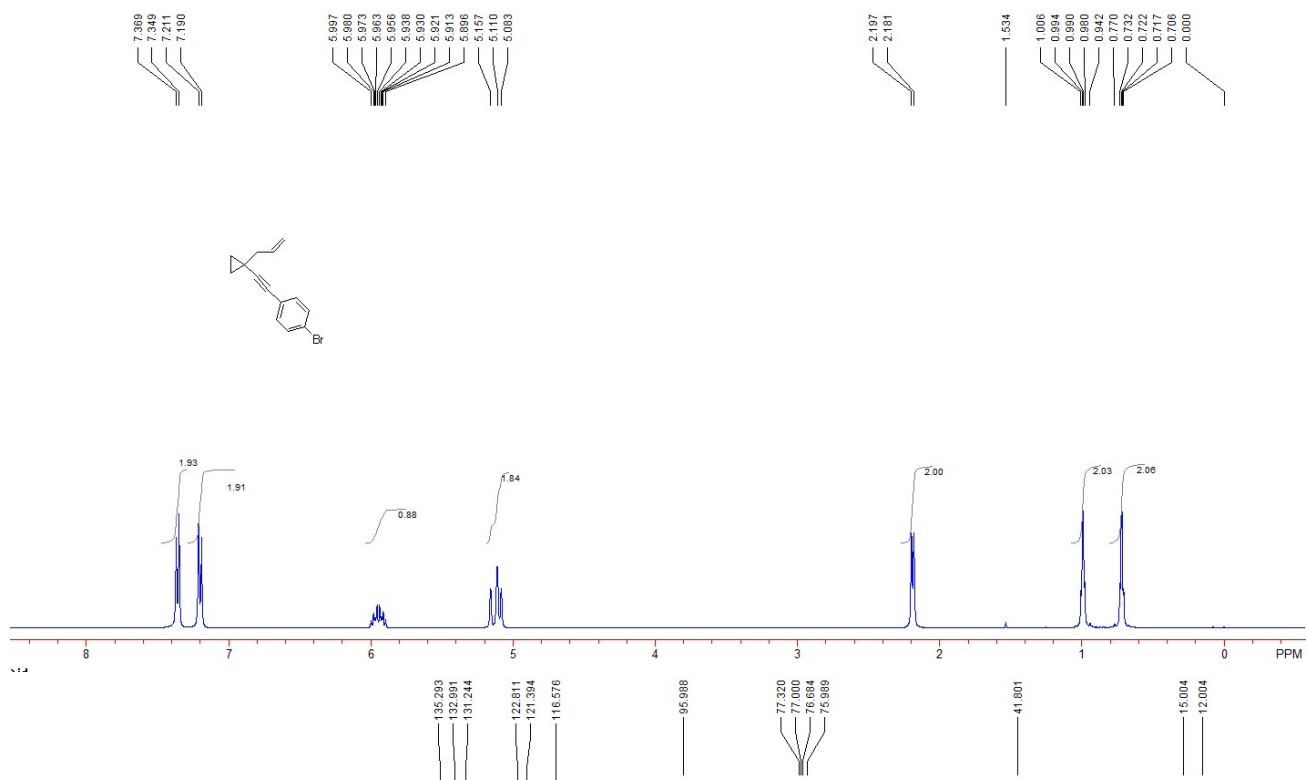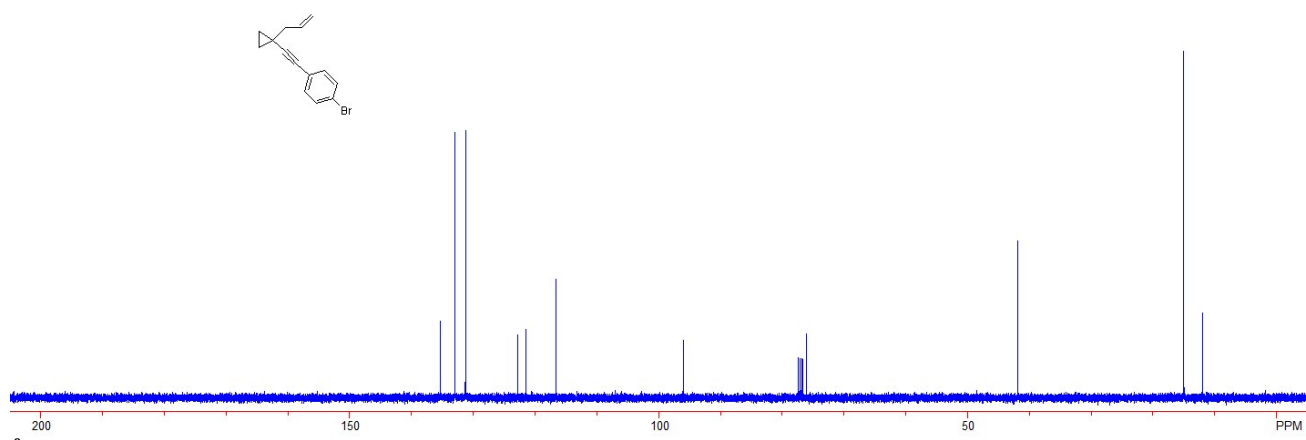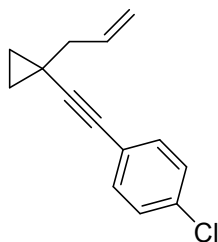

**1-((1-Allylcyclopropyl)ethynyl)-4-chlorobenzene 1h:**

0.737 g, yield = 97%. Colorless oil. <sup>1</sup>H NMR (400 MHz, CDCl<sub>3</sub>, TMS): δ 0.70 (dd,  $J_1 = 6.4$  Hz,  $J_2 = 4.4$  Hz, 2H, CH<sub>2</sub>), 0.99 (dd,  $J_1 = 6.4$  Hz,  $J_2 = 4.4$  Hz, 2H, CH<sub>2</sub>), 2.18 (d,  $J = 6.8$  Hz, 2H, CH<sub>2</sub>), 5.09 (d,  $J = 11.2$  Hz, 1H, =CH<sub>2</sub>), 5.13 (d,  $J = 17.6$  Hz, 1H, =CH<sub>2</sub>), 5.89-5.97 (m, 1H, =CH), 7.19 (d,  $J =$

8.4 Hz, 2H, Ar), 7.26 (d,  $J = 8.4$  Hz, 2H, Ar).  $^{13}\text{C}$  NMR (100 MHz,  $\text{CDCl}_3$ , TMS):  $\delta$  12.0, 15.0, 41.8, 75.9, 95.7, 116.5, 122.3, 128.3, 132.7, 133.2, 135.3. IR ( $\text{CH}_2\text{Cl}_2$ )  $\nu$  3078, 3006, 2903, 2225, 1489, 1090, 915, 825, 711  $\text{cm}^{-1}$ . MS (%)  $m/z$  216 ( $\text{M}^+$ , 57.15), 201 (14.16), 181 (76.26), 166 (100.00), 149 (55.02), 139 (82.24), 125 (52.89), 99 (23.57), 75 (35.70). HRMS (EI) calcd. for  $\text{C}_{14}\text{H}_{13}\text{Cl}$ : 216.0706, found: 216.0707.

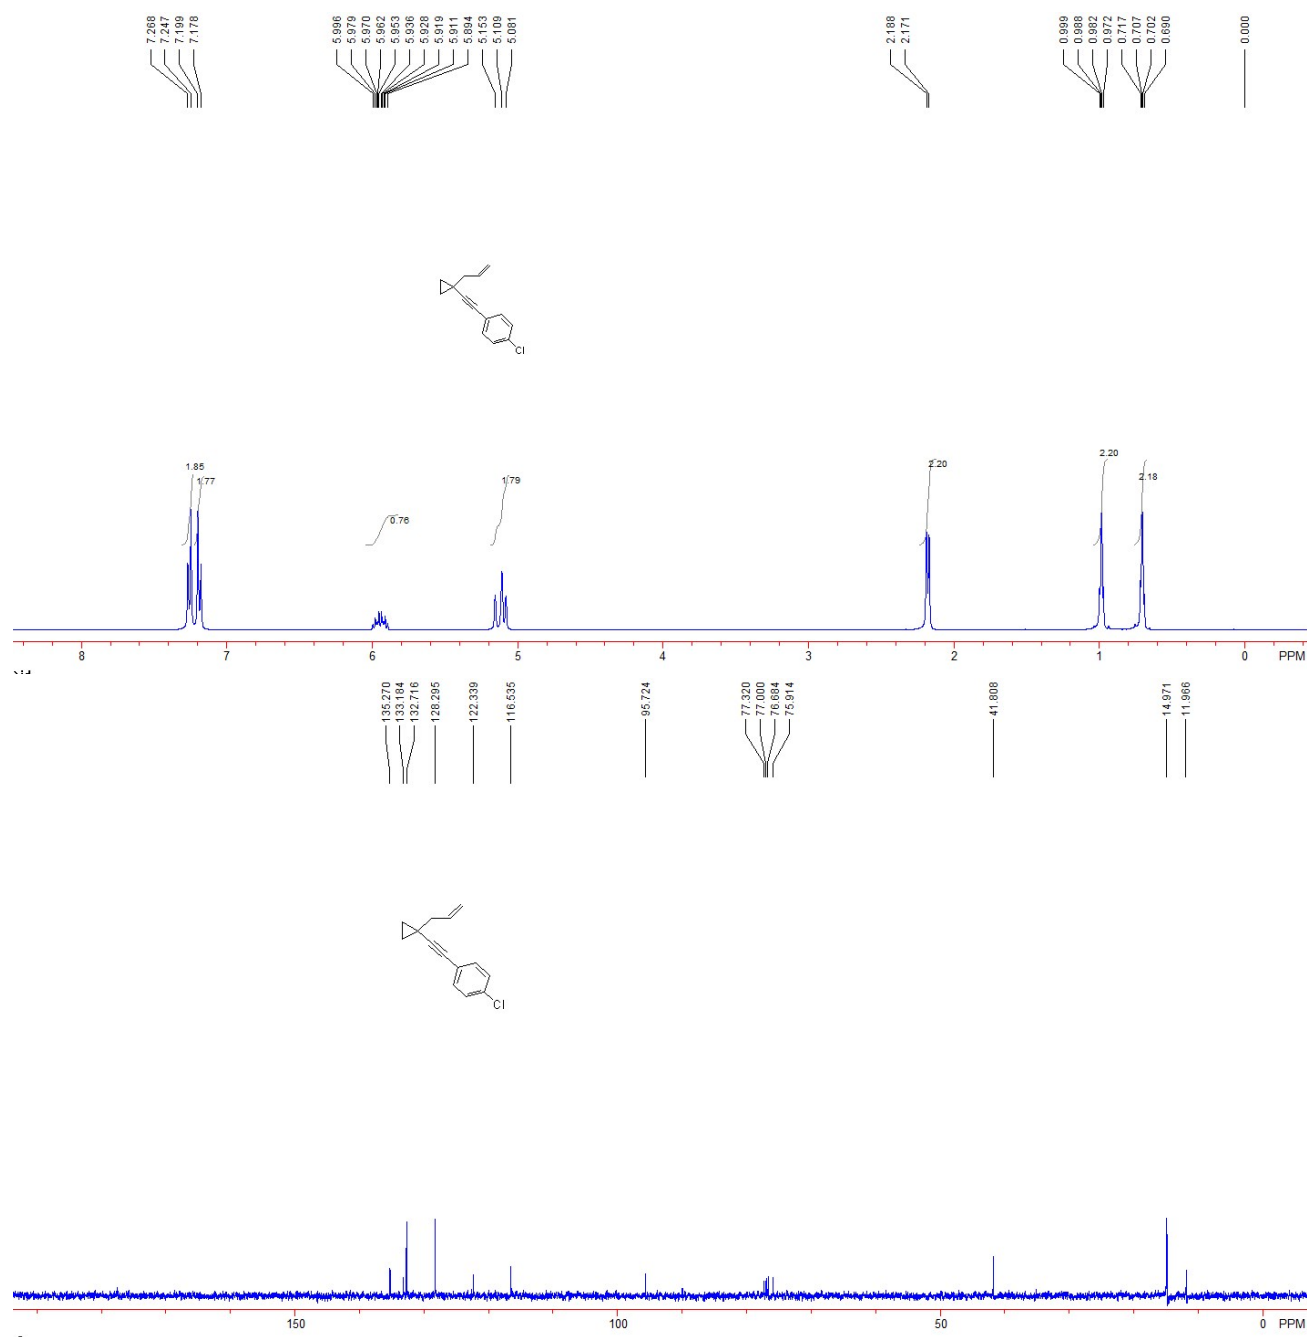

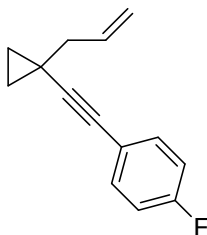

**1-((1-Allylcyclopropyl)ethynyl)-4-fluorobenzene 1i:**

0.599 g, yield = 86%. Colorless oil.  $^1\text{H}$  NMR (400 MHz,  $\text{CDCl}_3$ , TMS):  $\delta$  0.71 (dd,  $J_1 = 6.4$  Hz,  $J_2 = 4.4$  Hz, 2H,  $\text{CH}_2$ ), 0.98 (dd,  $J_1 = 6.4$  Hz,  $J_2 = 4.4$  Hz, 2H,  $\text{CH}_2$ ), 2.19 (d,  $J = 6.8$  Hz, 2H,  $\text{CH}_2$ ), 5.10 (d,  $J = 11.2$  Hz, 1H,  $=\text{CH}_2$ ), 5.14 (d,  $J = 18.8$  Hz, 1H,  $=\text{CH}_2$ ), 5.91-6.01 (m, 1H,  $=\text{CH}$ ), 6.90-6.95 (m, 2H, Ar), 7.30-7.33 (m, 2H, Ar).  $^{13}\text{C}$  NMR (100 MHz,  $\text{CDCl}_3$ , TMS):  $\delta$  11.9, 14.9, 41.9, 75.9, 94.3 (d,  $J = 1.5$  Hz), 115.2 (d,  $J = 21.6$  Hz), 116.5, 119.9 (d,  $J = 3.3$  Hz), 133.3 (d,  $J = 8.2$  Hz), 135.4, 161.9, (d,  $J = 246.9$  Hz).  $^{19}\text{F}$  NMR (376 MHz,  $\text{CDCl}_3$ ,  $\text{CFC}_l_3$ ):  $\delta$  -112.2. IR ( $\text{CH}_2\text{Cl}_2$ )  $\nu$  3078, 3007, 2904, 1507, 1229, 916, 833, 762  $\text{cm}^{-1}$ . MS (%)  $m/z$  200 ( $\text{M}^+$ , 51.61), 185 (48.50), 172 (25.76), 159 (75.50), 133 (100.00), 125 (13.41), 109 (30.56), 75 (16.90), 63 (12.77). HRMS (EI) calcd. for  $\text{C}_{14}\text{H}_{13}\text{F}$ : 200.1001, found: 200.1003.

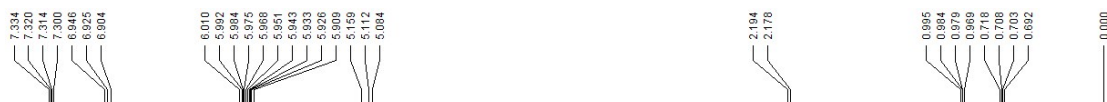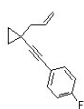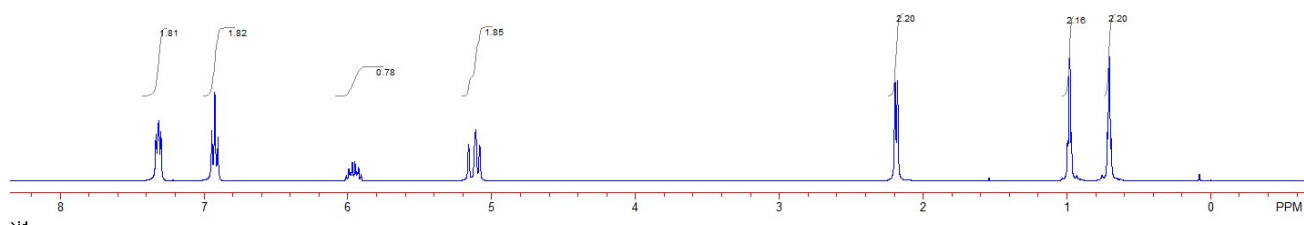

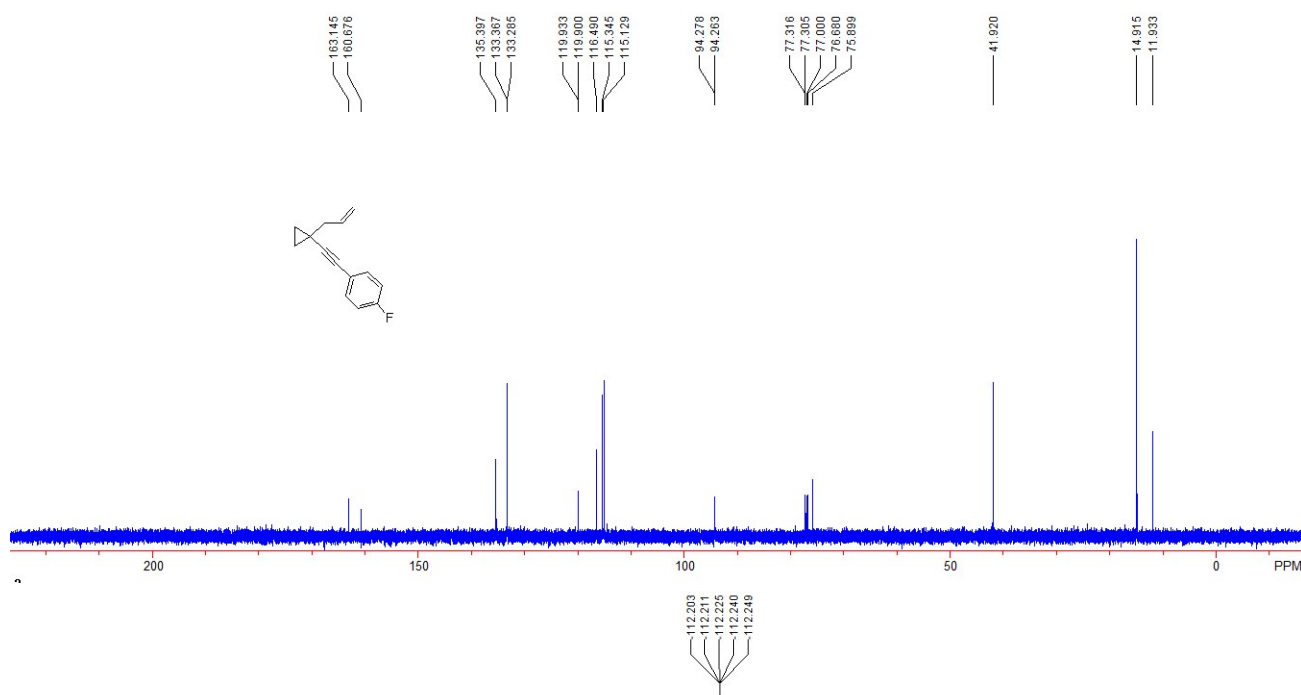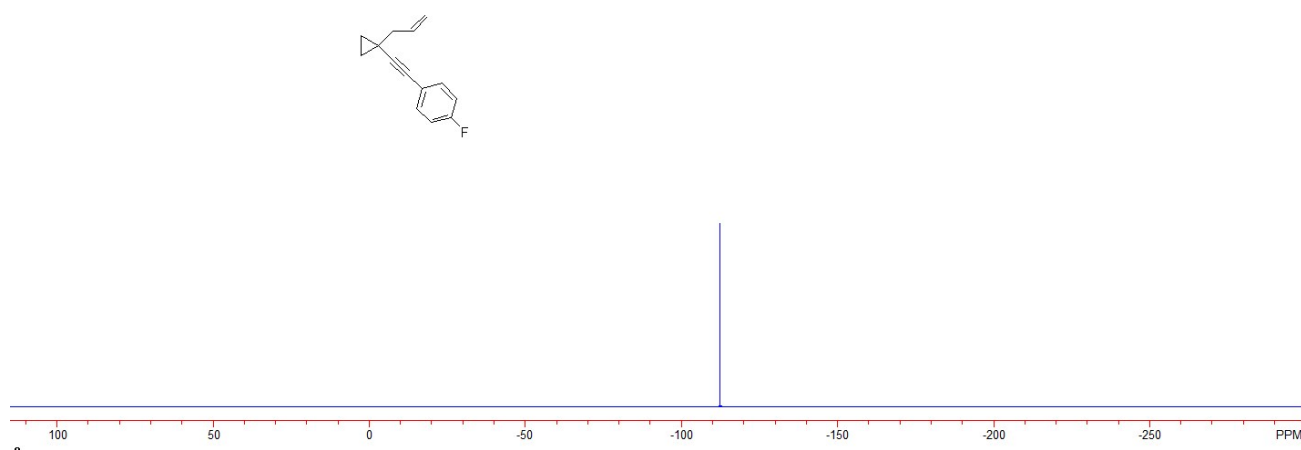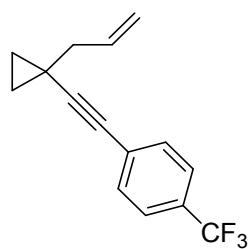

**1-((1-Allylcyclopropyl)ethynyl)-4-(trifluoromethyl)benzene 1j:**

1.093 g, yield = 87%. Colorless oil. <sup>1</sup>H NMR (400 MHz, CDCl<sub>3</sub>, TMS): δ 0.75 (dd, *J*<sub>1</sub> = 6.8 Hz, *J*<sub>2</sub> = 4.4 Hz, 2H, CH<sub>2</sub>), 1.02 (dd, *J*<sub>1</sub> = 6.8 Hz, *J*<sub>2</sub> = 4.4 Hz, 2H, CH<sub>2</sub>), 2.21 (d, *J* = 6.8 Hz, 2H, CH<sub>2</sub>), 5.10-5.13 (m, 1H, =CH<sub>2</sub>), 5.16 (dd, *J*<sub>1</sub> = 15.6 Hz, *J*<sub>2</sub> = 1.6 Hz, 1H, =CH<sub>2</sub>), 5.91-6.01 (m, 1H, =CH), 7.43 (d, *J* = 8.4 Hz, 2H, Ar), 7.48 (d, *J* = 8.4 Hz, 2H, Ar). <sup>13</sup>C NMR (100 MHz, CDCl<sub>3</sub>, TMS): δ 12.1, 15.1,

41.8, 76.0, 97.7, 120.0, 124.1 (q,  $J = 270.3$  Hz), 125.1 (q,  $J = 3.8$  Hz), 127.9 (q,  $J = 1.5$  Hz), 129.1 (q,  $J = 32.6$  Hz), 131.8, 135.3.  $^{19}\text{F}$  NMR (376 MHz,  $\text{CDCl}_3$ ,  $\text{CFCl}_3$ ):  $\delta$  -62.8. IR ( $\text{CH}_2\text{Cl}_2$ )  $\nu$  3080, 2901, 2225, 1614, 1320, 1166, 1104, 1065, 839, 687  $\text{cm}^{-1}$ . MS (%)  $m/z$  250 ( $\text{M}^+$ , 47.75), 235 (71.68), 222 (39.24), 209 (100.00), 181 (70.63), 165 (63.22), 152 (30.33), 133 (23.78), 91 (25.61), 78 (28.10). HRMS (EI) calcd. for  $\text{C}_{15}\text{H}_{13}\text{F}_3$ : 250.0969, found: 250.0972.

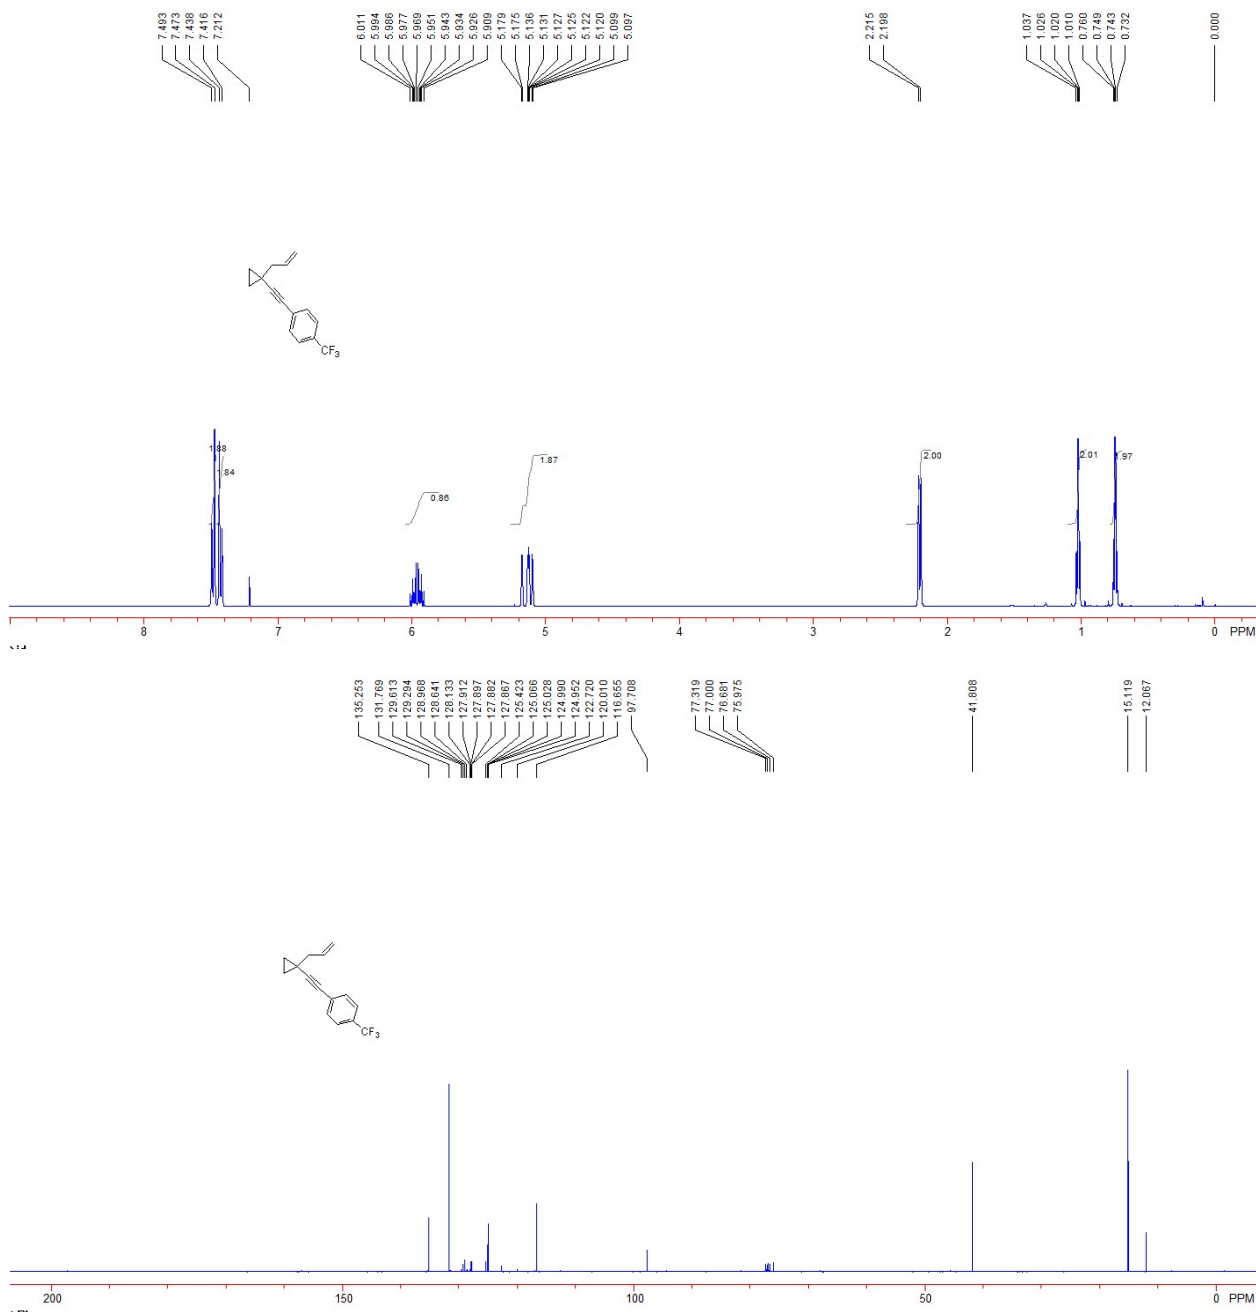

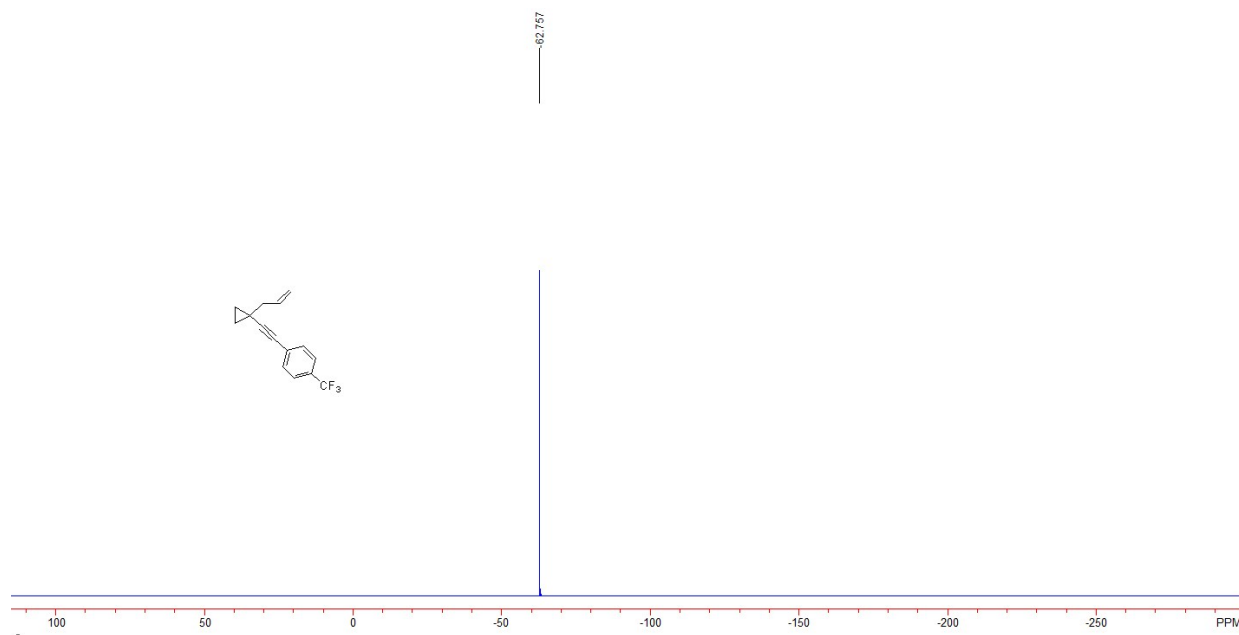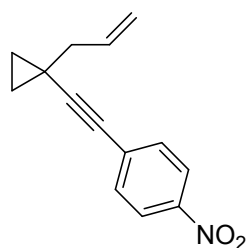

**1-((1-Allylcyclopropyl)ethynyl)-4-nitrobenzene 1k:**

0.905 g, yield = 99%. Brown oil.  $^1\text{H}$  NMR (400 MHz,  $\text{CDCl}_3$ , TMS):  $\delta$  0.81 (dd,  $J_1 = 6.8$  Hz,  $J_2 = 4.4$  Hz, 2H,  $\text{CH}_2$ ), 1.06 (dd,  $J_1 = 6.8$  Hz,  $J_2 = 4.4$  Hz, 2H,  $\text{CH}_2$ ), 2.23 (d,  $J = 6.8$  Hz, 2H,  $\text{CH}_2$ ), 5.12 (dt,  $J_1 = 10.4$  Hz,  $J_2 = 0.8$  Hz, 1H,  $=\text{CH}_2$ ), 5.17 (dd,  $J_1 = 17.6$  Hz,  $J_2 = 1.2$  Hz, 1H,  $=\text{CH}_2$ ), 5.90-6.00 (m, 1H,  $=\text{CH}$ ), 7.45 (d,  $J = 8.8$  Hz, 2H, Ar), 8.10 (d,  $J = 8.8$  Hz, 2H, Ar).  $^{13}\text{C}$  NMR (100 MHz,  $\text{CDCl}_3$ , TMS):  $\delta$  12.0, 15.2, 41.3, 75.6, 101.1, 116.6, 123.1, 130.8, 131.9, 134.9, 146.1. IR ( $\text{CH}_2\text{Cl}_2$ )  $\nu$  3078, 3007, 2903, 2220, 1593, 1514, 1338, 850, 749  $\text{cm}^{-1}$ . MS (%)  $m/e$  227 ( $\text{M}^+$ , 29.87), 212 (13.69), 186 (42.62), 180 (46.12), 165 (100.00), 115 (31.26), 91 (27.05), 78 (29.29). HRMS (EI) calcd. for  $\text{C}_{14}\text{H}_{13}\text{NO}_2$ : 227.0946, found: 227.0942.

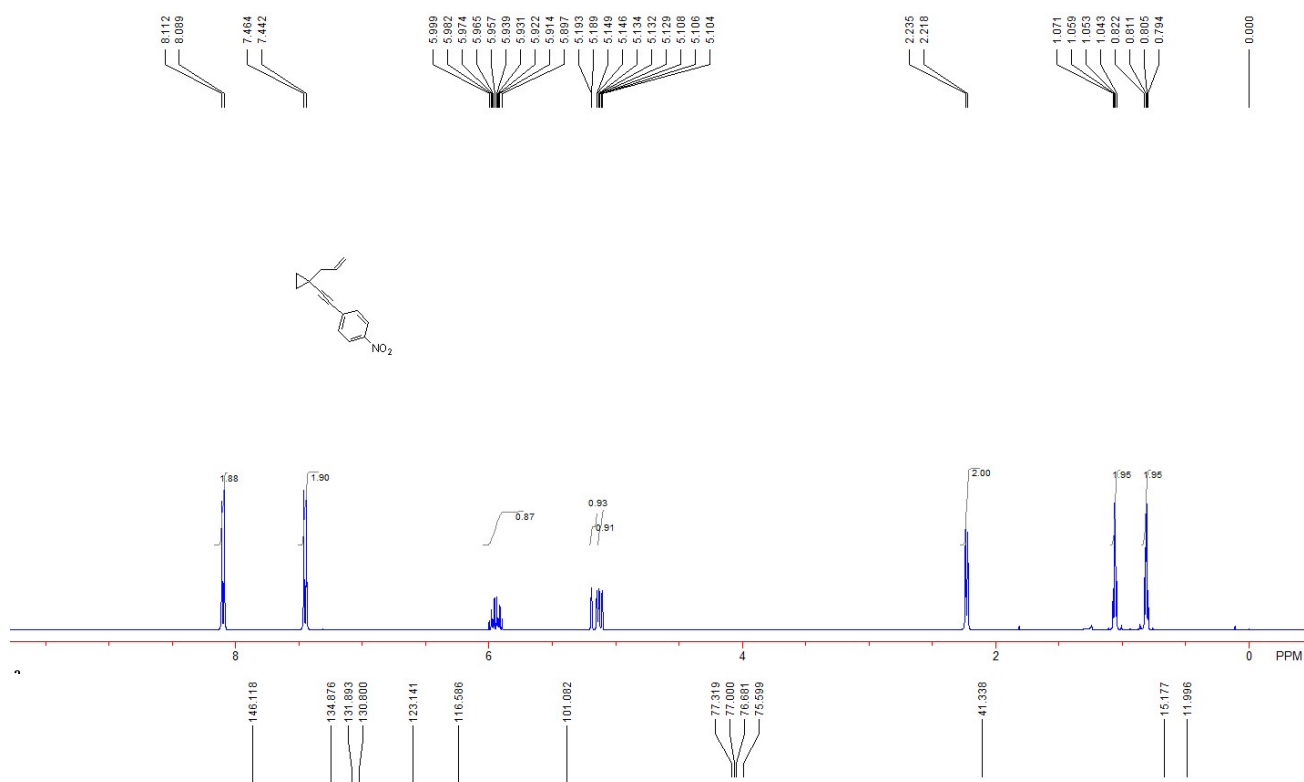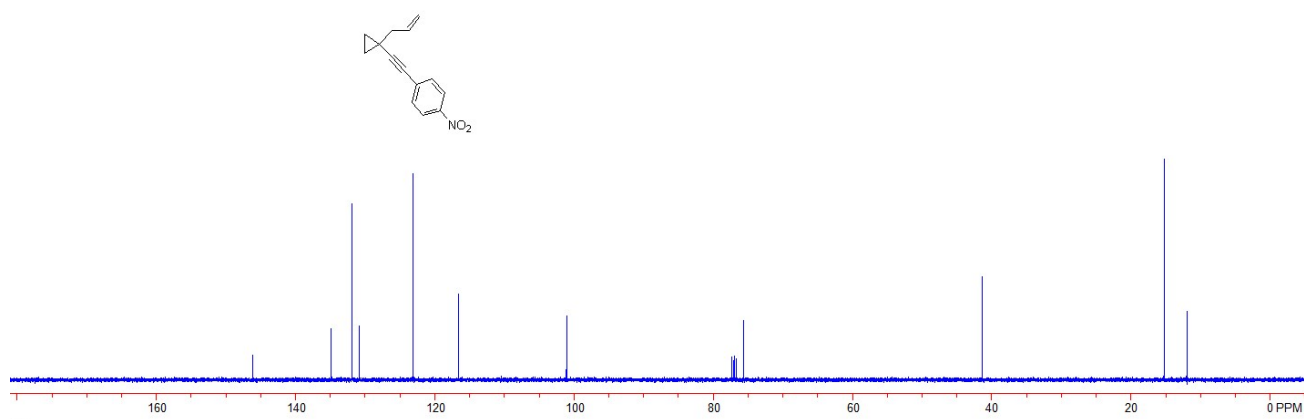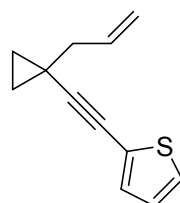

### 2-((1-Allylcyclopropyl)ethynyl)thiophene 11:

0.313 g, yield = 83%. Colorless oil.  $^1\text{H}$  NMR (400 MHz,  $\text{CDCl}_3$ , TMS):  $\delta$  0.73 (dd,  $J_1 = 6.4$  Hz,  $J_2 = 4.4$  Hz, 2H,  $\text{CH}_2$ ), 1.01 (dd,  $J_1 = 6.4$  Hz,  $J_2 = 4.4$  Hz, 2H,  $\text{CH}_2$ ), 2.20 (d,  $J = 6.8$  Hz, 2H,  $\text{CH}_2$ ), 5.09 (d,  $J = 11.2$  Hz, 1H,  $=\text{CH}_2$ ), 5.13 (d,  $J = 17.6$  Hz, 1H,  $=\text{CH}_2$ ), 5.89-5.98 (m, 1H,  $=\text{CH}$ ), 6.89 (dd,  $J_1 =$

5.6 Hz,  $J_2 = 3.6$  Hz, 1H, Ar), 7.08 (d,  $J = 3.6$  Hz, 1H, Ar), 7.12 (d,  $J = 5.6$  Hz, 1H, Ar).  $^{13}\text{C}$  NMR (100 MHz,  $\text{CDCl}_3$ , TMS):  $\delta$  12.1, 15.1, 41.7, 69.9, 98.7, 116.6, 124.0, 125.9, 126.7, 131.1, 135.3. IR ( $\text{CH}_2\text{Cl}_2$ )  $\nu$  3302, 3077, 2927, 1424, 1228, 1094, 915, 838, 695  $\text{cm}^{-1}$ . MS (%)  $m/z$  188 ( $\text{M}^+$ , 68.85), 173 (46.01), 160 (27.55), 147 (100.00), 128 (33.73), 115 (71.44), 103 (43.09), 77 (35.83), 45 (36.38). HRMS (EI) calcd. for  $\text{C}_{12}\text{H}_{12}\text{S}$ : 188.0660, found: 188.0659.

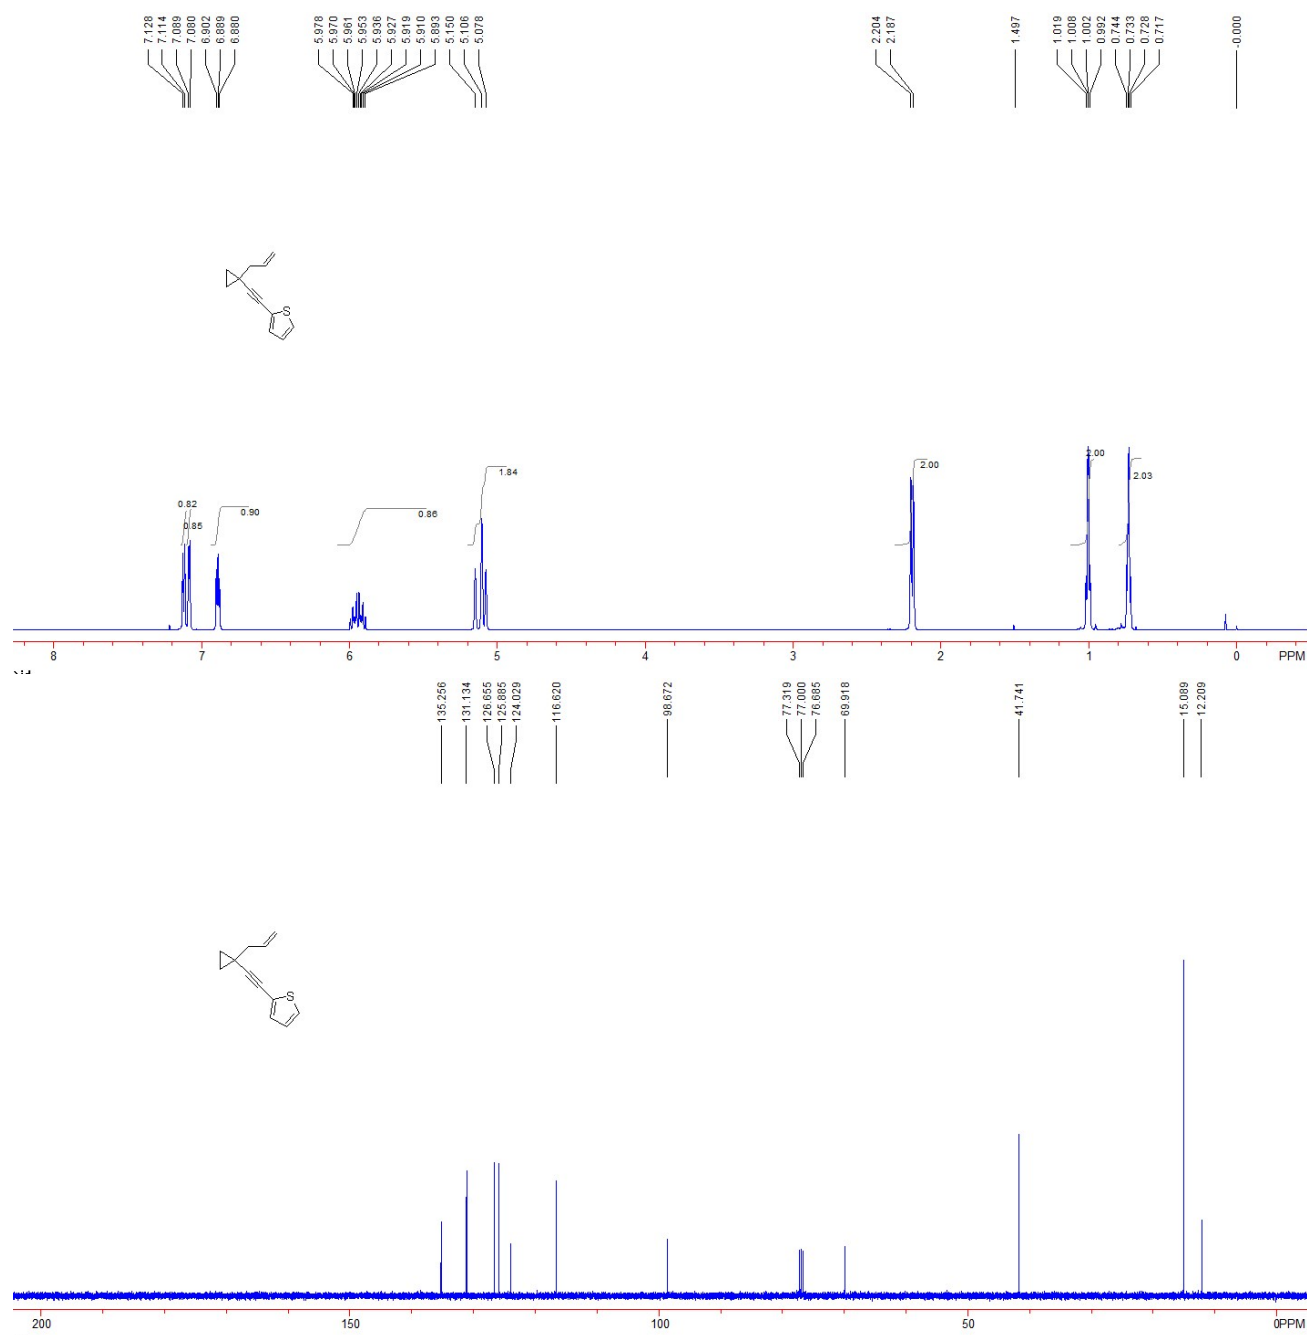

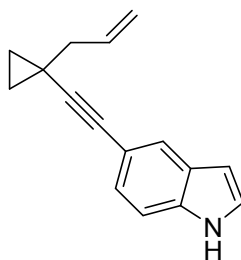

**5-((1-Allylcyclopropyl)ethynyl)-1H-indole 1m':**

0.450 g, yield = 68%. Colorless oil.  $^1\text{H}$  NMR (400 MHz,  $\text{CDCl}_3$ , TMS):  $\delta$  0.71 (dd,  $J_1 = 6.4$  Hz,  $J_2 = 4.4$  Hz, 2H,  $\text{CH}_2$ ), 1.00 (dd,  $J_1 = 6.4$  Hz,  $J_2 = 4.4$  Hz, 2H,  $\text{CH}_2$ ), 2.22 (d,  $J = 6.4$  Hz, 2H,  $\text{CH}_2$ ), 5.08-5.18 (m, 2H,  $=\text{CH}_2$ ), 5.96-6.07 (m, 1H,  $=\text{CH}$ ), 6.43-6.44 (m, 1H, Ar), 7.04-7.07 (m, 1H, Ar), 7.14-7.21 (m, 2H, Ar), 7.70 (s, 1H, Ar), 7.98 (br, 1H, NH).  $^{13}\text{C}$  NMR (100 MHz,  $\text{CDCl}_3$ , TMS):  $\delta$  12.1, 14.9, 42.2, 78.2, 92.0, 102.4, 110.9, 114.8, 116.4, 124.3, 124.9, 125.6, 127.6, 134.9, 135.7. IR ( $\text{CH}_2\text{Cl}_2$ )  $\nu$  3416, 3077, 2921, 1470, 1307, 1054, 909, 763  $\text{cm}^{-1}$ . MS (%)  $m/z$  221 ( $\text{M}^+$ , 100.00), 206 (37.97), 191 (22.70), 180 (76.54), 152 (36.24), 130 (13.65), 117 (9.44), 103 (2.98), 89 (11.96), 77 (12.19). HRMS (EI) calcd. for  $\text{C}_{16}\text{H}_{15}\text{N}$ : 221.1204, found: 221.1202.

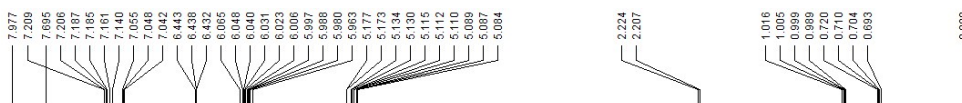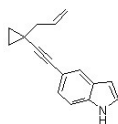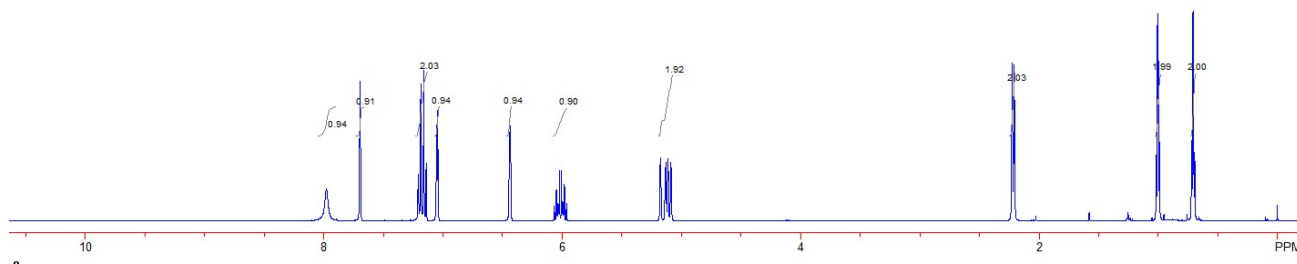

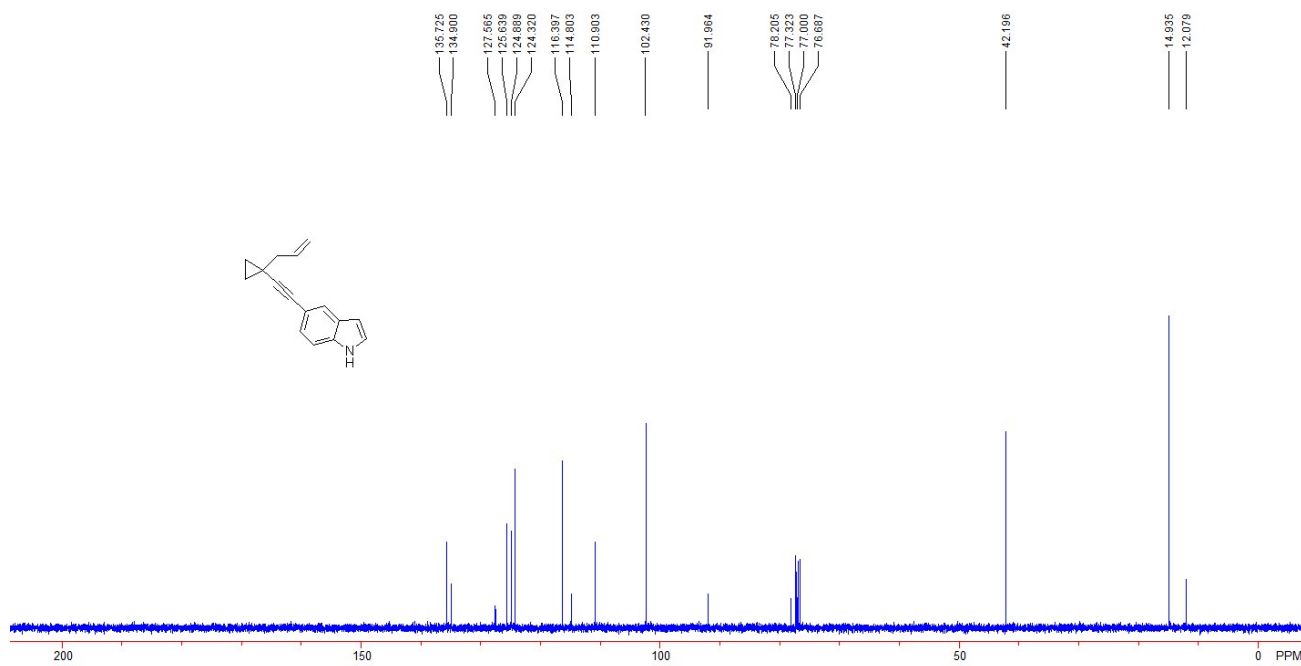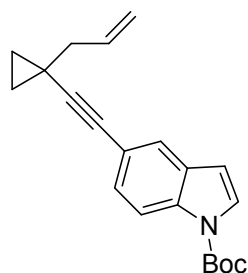

***tert*-Butyl 5-((1-allylcyclopropyl)ethynyl)-1*H*-indole-1-carboxylate 1m:**

0.232 g, yield = 23%. A white solid. Mp: 57-59 °C. <sup>1</sup>H NMR (400 MHz, CDCl<sub>3</sub>, TMS): δ 0.71 (dd,  $J_1 = 6.0$  Hz,  $J_2 = 4.4$  Hz, 2H, CH<sub>2</sub>), 1.01 (dd,  $J_1 = 6.0$  Hz,  $J_2 = 4.4$  Hz, 2H, CH<sub>2</sub>), 1.62 (s, 9H, CH<sub>3</sub>), 2.21 (d,  $J = 6.8$  Hz, 2H, CH<sub>2</sub>), 5.11 (d,  $J = 10.4$  Hz, 1H, =CH<sub>2</sub>), 5.17 (d,  $J = 17.6$  Hz, 1H, =CH<sub>2</sub>), 5.95-6.05 (m, 1H, =CH), 7.33 (d,  $J = 8.4$  Hz, 1H, Ar), 7.53 (d,  $J = 2.0$  Hz, 1H, Ar), 7.58 (s, 1H, Ar), 8.04 (d,  $J = 7.6$  Hz, 1H, Ar). <sup>13</sup>C NMR (100 MHz, CDCl<sub>3</sub>, TMS): δ 12.1, 15.0, 28.1, 42.1, 83.8, 93.1, 107.0, 114.9, 116.5, 118.0, 124.3, 126.5, 127.8, 130.3, 135.6, 149.5. IR (CH<sub>2</sub>Cl<sub>2</sub>) ν 2978, 2930, 1732, 1467, 1365, 1158, 1127, 1022, 836, 724 cm<sup>-1</sup>. HRMS (ESI) Calcd. for C<sub>21</sub>H<sub>24</sub>NO<sub>2</sub> (M<sup>+</sup>+H) requires 322.1802, found: 322.1797.

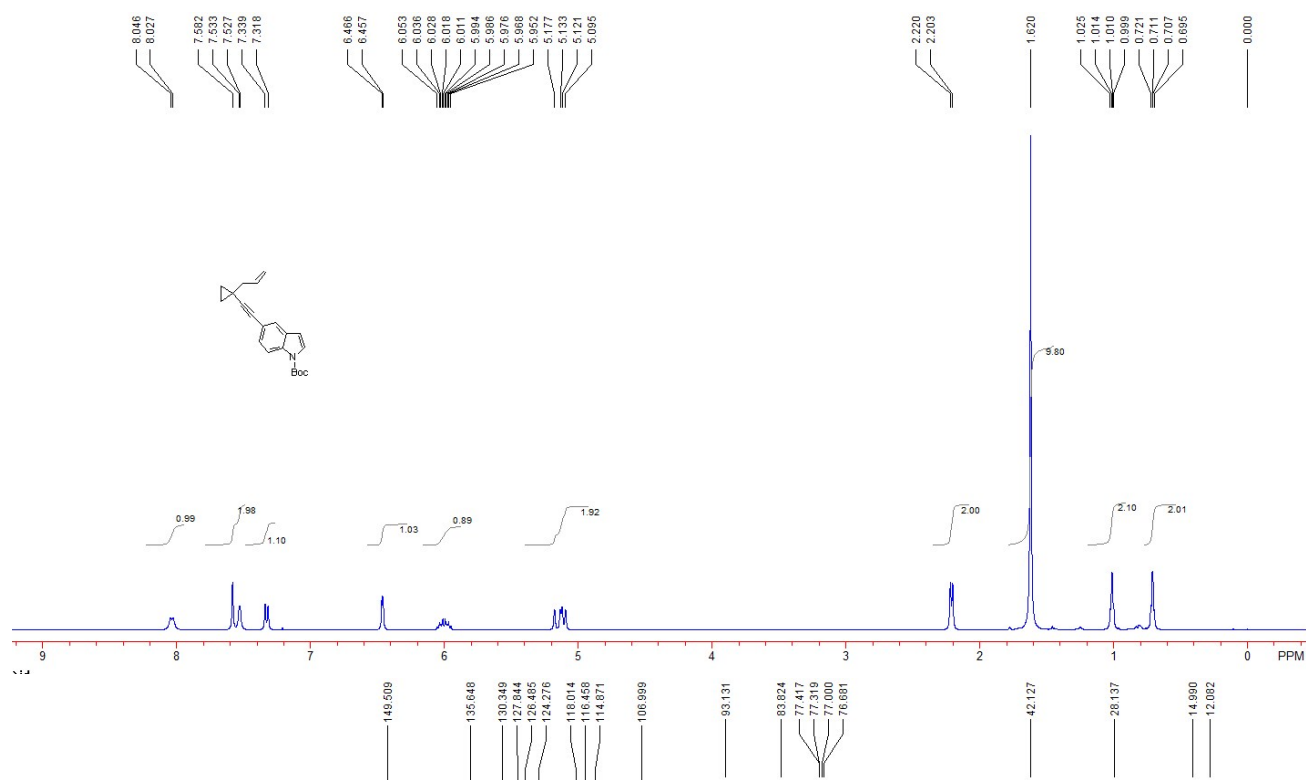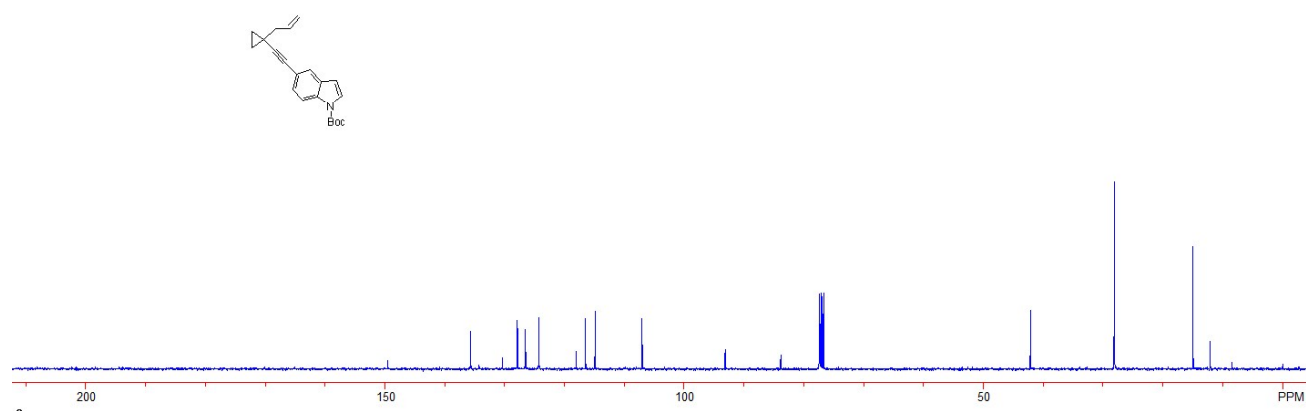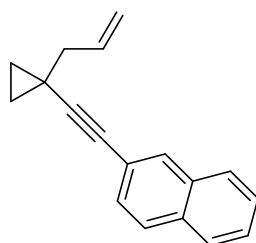

### 2-((1-Allylcyclopropyl)ethynyl)naphthalene 1n:

0.844 g, yield = 91%. Colorless oil. <sup>1</sup>H NMR (400 MHz, CDCl<sub>3</sub>, TMS): δ 0.74 (dd,  $J_1 = 6.4$  Hz,  $J_2 = 4.4$  Hz, 2H, CH<sub>2</sub>), 1.04 (dd,  $J_1 = 6.4$  Hz,  $J_2 = 4.4$  Hz, 2H, CH<sub>2</sub>), 2.29 (d,  $J = 6.8$  Hz, 2H, CH<sub>2</sub>), 5.12 (d,  $J = 10.4$  Hz, 1H, =CH<sub>2</sub>), 5.17 (d,  $J = 17.2$  Hz, 1H, =CH<sub>2</sub>), 5.96-6.06 (m, 1H, =CH), 7.37-7.42 (m,

3H, Ar), 7.67-7.74 (m, 3H, Ar), 7.87 (s, 1H, Ar).  $^{13}\text{C}$  NMR (100 MHz,  $\text{CDCl}_3$ , TMS):  $\delta$  12.1, 15.1, 42.0, 77.4, 95.2, 116.6, 121.2, 126.1, 126.3, 127.5, 127.6, 127.7, 128.8, 131.0, 132.3, 133.0, 135.5. IR ( $\text{CH}_2\text{Cl}_2$ )  $\nu$  3057, 3005, 2218, 1597, 1422, 916, 815, 744  $\text{cm}^{-1}$ . MS (%)  $m/z$  232 ( $\text{M}^+$ , 100.00), 217 (66.44), 202 (71.81), 191 (81.54), 165 (40.50), 152 (20.11), 128 (8.62), 115 (12.58), 101 (22.47). HRMS (EI) calcd. for  $\text{C}_{18}\text{H}_{16}$ : 232.1252, found: 232.1257.

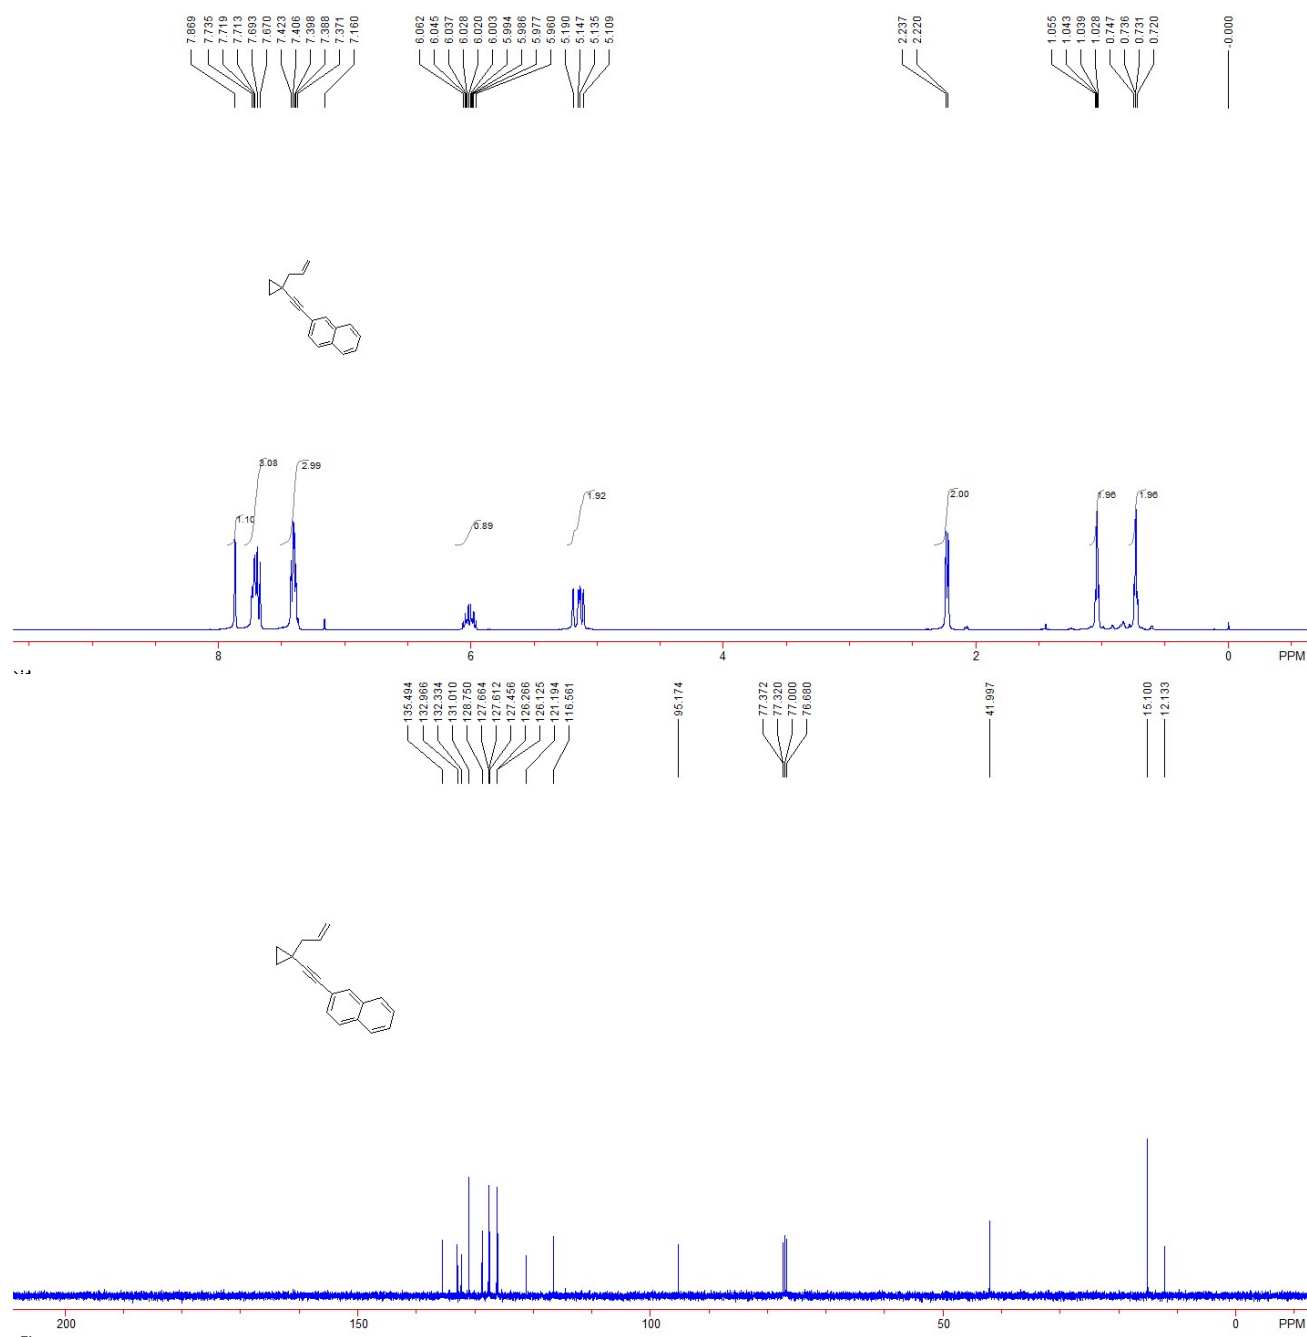

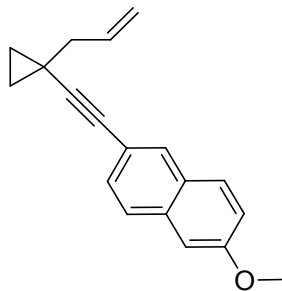

**2-((1-Allylcyclopropyl)ethynyl)-6-methoxynaphthalene 10:**

0.953 g, yield = 91%. A white solid. Mp: 90-93 °C.  $^1\text{H}$  NMR (400 MHz,  $\text{CDCl}_3$ , TMS):  $\delta$  0.75 (dd,  $J_1 = 6.4$  Hz,  $J_2 = 4.4$  Hz, 2H,  $\text{CH}_2$ ), 1.04 (dd,  $J_1 = 6.4$  Hz,  $J_2 = 4.4$  Hz, 2H,  $\text{CH}_2$ ), 2.24 (d,  $J = 6.8$  Hz, 2H,  $\text{CH}_2$ ), 3.89 (s, 3H,  $\text{CH}_3$ ), 5.12 (dd,  $J_1 = 10.4$  Hz,  $J_2 = 0.8$  Hz, 1H,  $=\text{CH}_2$ ), 5.17 (d,  $J = 17.2$  Hz, 1H,  $=\text{CH}_2$ ), 5.97-6.05 (m, 1H,  $=\text{CH}$ ), 7.06 (d,  $J = 2.0$  Hz, 1H, Ar), 7.11 (dd,  $J_1 = 8.8$  Hz,  $J_2 = 2.4$  Hz, 1H, Ar), 7.38-7.40 (m, 1H, Ar), 7.60 (d,  $J = 8.8$  Hz, 1H, Ar), 7.64 (d,  $J = 8.8$  Hz, 1H, Ar), 7.80 (s, 1H, Ar).  $^{13}\text{C}$  NMR (100 MHz,  $\text{CDCl}_3$ , TMS):  $\delta$  12.1, 15.1, 42.1, 55.2, 77.4, 94.3, 105.7, 116.5, 118.8, 119.1, 126.5, 128.5, 129.1, 130.9, 133.6, 135.6, 157.9. IR ( $\text{CH}_2\text{Cl}_2$ )  $\nu$  3059, 2922, 2849, 1629, 1601, 1498, 1388, 1265, 1031, 850, 806  $\text{cm}^{-1}$ . MS (%)  $m/z$  262 ( $\text{M}^+$ , 100.00), 247 (24.61), 231 (19.16), 221 (62.69), 189 (32.20), 178 (40.62), 163 (24.07), 152 (20.32), 139 (9.58), 115 (7.05). HRMS (EI) calcd. for  $\text{C}_{19}\text{H}_{18}\text{O}$ : 262.1358, found: 262.1353.

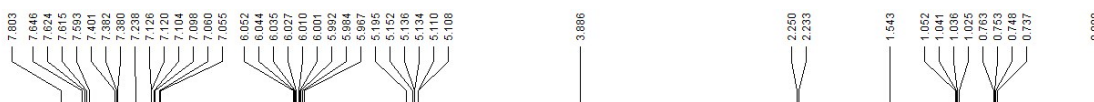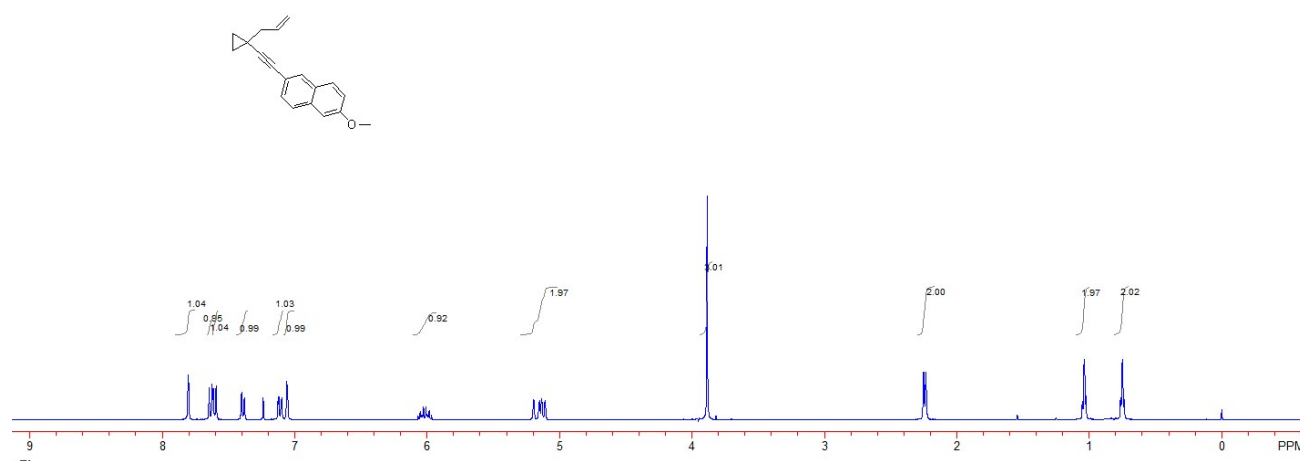

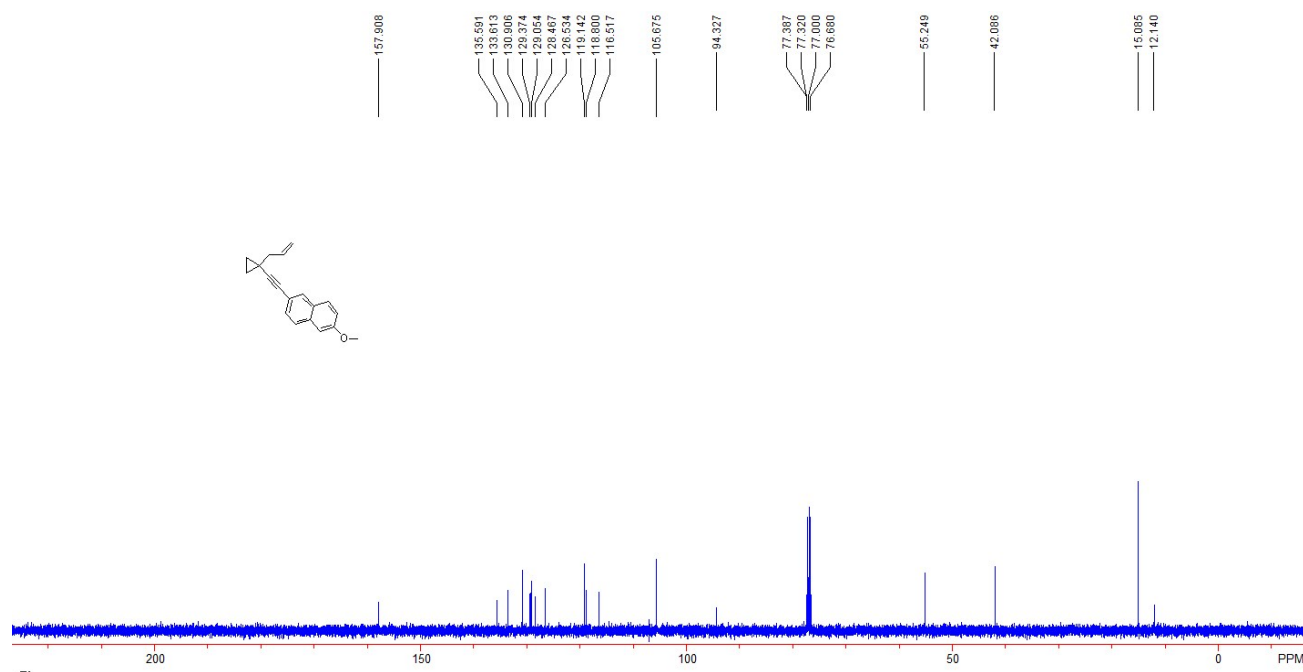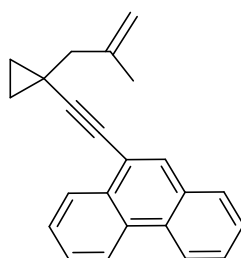

**9-((1-(2-Methylallyl)cyclopropyl)ethynyl)phenanthrene 1p:**

0.897 g, yield = 61%. Colorless oil. <sup>1</sup>H NMR (400 MHz, CDCl<sub>3</sub>, TMS): δ 0.80-0.86 (m, 2H, CH<sub>2</sub>), 1.18 (dd, *J*<sub>1</sub> = 6.4 Hz, *J*<sub>2</sub> = 4.4 Hz, 2H, CH<sub>2</sub>), 1.92 (s, 3H, CH<sub>3</sub>), 2.24 (s, 2H, CH<sub>2</sub>), 4.94 (s, 1H, =CH<sub>2</sub>), 5.04 (s, 1H, =CH<sub>2</sub>), 7.46-7.57 (m, 2H, Ar), 7.58-7.62 (m, 2H, Ar), 7.72-7.74 (m, 1H, Ar), 7.85 (s, 1H, Ar), 8.44 (dd, *J*<sub>1</sub> = 6.4 Hz, *J*<sub>2</sub> = 3.2 Hz, 1H, Ar), 8.50-8.56 (m, 2H, Ar). <sup>13</sup>C NMR (100 MHz, CDCl<sub>3</sub>, TMS): δ 11.6, 16.1, 22.9, 46.0, 75.0, 99.8, 112.4, 120.3, 122.5, 122.6, 126.71, 126.75, 126.9, 127.1, 128.1, 129.8, 130.0, 130.9, 131.3, 131.5, 143.7. IR (CH<sub>2</sub>Cl<sub>2</sub>) ν 3073, 2967, 2915, 2217, 1649, 1450, 1380, 888, 746, 723 cm<sup>-1</sup>. MS (%) *m/z* 296 (M<sup>+</sup>, 96.33), 281 (90.81), 266 (56.90), 253 (67.80), 239 (100.00), 226 (40.74), 215 (37.02), 202 (22.89), 165 (9.27), 126 (14.46). HRMS (EI) calcd. for C<sub>23</sub>H<sub>20</sub>: 296.1565, found: 296.1570.

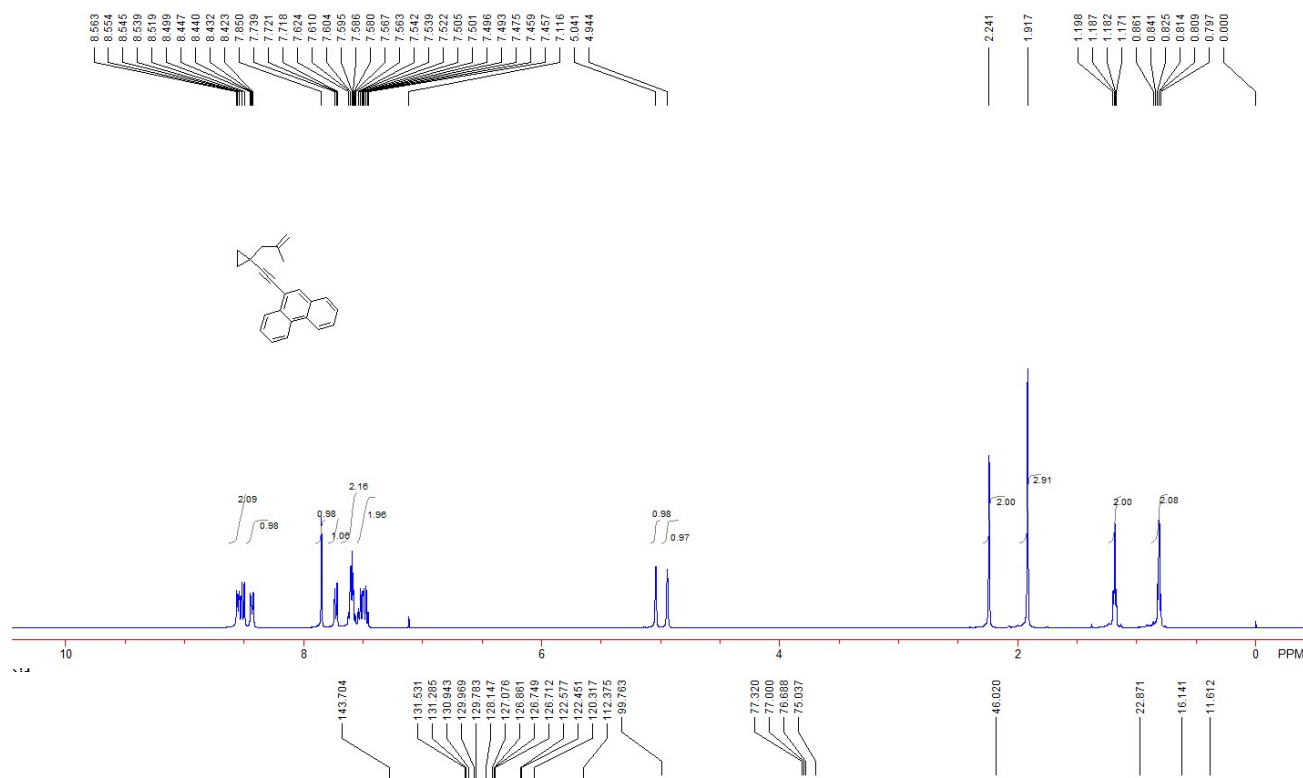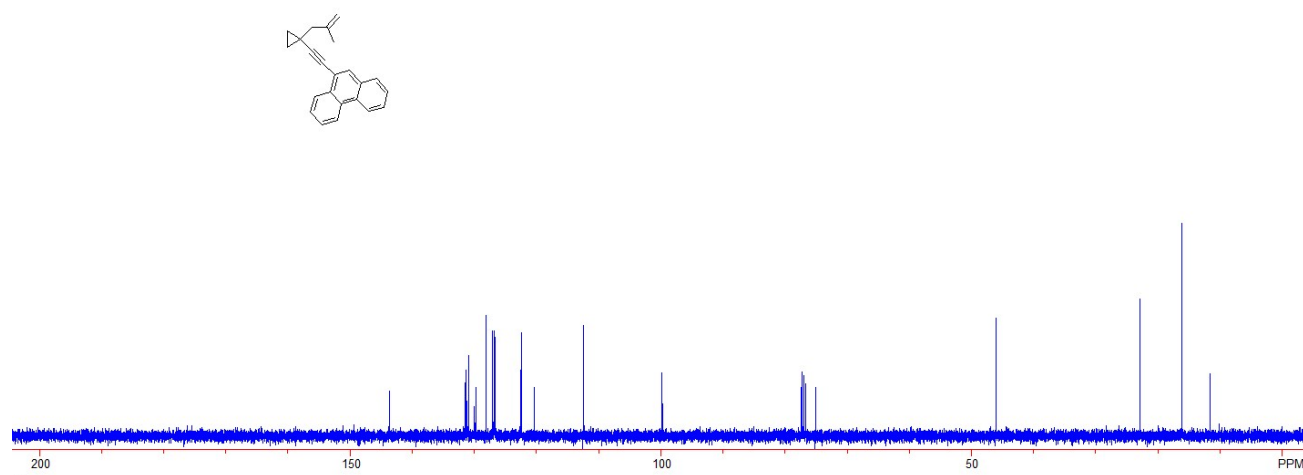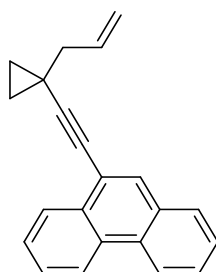

**9-((1-Allylcyclopropyl)ethynyl)phenanthrene 2a:**

0.757 g, yield = 93%. A white solid. Mp: 60-62 °C. <sup>1</sup>H NMR (400 MHz, CDCl<sub>3</sub>, TMS): δ 0.79 (dd,  $J_1 = 6.8$  Hz,  $J_2 = 4.4$  Hz, 2H, CH<sub>2</sub>), 1.13 (dd,  $J_1 = 6.8$  Hz,  $J_2 = 4.4$  Hz, 2H, CH<sub>2</sub>), 2.29 (d,  $J = 6.8$  Hz,

2H, CH<sub>2</sub>), 5.16-5.26 (m, 2H, =CH<sub>2</sub>), 6.04-6.11 (m, 1H, =CH), 7.46-7.49 (m, 2H, Ar), 7.53-7.63 (m, 2H, Ar), 7.87 (s, 1H, Ar), 8.41-8.43 (m, 1H, Ar), 8.50-8.56 (m, 2H, Ar). <sup>13</sup>C NMR (100 MHz, CDCl<sub>3</sub>, TMS): δ 12.4, 15.4, 42.1, 75.2, 99.6, 116.7, 120.2, 122.5, 122.6, 126.7, 126.8, 126.9, 127.0, 128.2, 129.8, 130.0, 131.1, 131.3, 131.5, 135.6. IR (CH<sub>2</sub>Cl<sub>2</sub>) ν 3074, 3005, 2900, 2217, 1451, 915, 746, 723 cm<sup>-1</sup>. MS (%) m/z 282 (M<sup>+</sup>, 100.00), 267 (35.68), 252 (54.98), 239 (82.16), 226 (31.43), 215 (22.58), 202 (14.84), 126 (15.99), 113 (11.97). HRMS (EI) calcd. for C<sub>22</sub>H<sub>18</sub>: 282.1409, found: 282.1412.

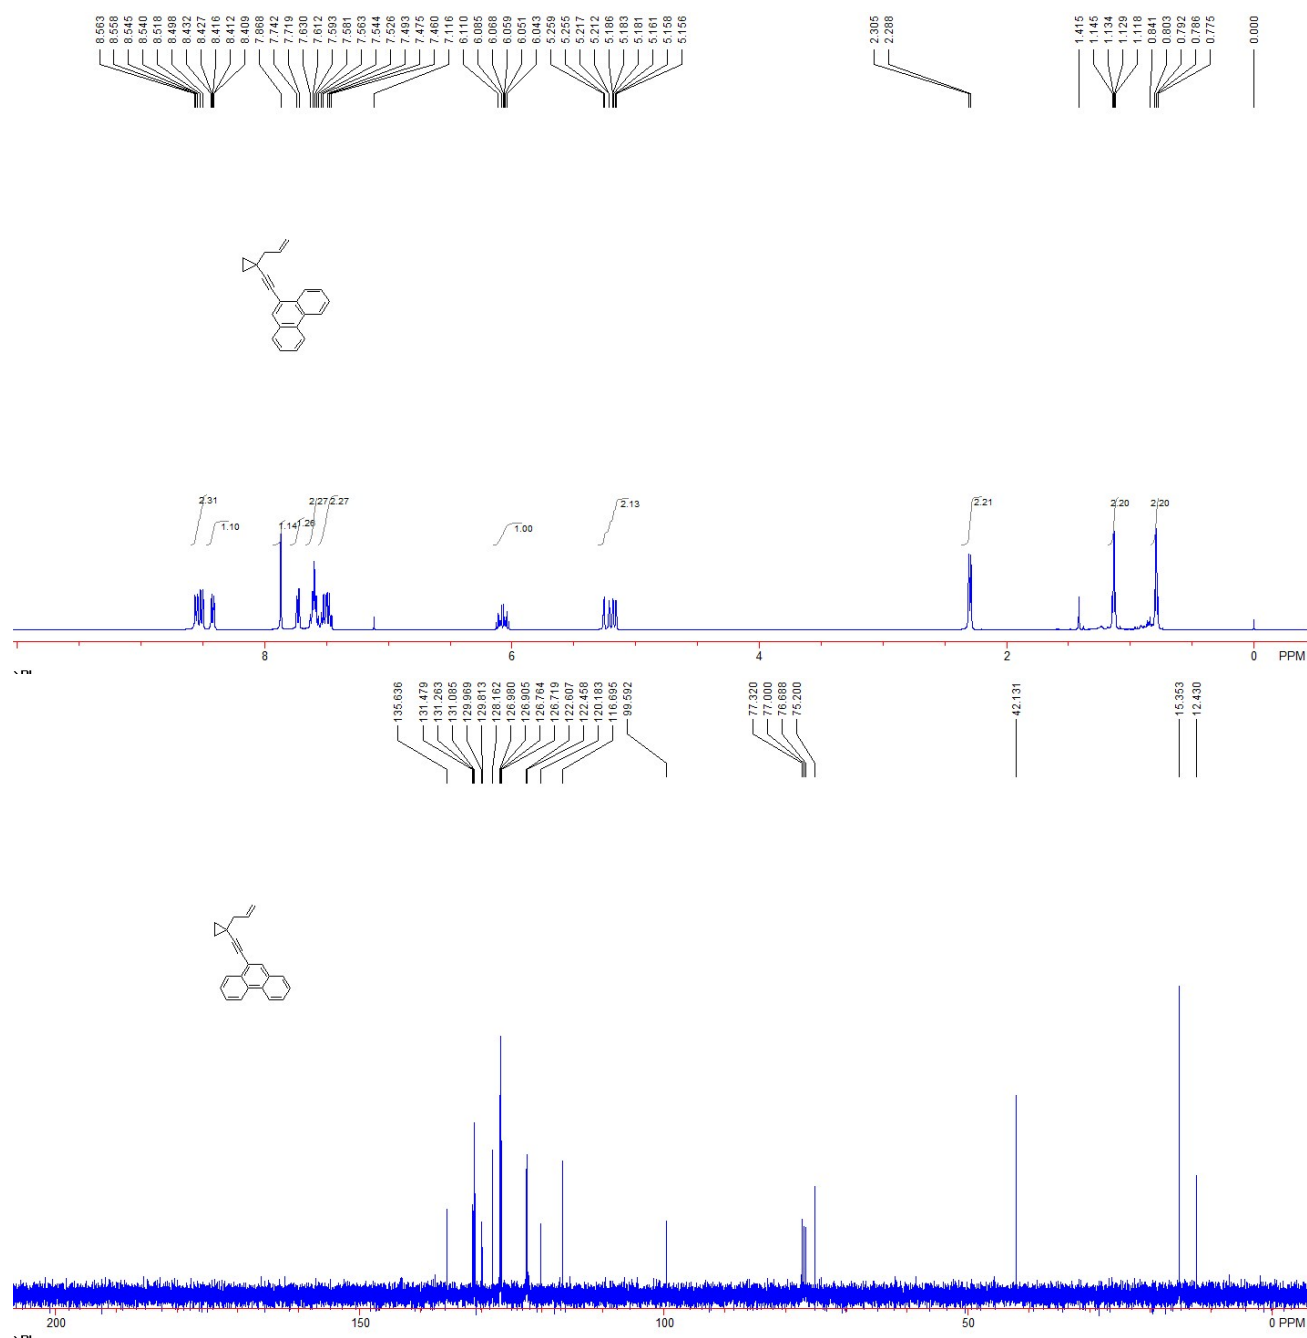

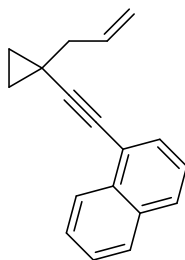

**1-((1-Allylcyclopropyl)ethynyl)naphthalene 2b:**

0.757 g, yield = 93%. Colorless oil.  $^1\text{H}$  NMR (400 MHz,  $\text{CDCl}_3$ , TMS):  $\delta$  0.75 (dd,  $J_1 = 6.0$  Hz,  $J_2 = 4.4$  Hz, 2H,  $\text{CH}_2$ ), 1.10 (dd,  $J_1 = 6.0$  Hz,  $J_2 = 4.4$  Hz, 2H,  $\text{CH}_2$ ), 2.26 (d,  $J = 6.8$  Hz, 2H,  $\text{CH}_2$ ), 5.15 (d,  $J = 10.4$  Hz, 1H,  $=\text{CH}_2$ ), 5.21 (d,  $J = 17.2$  Hz, 1H,  $=\text{CH}_2$ ), 6.00-6.10 (m, 1H,  $=\text{CH}$ ), 7.28-7.32 (m, 1H, Ar), 7.42 (dd,  $J_1 = 7.6$  Hz,  $J_2 = 7.2$  Hz, 1H, Ar), 7.48-7.52 (m, 1H, Ar), 7.57 (d,  $J = 7.2$  Hz, 1H, Ar), 7.67 (d,  $J = 8.0$  Hz, 1H, Ar), 7.74 (d,  $J = 8.0$  Hz, 1H, Ar), 8.33 (d,  $J = 7.2$  Hz, 1H, Ar).  $^{13}\text{C}$  NMR (100 MHz,  $\text{CDCl}_3$ , TMS):  $\delta$  12.4, 15.3, 42.1, 75.0, 99.9, 116.6, 121.5, 125.1, 126.1, 126.2, 126.4, 127.7, 128.1, 129.9, 133.1, 133.5, 135.6. IR ( $\text{CH}_2\text{Cl}_2$ )  $\nu$  3058, 3005, 2901, 1641, 1398, 996, 915, 797, 771  $\text{cm}^{-1}$ . MS (%)  $m/z$  232 ( $\text{M}^+$ , 100.00), 217 (51.12), 202 (77.32), 189 (89.58), 176 (29.02), 165 (36.71), 152 (25.87), 126 (7.43), 101 (30.64). HRMS (EI) calcd. for  $\text{C}_{18}\text{H}_{16}$ : 232.1252, found: 232.1253.

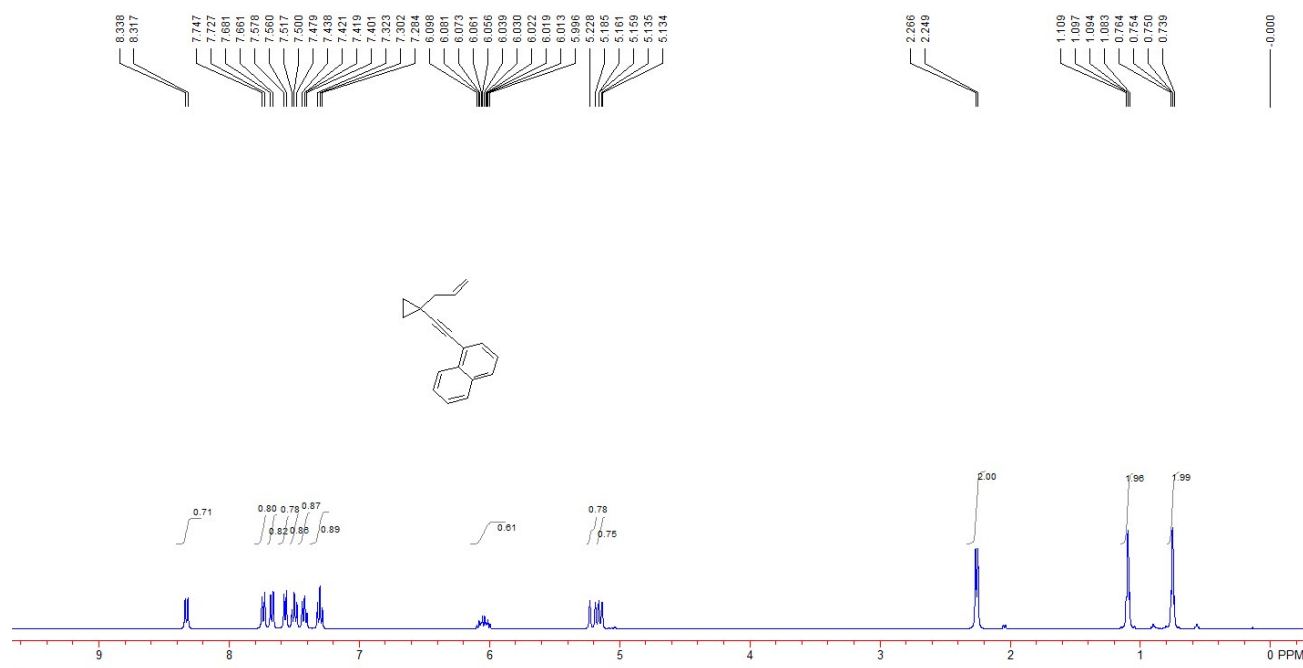

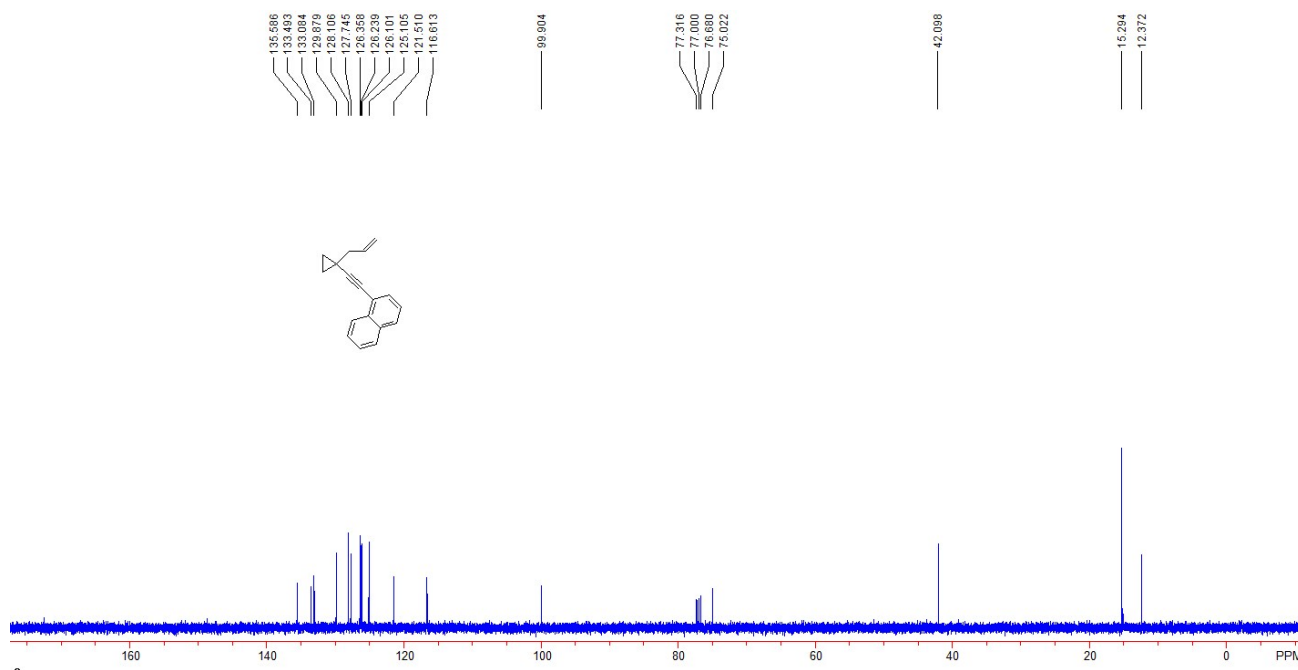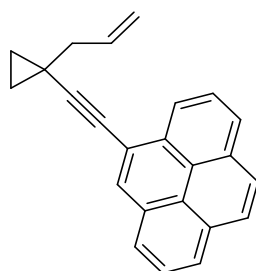

#### 4-((1-Allylcyclopropyl)ethynyl)pyrene 2c:

0.858 g, yield = 70%. A white solid. Mp: 95-98 °C. <sup>1</sup>H NMR (400 MHz, CDCl<sub>3</sub>, TMS): δ 0.87 (dd,  $J_1 = 6.8$  Hz,  $J_2 = 4.4$  Hz, 2H, CH<sub>2</sub>), 1.20 (dd,  $J_1 = 6.8$  Hz,  $J_2 = 4.4$  Hz, 2H, CH<sub>2</sub>), 2.37 (d,  $J = 7.2$  Hz, 2H, CH<sub>2</sub>), 5.20-5.31 (m, 2H, =CH<sub>2</sub>), 6.10-6.17 (m, 1H, =CH), 7.94-7.99 (m, 3H, Ar), 8.01-8.02 (m, 2H, Ar), 8.08-8.16 (m, 3H, Ar), 8.51 (d,  $J = 8.8$  Hz, 1H, Ar). <sup>13</sup>C NMR (100 MHz, CDCl<sub>3</sub>, TMS): δ 12.6, 15.5, 42.3, 76.1, 100.8, 116.7, 118.7, 124.4, 125.2, 125.7, 126.0, 127.2, 127.6, 127.9, 129.5, 130.5, 131.1, 131.2, 131.9, 135.7. IR (CH<sub>2</sub>Cl<sub>2</sub>) ν 3040, 2921, 2850, 2214, 1434, 915, 841, 716 cm<sup>-1</sup>. MS (%) m/z 306 (M<sup>+</sup>, 100.00), 291 (21.83), 276 (36.76), 263 (47.49), 250 (24.38), 239 (19.26), 145 (7.49), 138 (14.77), 125 (7.42). HRMS (EI) calcd. for C<sub>24</sub>H<sub>18</sub>: 306.1409, found: 306.1408.

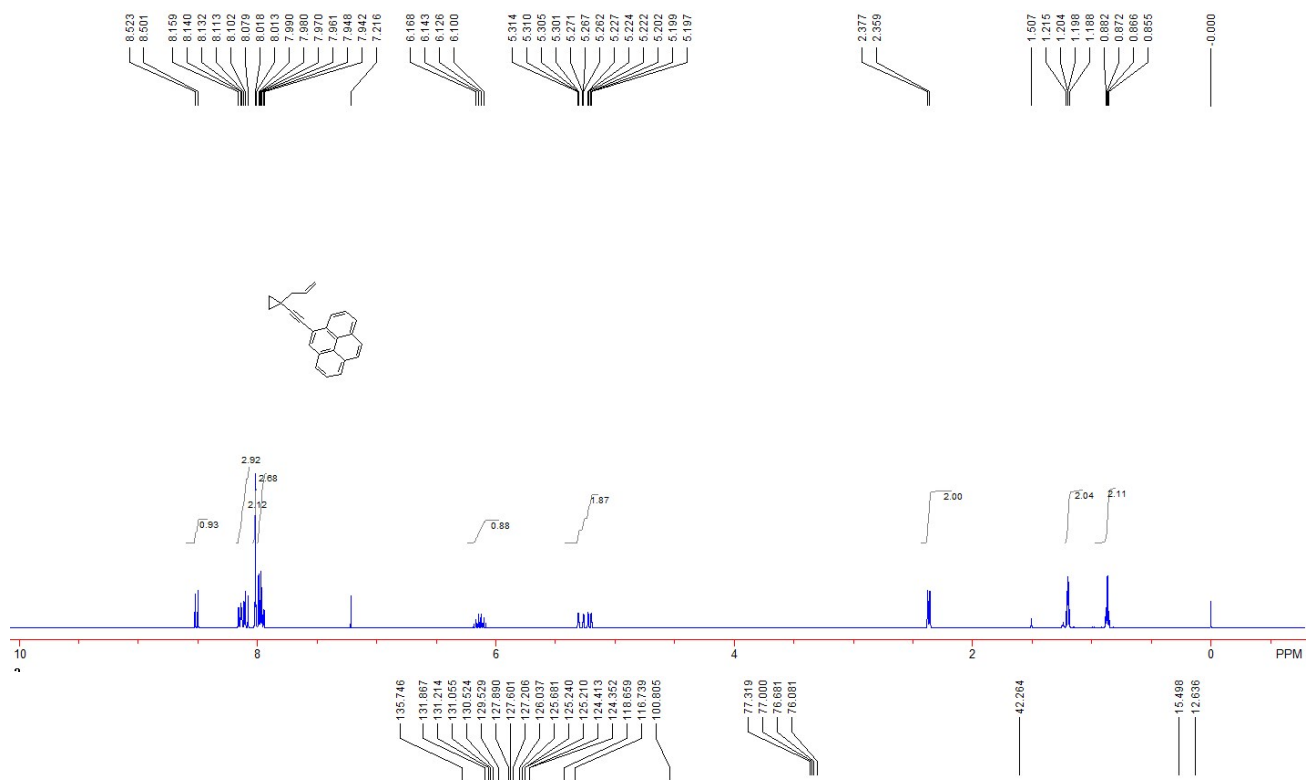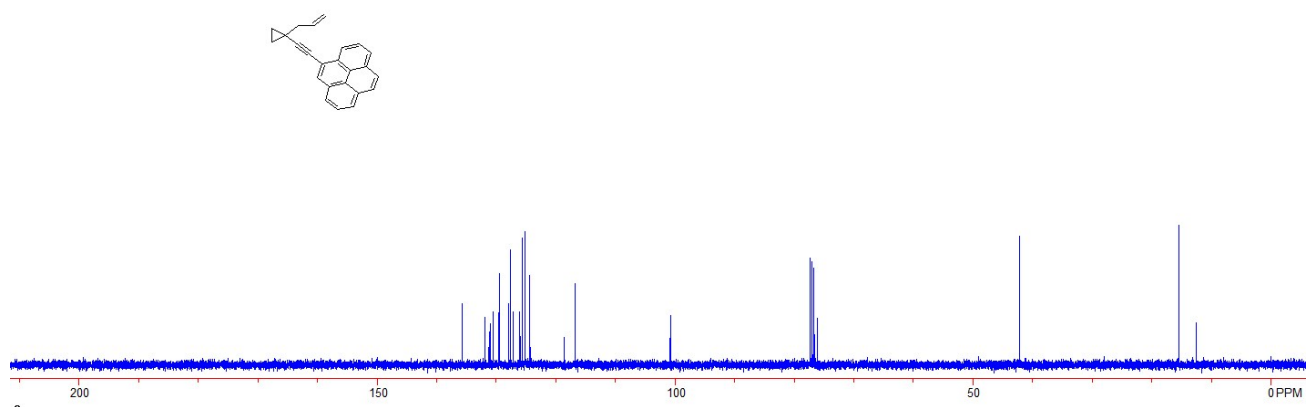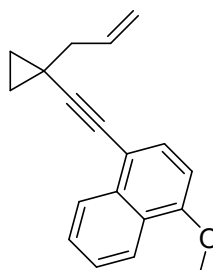

**1-((1-Allylcyclopropyl)ethynyl)-4-methoxynaphthalene 2d:**

0.910 g, yield = 87%. Colorless oil. <sup>1</sup>H NMR (400 MHz, CDCl<sub>3</sub>, TMS): δ 0.79 (dd,  $J_1 = 6.8$  Hz,  $J_2 = 4.4$  Hz, 2H, CH<sub>2</sub>), 1.10 (dd,  $J_1 = 6.8$  Hz,  $J_2 = 4.4$  Hz, 2H, CH<sub>2</sub>), 2.29 (d,  $J = 6.8$  Hz, 2H, CH<sub>2</sub>), 3.95 (s,

3H, CH<sub>3</sub>), 5.13-5.24 (m, 2H, =CH<sub>2</sub>), 6.04-6.10 (m, 1H, =CH), 6.86 (d, *J* = 8.4 Hz, 2H, Ar), 7.45-7.57 (m, 3H, Ar), 8.25 (dd, *J*<sub>1</sub> = 9.6 Hz, *J*<sub>2</sub> = 9.2 Hz, 2H, Ar). <sup>13</sup>C NMR (100 MHz, CDCl<sub>3</sub>, TMS): δ 12.4, 15.2, 42.3, 55.5, 75.0, 97.9, 103.4, 113.6, 116.5, 122.1, 125.3, 125.5, 126.1, 126.9, 130.4, 134.4, 135.8, 155.2. IR (CH<sub>2</sub>Cl<sub>2</sub>) ν 3066, 3004, 2839, 2220, 1583, 1317, 1094, 914, 762 cm<sup>-1</sup>. MS (%) *m/z* 262 (M<sup>+</sup>, 100.00), 247 (24.24), 231 (32.69), 221 (37.61), 203 (16.85), 189 (32.74), 178 (27.08), 163 (18.82), 152 (16.34), 139 (8.38), 115 (6.44). HRMS (EI) calcd. for C<sub>19</sub>H<sub>18</sub>O: 262.1358, found: 262.1355.

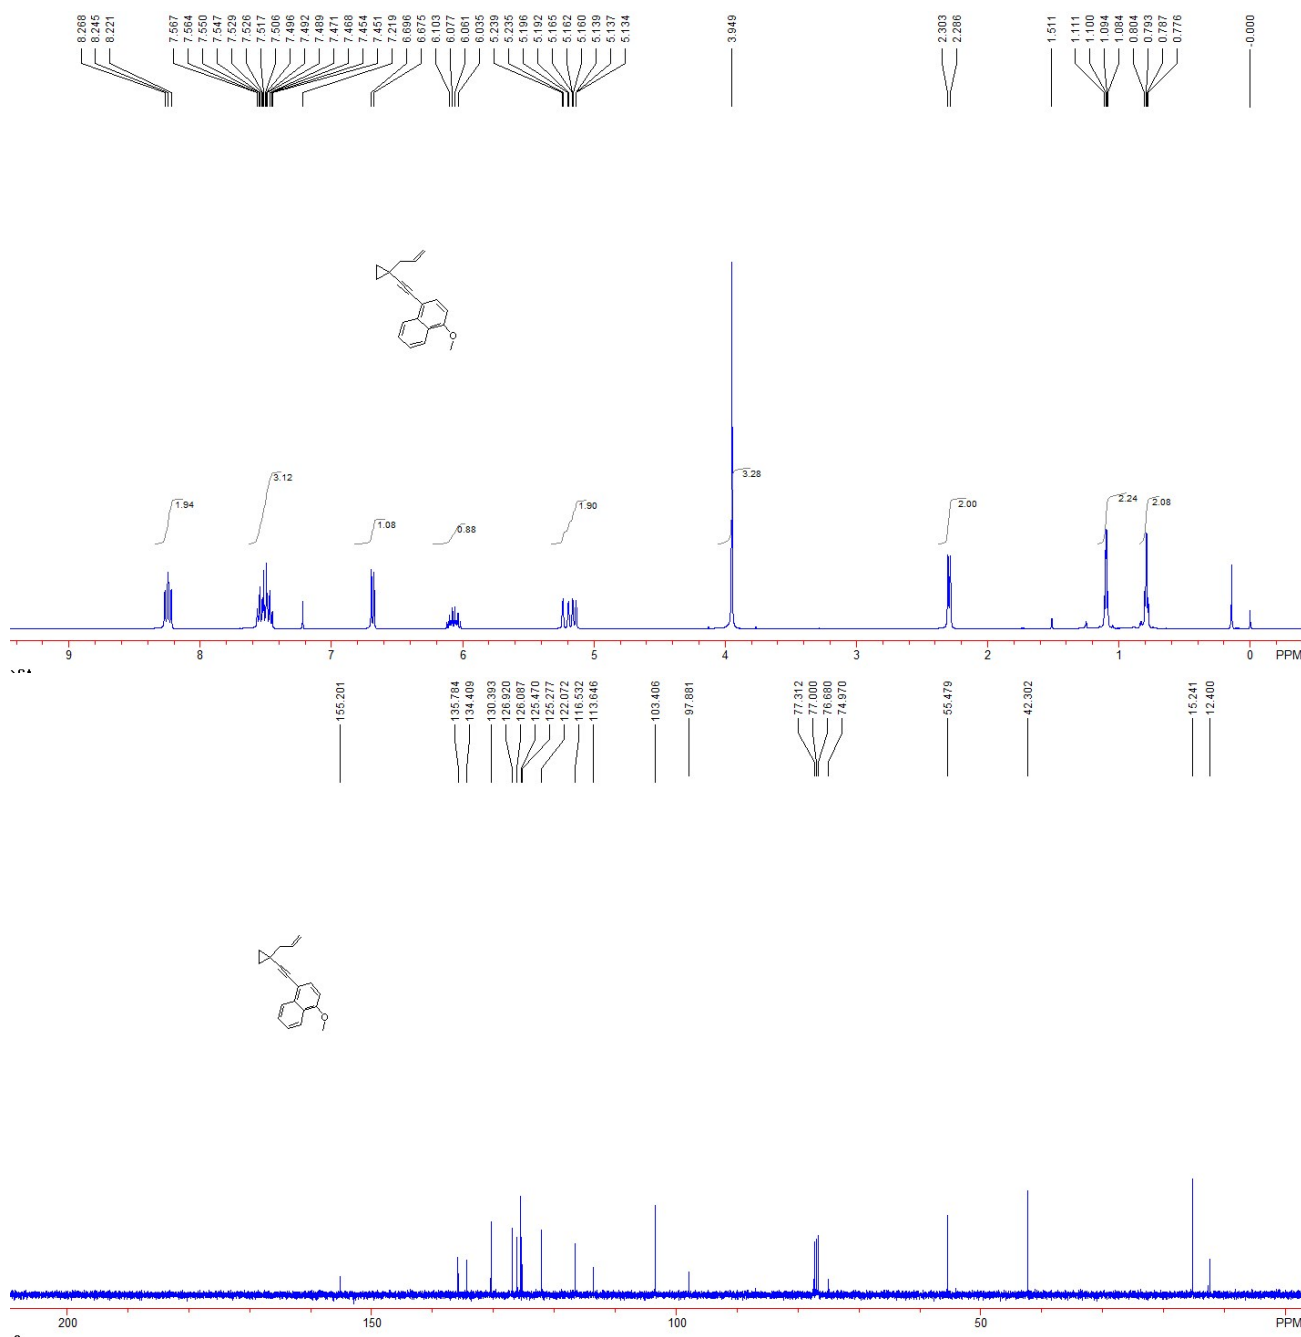

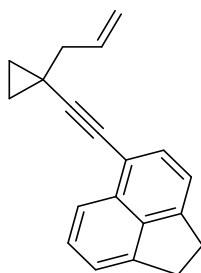

**5-((1-Allylcyclopropyl)ethynyl)-1,2-dihydroacenaphthylene 2e:**

0.758 g, yield = 73%. A white solid. Mp: 65-67 °C.  $^1\text{H}$  NMR (400 MHz,  $\text{CDCl}_3$ , TMS):  $\delta$  0.78 (dd,  $J_1 = 6.4$  Hz,  $J_2 = 4.4$  Hz, 2H,  $\text{CH}_2$ ), 1.10 (dd,  $J_1 = 6.4$  Hz,  $J_2 = 4.4$  Hz, 2H,  $\text{CH}_2$ ), 2.28 (d,  $J = 6.8$  Hz, 2H,  $\text{CH}_2$ ), 3.28-3.34 (m, 4H,  $\text{CH}_2$ ), 5.14 (d,  $J = 10.0$  Hz, 1H,  $=\text{CH}_2$ ), 5.21 (dd,  $J_1 = 17.2$  Hz,  $J_2 = 1.6$  Hz, 1H,  $\text{CH}_2$ ), 6.01-6.12 (m, 1H,  $=\text{CH}$ ), 7.13 (d,  $J = 7.2$  Hz, 1H, Ar), 7.24 (d,  $J = 6.8$  Hz, 1H, Ar), 7.44-7.51 (m, 2H, Ar), 7.85 (d,  $J = 8.4$  Hz, 1H, Ar).  $^{13}\text{C}$  NMR (100 MHz,  $\text{CDCl}_3$ , TMS):  $\delta$  12.4, 15.3, 30.3, 30.4, 42.3, 74.8, 98.4, 116.5, 118.8, 119.6, 121.1, 128.2, 131.6, 132.0, 135.7, 138.8, 146.0. IR ( $\text{CH}_2\text{Cl}_2$ )  $\nu$  3061, 2920, 2836, 2217, 1607, 1422, 913, 836, 774  $\text{cm}^{-1}$ . MS (%)  $m/z$  258 ( $\text{M}^+$ , 100.00), 243 (28.91), 229 (29.53), 217 (39.03), 202 (60.77), 189 (24.67), 152 (10.40), 113 (6.94), 101 (10.68). HRMS (EI) calcd. for  $\text{C}_{20}\text{H}_{18}$ : 258.1409, found: 258.1411.

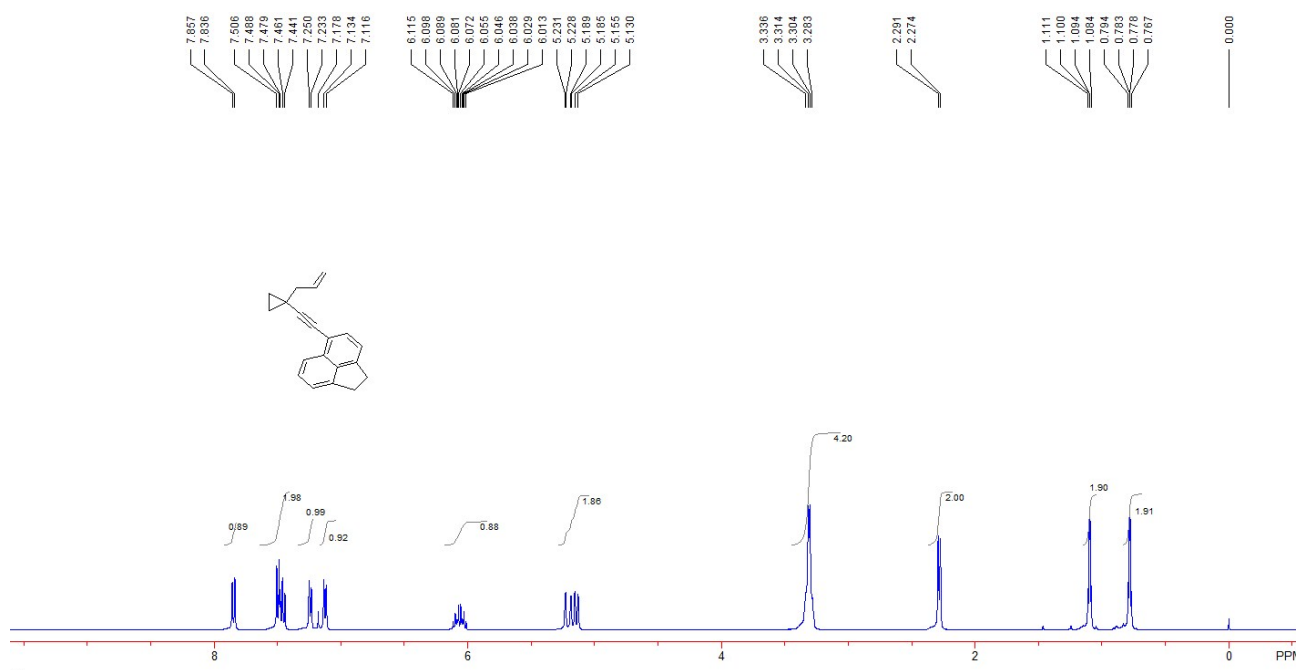

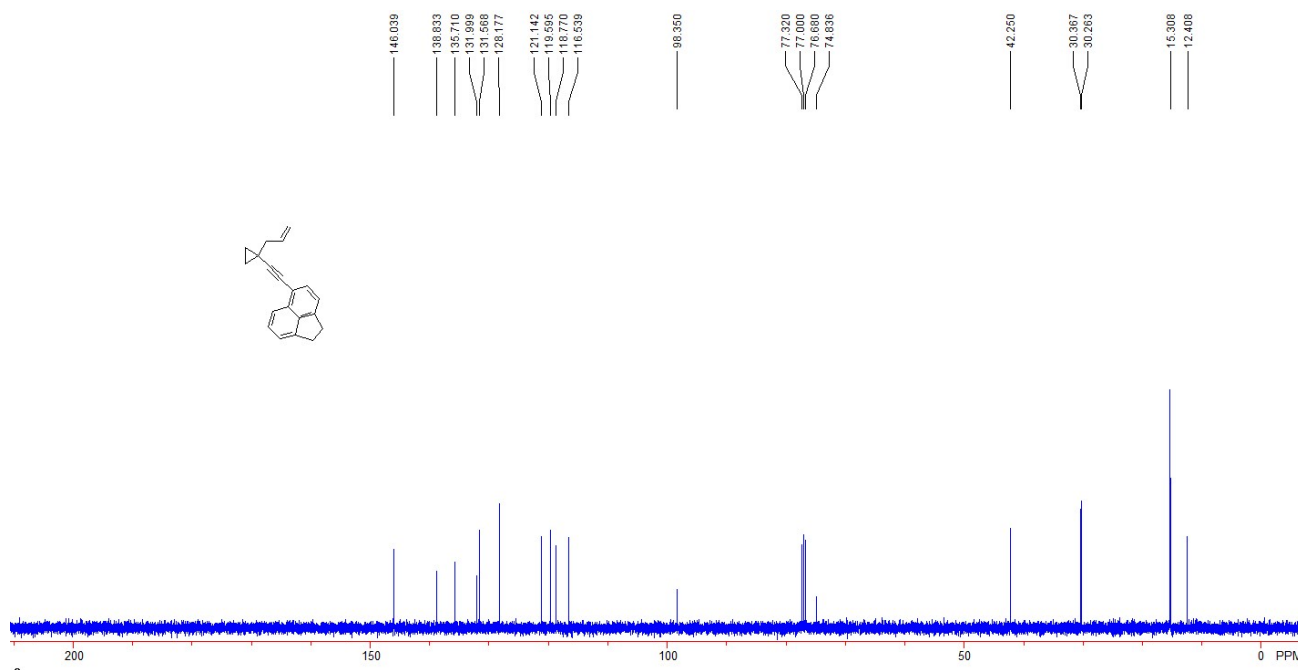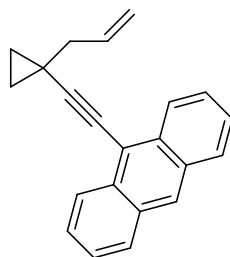

### 9-((1-Allylcyclopropyl)ethynyl)anthracene 2f:

0.913 g, yield =81%. A white solid. Mp: 49-51 °C. <sup>1</sup>H NMR (400 MHz, CDCl<sub>3</sub>, TMS): δ 0.90 (dd,  $J_1 = 6.4$  Hz,  $J_2 = 4.4$  Hz, 2H, CH<sub>2</sub>), 1.24 (dd,  $J_1 = 6.4$  Hz,  $J_2 = 4.4$  Hz, 2H, CH<sub>2</sub>), 2.39 (d,  $J = 6.8$  Hz, 2H, CH<sub>2</sub>), 5.20-5.23 (m, 1H, =CH<sub>2</sub>), 5.27-5.33 (m, 1H, =CH<sub>2</sub>), 6.10-6.18 (m, 1H, =CH), 7.42-7.46 (m, 2H, Ar), 7.49-7.53 (m, 2H, Ar), 7.93 (dd,  $J_1 = 8.0$  Hz,  $J_2 = 0.4$  Hz, 2H, Ar), 8.29 (s, 1H, Ar), 8.50 (dd,  $J_1 = 8.0$  Hz,  $J_2 = 0.8$  Hz, 2H, Ar). <sup>13</sup>C NMR (100 MHz, CDCl<sub>3</sub>, TMS): δ 12.9, 15.8, 42.3, 106.7, 116.8, 118.2, 125.5, 126.1, 126.5, 126.9, 128.5, 131.1, 132.6, 135.8. IR (CH<sub>2</sub>Cl<sub>2</sub>) ν 3053, 3004, 2922, 2211, 1440, 1417, 916, 843, 734 cm<sup>-1</sup>. MS (%) m/z 282 (M<sup>+</sup>, 100.00), 267 (23.44), 252 (33.29), 239 (52.21), 226 (39.38), 215 (19.37), 126 (12.47), 113 (11.18). HRMS (EI) calcd. for C<sub>22</sub>H<sub>18</sub>: 282.1409, found: 282.1415.

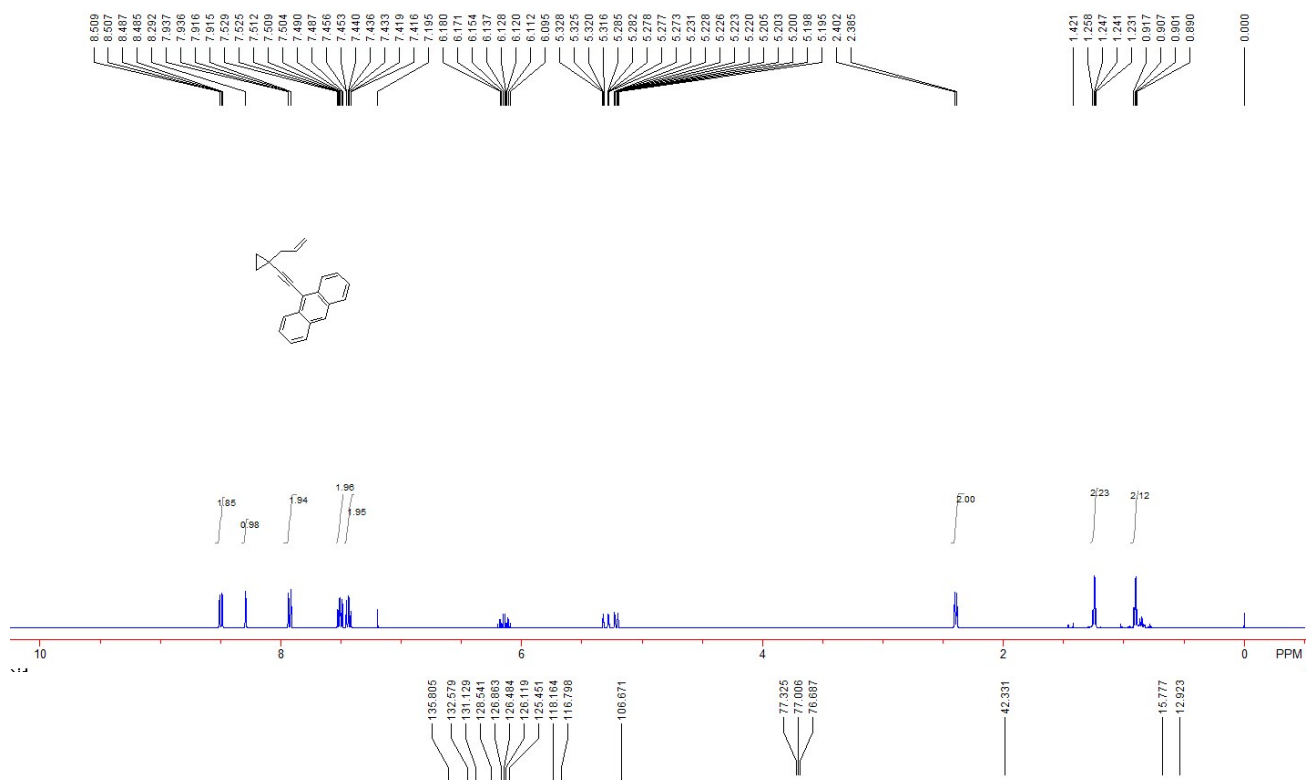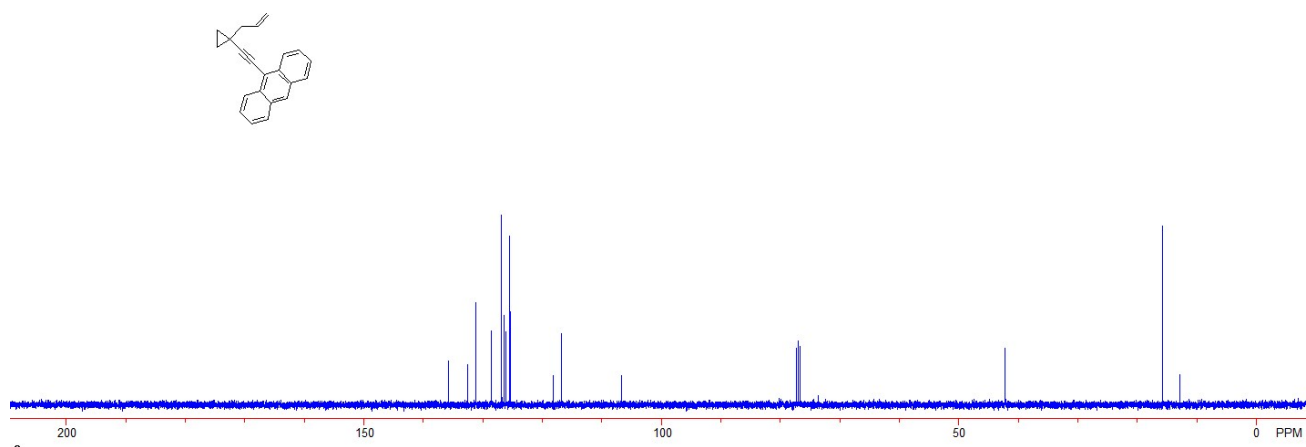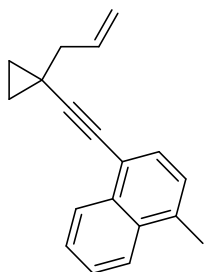

**1-((1-Allylcyclopropyl)ethynyl)-4-methylnaphthalene 2g:**

0.853 g, yield = 87%. Colorless oil. <sup>1</sup>H NMR (400 MHz, CDCl<sub>3</sub>, TMS): δ 0.79 (dd,  $J_1 = 6.8$  Hz,  $J_2 = 4.4$  Hz, 2H, CH<sub>2</sub>), 1.10 (dd,  $J_1 = 6.8$  Hz,  $J_2 = 4.4$  Hz, 2H, CH<sub>2</sub>), 2.29 (d,  $J = 6.8$  Hz, 2H, CH<sub>2</sub>), 2.62 (s,

3H, CH<sub>3</sub>), 5.13-5.24 (m, 2H, =CH<sub>2</sub>), 6.03-6.10 (m, 1H, =CH), 7.18 (d,  $J = 7.2$  Hz, 1H, Ar), 7.46-7.54 (m, 3H, Ar), 7.93 (dd,  $J_1 = 7.2$  Hz,  $J_2 = 2.0$  Hz, 1H, Ar), 8.35 (dd,  $J_1 = 6.8$  Hz,  $J_2 = 1.6$  Hz, 1H, Ar). <sup>13</sup>C NMR (100 MHz, CDCl<sub>3</sub>, TMS):  $\delta$  12.4, 15.3, 19.5, 42.2, 75.2, 99.2, 116.6, 119.8, 124.3, 125.95, 126.02, 126.9, 129.7, 132.3, 133.5, 134.4, 135.7. IR (CH<sub>2</sub>Cl<sub>2</sub>)  $\nu$  3077, 3006, 2922, 1580, 1421, 1394, 915, 830, 758 cm<sup>-1</sup>. MS (%)  $m/z$  246 (M<sup>+</sup>, 100.00), 231 (71.87), 216 (43.72), 202 (47.21), 189 (78.84), 179 (13.55), 165 (17.25), 152 (8.75), 101 (16.13), 94 (3.61). HRMS (EI) calcd. for C<sub>19</sub>H<sub>18</sub>: 246.1409, found: 246.1406.

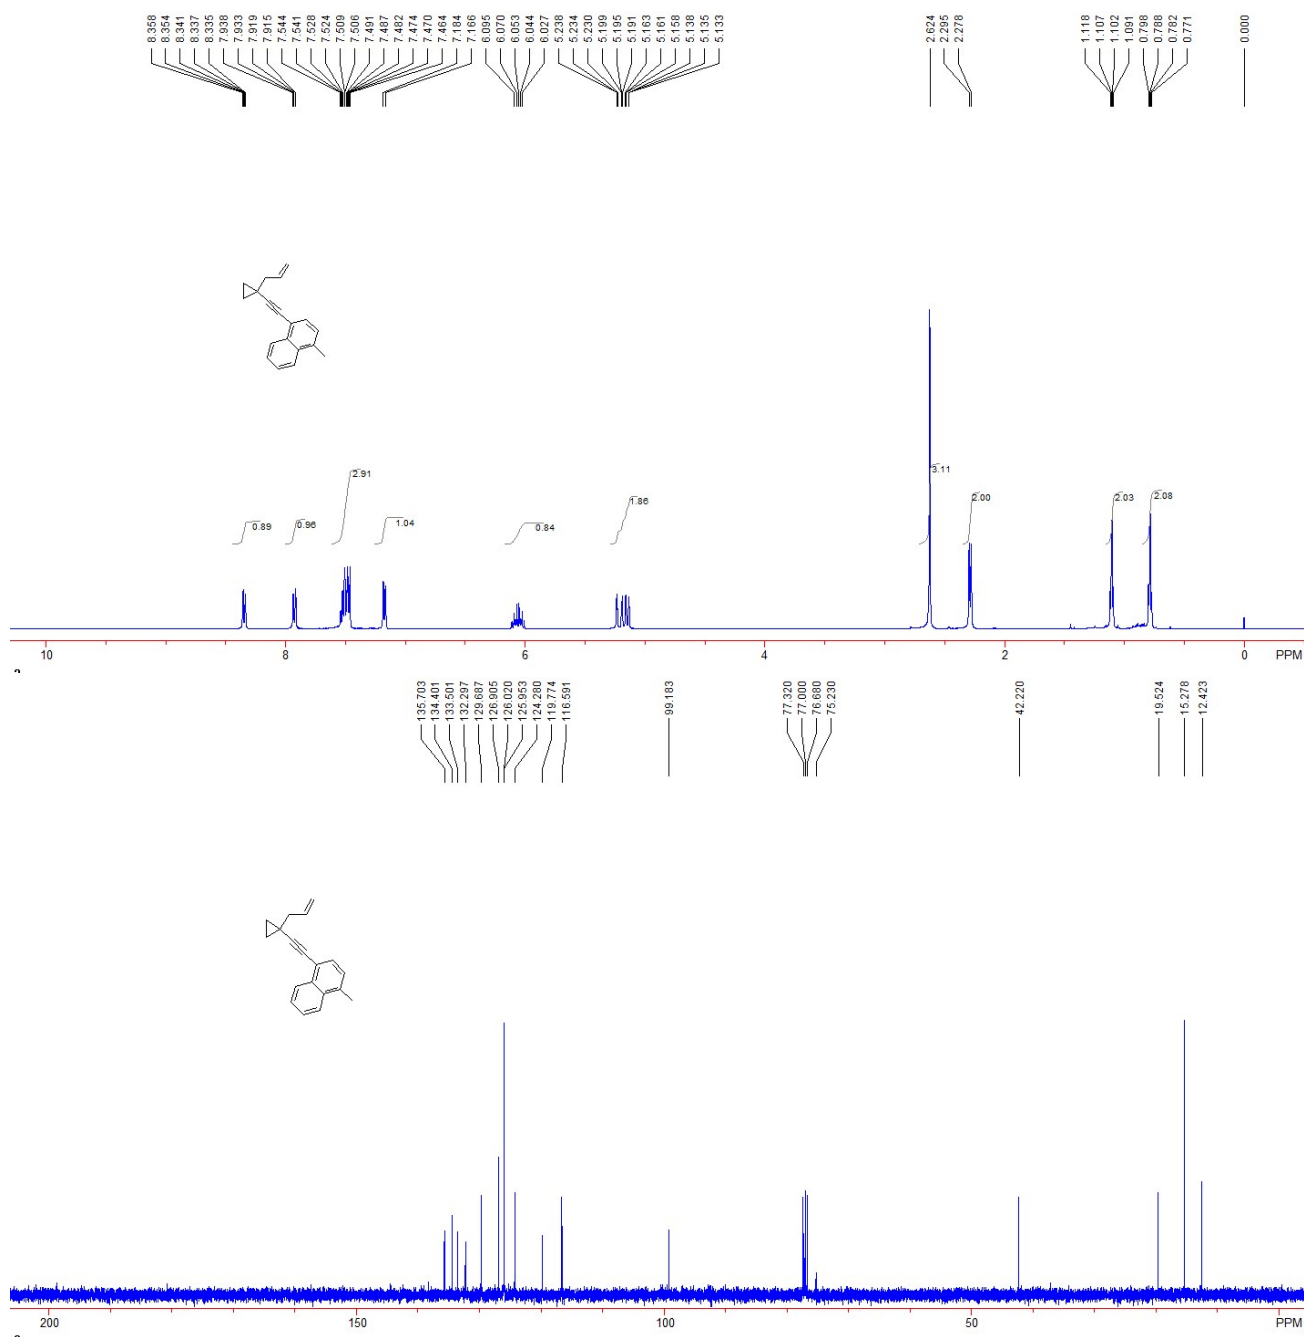

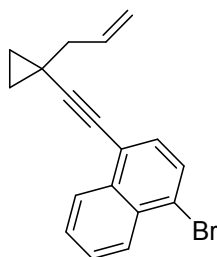

**1-((1-Allylcyclopropyl)ethynyl)-4-bromonaphthalene 2h:**

1.059 g, yield = 85%. Colorless oil.  $^1\text{H}$  NMR (400 MHz,  $\text{CDCl}_3$ , TMS):  $\delta$  0.81 (dd,  $J_1 = 6.4$  Hz,  $J_2 = 4.4$  Hz, 2H,  $\text{CH}_2$ ), 1.12 (dd,  $J_1 = 6.4$  Hz,  $J_2 = 4.4$  Hz, 2H,  $\text{CH}_2$ ), 2.30 (d,  $J = 6.8$  Hz, 2H,  $\text{CH}_2$ ), 5.14-5.25 (m, 2H,  $=\text{CH}_2$ ), 5.99-6.10 (m, 1H,  $=\text{CH}$ ), 7.38 (d,  $J = 7.6$  Hz, 1H, Ar), 7.53-7.59 (m, 2H, Ar), 7.65 (d,  $J = 7.6$  Hz, 1H, Ar), 8.17-8.21 (m, 1H, Ar), 8.29-8.32 (m, 1H, Ar).  $^{13}\text{C}$  NMR (100 MHz,  $\text{CDCl}_3$ , TMS):  $\delta$  12.4, 15.4, 42.0, 74.5, 101.1, 116.7, 121.7, 122.4, 126.9, 127.2, 127.4, 127.5, 129.3, 129.9, 131.6, 134.5, 135.5. IR ( $\text{CH}_2\text{Cl}_2$ )  $\nu$  3077, 3004, 2924, 2220, 1501, 1384, 943, 828, 759  $\text{cm}^{-1}$ . MS (%)  $m/z$  310 ( $\text{M}^+$ , 40.10), 295 (6.88), 269 (17.14), 231 (33.33), 215 (67.47), 202 (59.98), 189 (100.00), 176 (17.17), 163 (19.86), 101 (25.48). HRMS (EI) calcd. for  $\text{C}_{18}\text{H}_{15}\text{Br}$ : 310.0357, found: 310.0362.

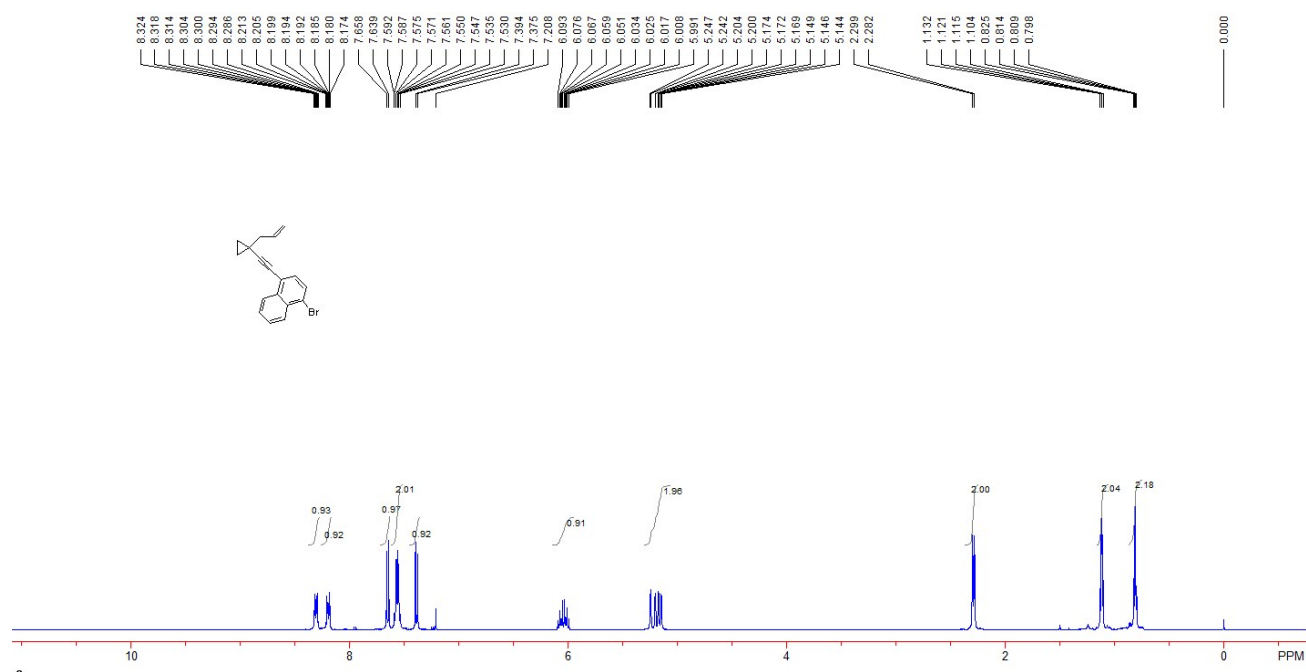

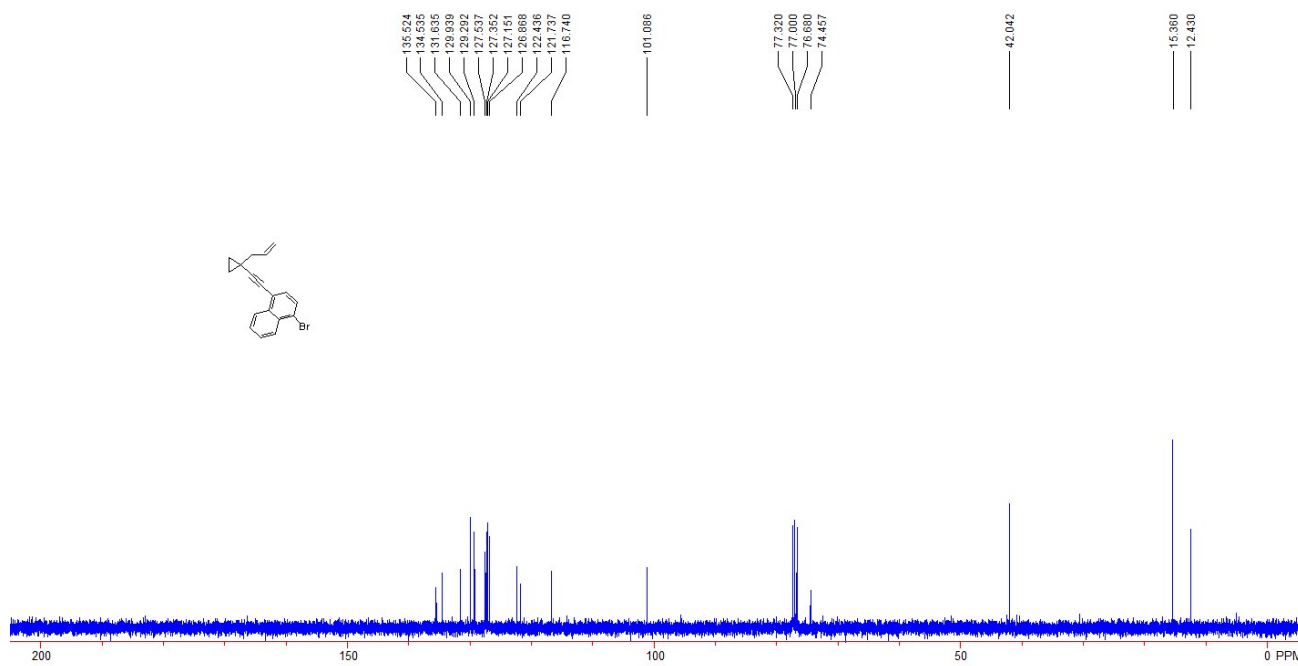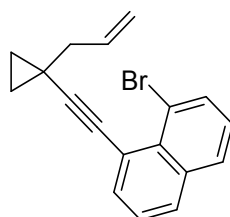

**1-((1-Allylcyclopropyl)ethynyl)-8-bromonaphthalene 2i:**

0.979 mg, yield = 79%. Colorless oil. <sup>1</sup>H NMR (400 MHz, CDCl<sub>3</sub>, TMS): δ 0.74 (dd, *J*<sub>1</sub> = 6.8 Hz, *J*<sub>2</sub> = 4.4 Hz, 2H, CH<sub>2</sub>), 1.12 (dd, *J*<sub>1</sub> = 6.8 Hz, *J*<sub>2</sub> = 4.4 Hz, 2H, CH<sub>2</sub>), 2.28 (d, *J* = 6.4 Hz, 2H, CH<sub>2</sub>), 5.11 (d, *J* = 10.4 Hz, 1H, =CH<sub>2</sub>), 5.18 (dd, *J*<sub>1</sub> = 17.2 Hz, *J*<sub>2</sub> = 1.6 Hz, 1H, =CH<sub>2</sub>), 6.01-6.08 (m, 1H, =CH), 7.16-7.22 (m, 1H, Ar), 7.30-7.34 (m, 1H, Ar), 7.67-7.72 (m, 3H, Ar), 7.74-7.78 (m, 1H, Ar). <sup>13</sup>C NMR (100 MHz, CDCl<sub>3</sub>, TMS): δ 12.8, 14.3, 41.5, 76.7, 103.2, 116.4, 120.6, 121.6, 125.5, 126.1, 128.9, 129.0, 130.6, 133.6, 135.6, 135.8. IR (CH<sub>2</sub>Cl<sub>2</sub>) ν 3058, 3003, 2213, 1557, 1195, 815, 755 cm<sup>-1</sup>. MS (%) *m/z* 310 (M<sup>+</sup>, 28.34), 231 (55.82), 215 (72.96), 202 (66.48), 189 (100.00), 176 (15.88), 163 (19.88), 150 (9.62), 101 (26.83), 88 (15.90). HRMS (EI) calcd. for C<sub>18</sub>H<sub>15</sub>Br: 310.0357, found: 310.0364.

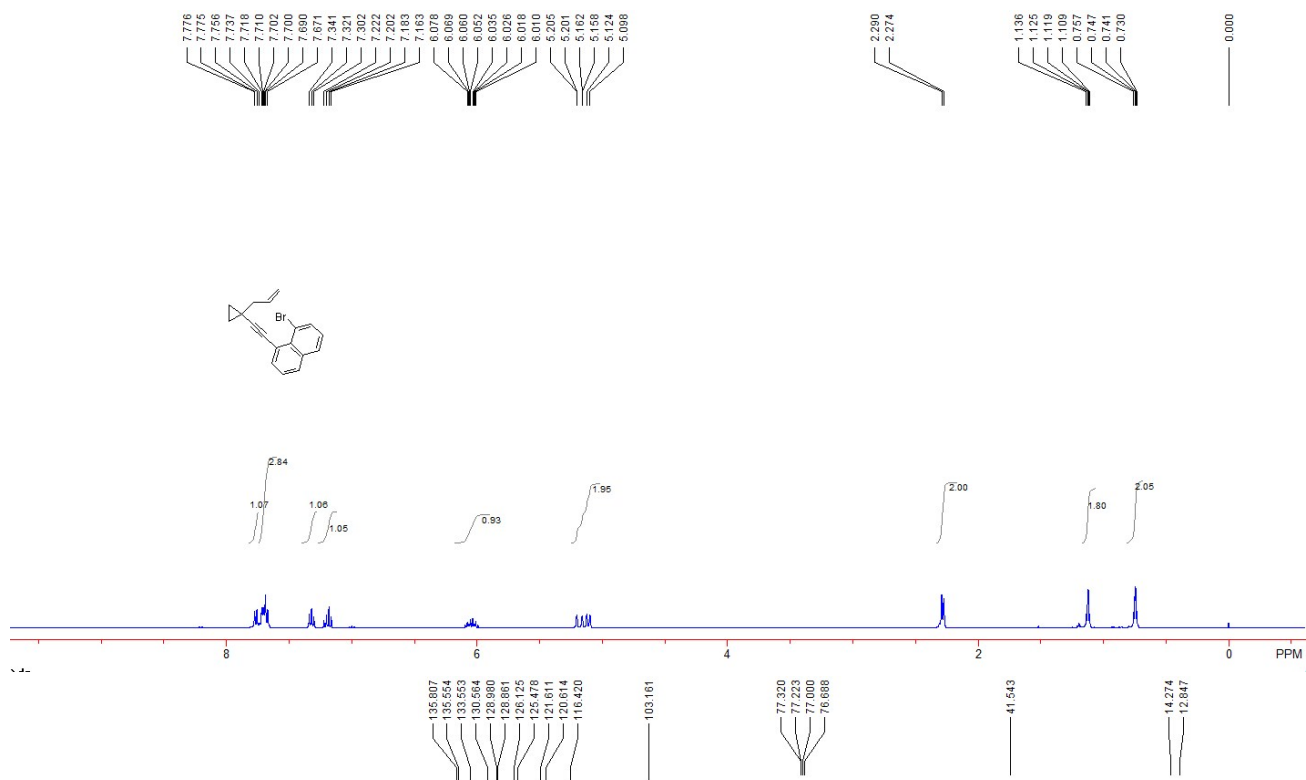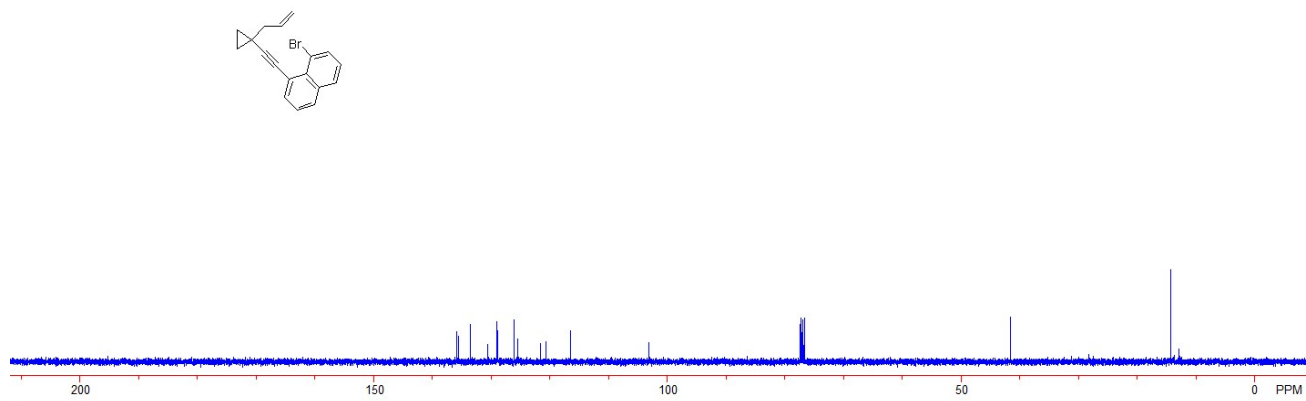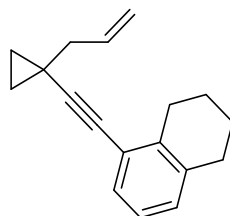

**5-((1-Allylcyclopropyl)ethynyl)-1,2,3,4-tetrahydronaphthalene 2j:**

0.756 g, yield = 80%. Colorless oil. <sup>1</sup>H NMR (400 MHz, CDCl<sub>3</sub>, TMS): δ 0.73 (dd,  $J_1 = 6.8$  Hz,  $J_2 = 4.4$  Hz, 2H, CH<sub>2</sub>), 1.00 (dd,  $J_1 = 6.8$  Hz,  $J_2 = 4.4$  Hz, 2H, CH<sub>2</sub>), 1.71-1.82 (m, 4H, CH<sub>2</sub>), 2.21 (d,  $J = 6.8$  Hz, 2H, CH<sub>2</sub>), 2.71 (dd,  $J_1 = 6.4$  Hz,  $J_2 = 5.6$  Hz, 2H, CH<sub>2</sub>), 2.80 (dd,  $J_1 = 6.4$  Hz,  $J_2 = 6.0$  Hz,

2H, CH<sub>2</sub>), 5.07-5.17 (m, 2H, =CH<sub>2</sub>), 5.93-6.02 (m, 1H, =CH), 6.93-6.99 (m, 2H, Ar), 7.16 (dd,  $J_1 = 7.2$  Hz,  $J_2 = 1.6$  Hz, 1H, Ar). <sup>13</sup>C NMR (100 MHz, CDCl<sub>3</sub>, TMS): δ 12.3, 15.2, 22.8, 23.1, 28.1, 29.7, 42.2, 75.7, 99.3, 116.4, 123.5, 124.8, 128.4, 129.1, 135.6, 137.1, 138.9. IR (CH<sub>2</sub>Cl<sub>2</sub>) ν 3078, 2926, 2858, 1641, 1451, 996, 913, 774, 709 cm<sup>-1</sup>. MS (%) m/z 236 (M<sup>+</sup>, 64.04), 221 (25.25), 207 (33.92), 193 (43.24), 179 (65.72), 165 (100.00), 152 (46.92), 128 (20.88), 115 (23.11), 89 (10.51). HRMS (EI) calcd. for C<sub>18</sub>H<sub>20</sub>: 236.1565, found: 236.1560.

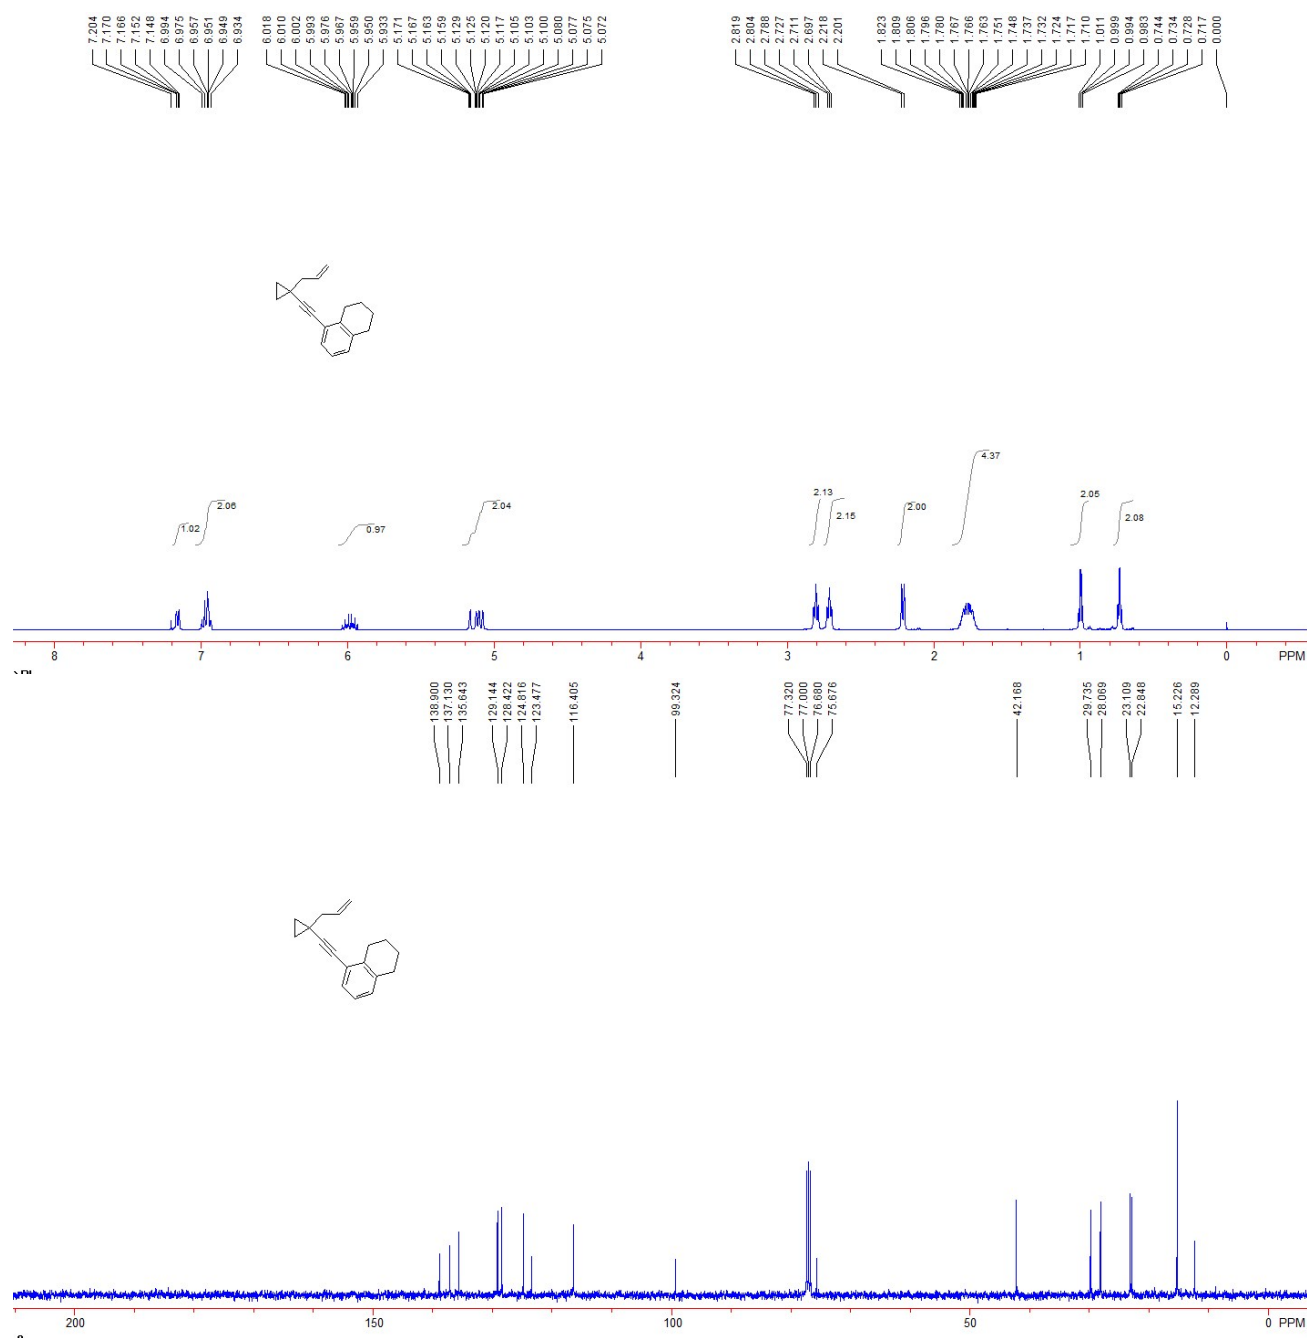

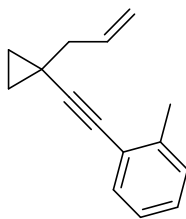

**1-((1-Allylcyclopropyl)ethynyl)-2-methylbenzene 2k:**

0.651 g, yield = 83%. Colorless oil.  $^1\text{H}$  NMR (400 MHz,  $\text{CDCl}_3$ , TMS):  $\delta$  0.74 (dd,  $J_1 = 6.4$  Hz,  $J_2 = 4.4$  Hz, 2H,  $\text{CH}_2$ ), 1.01 (dd,  $J_1 = 6.4$  Hz,  $J_2 = 4.4$  Hz, 2H,  $\text{CH}_2$ ), 2.22 (d,  $J = 6.8$  Hz, 2H,  $\text{CH}_2$ ), 5.10 (dd,  $J_1 = 10.0$  Hz,  $J_2 = 0.8$  Hz, 1H,  $=\text{CH}_2$ ), 5.16 (dd,  $J_1 = 16.0$  Hz,  $J_2 = 0.8$  Hz, 1H,  $=\text{CH}_2$ ), 5.94-6.03 (m, 1H,  $=\text{CH}$ ), 7.05-7.09 (m, 1H, Ar), 7.11-7.14 (m, 2H, Ar), 7.32 (d,  $J = 7.6$  Hz, 1H, Ar).  $^{13}\text{C}$  NMR (100 MHz,  $\text{CDCl}_3$ , TMS):  $\delta$  12.3, 15.2, 20.7, 42.2, 75.8, 98.9, 116.5, 123.6, 125.3, 127.3, 129.2, 131.7, 135.6, 140.0. IR ( $\text{CH}_2\text{Cl}_2$ )  $\nu$  3075, 3006, 2921, 2221, 1642, 1486, 914, 753, 715  $\text{cm}^{-1}$ . MS (%)  $m/z$  196 ( $\text{M}^+$ , 57.33), 181 (76.24), 165 (74.38), 153 (76.62), 128 (68.24), 115 (100.00), 105 (26.31), 89 (21.98), 77 (23.41). HRMS (EI) calcd. for  $\text{C}_{15}\text{H}_{16}$ : 196.1252, found: 196.1246.

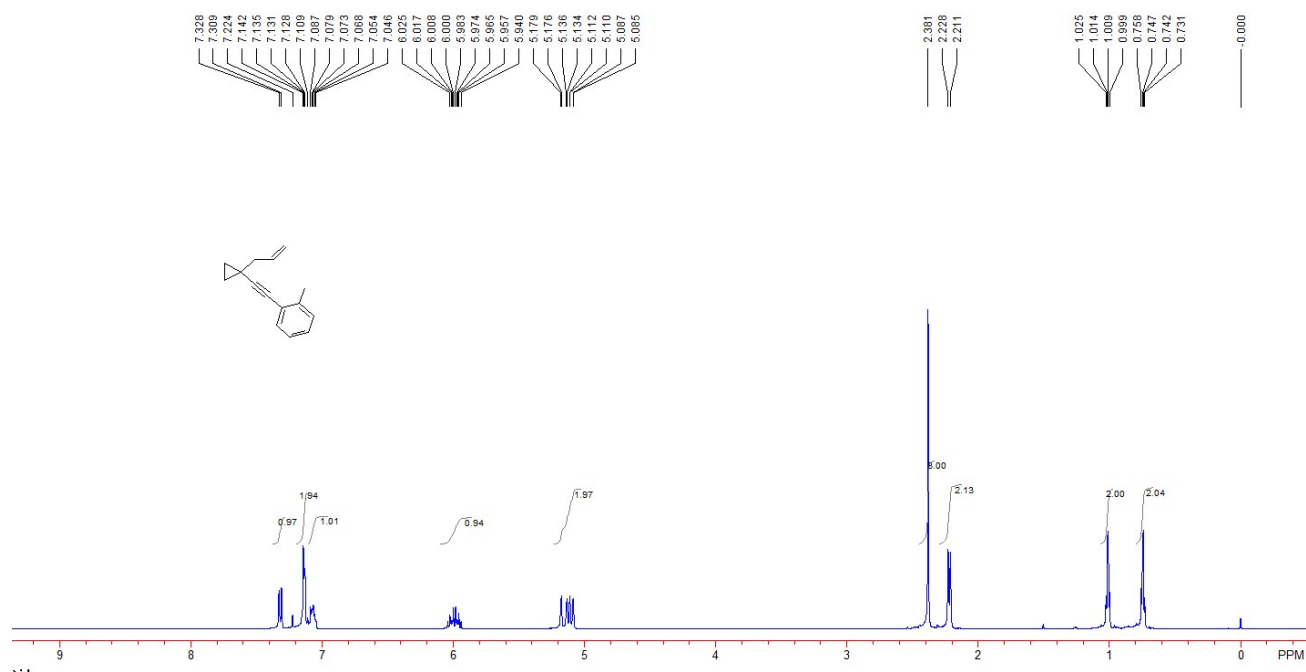

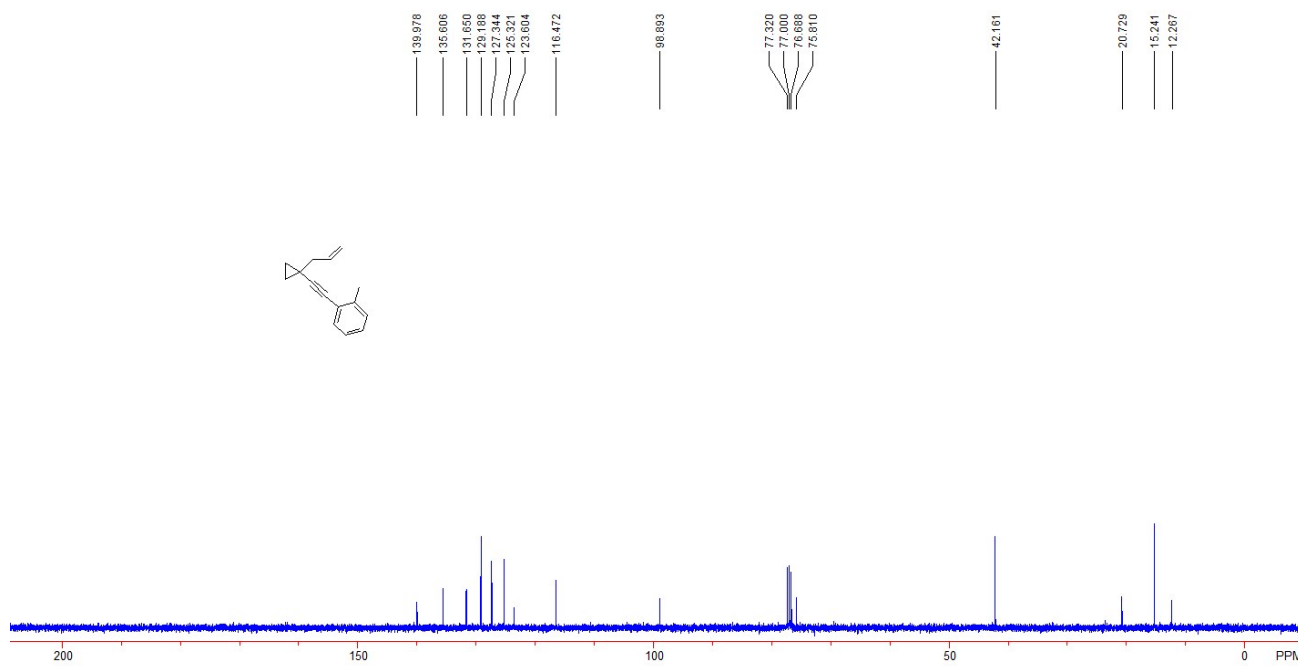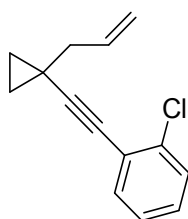

**1-((1-allylcyclopropyl)ethynyl)-2-chlorobenzene 2l:**

0.653 g, yield = 76%. Colorless oil.  $^1\text{H}$  NMR (400 MHz,  $\text{CDCl}_3$ , TMS):  $\delta$  0.76 (dd,  $J_1 = 6.4$  Hz,  $J_2 = 4.4$  Hz, 2H,  $\text{CH}_2$ ), 1.05 (dd,  $J_1 = 6.4$  Hz,  $J_2 = 4.4$  Hz, 2H,  $\text{CH}_2$ ), 2.23 (d,  $J = 6.8$  Hz, 2H,  $\text{CH}_2$ ), 5.11 (d,  $J = 10.4$  Hz, 1H,  $=\text{CH}_2$ ), 5.16 (d,  $J = 17.2$  Hz, 1H,  $=\text{CH}_2$ ), 5.98-6.06 (m, 1H,  $=\text{CH}$ ), 7.11-7.24 (m, 2H, Ar), 7.32-7.35 (m, 1H, Ar), 7.37-7.41 (m, 1H, Ar).  $^{13}\text{C}$  NMR (100 MHz,  $\text{CDCl}_3$ , TMS):  $\delta$  12.3, 15.3, 41.8, 73.8, 100.6, 116.6, 123.7, 126.2, 128.3, 129.0, 133.1, 135.3, 135.7. IR ( $\text{CH}_2\text{Cl}_2$ )  $\nu$  3076, 3006, 2903, 2225, 1475, 1058, 911, 751, 708  $\text{cm}^{-1}$ . MS (%)  $m/z$  216 ( $\text{M}^+$ , 33.78), 201 (11.85), 181 (92.28), 165 (100.00), 152 (48.07), 139 (68.25), 125 (36.91), 99 (17.76), 89 (21.15), 75 (20.26). HRMS (EI) calcd. for  $\text{C}_{14}\text{H}_{13}\text{Cl}$ : 216.0706, found: 216.0710.

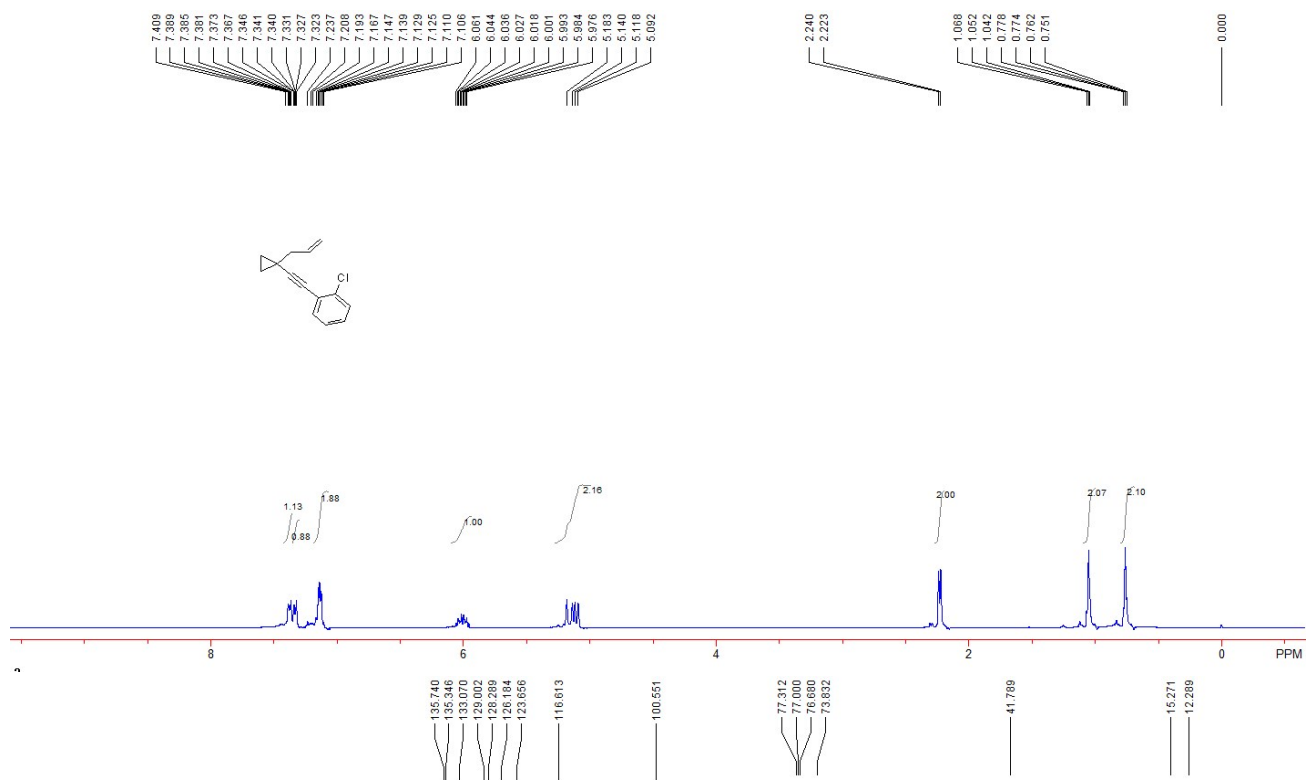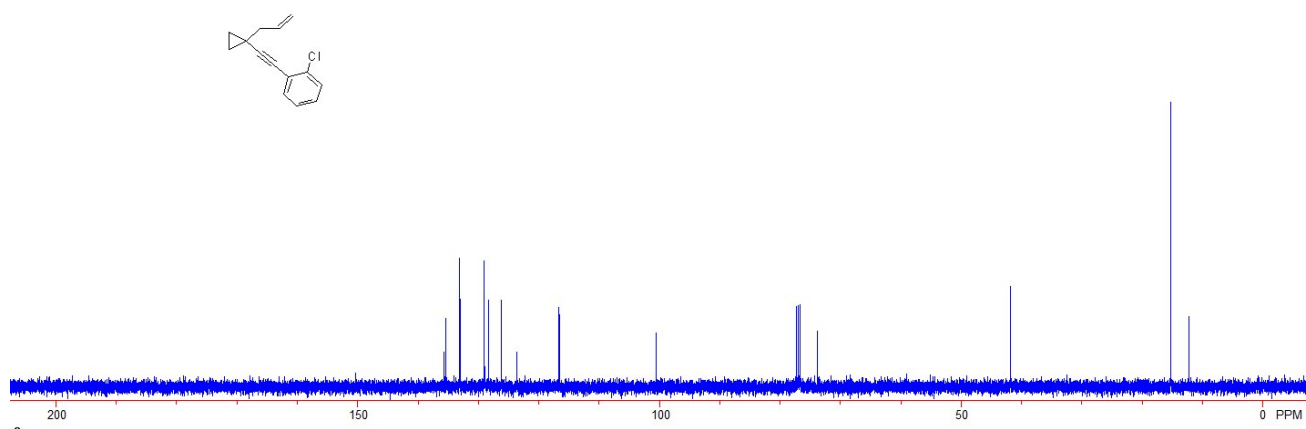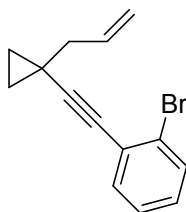

### 1-((1-Allylcyclopropyl)ethynyl)-2-bromobenzene **2m**:

0.444 g, yield = 34%. Colorless oil. <sup>1</sup>H NMR (400 MHz, CDCl<sub>3</sub>, TMS): δ 0.77 (dd,  $J_1 = 6.4$  Hz,  $J_2 = 4.4$  Hz, 2H, CH<sub>2</sub>), 1.06 (dd,  $J_1 = 6.4$  Hz,  $J_2 = 4.4$  Hz, 2H, CH<sub>2</sub>), 2.24 (d,  $J = 7.2$  Hz, 2H, CH<sub>2</sub>), 5.11 (dd,  $J_1 = 10.0$  Hz,  $J_2 = 1.2$  Hz, 1H, =CH<sub>2</sub>), 5.17 (dd,  $J_1 = 17.2$  Hz,  $J_2 = 1.2$  Hz, 1H, =CH<sub>2</sub>), 5.97-6.07

(m, 1H, =CH), 7.05-7.09 (m, 1H, Ar), 7.16-7.20 (m, 1H, Ar), 7.37 (dd,  $J_1 = 8.0$  Hz,  $J_2 = 1.2$  Hz, 1H, Ar), 7.52 (d,  $J = 8.0$  Hz, 1H, Ar).  $^{13}\text{C}$  NMR (100 MHz,  $\text{CDCl}_3$ , TMS):  $\delta$  12.3, 15.3, 41.7, 75.6, 100.0, 116.6, 125.5, 125.8, 126.8, 128.4, 132.1, 133.0, 135.4. IR ( $\text{CH}_2\text{Cl}_2$ )  $\nu$  3076, 3006, 2903, 2225, 1471, 1433, 1026, 917, 751  $\text{cm}^{-1}$ . MS (%)  $m/z$  260 ( $\text{M}^+$ , 19.29), 232 (7.07), 219 (22.21), 181 (43.74), 166 (100.00), 152 (42.97), 140 (73.28), 115 (23.17), 89 (25.08), 76 (35.62). HRMS (EI) calcd. for  $\text{C}_{14}\text{H}_{13}\text{Br}$ : 260.0201, found: 260.0203.

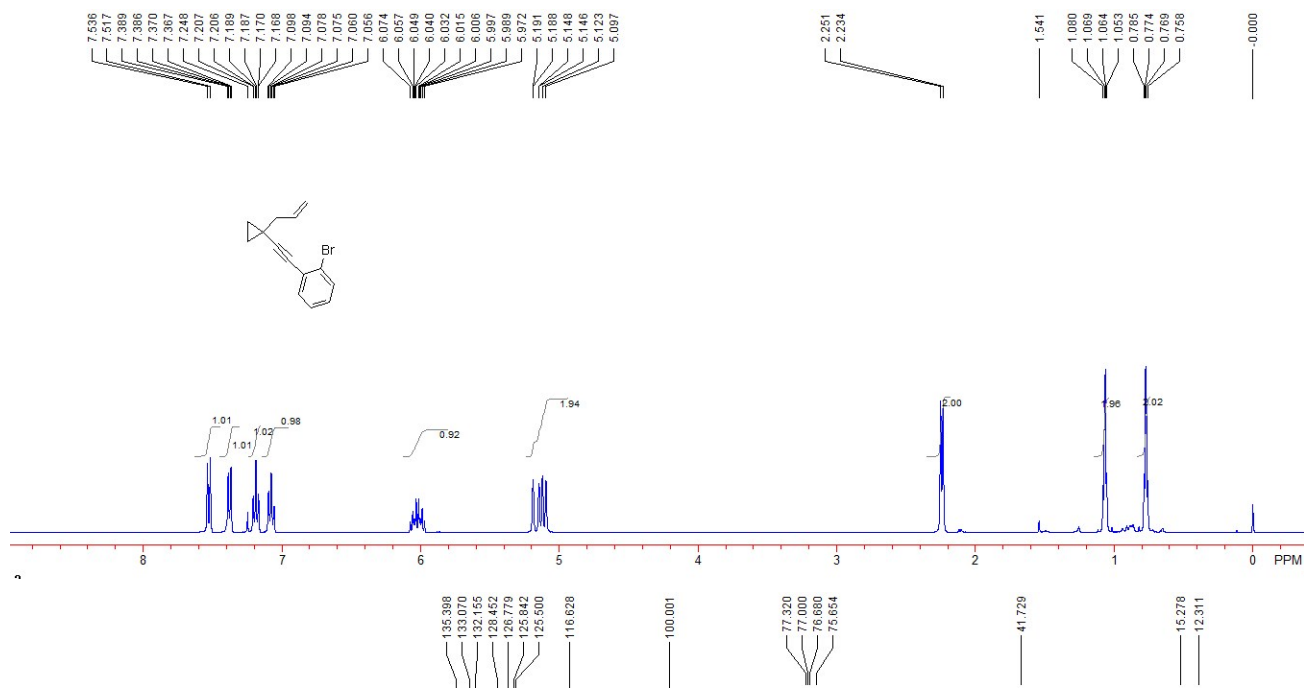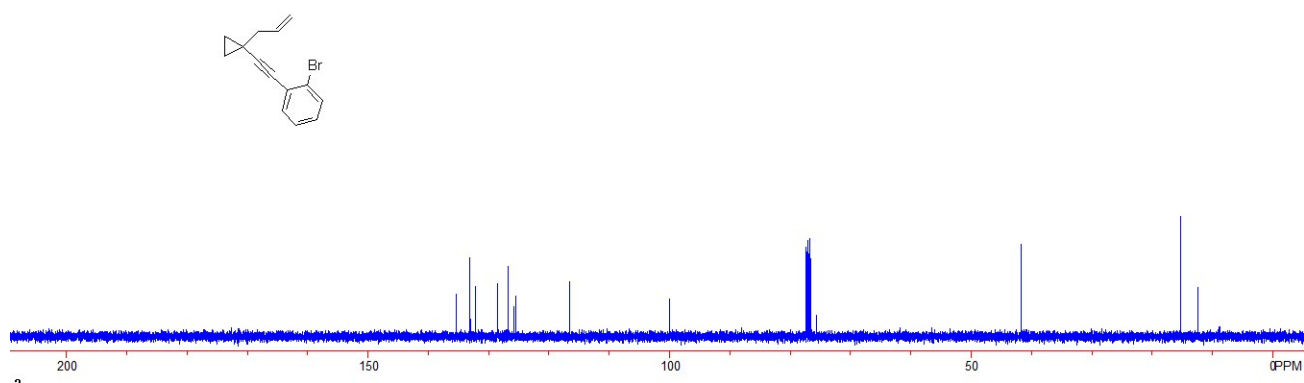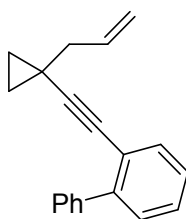

## 2-((1-Allylcyclopropyl)ethynyl)-1,1'-biphenyl 2n:

0.302 g, yield = 29%. Colorless oil.  $^1\text{H}$  NMR (400 MHz,  $\text{CDCl}_3$ , TMS):  $\delta$  0.62 (dd,  $J_1 = 6.8$  Hz,  $J_2 = 4.4$  Hz, 2H,  $\text{CH}_2$ ), 0.83 (dd,  $J_1 = 6.8$  Hz,  $J_2 = 4.4$  Hz, 2H,  $\text{CH}_2$ ), 2.08 (d,  $J = 6.8$  Hz, 2H,  $\text{CH}_2$ ), 4.99-5.05 (m, 2H,  $=\text{CH}_2$ ), 5.77-5.84 (m, 1H,  $=\text{CH}$ ), 7.20-7.22 (m, 1H, Ar), 7.20-7.22 (m, 1H, Ar), 7.24-7.31 (m, 1H, Ar), 7.32-7.34 (m, 2H, Ar), 7.37-7.41 (m, 2H, Ar), 7.45-7.47 (m, 1H, Ar), 7.55-7.57 (m, 2H, Ar).  $^{13}\text{C}$  NMR (100 MHz,  $\text{CDCl}_3$ , TMS):  $\delta$  12.2, 14.8, 41.6, 76.4, 97.8, 116.2, 122.2, 126.8, 127.2, 127.6, 127.7, 129.2, 132.8, 135.6, 140.7, 143.6. IR ( $\text{CH}_2\text{Cl}_2$ )  $\nu$  3063, 3005, 2922, 2222, 1641, 1449, 915, 775, 698  $\text{cm}^{-1}$ . MS (%)  $m/z$  258 ( $\text{M}^+$ , 20.11), 243 (38.44), 229 (61.65), 215 (91.03), 202 (100.00), 189 (23.98), 178 (16.67), 165 (58.67), 93 (38.62), 77 (10.51). HRMS (EI) calcd. for  $\text{C}_{20}\text{H}_{18}$ : 258.1409, found: 258.1406.

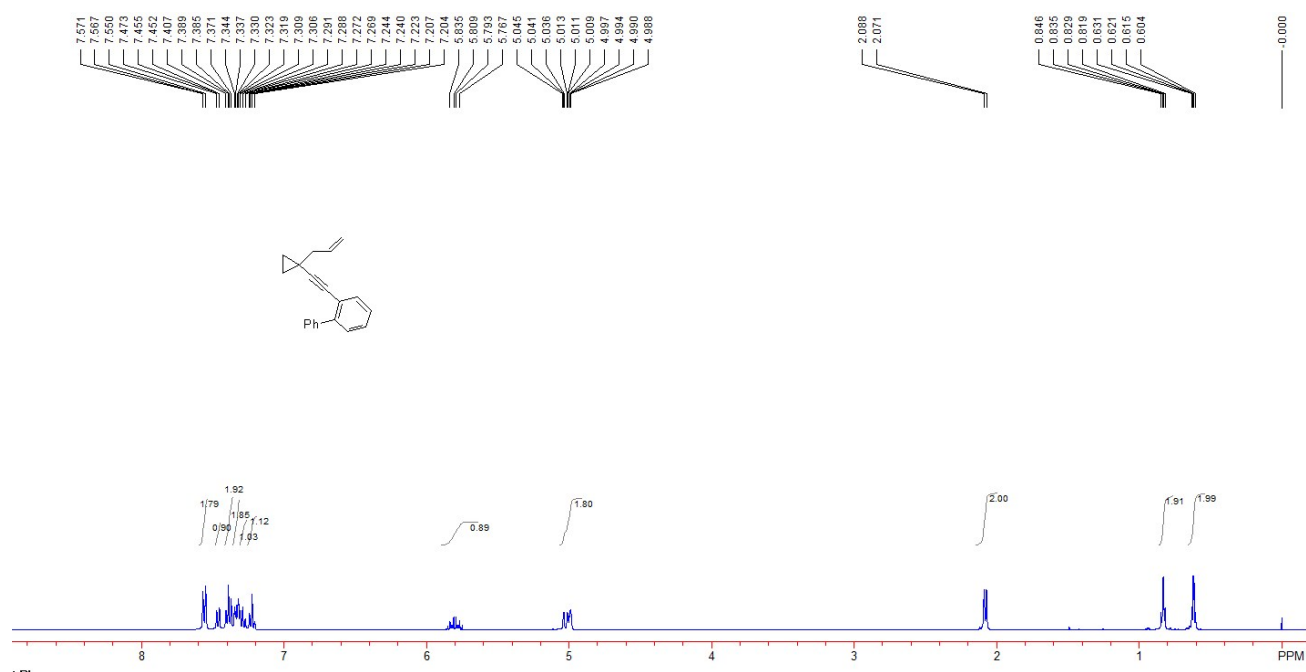

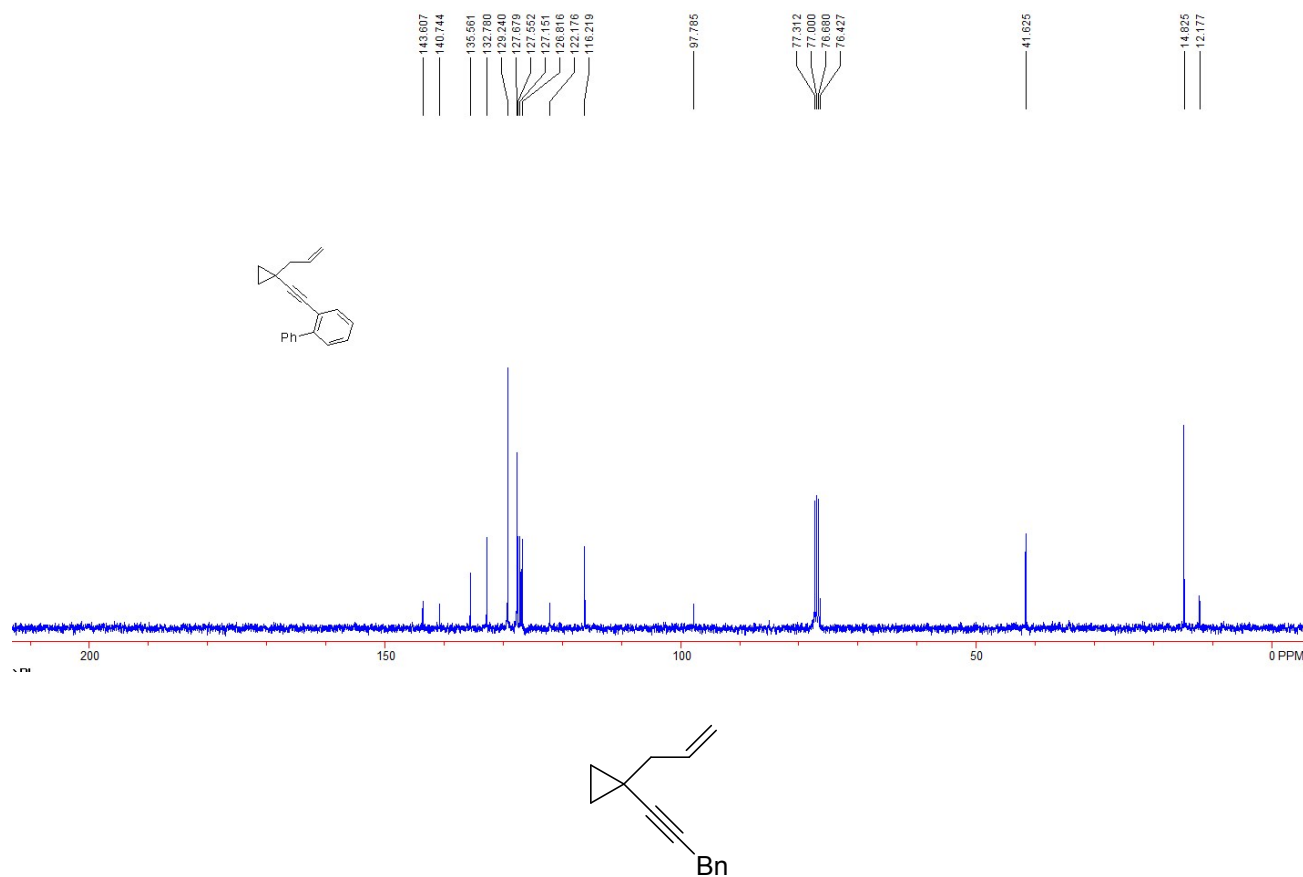

**(3-(1-Allylcyclopropyl)prop-2-yn-1-yl)benzene 2o:**

0.863 g, yield = 59%. Colorless oil. <sup>1</sup>H NMR (400 MHz, CDCl<sub>3</sub>, TMS): δ 0.61-0.63 (m, 2H, CH<sub>2</sub>), 0.89 (dd, *J*<sub>1</sub> = 5.6 Hz, *J*<sub>2</sub> = 4.4 Hz, 2H, CH<sub>2</sub>), 2.14 (d, *J* = 6.8 Hz, 2H, CH<sub>2</sub>), 3.56 (s, 2H, CH<sub>2</sub>), 5.07-5.14 (m, 2H, =CH<sub>2</sub>), 5.90-5.99 (m, 1H, =CH), 7.19-7.23 (m, 1H, Ar), 7.24-7.34 (m, 4H, Ar). <sup>13</sup>C NMR (100 MHz, CDCl<sub>3</sub>, TMS): δ 11.6, 14.56, 14.57, 25.0, 42.2, 74.0, 87.1, 116.3, 126.3, 127.8, 128.3, 135.8, 137.5. IR (CH<sub>2</sub>Cl<sub>2</sub>) ν 3064, 3005, 2921, 2201, 1689, 1275, 913, 750, 696 cm<sup>-1</sup>. MS (%) *m/z* 196 (M<sup>+</sup>, 4.07), 195 (15.33), 181 (49.65), 165 (64.78), 153 (70.59), 128 (58.23), 115 (100.00), 105 (56.39), 91 (77.47), 77 (69.49). HRMS (EI) calcd. for C<sub>15</sub>H<sub>16</sub>: 196.1252, found: 196.1257.

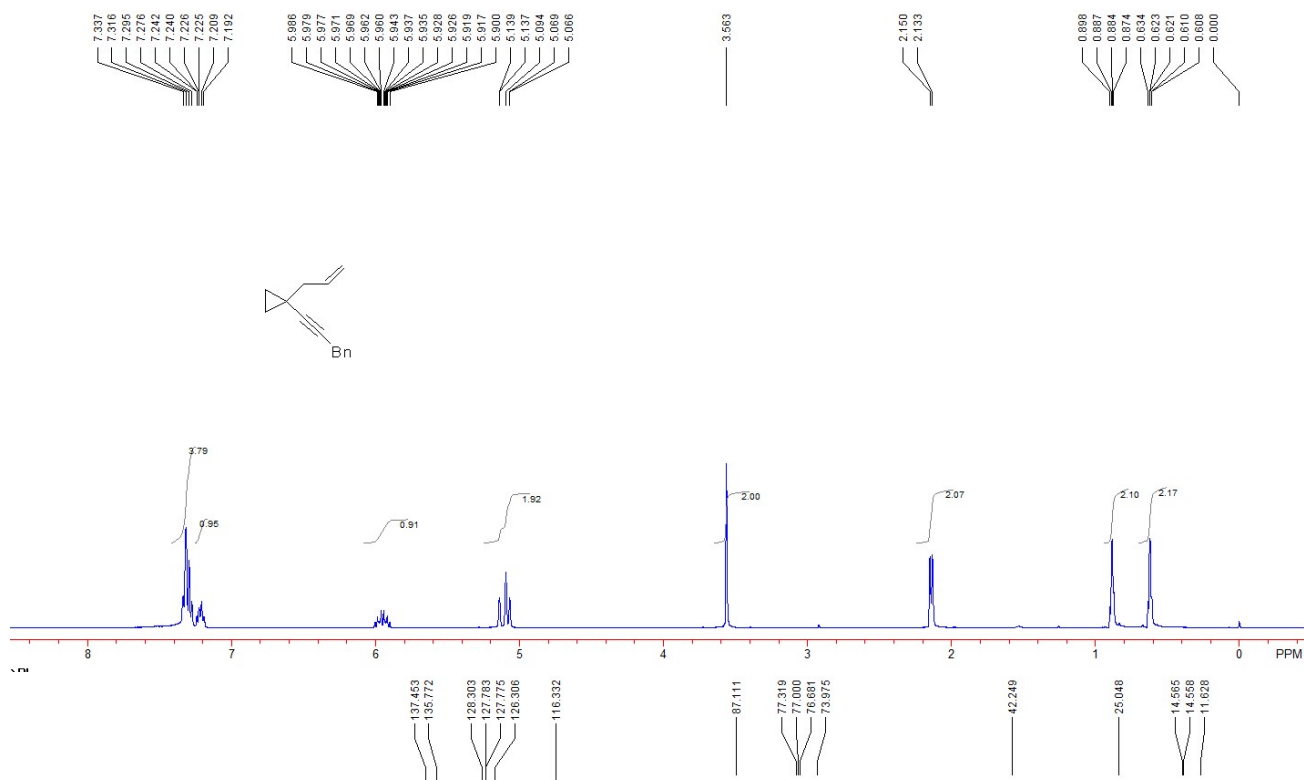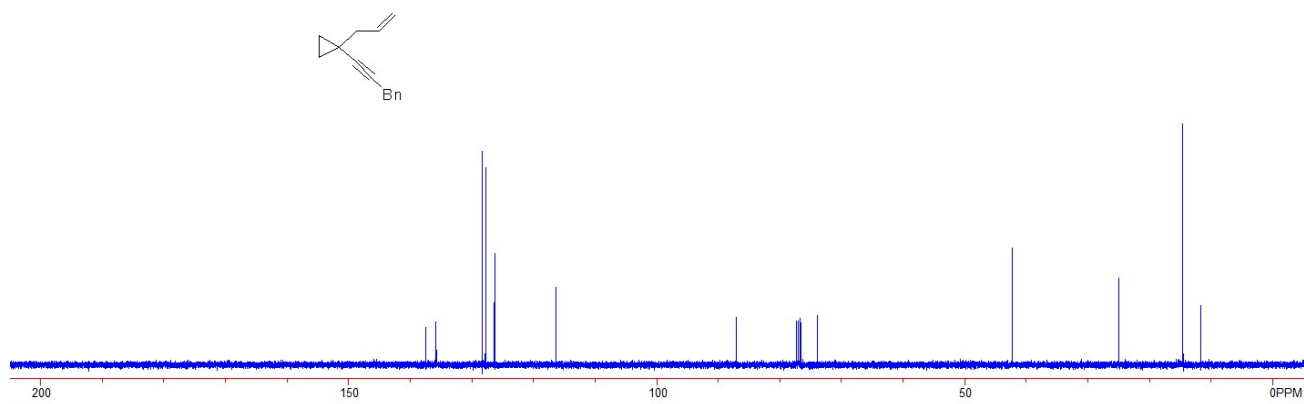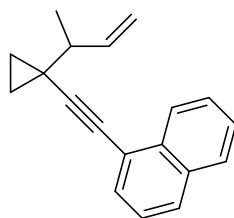

**1-((1-(But-3-en-2-yl)cyclopropyl)ethynyl)naphthalene 2p:**

103 mg, yield = 8%. Colorless oil. <sup>1</sup>H NMR (400 MHz, CDCl<sub>3</sub>, TMS): δ 0.78-0.81 (m, 2H, CH<sub>2</sub>), 1.08-1.14 (m, 2H, CH<sub>2</sub>), 1.34 (d, *J* = 6.8 Hz, 3H, CH<sub>3</sub>), 1.60-1.67 (m, 1H, Ar), 5.08-5.16 (m, 2H, =CH<sub>2</sub>), 6.04-6.12 (m, 1H, =CH), 7.33-7.37 (m, 1H, Ar), 7.45-7.47 (m, 1H, Ar), 7.48-7.51 (m, 1H,

Ar), 7.53-7.55 (m, 1H, Ar), 7.57-7.59 (m, 1H, Ar), 7.72-7.80 (m, 1H, Ar), 8.32 (d,  $J = 8.4$  Hz, 1H, Ar).  $^{13}\text{C}$  NMR (100 MHz,  $\text{CDCl}_3$ , TMS):  $\delta$  15.2, 15.5, 18.0, 18.3, 45.2, 75.9, 98.4, 114.1, 121.7, 125.2, 126.1, 126.3, 126.4, 127.7, 128.2, 130.0, 133.1, 133.6, 141.4. IR ( $\text{CH}_2\text{Cl}_2$ )  $\nu$  3058, 2964, 2926, 2218, 1638, 1399, 913, 797, 771  $\text{cm}^{-1}$ . MS (%)  $m/z$  246 ( $\text{M}^+$ , 93.41), 231 (54.61), 215 (51.62), 202 (57.15), 189 (100.00), 165 (44.53), 152 (24.59), 101 (14.80), 94 (11.57). HRMS (EI) calcd. for  $\text{C}_{19}\text{H}_{18}$ : 246.1409, found: 246.1415.

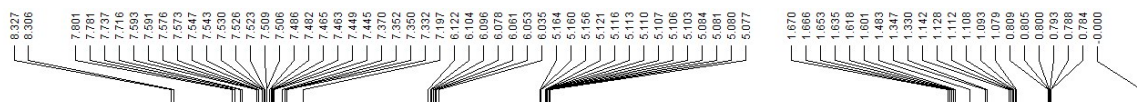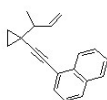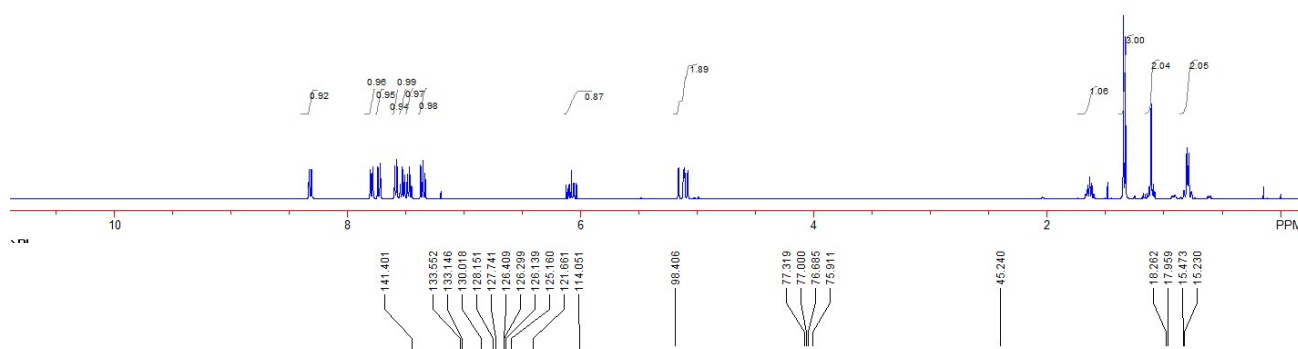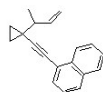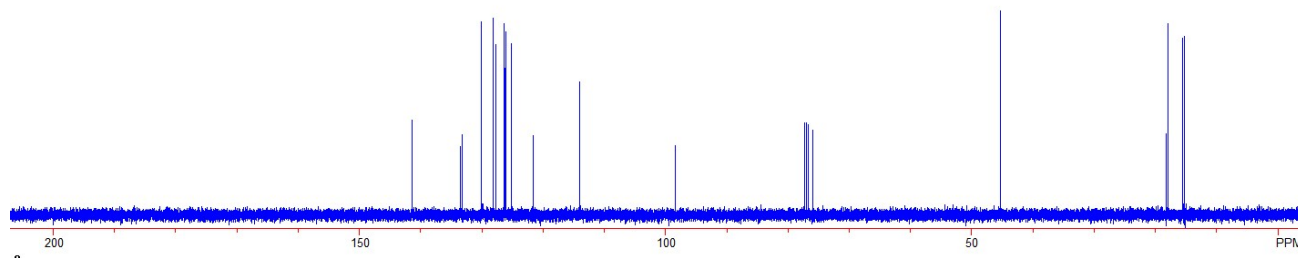

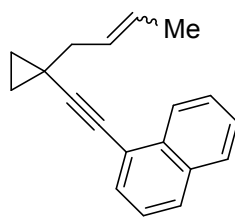

**1-((1-(But-2-en-1-yl)cyclopropyl)ethynyl)naphthalene 2q:**

563 mg, yield = 46%. Colorless oil (mixtures of two isomers, E/Z = 4.4/1).  $^1\text{H}$  NMR (400 MHz,  $\text{CDCl}_3$ , TMS):  $\delta$  0.78-0.83 (m, 2H,  $\text{CH}_2$ ), 1.08-1.11 (m, 2H,  $\text{CH}_2$ ), 1.68 (d,  $J = 5.6$  Hz, 0.51H,  $\text{CH}_3$ ), 1.75 (d,  $J = 5.6$  Hz, 2.26H,  $\text{CH}_3$ ), 2.24 (d,  $J = 5.6$  Hz, 1.58H,  $\text{CH}_2$ ), 2.34 (d,  $J = 5.6$  Hz, 0.36H,  $\text{CH}_2$ ), 5.61-5.73 (m, 2H,  $=\text{CH}$ ), 7.34-7.38 (m, 1H, Ar), 7.46-7.53 (m, 2H, Ar), 7.55-7.58 (m, 1H, Ar), 7.74 (d,  $J = 8.0$  Hz, 1H, Ar), 7.80 (d,  $J = 8.0$  Hz, 1H, Ar), 8.30-8.34 (m, 1H, Ar).  $^{13}\text{C}$  NMR (100 MHz,  $\text{CDCl}_3$ , TMS):  $\delta$  12.9, 13.1, 15.19, 15.22, 18.0, 35.0, 41.0, 74.7, 75.0, 100.3, 100.4, 121.7, 125.2, 125.8, 126.1, 126.30, 126.35, 126.39, 127.35, 127.71, 127.73, 128.13, 129.80, 129.87, 133.1, 133.6. IR ( $\text{CH}_2\text{Cl}_2$ )  $\nu$  3055, 2916, 2850, 2216, 1585, 1398, 565, 797, 771  $\text{cm}^{-1}$ . MS (%)  $m/z$  246 ( $\text{M}^+$ , 84.66), 231 (68.61), 215 (56.98), 202 (64.58), 189 (100.00), 176 (29.70), 165 (38.94), 152 (23.62), 115 (7.87), 101 (10.84). HRMS (EI) calcd. for  $\text{C}_{19}\text{H}_{18}$ : 246.1409, found: 246.1402.

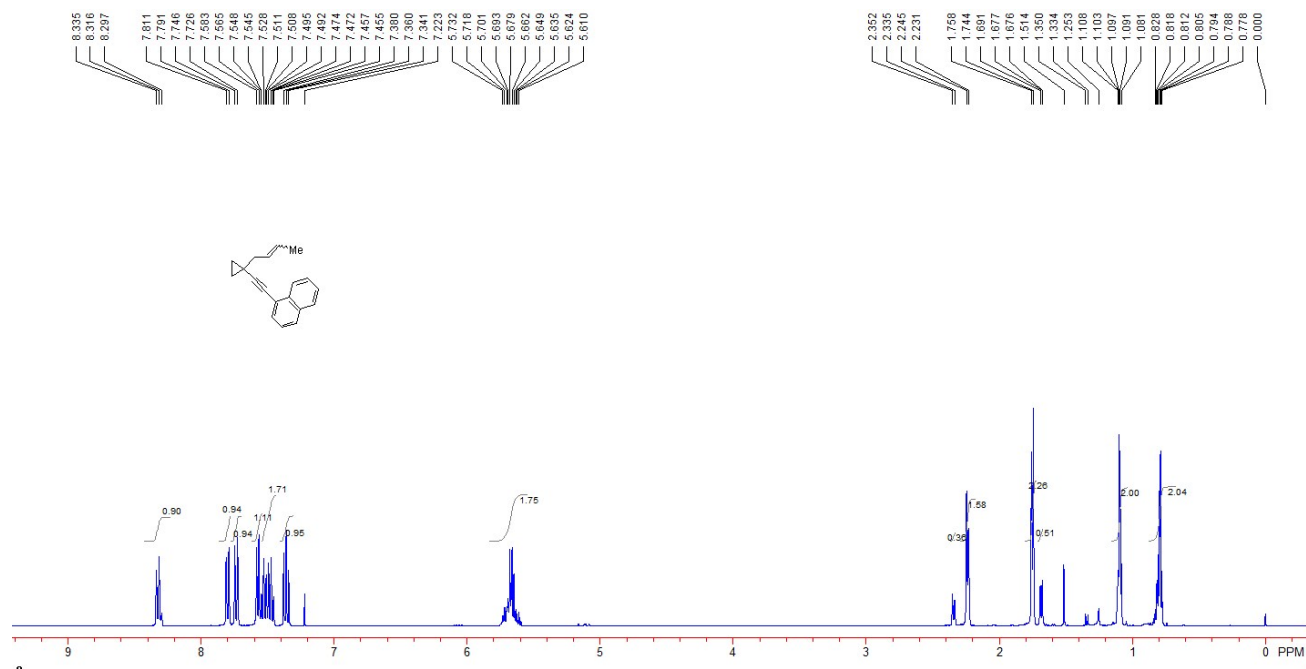

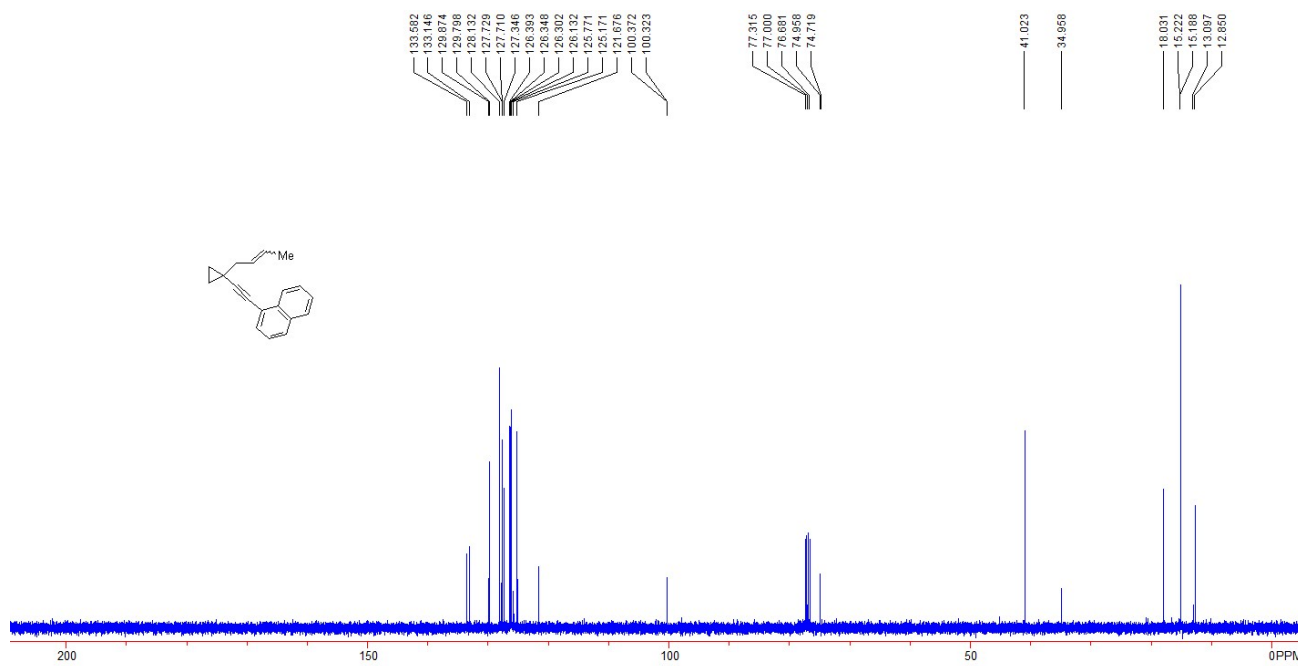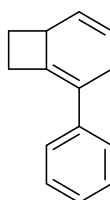

### 2-Phenylbicyclo[4.2.0]octa-1,4-diene 3a:

34 mg, yield = 92%. Colorless oil. <sup>1</sup>H NMR (400 MHz, CDCl<sub>3</sub>, TMS): δ 1.79-1.86 (m, 1H, CH<sub>2</sub>), 2.26-2.32 (m, 1H, CH<sub>2</sub>), 2.66-2.82 (m, 2H, CH<sub>2</sub>), 3.07-3.15 (m, 1H, CH<sub>2</sub>), 3.22-2.29 (m, 1H, CH<sub>2</sub>), 3.54-3.55 (m, 1H, CH), 5.83-5.90 (m, 1H, =CH), 5.91-5.93 (m, 1H, =CH), 7.18-7.21 (m, 1H, Ar), 7.25-7.33 (m, 4H, Ar). <sup>13</sup>C NMR (100 MHz, CDCl<sub>3</sub>, TMS): δ 27.4, 28.6, 32.6, 44.0, 123.2, 126.2, 126.7, 128.2, 128.3, 138.9, 140.1. IR (CH<sub>2</sub>Cl<sub>2</sub>) ν 3024, 2938, 2852, 1683, 1495, 908, 761, 694, 676 cm<sup>-1</sup>. MS (%) m/z 182 (M<sup>+</sup>, 45.82), 167 (55.47), 154 (100.00), 128 (18.04), 115 (23.54), 91 (32.38), 77 (27.67), 63 (12.20). HRMS (EI) calcd. for C<sub>14</sub>H<sub>14</sub>: 182.1096, found: 182.1101.

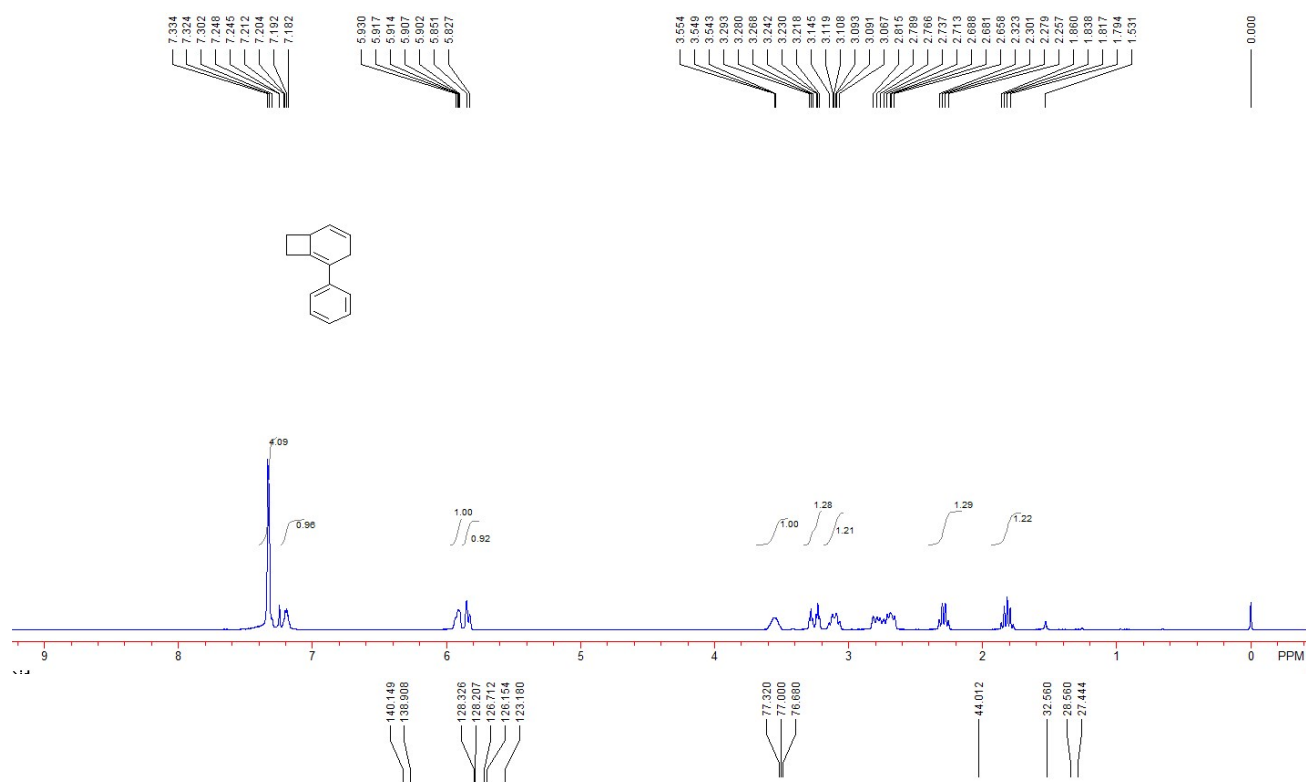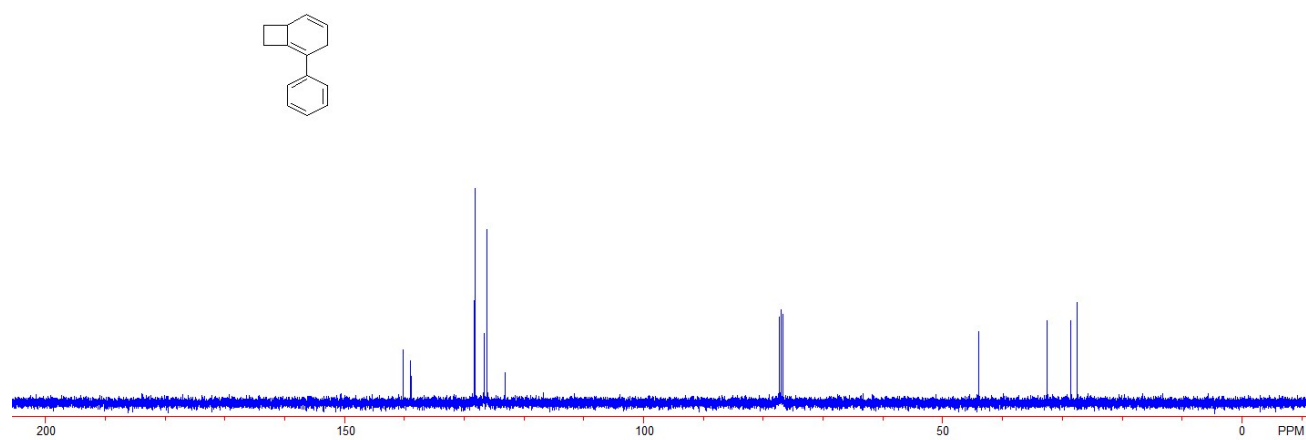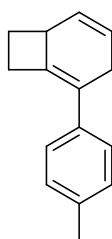

**2-(*p*-Tolyl)bicyclo[4.2.0]octa-1,4-diene 3b:**

36 mg, yield = 90%. Colorless oil. <sup>1</sup>H NMR (400 MHz, CDCl<sub>3</sub>, TMS): δ 1.76-1.85 (m, 1H, CH<sub>2</sub>), 2.26-2.31 (m, 1H, CH<sub>2</sub>), 2.33 (s, 3H, CH<sub>3</sub>), 2.64-2.70 (m, 2H, CH<sub>2</sub>), 2.72-2.80 (m, 1H, CH<sub>2</sub>), 3.05-3.13 (m, 1H, CH<sub>2</sub>), 3.20-2.27 (m, 1H, CH<sub>2</sub>), 3.50-3.57 (m, 1H, CH), 5.82-5.84 (m, 1H, =CH), 5.89-

5.92 (m, 1H, =CH), 7.13 (d,  $J = 8.0$  Hz, 2H, Ar), 7.23 (d,  $J = 8.0$  Hz, 2H, Ar).  $^{13}\text{C}$  NMR (100 MHz,  $\text{CDCl}_3$ , TMS):  $\delta$  21.1, 27.5, 28.6, 32.5, 44.0, 123.0, 126.1, 126.8, 128.4, 128.9, 135.8, 136.0, 139.2. IR ( $\text{CH}_2\text{Cl}_2$ )  $\nu$  3024, 2921, 1514, 1468, 1034, 814, 785, 708  $\text{cm}^{-1}$ . MS (%)  $m/z$  196 ( $\text{M}^+$ , 49.29), 181 (100.00), 165 (54.84), 152 (20.96), 128 (13.63), 115 (19.06), 105 (22.60), 89 (20.62), 77 (14.03). HRMS (EI) calcd. for  $\text{C}_{15}\text{H}_{16}$ : 196.1252, found: 196.1260.

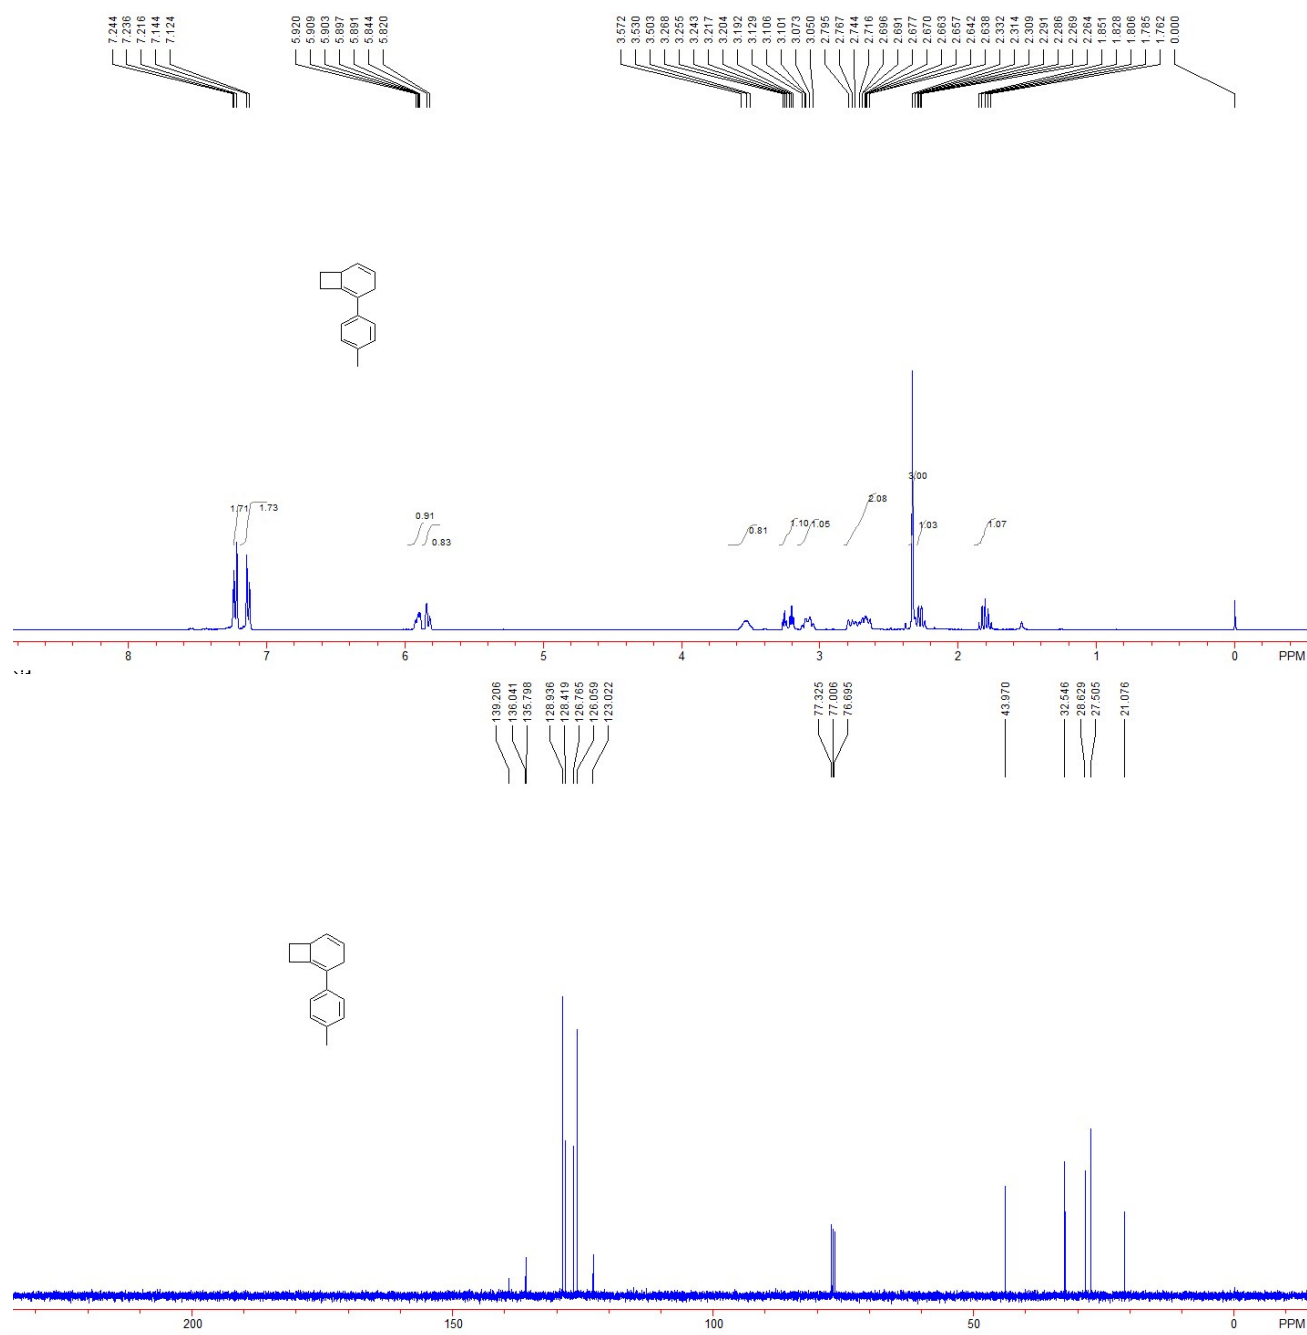

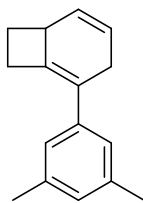

**2-(3,5-Dimethylphenyl)bicyclo[4.2.0]octa-1,4-diene 3c:**

38 mg, yield = 91%. Colorless oil.  $^1\text{H}$  NMR (400 MHz,  $\text{CDCl}_3$ , TMS):  $\delta$  1.76-1.81 (m, 1H,  $\text{CH}_2$ ), 2.25-2.30 (m, 1H,  $\text{CH}_2$ ), 2.36 (s, 6H,  $\text{CH}_3$ ), 2.63-2.78 (m, 2H,  $\text{CH}_2$ ), 3.06-3.09 (m, 1H,  $\text{CH}_2$ ), 3.19-2.26 (m, 1H,  $\text{CH}_2$ ), 3.51-3.53 (m, 1H, CH), 5.80-5.83 (m, 1H, =CH), 5.87-5.91 (m, 1H, =CH), 6.84 (s, 1H, Ar), 6.94 (s, 2H, Ar).  $^{13}\text{C}$  NMR (100 MHz,  $\text{CDCl}_3$ , TMS):  $\delta$  21.4, 27.6, 28.6, 32.6, 44.0, 123.3, 124.1, 126.8, 127.9, 128.3, 137.6, 138.9, 139.1. IR ( $\text{CH}_2\text{Cl}_2$ )  $\nu$  3023, 2939, 2857, 1599, 1463, 845, 787, 709  $\text{cm}^{-1}$ . MS (%)  $m/z$  210 ( $\text{M}^+$ , 34.63), 195 (100.00), 182 (57.18), 167 (54.10), 152 (17.91), 128 (14.69), 115 (18.93), 89 (27.48), 77 (19.97). HRMS (EI) calcd. for  $\text{C}_{16}\text{H}_{18}$ : 210.1409, found: 210.1414.

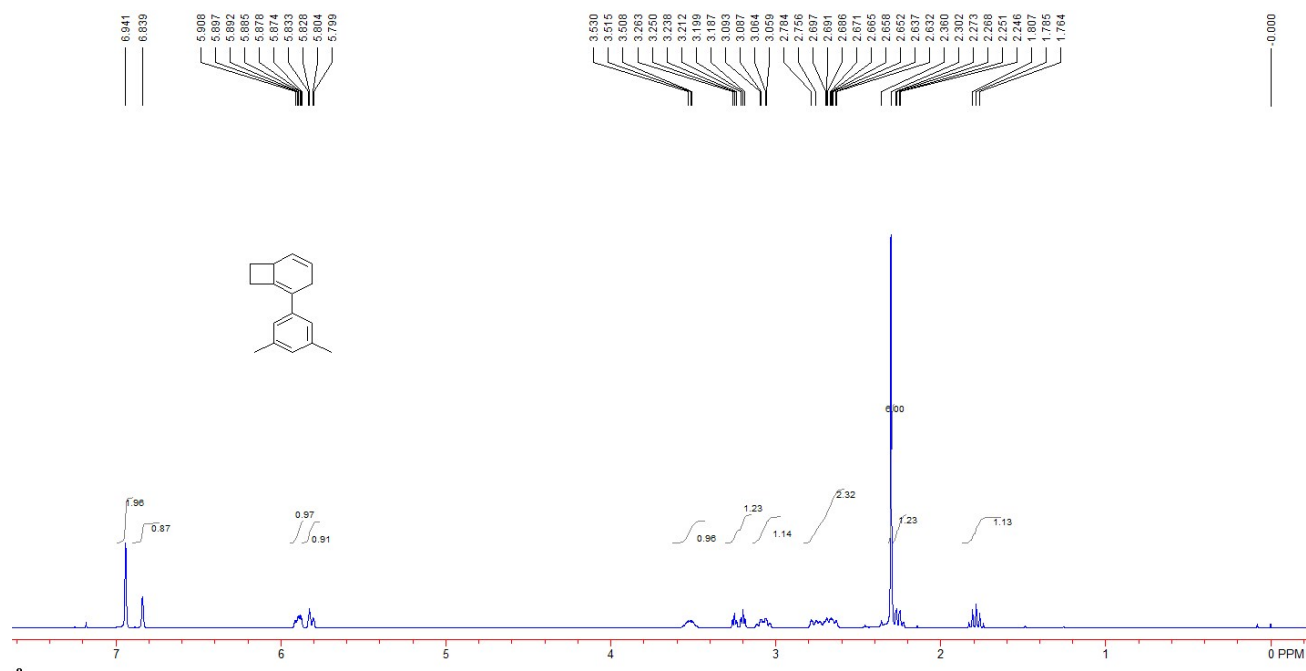

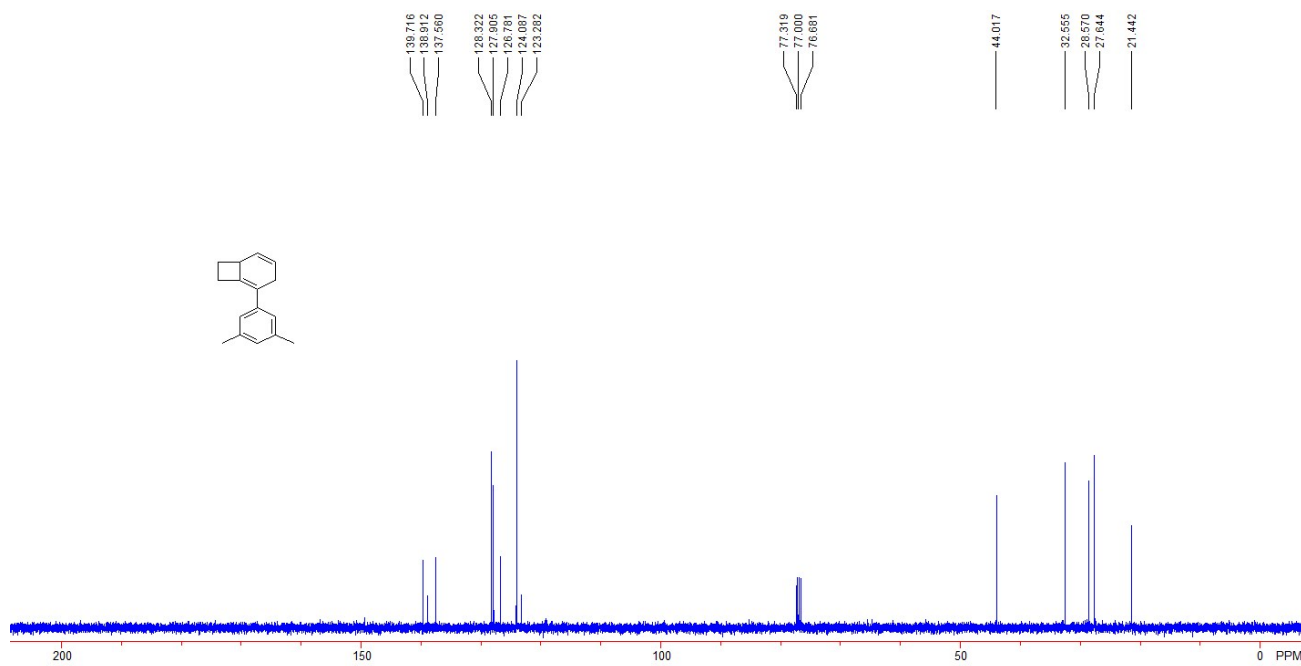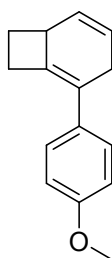

**2-(4-Methoxyphenyl)bicyclo[4.2.0]octa-1,4-diene 3d:**

40 mg, yield = 93%. White solid, mp: 85-88 °C. <sup>1</sup>H NMR (400 MHz, CDCl<sub>3</sub>, TMS): δ 1.76-1.85 (m, 1H, CH<sub>2</sub>), 2.23-2.31 (m, 1H, CH<sub>2</sub>), 2.62-2.68 (m, 1H, CH<sub>2</sub>), 2.72-2.78 (m, 1H, CH<sub>2</sub>), 3.04-3.12 (m, 1H, CH<sub>2</sub>), 3.16-2.24 (m, 1H, CH<sub>2</sub>), 3.51-3.54 (m, 1H, CH), 3.79 (s, 3H, CH<sub>3</sub>), 5.82-5.84 (m, 1H, =CH), 5.89-5.92 (m, 1H, =CH), 6.86-6.88 (m, 2H, Ar), 7.26 (d, *J* = 8.8 Hz, 2H, Ar). <sup>13</sup>C NMR (100 MHz, CDCl<sub>3</sub>, TMS): δ 27.5, 28.6, 32.4, 43.9, 55.2, 113.6, 122.5, 126.7, 127.2, 128.5, 131.5, 138.1, 157.9. IR (CH<sub>2</sub>Cl<sub>2</sub>) ν 3022, 2935, 2834, 1606, 1510, 1245, 1177, 1035, 829 cm<sup>-1</sup>. MS (%) *m/z* 212 (M<sup>+</sup>, 100.00), 197 (34.02), 184 (40.86), 169 (38.30), 165 (30.79), 141 (37.92), 128 (13.79), 115 (39.22), 91 (19.21), 77 (18.89). HRMS (EI) calcd. for C<sub>15</sub>H<sub>16</sub>O: 212.1201, found: 212.1197.

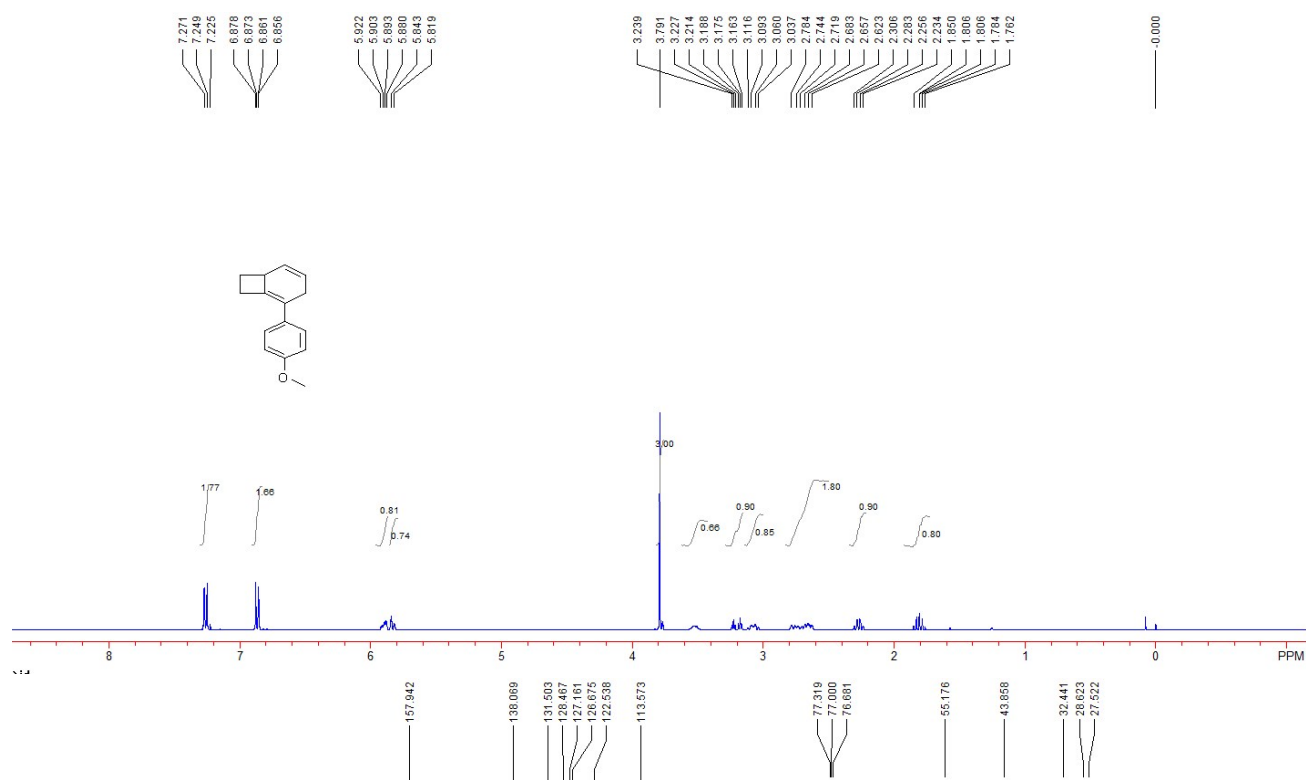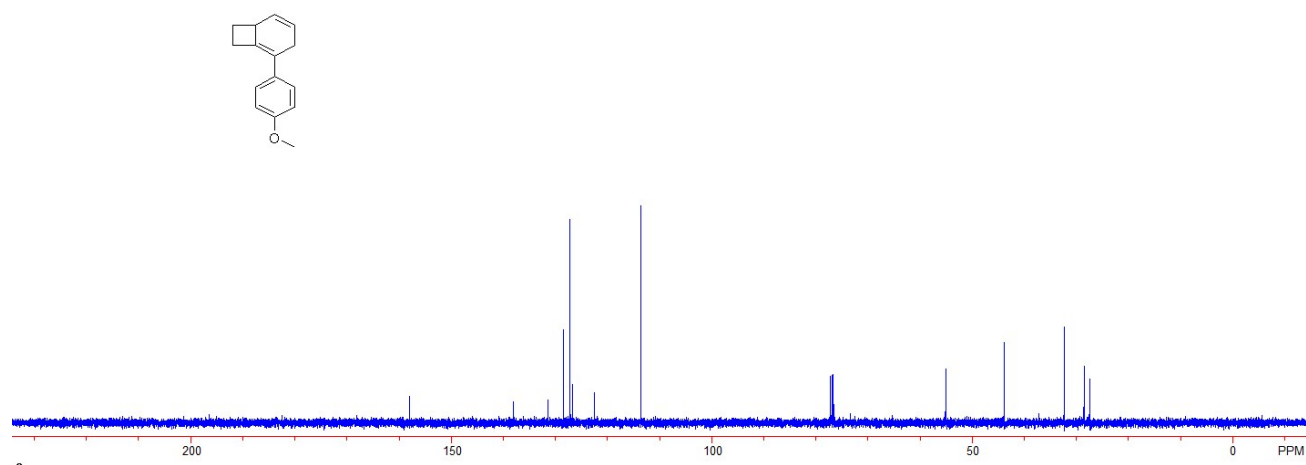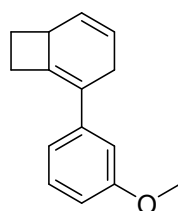

### 2-Phenylbicyclo[4.2.0]octa-1,4-diene 3e:

37 mg, yield = 88%. Colorless oil. <sup>1</sup>H NMR (400 MHz, CDCl<sub>3</sub>, TMS): δ 1.77-1.83 (m, 1H, CH<sub>2</sub>), 2.24-2.32 (m, 1H, CH<sub>2</sub>), 2.67-2.80 (m, 2H, CH<sub>2</sub>), 3.06-3.13 (m, 1H, CH<sub>2</sub>), 3.18-2.21 (m, 1H, CH<sub>2</sub>), 3.50-3.58 (m, 1H, CH), 3.80 (s, 3H, CH<sub>3</sub>), 5.81-5.84 (m, 1H, =CH), 5.90-5.93 (m, 1H, =CH), 6.75

(dd,  $J_1 = 8.0$  Hz,  $J_2 = 2.4$  Hz, 1H, Ar), 6.87 (dd,  $J_1 = 2.4$  Hz,  $J_2 = 1.6$  Hz, 1H, Ar), 6.93 (d,  $J = 8.0$  Hz, 1H, Ar), 7.23 (d,  $J = 8.0$  Hz, 1H, Ar).  $^{13}\text{C}$  NMR (100 MHz,  $\text{CDCl}_3$ , TMS):  $\delta$  27.5, 28.5, 32.6, 44.0, 55.1, 111.5, 112.0, 118.7, 123.1, 126.7, 128.2, 129.1, 140.4, 140.5, 159.5. IR ( $\text{CH}_2\text{Cl}_2$ )  $\nu$  3023, 2937, 2832, 1597, 1575, 1484, 1210, 1041, 774, 692  $\text{cm}^{-1}$ . MS (%)  $m/z$  212 ( $\text{M}^+$ , 53.91), 197 (26.24), 184 (100.00), 181 (63.27), 165 (41.70), 141 (38.20), 115 (45.38), 91 (18.19), 77 (17.19). HRMS (EI) calcd. for  $\text{C}_{15}\text{H}_{16}\text{O}$ : 212.1201, found: 212.1204.

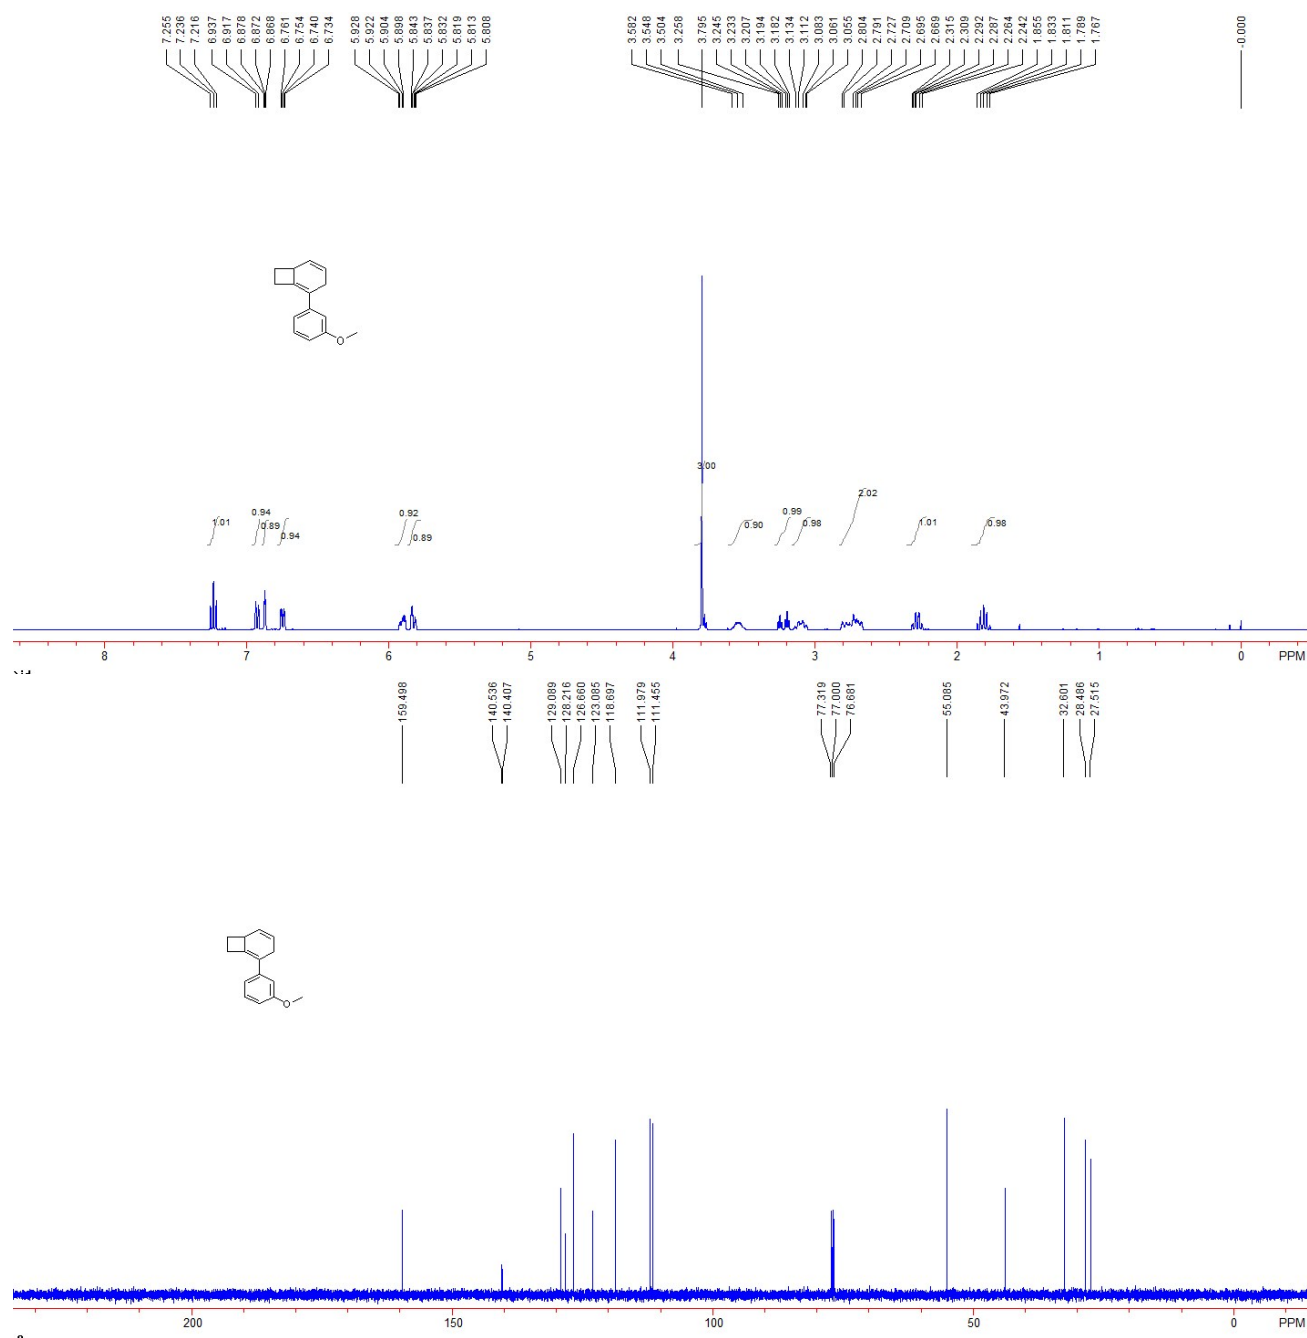

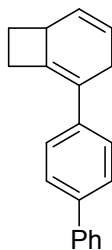

**2-([1,1'-Biphenyl]-4-yl)bicyclo[4.2.0]octa-1,4-diene 3f:**

48 mg, yield = 92%. White solid. Mp: 80-83 °C.  $^1\text{H}$  NMR (400 MHz,  $\text{CDCl}_3$ , TMS):  $\delta$  1.78-1.87 (m, 1H,  $\text{CH}_2$ ), 2.26-2.32 (m, 1H,  $\text{CH}_2$ ), 2.70-2.83 (m, 2H,  $\text{CH}_2$ ), 3.10-3.14 (m, 1H,  $\text{CH}_2$ ), 3.25-3.30 (m, 1H,  $\text{CH}_2$ ), 3.56-3.57 (m, 1H, CH), 5.83-5.85 (m, 1H, =CH), 5.91 (br, 1H, =CH), 7.29-7.35 (m, 1H, Ar), 7.40-7.48 (m, 4H, Ar), 7.55-7.60 (m, 4H, Ar).  $^{13}\text{C}$  NMR (100 MHz,  $\text{CDCl}_3$ , TMS):  $\delta$  27.4, 28.6, 32.7, 44.1, 122.8, 126.5, 126.7, 126.9, 127.0, 128.3, 128.7, 137.9, 138.8, 140.5, 140.8. IR ( $\text{CH}_2\text{Cl}_2$ )  $\nu$  3020, 2941, 2846, 1628, 1486, 835, 764, 724, 692  $\text{cm}^{-1}$ . MS (%)  $m/z$  258 ( $\text{M}^+$ , 100.00), 243 (29.87), 230 (84.04), 215 (13.30), 167 (26.12), 152 (14.74), 115 (23.18), 91 (24.96), 77 (13.45). HRMS (EI) calcd. for  $\text{C}_{20}\text{H}_{18}$ : 258.1409, found: 258.1403.

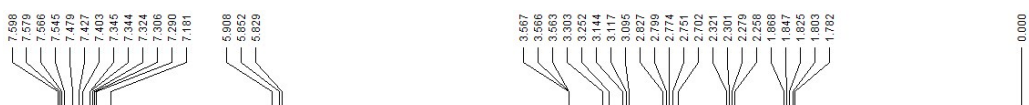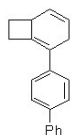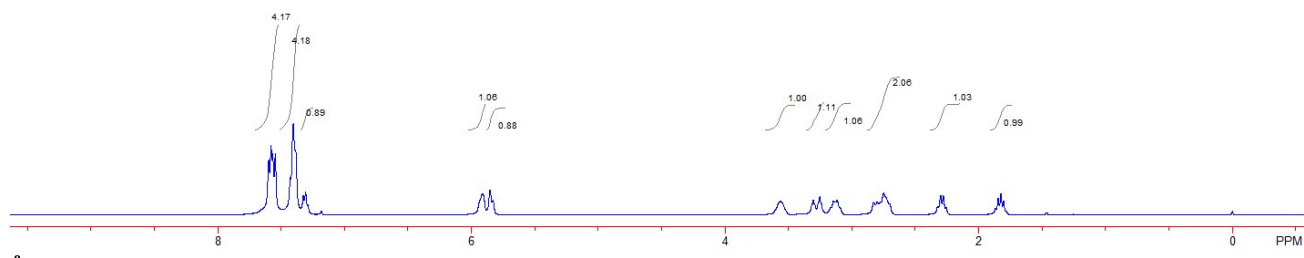

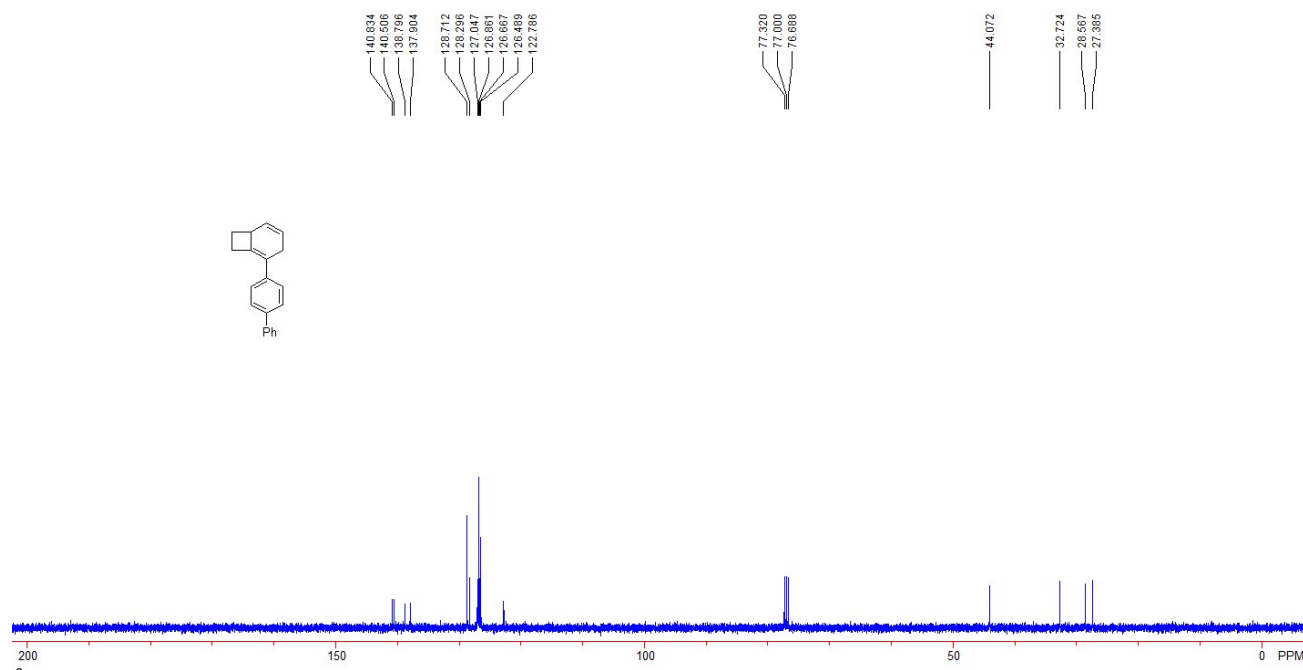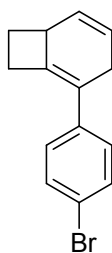

**2-(4-Bromophenyl)bicyclo[4.2.0]octa-1,4-diene 3g:**

44 mg, yield = 85%. Colorless oil. <sup>1</sup>H NMR (400 MHz, CDCl<sub>3</sub>, TMS): δ 1.79-1.83 (m, 1H, CH<sub>2</sub>), 2.25-2.32 (m, 1H, CH<sub>2</sub>), 2.60-2.66 (m, 1H, CH<sub>2</sub>), 2.71-2.79 (m, 1H, CH<sub>2</sub>), 3.00-3.09 (m, 1H, CH<sub>2</sub>), 3.13-2.21 (m, 1H, CH<sub>2</sub>), 3.48-3.57 (m, 1H, CH), 5.81-5.84 (m, 1H, =CH), 5.88-5.89 (m, 1H, =CH), 7.17 (d, *J* = 8.4 Hz, 2H, Ar), 7.42 (d, *J* = 8.4 Hz, 2H, Ar). <sup>13</sup>C NMR (100 MHz, CDCl<sub>3</sub>, TMS): δ 27.3, 28.5, 32.5, 44.0, 119.7, 122.3, 126.4, 127.7, 128.2, 131.2, 137.8, 141.0. IR (CH<sub>2</sub>Cl<sub>2</sub>) ν 3024, 2939, 2853, 1682, 1489, 1072, 1008, 821, 696 cm<sup>-1</sup>. MS (%) *m/z* 260 (M<sup>+</sup>, 7.37), 245 (6.92), 232 (48.93), 181 (100.00), 165 (58.85), 152 (44.11), 115 (11.60), 89 (31.58), 76 (30.67). HRMS (EI) calcd. for C<sub>14</sub>H<sub>13</sub>Br: 260.0201, found: 260.0195.

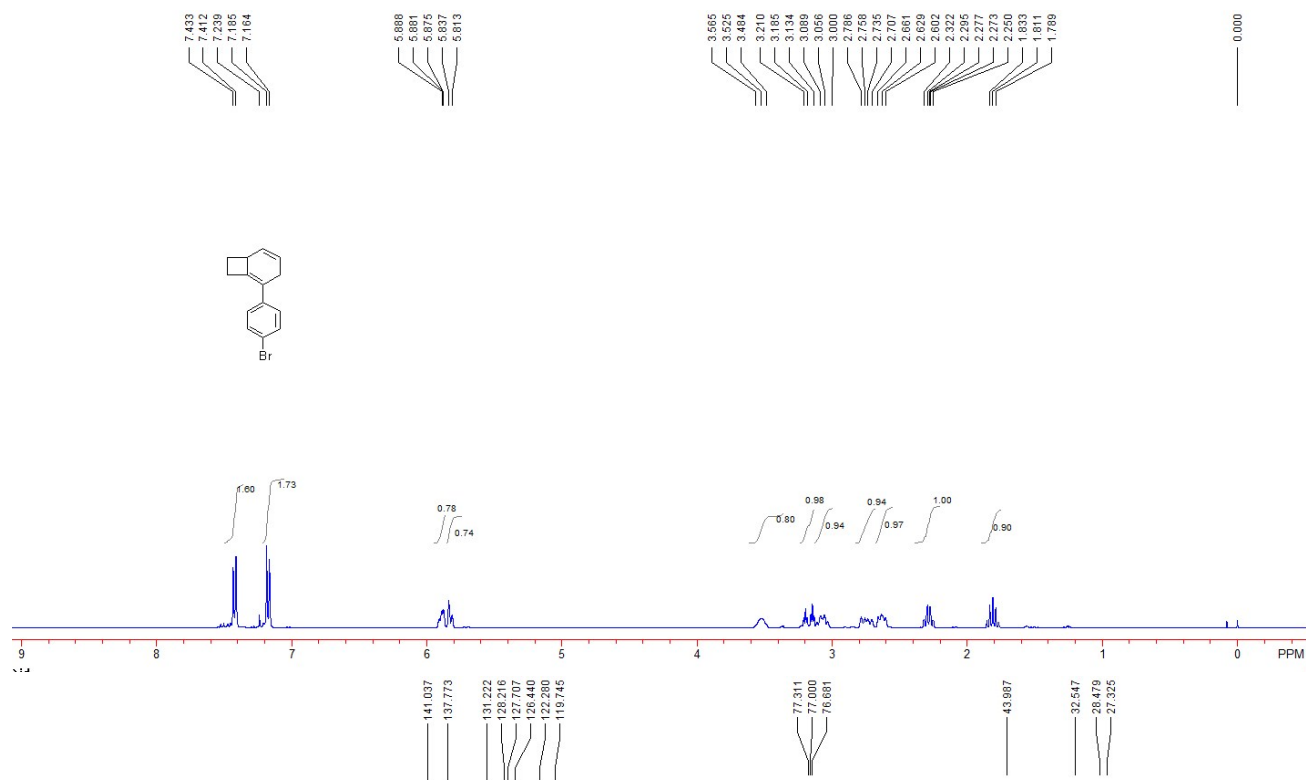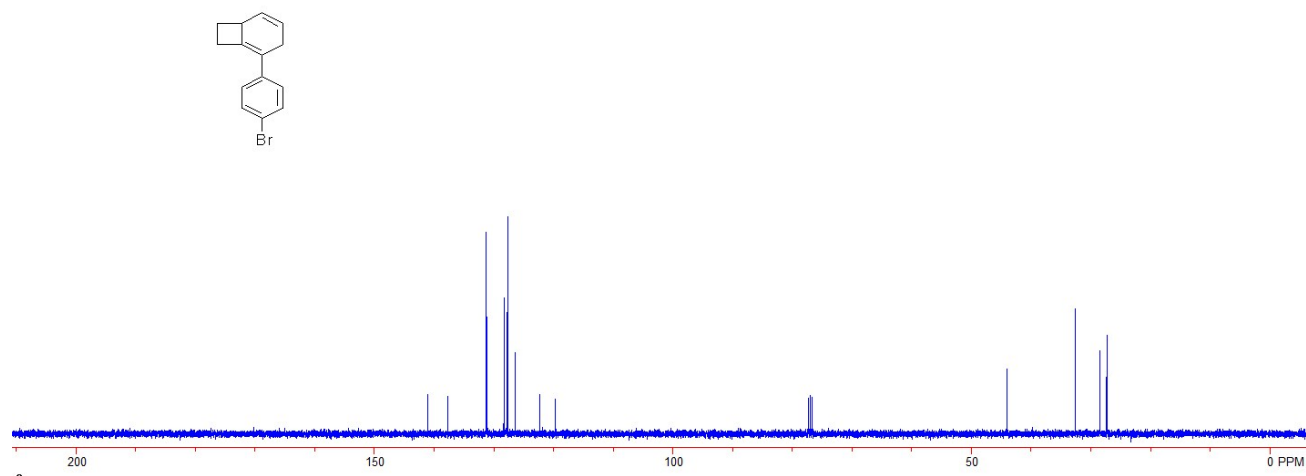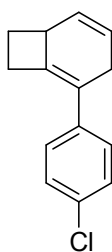

**2-(4-Chlorophenyl)bicyclo[4.2.0]octa-1,4-diene 3h:**

38 mg, yield = 84%. Colorless oil. <sup>1</sup>H NMR (400 MHz, CDCl<sub>3</sub>, TMS): δ 1.79-1.86 (m, 1H, CH<sub>2</sub>), 2.26-2.33 (m, 1H, CH<sub>2</sub>), 2.62-2.67 (m, 1H, CH<sub>2</sub>), 2.71-2.79 (m, 1H, CH<sub>2</sub>), 3.04-3.10 (m, 1H, CH<sub>2</sub>),

3.12-3.22 (m, 1H, CH<sub>2</sub>), 3.52-3.55 (m, 1H, CH), 5.82-5.84 (m, 1H, =CH), 5.88-5.92 (m, 1H, =CH), 7.24 (d, *J* = 8.8 Hz, 2H, Ar), 7.28 (d, *J* = 8.8 Hz, 2H, Ar). <sup>13</sup>C NMR (100 MHz, CDCl<sub>3</sub>, TMS): δ 27.4, 28.5, 32.5, 44.0, 122.3, 126.5, 127.4, 128.27, 128.30, 131.7, 137.3, 140.9. IR (CH<sub>2</sub>Cl<sub>2</sub>) ν 3026, 2942, 1682, 1491, 1092, 1013, 785, 706 cm<sup>-1</sup>. MS (%) *m/z* 216 (M<sup>+</sup>, 55.20), 181 (83.17), 166 (100.00), 152 (54.05), 139 (73.49), 125 (45.21), 99 (17.19), 75 (27.42). HRMS (EI) calcd. for C<sub>14</sub>H<sub>13</sub>Cl: 216.0706, found: 216.0708.

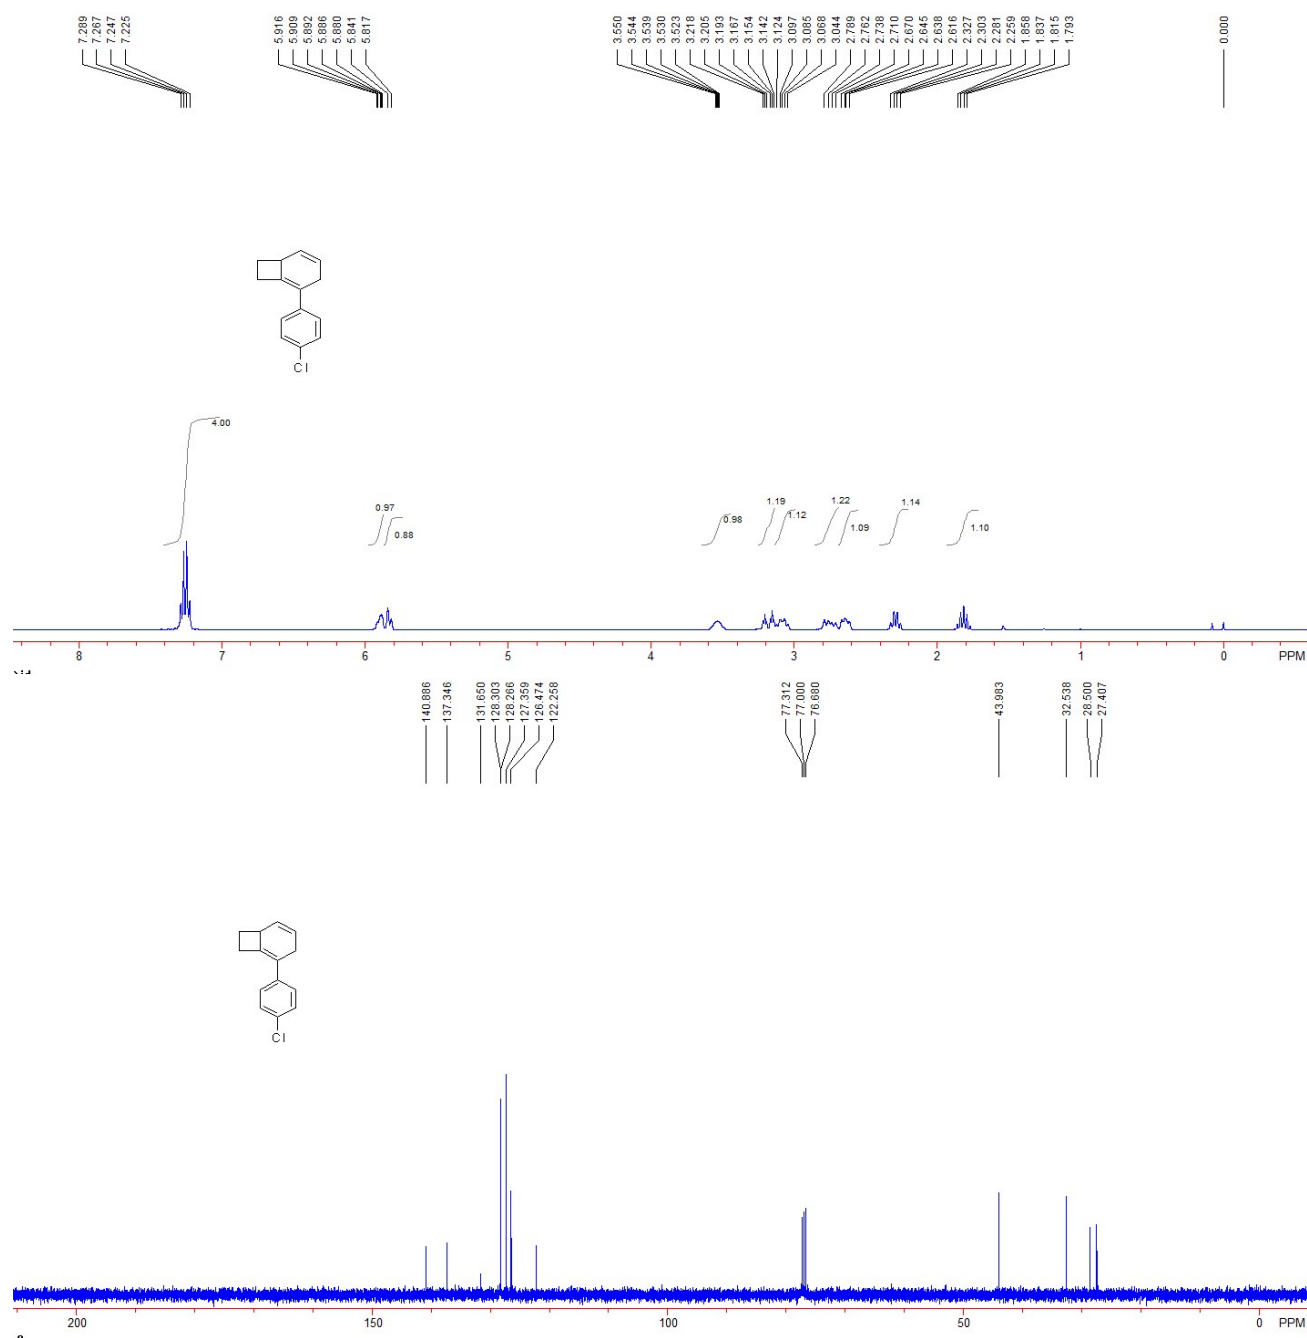

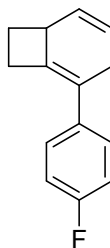

**2-(4-Fluorophenyl)bicyclo[4.2.0]octa-1,4-diene 3i:**

33 mg, yield = 82%. Colorless oil.  $^1\text{H}$  NMR (400 MHz,  $\text{CDCl}_3$ , TMS):  $\delta$  1.77-1.86 (m, 1H,  $\text{CH}_2$ ), 2.25-2.32 (m, 1H,  $\text{CH}_2$ ), 2.60-2.66 (m, 1H,  $\text{CH}_2$ ), 2.71-2.80 (m, 1H,  $\text{CH}_2$ ), 3.02-3.11 (m, 1H,  $\text{CH}_2$ ), 3.14-3.22 (m, 1H,  $\text{CH}_2$ ), 3.51-3.55 (m, 1H, CH), 5.82-5.85 (m, 1H, =CH), 5.88-5.90 (m, 1H, =CH), 6.98-7.03 (m, 2H, Ar), 7.26-7.29 (m, 2H, Ar).  $^{13}\text{C}$  NMR (100 MHz,  $\text{CDCl}_3$ , TMS):  $\delta$  27.7, 28.5, 32.4, 43.9, 115.0 (d,  $J = 20.5$  Hz), 122.3, 126.5, 127.6 (d,  $J = 7.6$  Hz), 128.4, 134.9 (d,  $J = 3.8$  Hz), 139.7, 161.3 (d,  $J = 243.7$  Hz).  $^{19}\text{F}$  NMR (376 MHz,  $\text{CDCl}_3$ ,  $\text{CFCl}_3$ ):  $\delta$  -116.5. IR ( $\text{CH}_2\text{Cl}_2$ )  $\nu$  3025, 2940, 2854, 1507, 1231, 1158, 830, 719, 657  $\text{cm}^{-1}$ . MS (%)  $m/z$  200 ( $\text{M}^+$ , 47.93), 185 (44.83), 172 (100.00), 165 (26.35), 146 (12.50), 133 (19.23), 109 (12.37), 91 (30.84), 77 (13.86). HRMS (EI) calcd. for  $\text{C}_{14}\text{H}_{13}\text{F}$ : 200.1001, found: 200.1002.

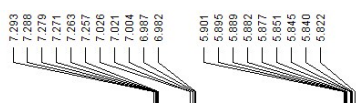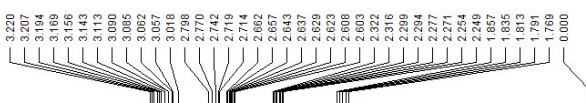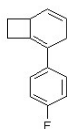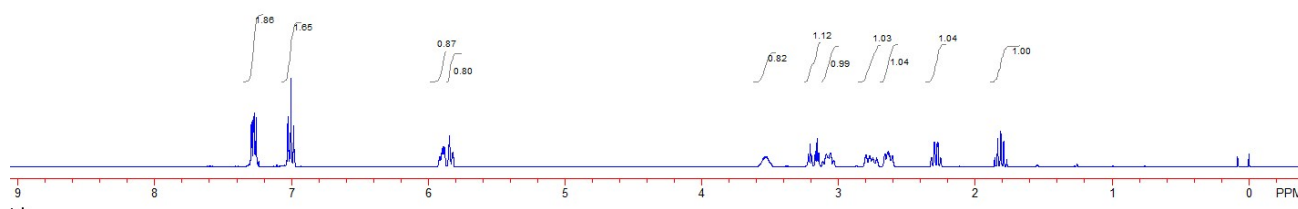

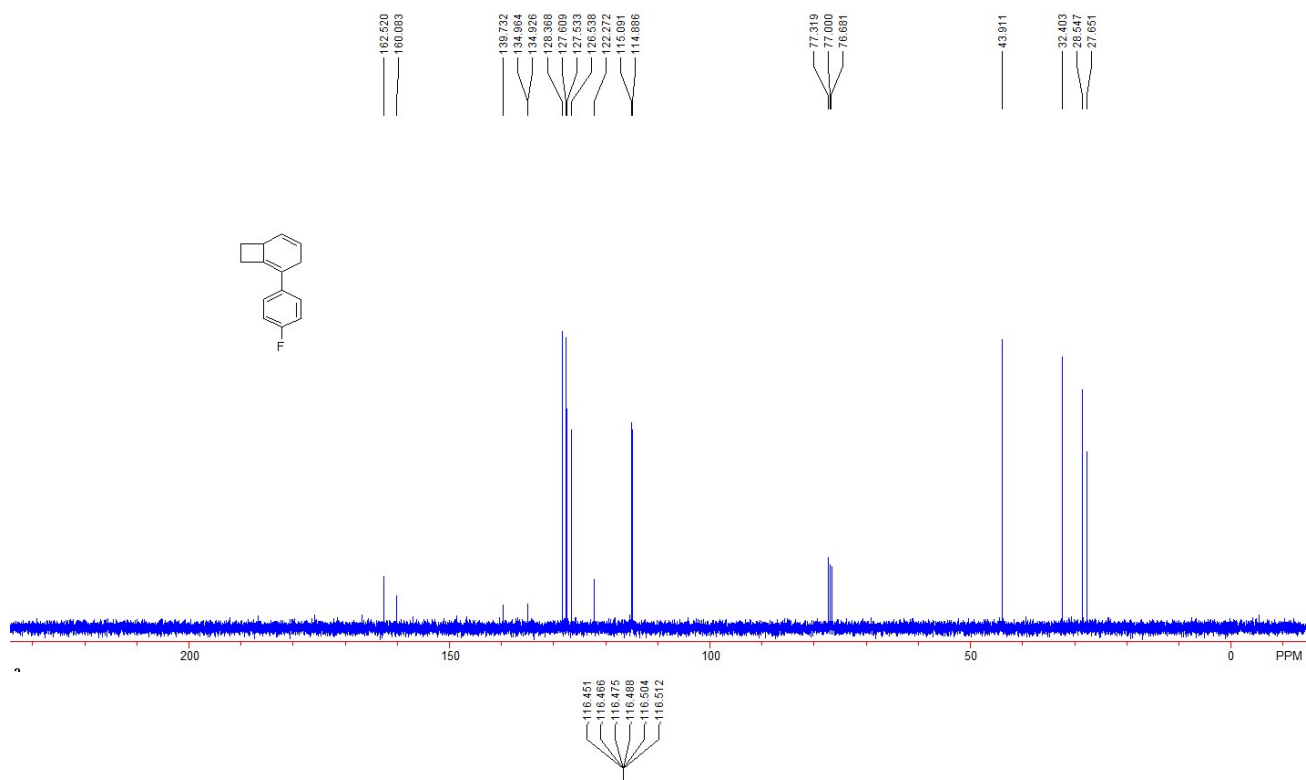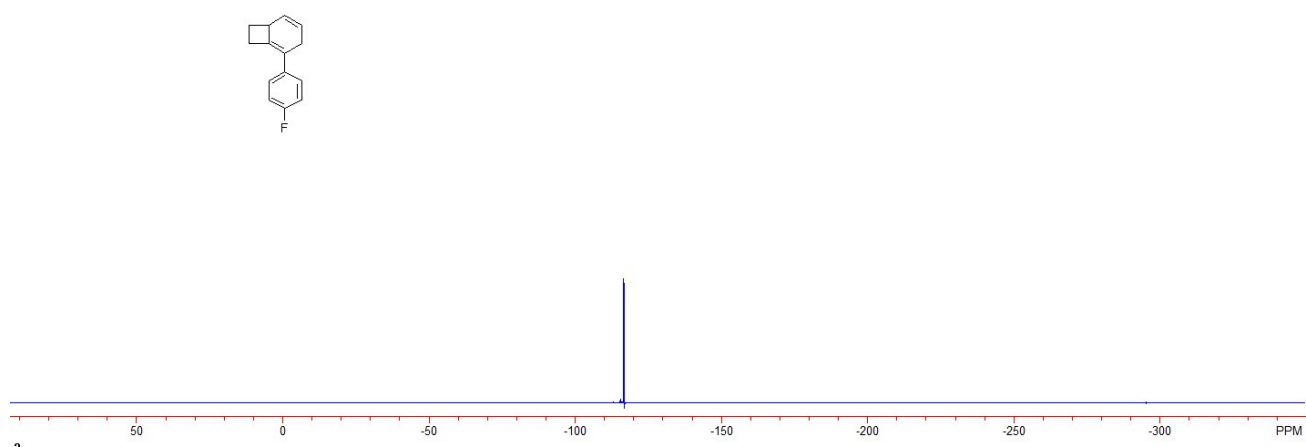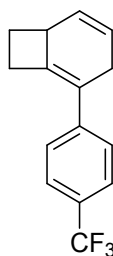

**2-(4-(Trifluoromethyl)phenyl)bicyclo[4.2.0]octa-1,4-diene 3j:**

33 mg, yield = 82%. Colorless oil. <sup>1</sup>H NMR (400 MHz, CDCl<sub>3</sub>, TMS): δ 1.57-1.88 (m, 1H, CH<sub>2</sub>), 2.28-2.35 (m, 1H, CH<sub>2</sub>), 2.64-2.70 (m, 1H, CH<sub>2</sub>), 2.75-2.82 (m, 1H, CH<sub>2</sub>), 3.09-3.17 (m, 1H, CH<sub>2</sub>),

3.20-3.28 (m, 1H, CH<sub>2</sub>), 3.56-3.59 (m, 1H, CH), 5.82-5.86 (m, 1H, =CH), 5.90-5.94 (m, 1H, =CH), 7.41 (d, *J* = 8.4 Hz, 2H, Ar), 7.56 (d, *J* = 8.4 Hz, 2H, Ar). <sup>13</sup>C NMR (100 MHz, CDCl<sub>3</sub>, TMS): δ 27.3, 28.4, 32.7, 44.1, 122.4, 124.4 (q, *J* = 270.7 Hz), 125.1 (q, *J* = 3.7 Hz), 126.2, 126.4, 127.9 (q, *J* = 32.0 Hz), 128.1, 142.5, 143.0. <sup>19</sup>F NMR (376 MHz, CDCl<sub>3</sub>, CFCl<sub>3</sub>): δ -62.4. IR (CH<sub>2</sub>Cl<sub>2</sub>) ν 3029, 2943, 2862, 1614, 1322, 1109, 1068, 1014, 837, 719 cm<sup>-1</sup>. MS (%) *m/z* 250 (M<sup>+</sup>, 56.82), 235 (76.22), 222 (40.51), 209 (100.00), 183 (66.48), 165 (83.26), 152 (42.73), 133 (29.38), 91 (25.23), 78 (24.42). HRMS (EI) calcd. for C<sub>15</sub>H<sub>13</sub>F<sub>3</sub>: 250.0969, found: 250.0970.

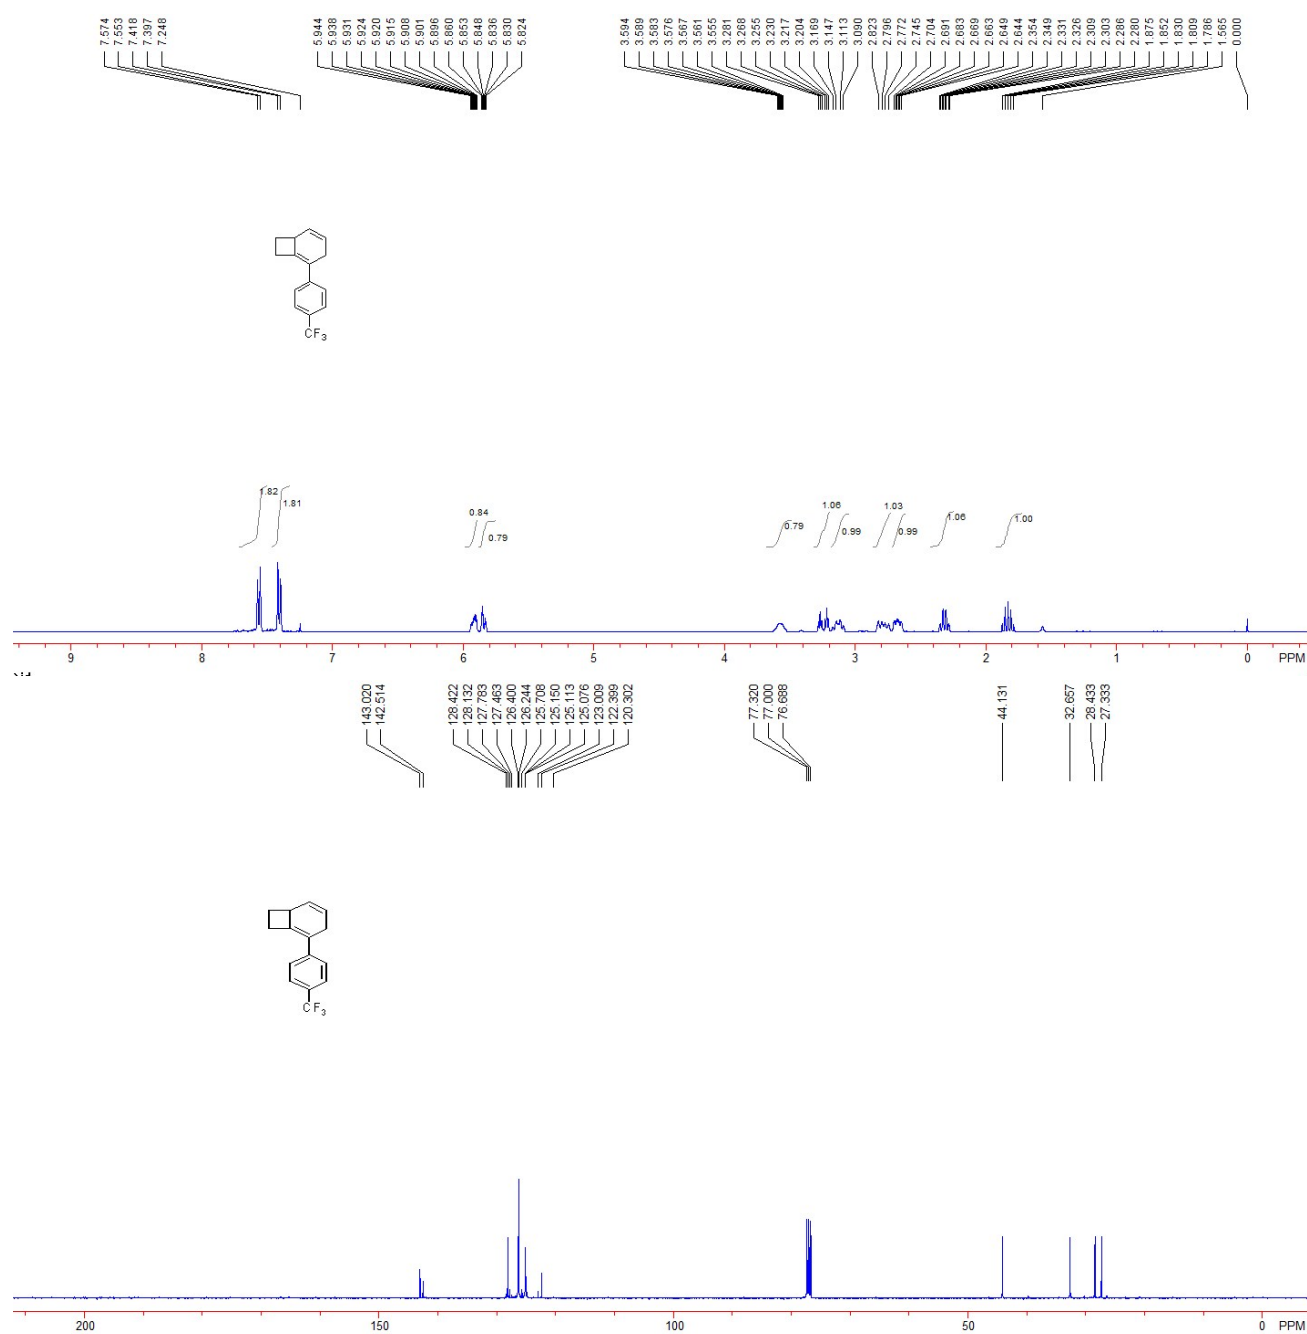

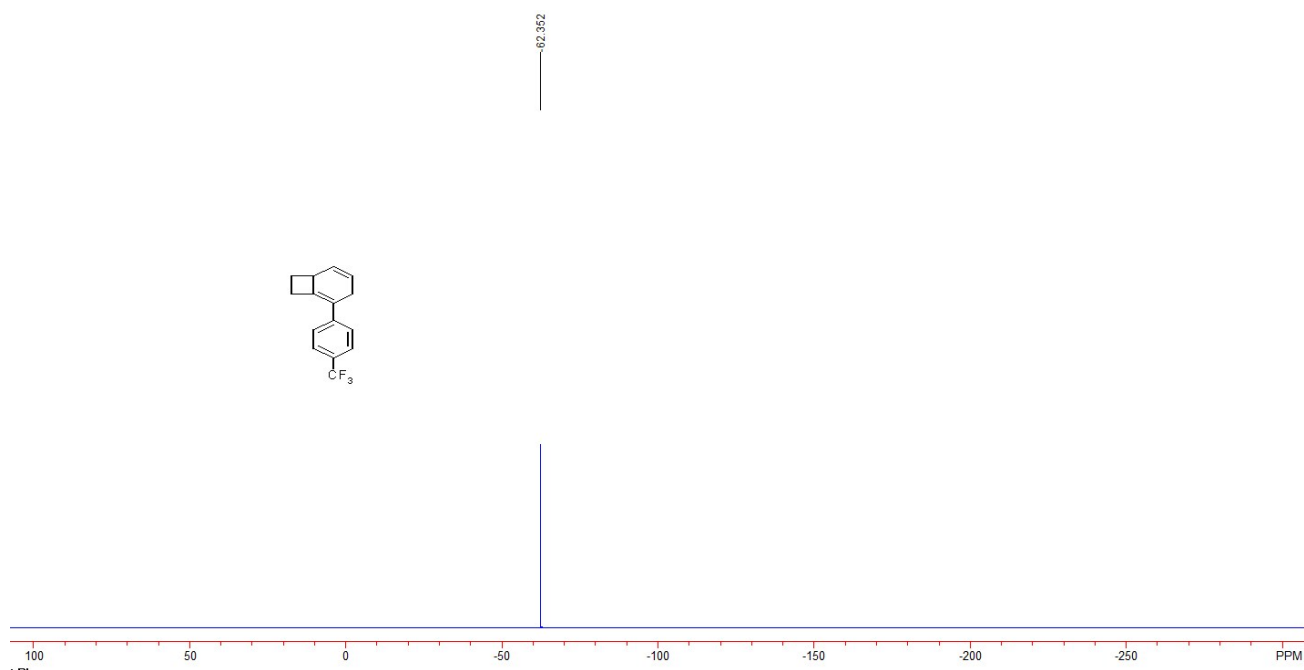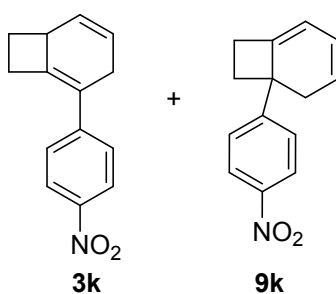

**2-(4-nitrophenyl)bicyclo[4.2.0]octa-1,4-diene **3k** and 6-(4-nitrophenyl)bicyclo[4.2.0]octa-1,3-diene **9k**:**

41 mg, yield = 91%. Mixtures of compound **3k** and **9k** (**3k**:**9k** = 5:1). Colorless oil.  $^1\text{H}$  NMR (400 MHz,  $\text{CDCl}_3$ , TMS):  $\delta$  1.83-1.90 (m, 1.08H,  $\text{CH}_2$ ), 2.21-2.37 (m, 1.82H,  $\text{CH}_2$ ), 2.68-2.79 (m, 1.97H,  $\text{CH}_2$ ), 2.81-2.84 (m, 0.86H,  $\text{CH}_2$ ), 3.17-3.20 (m, 1.02H,  $\text{CH}_2$ ), 3.23-3.30 (m, 1.21H,  $\text{CH}_2$ ), 3.59-3.62 (m, 0.99H, CH), 5.41-5.47 (m, 0.21H, =CH), 5.83-5.86 (m, 1.00H, =CH), 5.90-5.94 (m, 1.20H, =CH), 6.02-6.07 (m, 0.21H, =CH), 7.43-7.49 (m, 2.54H, Ar), 8.15-8.18 (m, 2.45H, Ar).  $^{13}\text{C}$  NMR (100 MHz,  $\text{CDCl}_3$ , TMS):  $\delta$  27.2, 28.2, 29.9, 33.0, 35.6, 37.4, 44.3, 122.1, 122.5, 123.5, 123.6, 126.1, 126.4, 127.8, 127.9, 145.58, 145.64, 145.9, 153.3. IR ( $\text{CH}_2\text{Cl}_2$ )  $\nu$  3028, 2940, 2853, 1756, 1694, 1591, 1511, 1339, 1262, 1205, 1109, 1013, 852, 744, 699  $\text{cm}^{-1}$ . MS (%)  $m/z$  227 ( $\text{M}^+$ , 9.62), 199 (45.85), 179 (50.90), 165 (100.00), 152 (88.70), 141 (35.39), 115 (34.71), 91 (35.85), 77 (34.62). HRMS (EI) calcd. for  $\text{C}_{14}\text{H}_{13}\text{NO}_2$ : 227.0946, found: 227.0950.

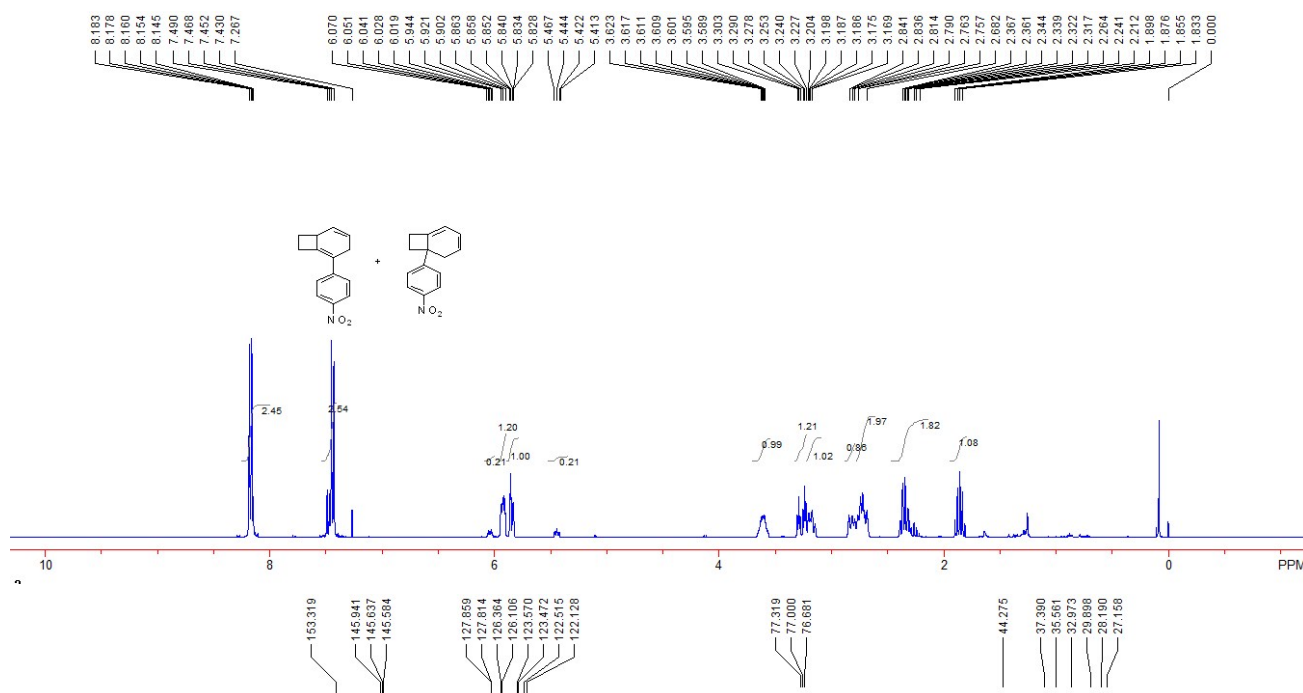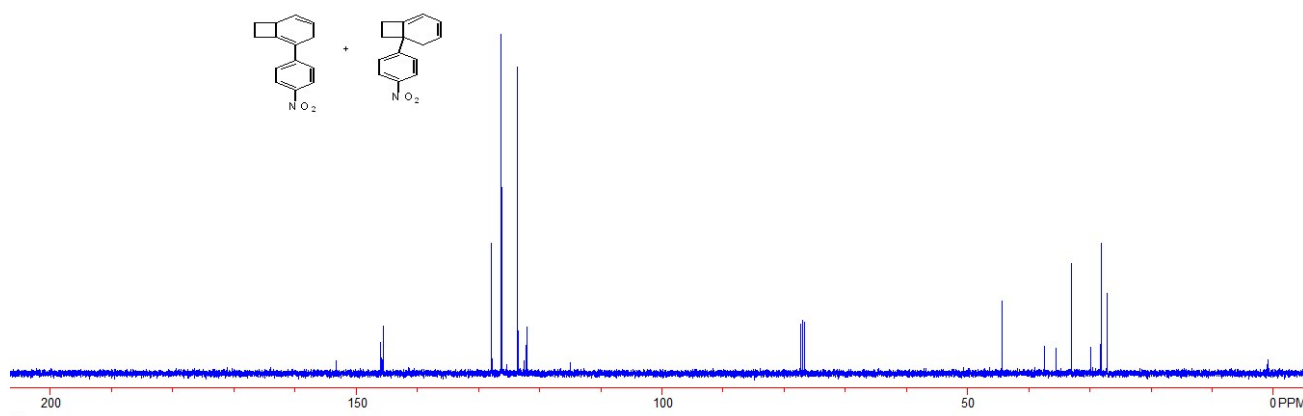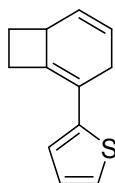

### 2-(Bicyclo[4.2.0]octa-1,4-dien-2-yl)thiophene 3l:

31 mg, yield = 86%. Colorless oil. <sup>1</sup>H NMR (400 MHz, CDCl<sub>3</sub>, TMS): δ 1.79-1.88 (m, 1H, CH<sub>2</sub>), 2.30-2.34 (m, 1H, CH<sub>2</sub>), 2.83-2.91 (m, 2H, CH<sub>2</sub>), 3.10-3.12 (m, 1H, CH<sub>2</sub>), 3.15-3.18 (m, 1H, CH<sub>2</sub>), 3.50-3.51 (m, 1H, CH), 5.82-5.90 (m, 2H, =CH), 6.91 (d, *J* = 3.6 Hz, 1H, Ar), 7.00 (dd, *J*<sub>1</sub> = 5.2 Hz, *J*<sub>2</sub> = 3.6 Hz, 1H, Ar), 7.16 (d, *J* = 5.2 Hz, 1H, Ar). <sup>13</sup>C NMR (100 MHz, CDCl<sub>3</sub>, TMS): δ 28.2, 28.5, 32.6, 43.5, 117.9, 121.6, 123.0, 126.1, 126.8, 128.3, 139.1, 143.3. IR (CH<sub>2</sub>Cl<sub>2</sub>) ν 3023, 2938, 2850, 1626, 1423, 1249, 816, 660 cm<sup>-1</sup>. MS (%) *m/z* 188 (M<sup>+</sup>, 57.62), 187 (100.00), 173 (22.80), 160

(86.51), 153 (38.56), 128 (57.04), 115 (66.32), 97 (51.96), 77 (28.71), 45 (27.86). HRMS (EI) calcd. for  $C_{12}H_{12}S$ : 188.0660, found: 188.0665.

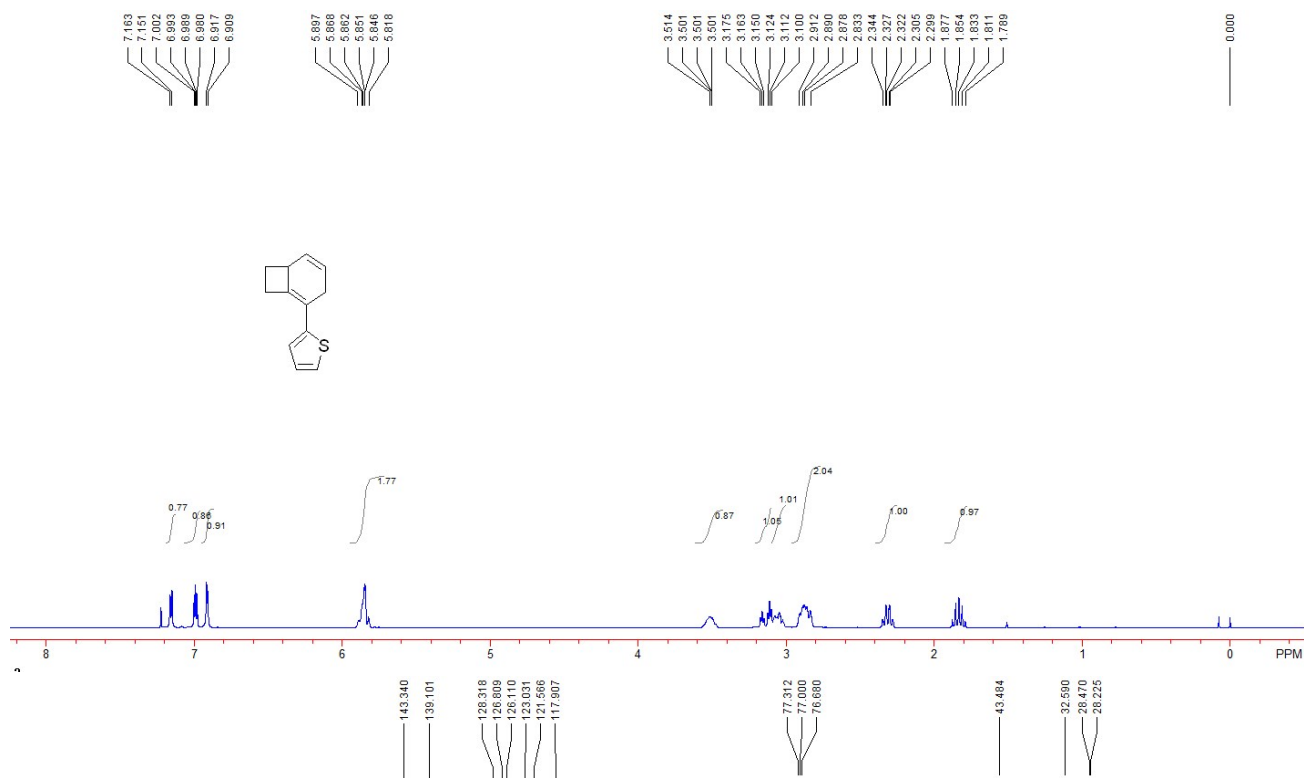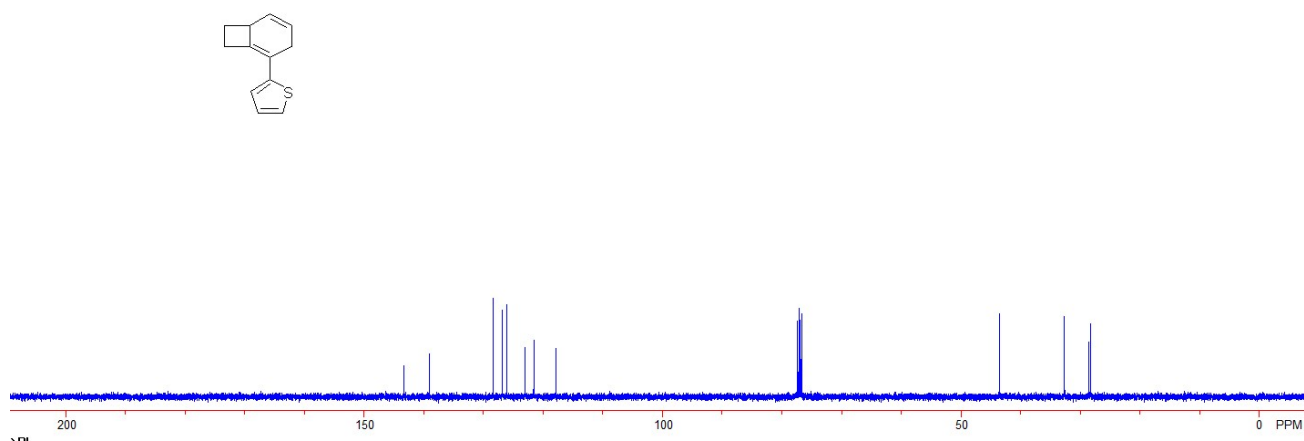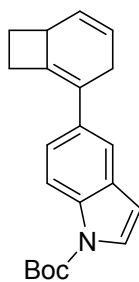

***tert*-Butyl 5-(bicyclo[4.2.0]octa-1,4-dien-2-yl)-1H-indole-1-carboxylate 3m:**

61 mg, yield = 95%. White solid, mp: 69-71 °C. <sup>1</sup>H NMR (400 MHz, CDCl<sub>3</sub>, TMS): δ 1.62 (s, 9H, CH<sub>3</sub>), 1.66-1.86 (m, 1H, CH<sub>2</sub>), 2.25-2.31 (m, 1H, CH<sub>2</sub>), 2.66-2.71 (m, 1H, CH<sub>2</sub>), 2.78-2.86 (m, 1H, CH<sub>2</sub>), 3.08-3.16 (m, 1H, CH<sub>2</sub>), 3.27-3.34 (m, 1H, CH<sub>2</sub>), 3.54-3.57 (m, 1H, CH), 5.83-5.86 (m, 1H, =CH), 5.91-5.95 (m, 1H, =CH), 6.53 (d, *J* = 3.6 Hz, 1H, Ar), 7.31 (d, *J* = 8.8 Hz, 1H, Ar), 7.49 (s, 1H, Ar), 7.56 (d, *J* = 2.8 Hz, 1H, Ar), 7.59 (s, 1H, Ar), 8.06 (d, *J* = 7.6 Hz, 1H, Ar). <sup>13</sup>C NMR (100 MHz, CDCl<sub>3</sub>, TMS): δ 27.9, 28.1, 28.5, 32.5, 43.9, 83.5, 107.4, 114.7, 118.1, 123.2, 123.4, 126.0, 126.8, 128.4, 130.6, 133.7, 138.8, 149.7. IR (CH<sub>2</sub>Cl<sub>2</sub>) ν 2977, 2936, 1730, 1469, 1367, 1134, 1022, 766, 726 cm<sup>-1</sup>. HRMS (ESI) Calcd. for C<sub>21</sub>H<sub>24</sub>NO<sub>2</sub> (M<sup>+</sup>+H) requires 322.1802, found: 322.1791.

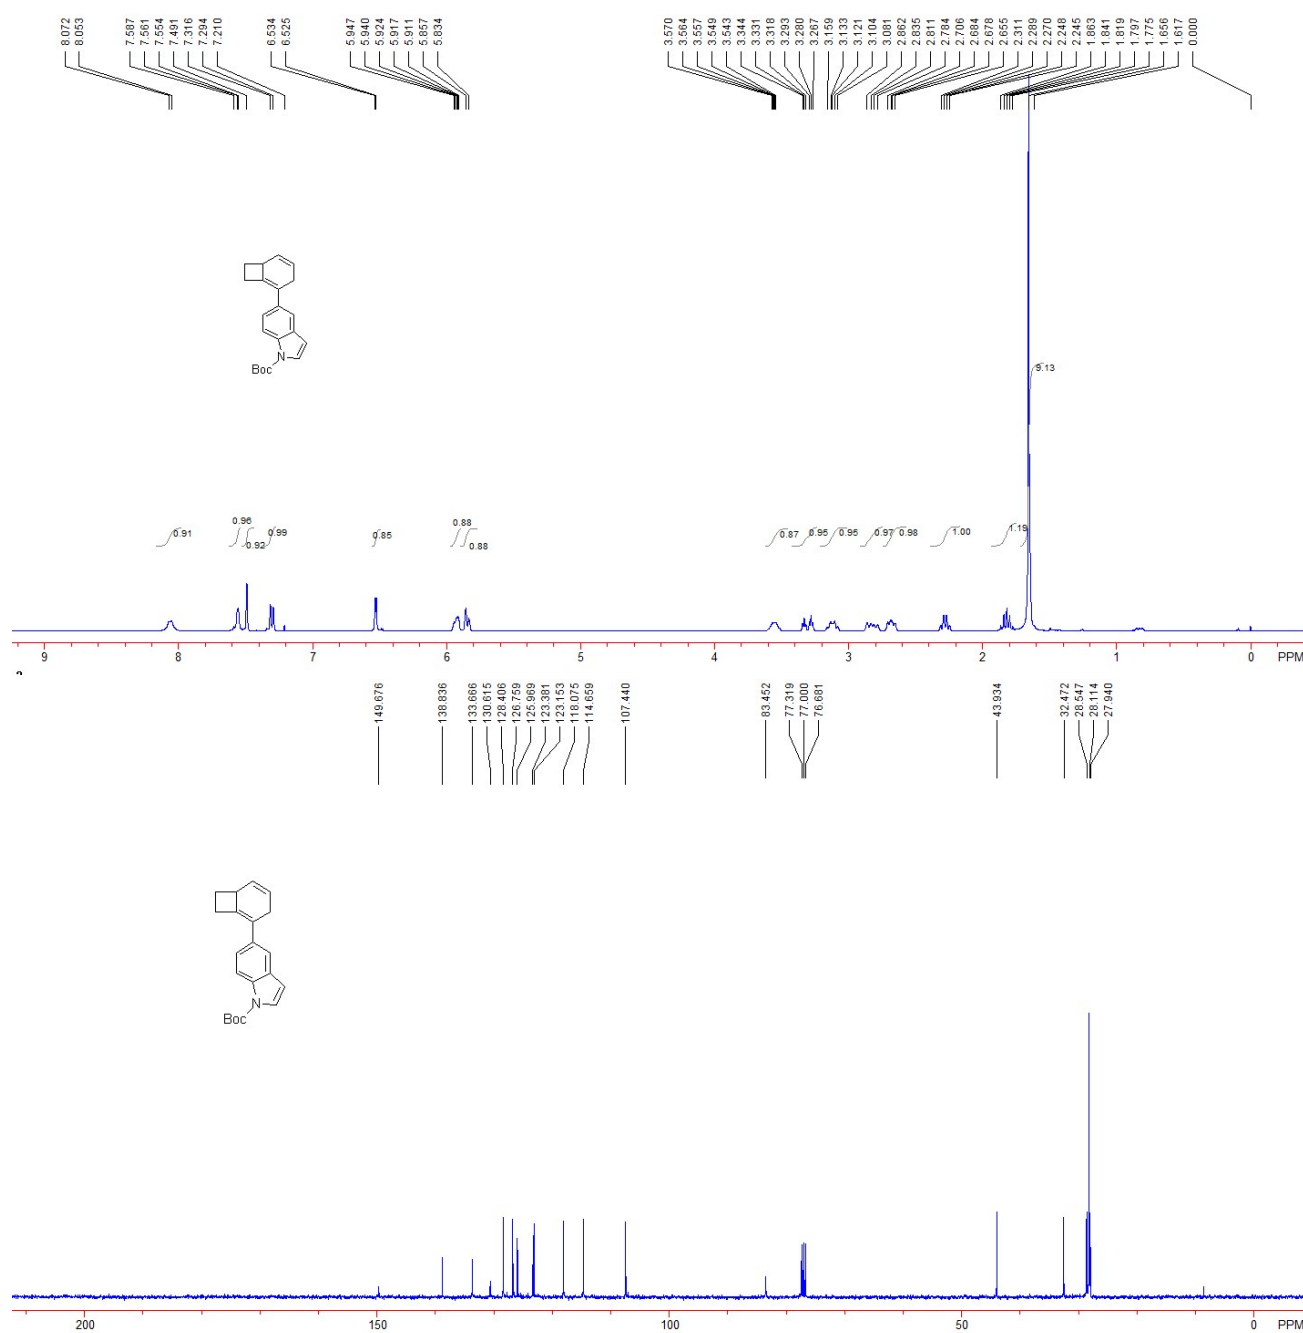

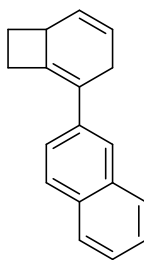

**2-(Bicyclo[4.2.0]octa-1,4-dien-2-yl)naphthalene 3n:**

40 mg, yield = 87%. A white solid. Mp: 79-82 °C.  $^1\text{H}$  NMR (400 MHz,  $\text{CDCl}_3$ , TMS):  $\delta$  1.82-1.86 (m, 1H,  $\text{CH}_2$ ), 2.29-2.32 (m, 1H,  $\text{CH}_2$ ), 2.72-2.78 (m, 1H,  $\text{CH}_2$ ), 2.87-2.89 (m, 1H,  $\text{CH}_2$ ), 3.17-3.20 (m, 1H,  $\text{CH}_2$ ), 3.36-3.42 (m, 1H,  $\text{CH}_2$ ), 3.58-3.59 (m, 1H, CH), 5.85-5.88 (m, 1H, =CH), 5.95-5.97 (m, 1H, =CH), 7.39-7.45 (m, 2H, Ar), 7.49-7.51 (m, 1H, Ar), 7.73-7.80 (m, 4H, Ar).  $^{13}\text{C}$  NMR (100 MHz,  $\text{CDCl}_3$ , TMS):  $\delta$  27.6, 28.4, 32.7, 44.1, 123.3, 124.0, 125.3, 125.4, 125.9, 126.7, 127.46, 127.52, 127.9, 128.3, 132.1, 133.6, 136.5, 140.9. IR ( $\text{CH}_2\text{Cl}_2$ )  $\nu$  3053, 2938, 2851, 1626, 1504, 853, 814, 743, 657  $\text{cm}^{-1}$ . MS (%)  $m/z$  232 ( $\text{M}^+$ , 44.26), 215 (38.28), 204 (100.00), 165 (7.80), 141 (32.84), 115 (13.13), 101 (23.36), 89 (8.84), 77 (8.30). HRMS (EI) calcd. for  $\text{C}_{18}\text{H}_{16}$ : 232.1252, found: 232.1258.

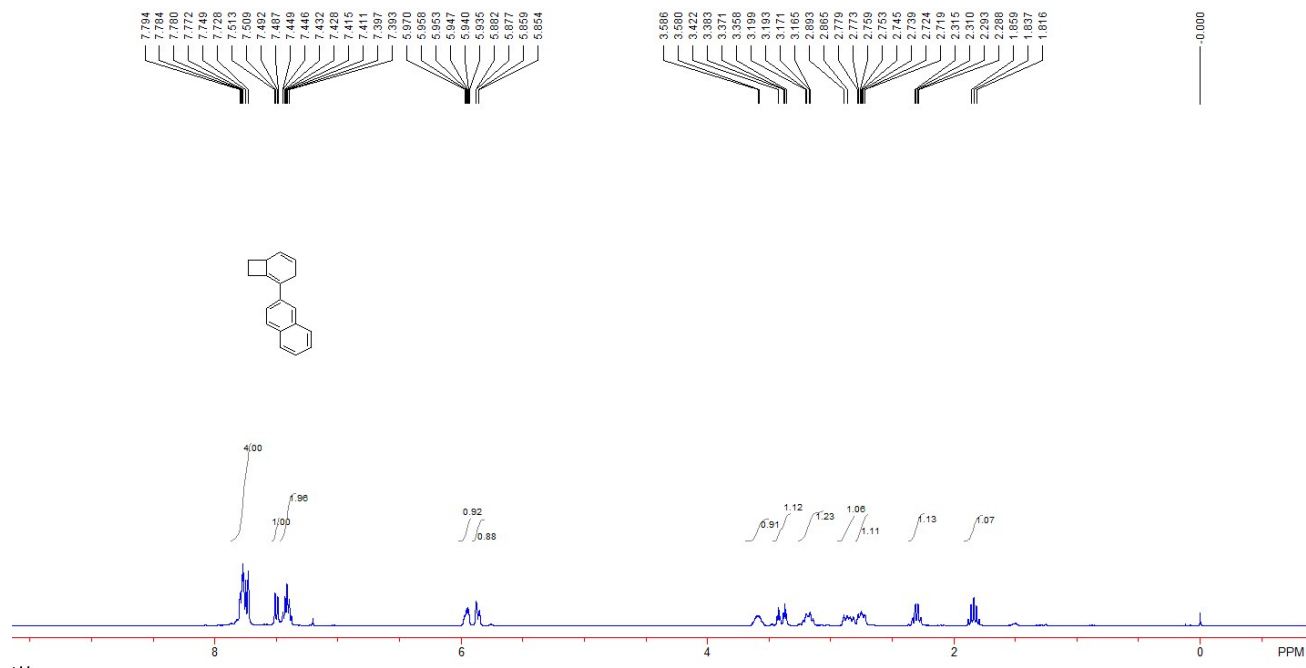

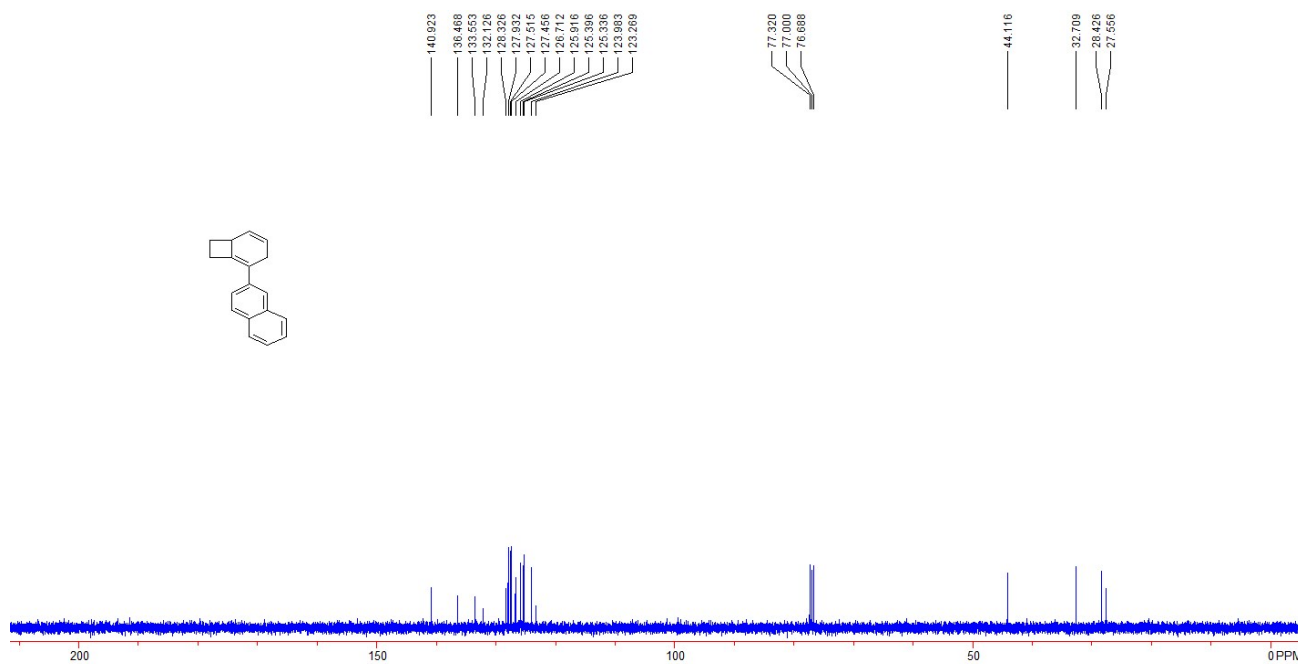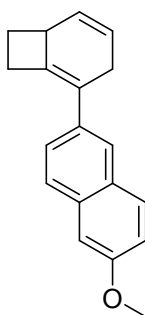

**2-(Bicyclo[4.2.0]octa-1,4-dien-2-yl)-6-methoxynaphthalene 3o:**

49 mg, yield = 94%. White solid, mp: 98-100 °C. <sup>1</sup>H NMR (400 MHz, CDCl<sub>3</sub>, TMS): δ 1.81-1.85 (m, 1H, CH<sub>2</sub>), 2.25-2.32 (m, 1H, CH<sub>2</sub>), 2.71-2.87 (m, 2H, CH<sub>2</sub>), 3.12-3.20 (m, 1H, CH<sub>2</sub>), 3.24-3.58 (m, 1H, CH<sub>2</sub>), 3.57-3.58 (m, 1H, CH), 3.86 (s, 3H, CH<sub>3</sub>), 5.84-5.87 (m, 1H, =CH), 5.92-5.93 (m, 1H, =CH), 7.07 (s, 1H, Ar), 7.10 (d, *J* = 8.4 Hz, 1H, Ar), 7.46 (d, *J* = 8.8 Hz, 1H, Ar), 7.63-7.68 (m, 3H, Ar). <sup>13</sup>C NMR (100 MHz, CDCl<sub>3</sub>, TMS): δ 27.5, 28.4, 32.6, 44.0, 55.2, 105.5, 118.7, 123.1, 125.8, 126.4, 126.7, 128.4, 129.0, 129.4, 133.1, 134.3, 139.9, 157.3. IR (CH<sub>2</sub>Cl<sub>2</sub>) ν 3022, 2937, 2838, 1601, 1484, 1201, 1031, 850, 654 cm<sup>-1</sup>. MS (%) *m/z* 262 (M<sup>+</sup>, 100.00), 247 (28.37), 234 (72.22), 215 (26.88), 202 (23.29), 191 (34.75), 171 (33.65), 117 (17.52), 101 (16.81). HRMS (EI) calcd. for C<sub>19</sub>H<sub>18</sub>O: 262.1358, found: 262.1356.

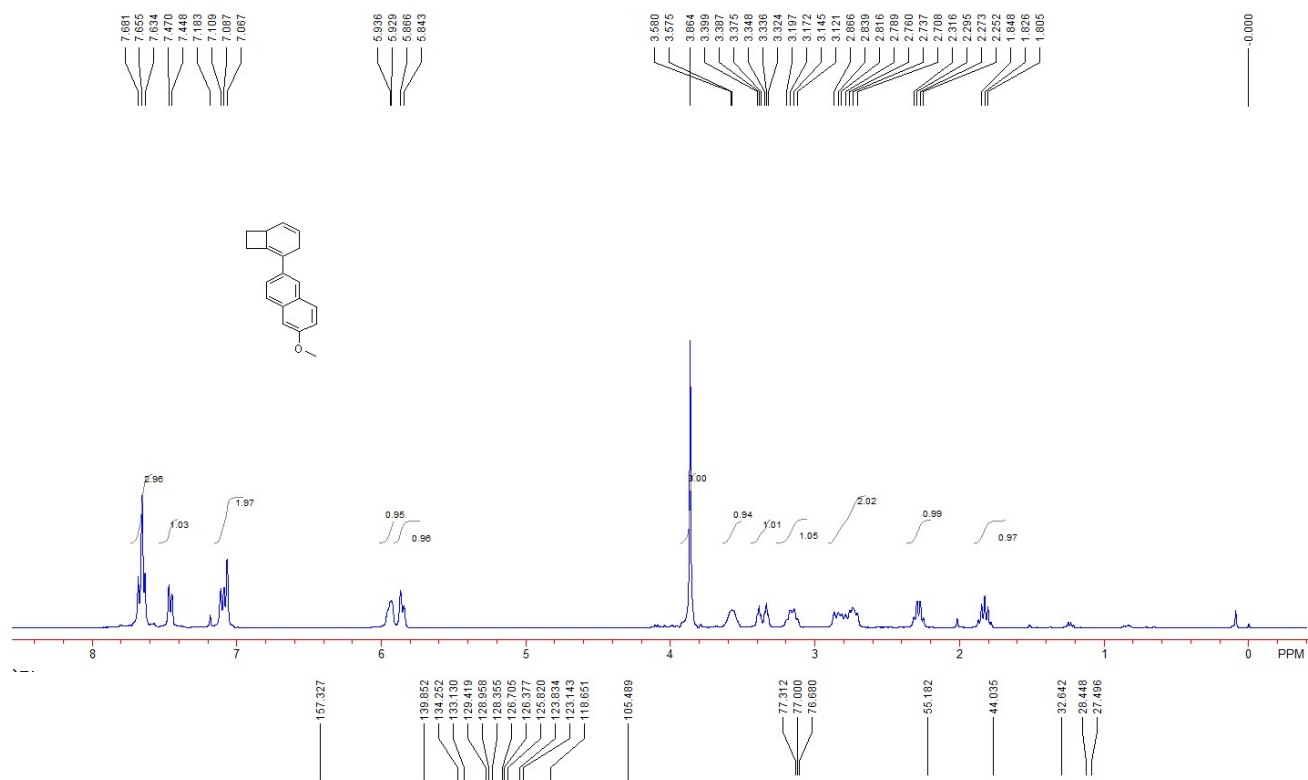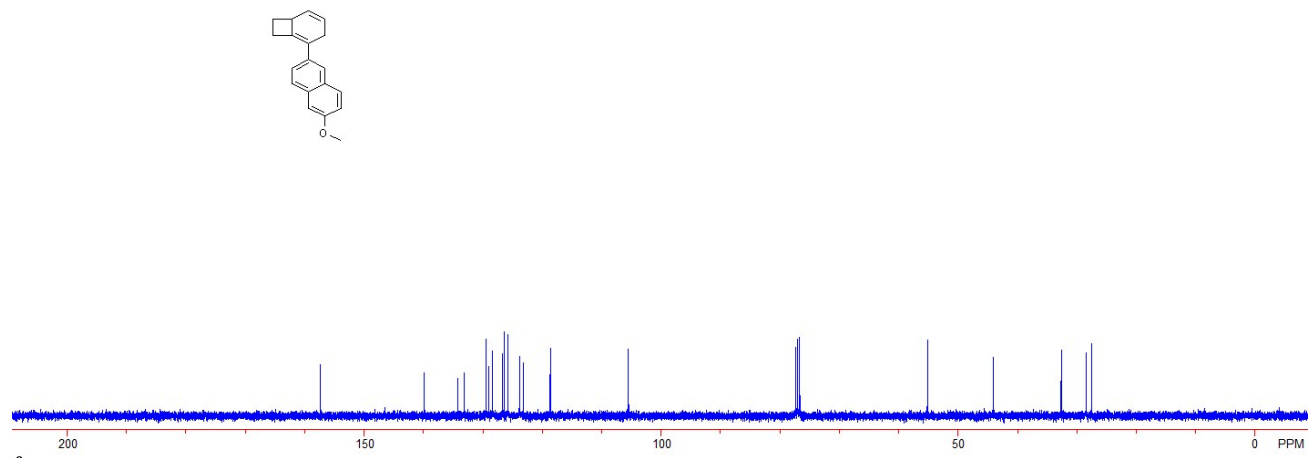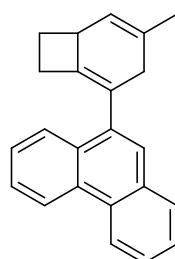

**9-(4-Methylbicyclo[4.2.0]octa-1,4-dien-2-yl)phenanthrene 3p:**

41 mg, yield = 69%. Colorless oil. <sup>1</sup>H NMR (400 MHz, CDCl<sub>3</sub>, TMS): δ 1.24-1.28 (m, 3H, CH<sub>3</sub>), 2.05-2.13 (m, 1H, CH<sub>2</sub>), 2.42-2.47 (m, 3H, CH<sub>2</sub>), 2.57-2.69 (m, 2H, CH<sub>2</sub>), 2.84-2.89 (m, 1H, CH),

5.68 (d,  $J = 2.4$  Hz, 1H, =CH), 7.55-7.66 (m, 5H, Ar), 7.85 (d,  $J = 8.0$  Hz, 2H, Ar), 8.09 (d,  $J = 8.0$  Hz, 2H, Ar), 8.66 (d,  $J = 8.4$  Hz, 2H, Ar), 8.70 (d,  $J = 8.0$  Hz, 2H, Ar).  $^{13}\text{C}$  NMR (100 MHz,  $\text{CDCl}_3$ , TMS):  $\delta$  21.5, 29.2, 30.4, 30.5, 31.3, 122.5, 122.7, 125.8, 126.2, 126.3, 126.6, 127.0, 128.4, 129.9, 130.4, 131.0, 131.8, 133.9, 136.1, 139.7, 140.4. IR ( $\text{CH}_2\text{Cl}_2$ )  $\nu$  2951, 2920, 2826, 1698, 1450, 1235, 906, 746, 726  $\text{cm}^{-1}$ . MS (%)  $m/z$  296 ( $\text{M}^+$ , 100.00), 281 (46.73), 265 (47.96), 253 (44.49), 239 (25.02), 215 (17.20), 133 (24.74), 126 (24.11), 120 (13.20), 79 (5.88). HRMS (EI) calcd. for  $\text{C}_{23}\text{H}_{20}$ : 296.1565, found: 296.1563.

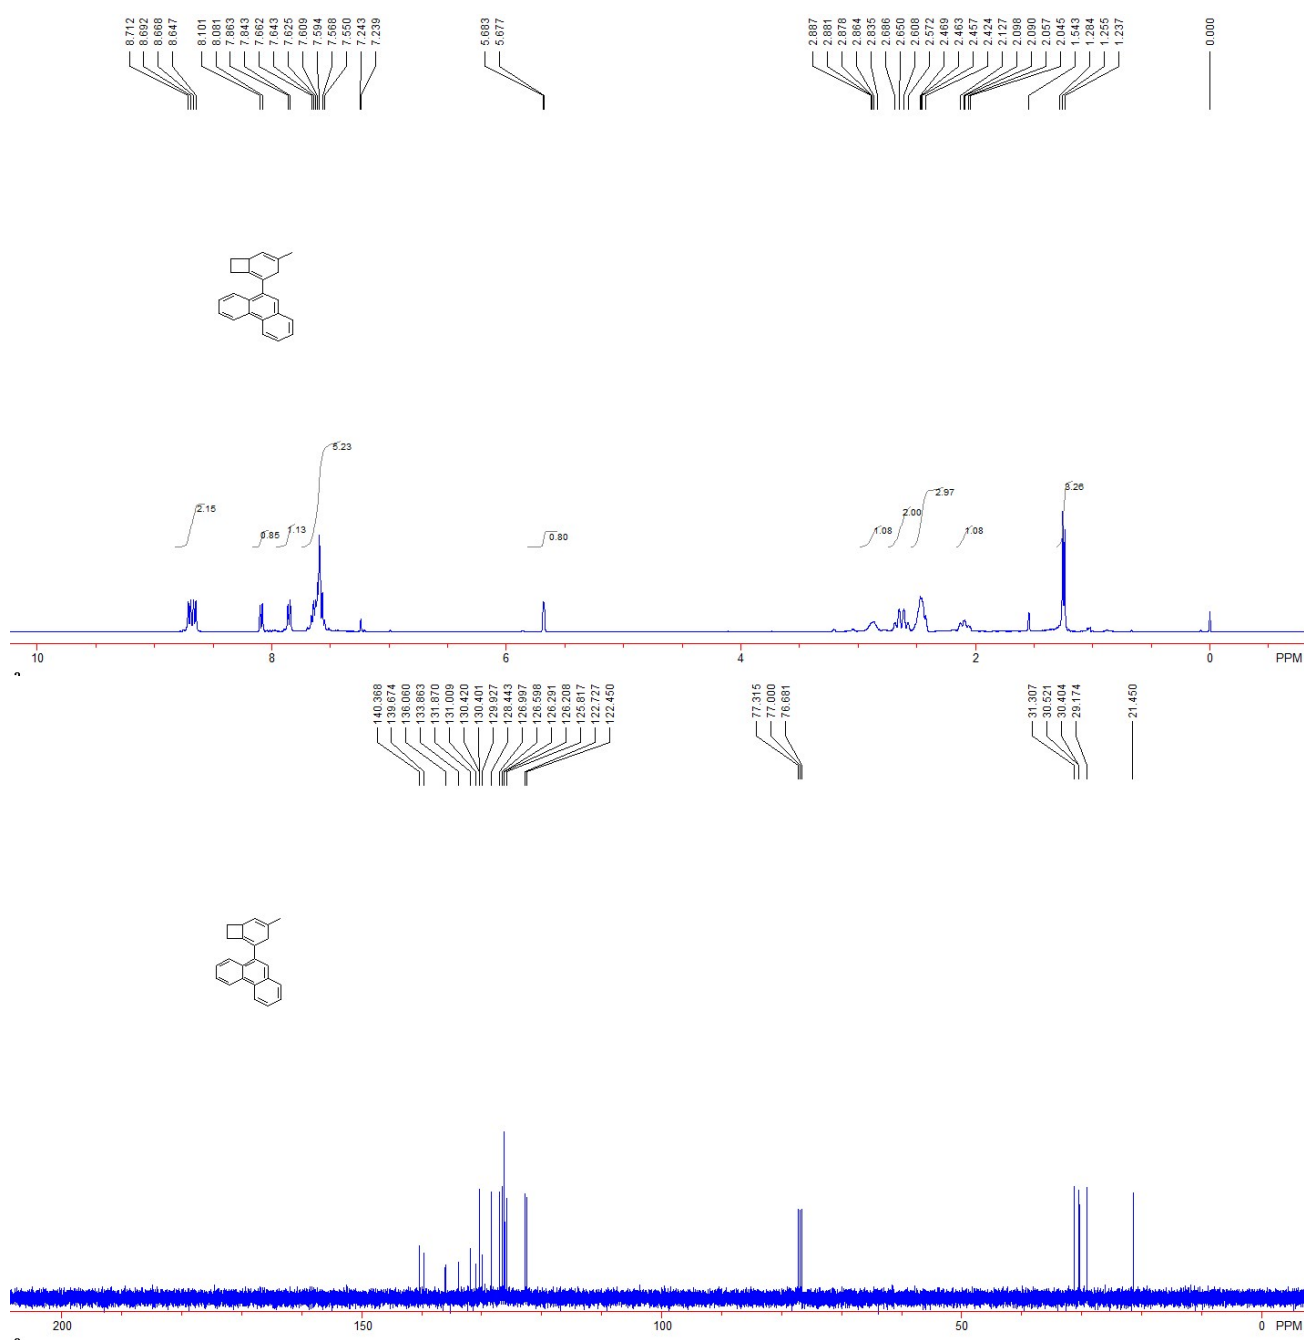

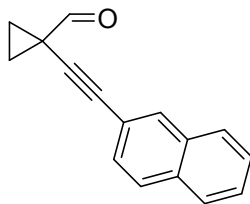

**1-(Naphthalen-2-ylethynyl)cyclopropane-1-carbaldehyde s-7b:**

Colorless oil.  $^1\text{H}$  NMR (400 MHz,  $\text{CDCl}_3$ , TMS):  $\delta$  1.56-1.60 (m, 2H,  $\text{CH}_2$ ), 1.62-1.66 (m, 2H,  $\text{CH}_2$ ), 7.44-7.48 (m, 3H, Ar), 7.74-7.80 (m, 3H, Ar), 7.97 (s, 1H, Ar), 9.46 (s, 1H,  $\text{CH}=\text{O}$ ).  $^{13}\text{C}$  NMR (100 MHz,  $\text{CDCl}_3$ , TMS):  $\delta$  20.8, 24.4, 81.2, 87.9, 120.0, 126.5, 127.6, 127.7, 127.9, 128.5, 131.7, 132.7, 133.8, 198.1. IR ( $\text{CH}_2\text{Cl}_2$ )  $\nu$  3056, 2827, 1715, 1257, 1180, 1126, 895, 817, 746  $\text{cm}^{-1}$ . MS (%)  $m/z$  220 ( $\text{M}^+$ , 100.00), 191 (84.42), 176 (7.68), 165 (33.08), 152 (10.08), 115 (5.13), 110 (3.51), 82 (10.58), 63 (6.64). HRMS (EI) calcd. for  $\text{C}_{16}\text{H}_{12}\text{O}$ : 220.0888, found: 220.0892.

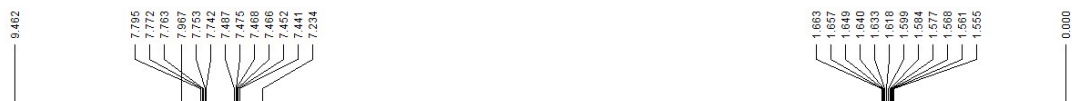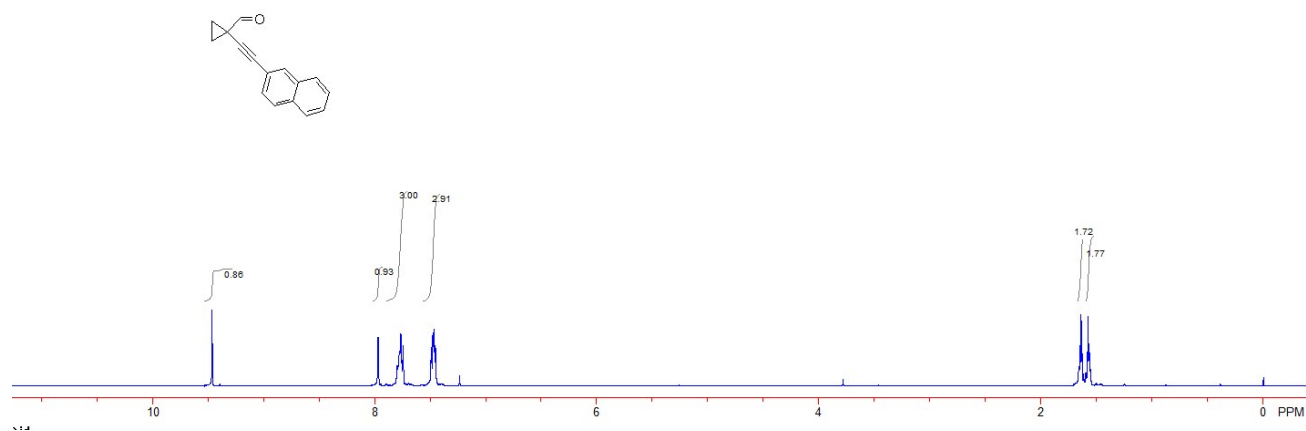

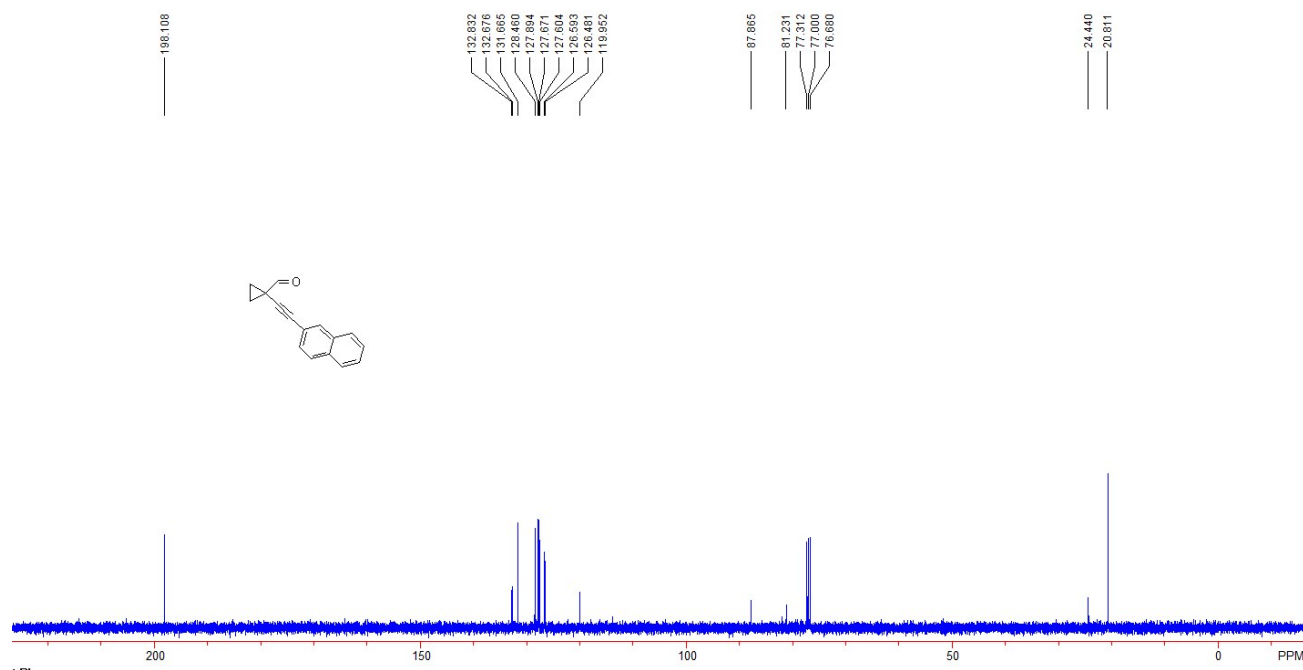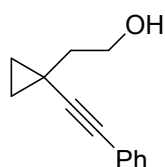

### 2-(1-(Phenylethynyl)cyclopropyl)ethan-1-ol **s-9c**:

Colorless oil. <sup>1</sup>H NMR (400 MHz, CDCl<sub>3</sub>, TMS): δ 0.74 (dd,  $J_1 = 6.4$  Hz,  $J_2 = 4.4$  Hz, 2H, CH<sub>2</sub>), 1.02 (dd,  $J_1 = 6.4$  Hz,  $J_2 = 4.4$  Hz, 2H, CH<sub>2</sub>), 1.69 (t,  $J = 6.4$  Hz, 2H, CH<sub>2</sub>), 2.22 (s, 1H, OH), 3.93 (t,  $J = 6.4$  Hz, 2H, CH<sub>2</sub>), 7.24-7.28 (m, 3H, Ar), 7.34-7.37 (m, 2H, Ar). <sup>13</sup>C NMR (100 MHz, CDCl<sub>3</sub>, TMS): δ 9.6, 15.3, 40.6, 61.9, 77.4, 94.1, 123.4, 127.6, 128.1, 131.5. IR (CH<sub>2</sub>Cl<sub>2</sub>) ν 3059, 2922, 2849, 1629, 1601, 1498, 1388, 1265, 1031, 850, 806 cm<sup>-1</sup>. MS (%)  $m/z$  186 (M<sup>+</sup>, 26.28), 171 (36.63), 155 (94.88), 141 (66.23), 128 (73.51), 115 (100.00), 102 (22.93), 91 (26.91), 77 (58.21). HRMS (EI) calcd. for C<sub>13</sub>H<sub>14</sub>O: 186.1045, found: 186.1044.

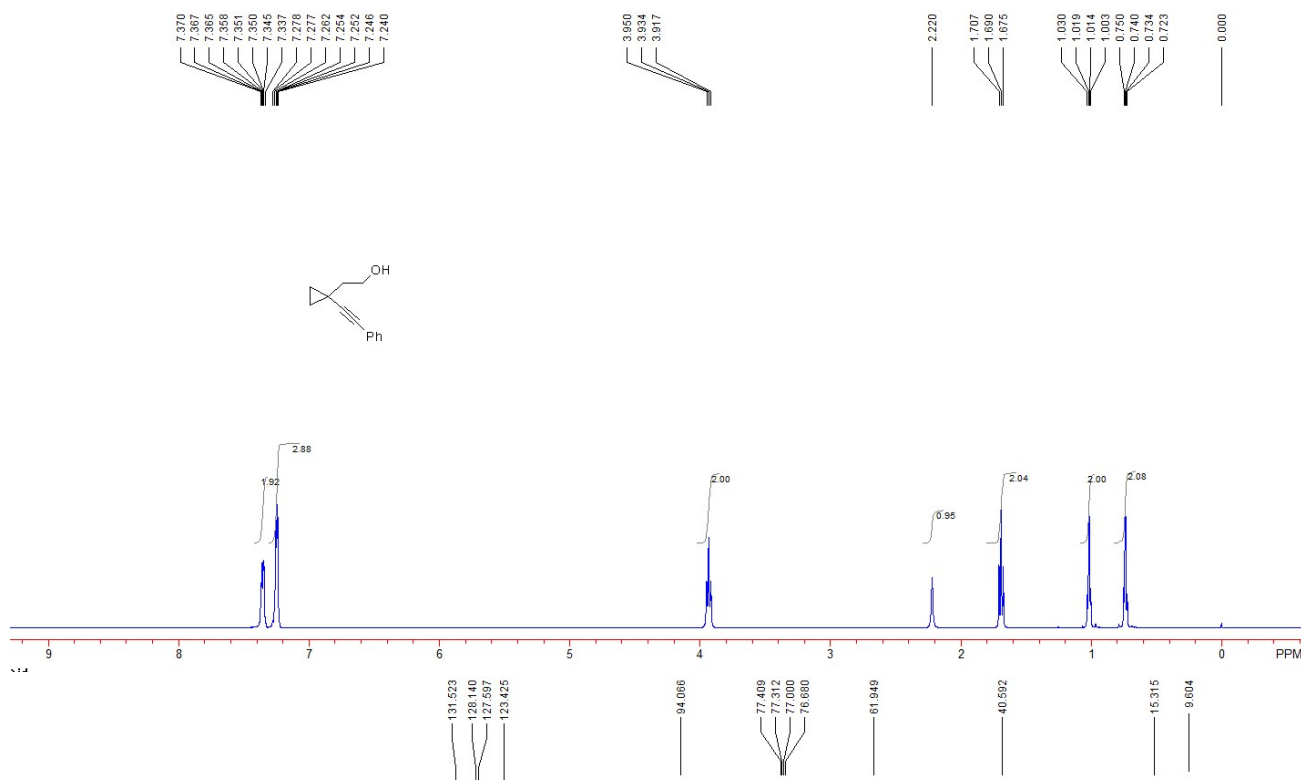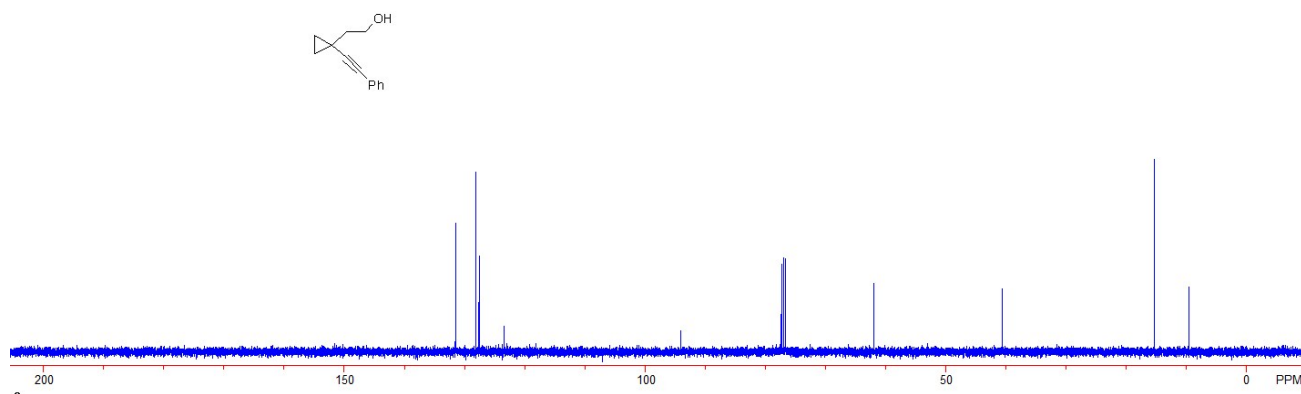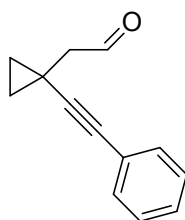

### 2-(1-(Phenylethynyl)cyclopropyl)acetaldehyde s-10c:

Colorless oil. <sup>1</sup>H NMR (400 MHz, CDCl<sub>3</sub>, TMS): δ 0.84 (dd,  $J_1 = 6.0$  Hz,  $J_2 = 4.4$  Hz, 2H, CH<sub>2</sub>), 1.17 (dd,  $J_1 = 6.4$  Hz,  $J_2 = 4.8$  Hz, 2H, CH<sub>2</sub>), 2.44 (s, 2H, CH<sub>2</sub>), 7.25-7.26 (m, 3H, Ar), 7.35-7.37 (m, 2H, Ar), 9.96 (t,  $J = 2.0$  Hz, 1H, CH=O). <sup>13</sup>C NMR (100 MHz, CDCl<sub>3</sub>, TMS): δ 7.6, 15.2, 51.0, 77.7,

92.7, 123.1, 122.8, 128.1, 131.6, 201.5. IR (CH<sub>2</sub>Cl<sub>2</sub>)  $\nu$  3059, 3011, 2919, 1703, 1491, 1280, 915, 755, 691 cm<sup>-1</sup>. MS (%) m/z 184 (M<sup>+</sup>, 22.96), 155 (81.54), 141 (100.00), 127 (51.33), 115 (77.22), 102 (26.95), 91 (17.22), 77 (46.51), 63 (13.49). HRMS (EI) calcd. for C<sub>13</sub>H<sub>12</sub>O: 184.0888, found: 184.0885.

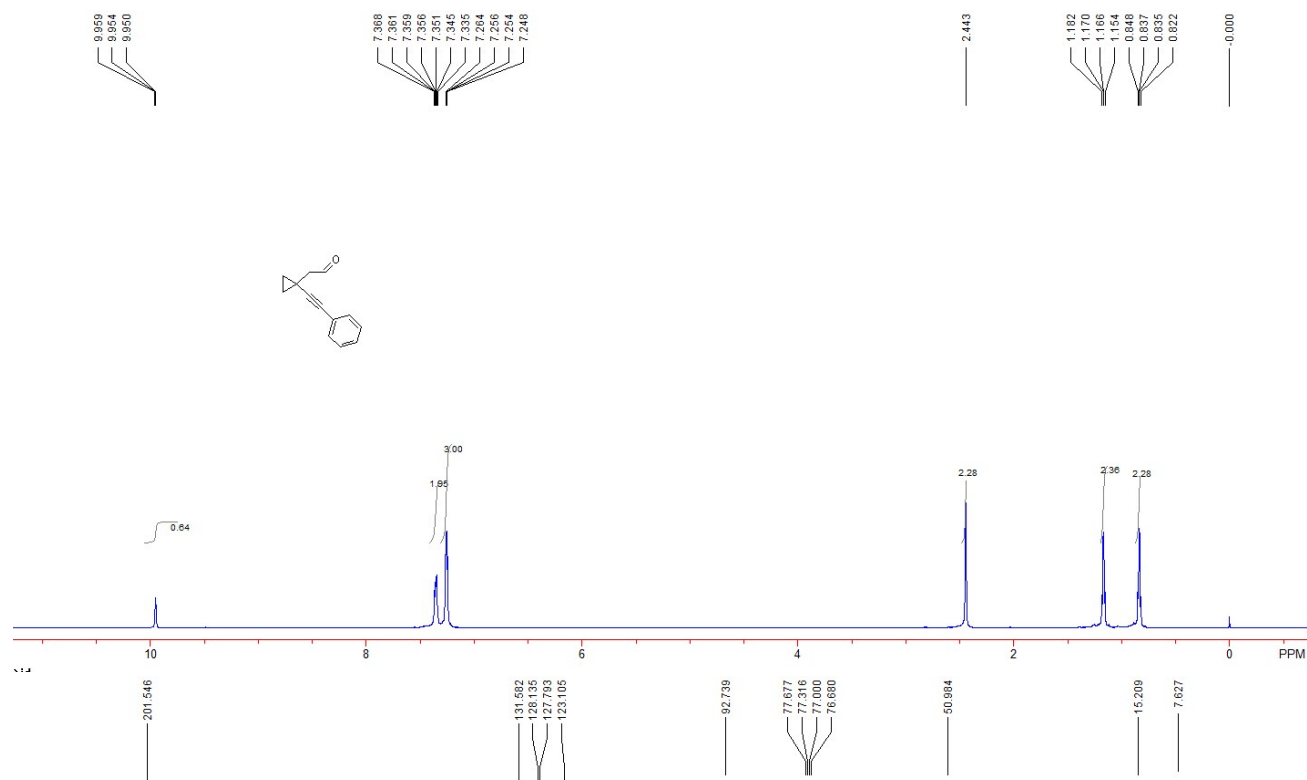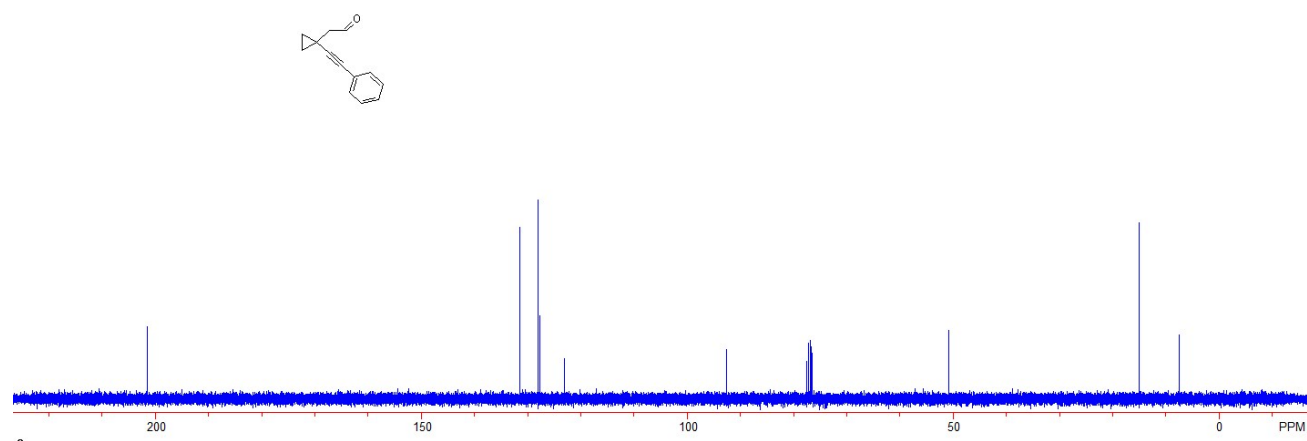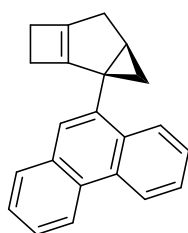

S86

**9-(Tricyclo[4.2.0.0<sup>2,4</sup>]oct-1(6)-en-2-yl)phenanthrene 4a:**

42 mg, yield = 75%. A white solid. Mp: 75-78 °C. <sup>1</sup>H NMR (400 MHz, CDCl<sub>3</sub>, TMS): δ 0.82-0.87 (m, 1H, CH<sub>2</sub>), 1.25-1.45 (m, 1H, CH<sub>2</sub>), 2.10-2.15 (m, 1H, CH), 2.40-2.63 (m, 5H, CH<sub>2</sub>), 2.90-2.94 (m, 1H, CH<sub>2</sub>), 7.12-7.56 (m, 2H, Ar), 7.59-7.63 (m, 2H, Ar), 7.66 (s, 1H, Ar), 7.72-7.83 (m, 1H, Ar), 8.31-8.34 (m, 1H, Ar), 8.59 (d, *J* = 8.0 Hz, 1H, Ar), 8.65-8.68 (m, 1H, Ar). <sup>13</sup>C NMR (100 MHz, CDCl<sub>3</sub>, TMS): δ 24.1, 26.7, 28.3, 28.5, 35.2, 37.9, 122.4, 122.8, 126.1, 126.45, 126.54, 126.7, 128.2, 129.8, 130.6, 131.8, 132.8, 135.5, 145.1, 156.2. IR (CH<sub>2</sub>Cl<sub>2</sub>) ν 3056, 2917, 2836, 1705, 1264, 895, 735, 726, 703 cm<sup>-1</sup>. MS (%) *m/z* 282 (100.00), 267 (29.68), 254 (100.00), 239 (12.58), 191 (73.03), 178 (7.43), 165 (10.31), 126 (32.74), 120.12.18. HRMS (EI) calcd. for C<sub>22</sub>H<sub>18</sub>: 282.1409, found: 282.1414.

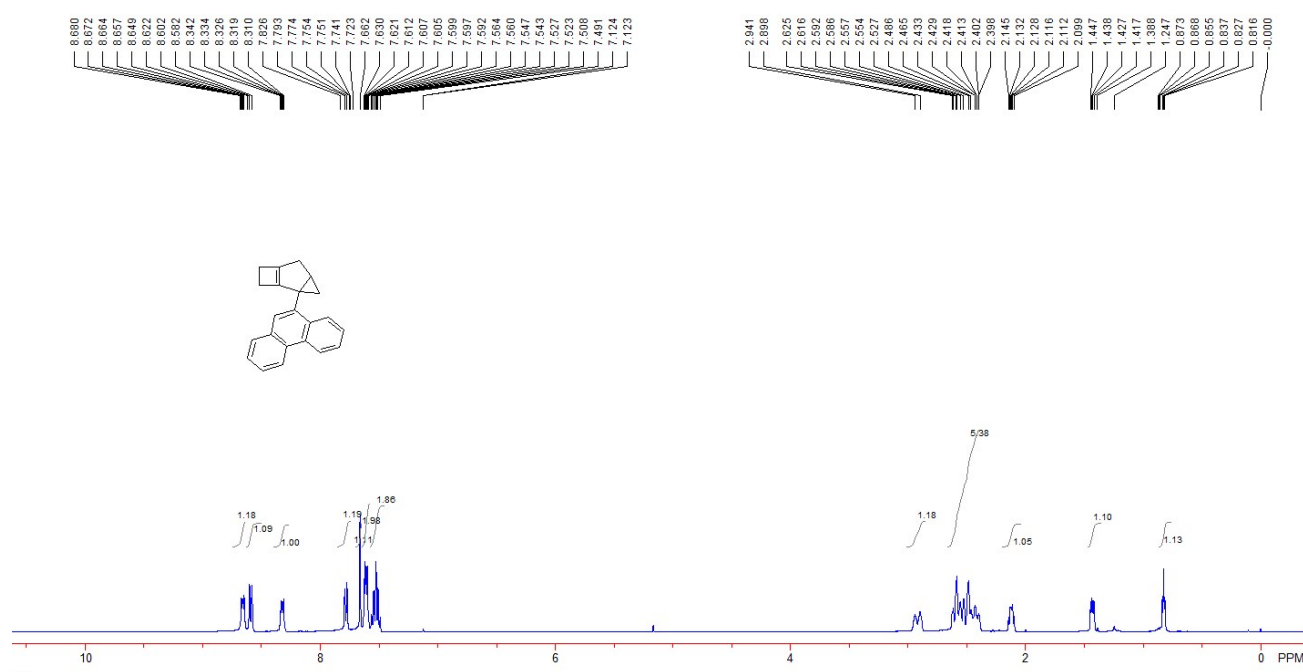

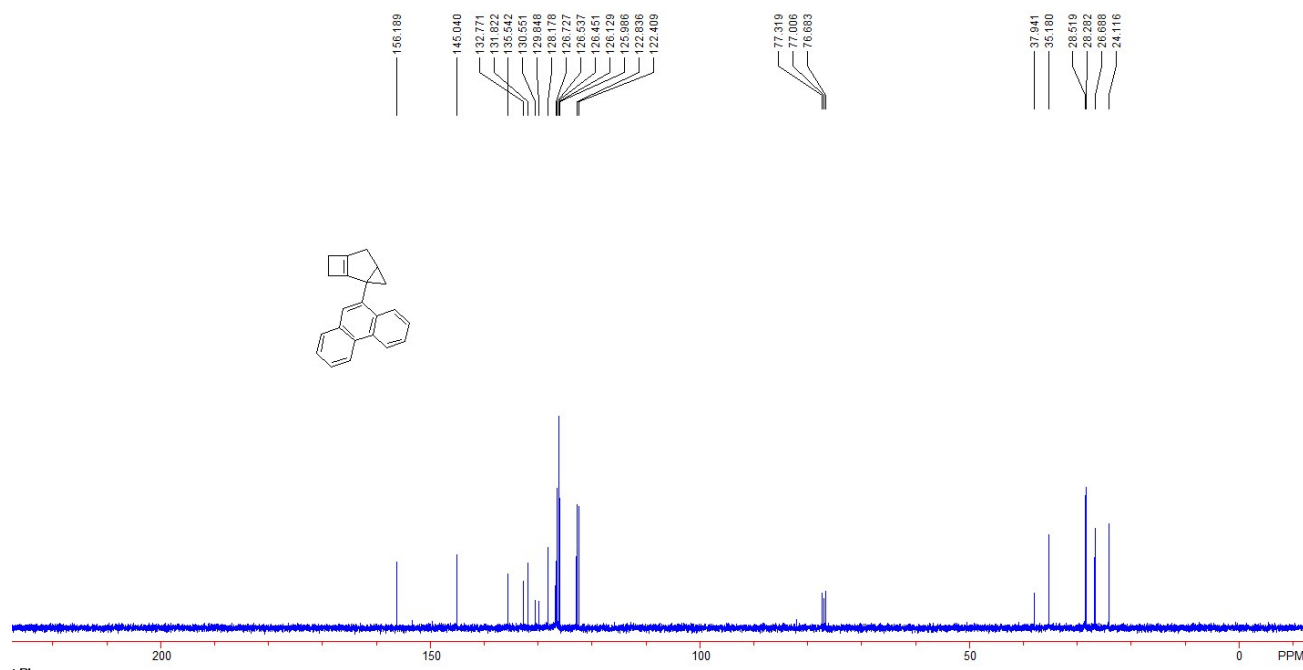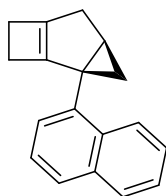

**2-(Naphthalen-1-yl)tricyclo[4.2.0.0<sup>2,4</sup>]oct-1(6)-ene 4b:**

20 mg, yield = 43%. Colorless oil. <sup>1</sup>H NMR (400 MHz, CDCl<sub>3</sub>, TMS): δ 0.78-0.80 (m, 1H, CH<sub>2</sub>), 1.39-1.42 (m, 1H, CH<sub>2</sub>), 2.03-2.07 (m, 1H, CH), 2.39-2.63 (m, 5H, CH<sub>2</sub>), 2.87-2.92 (m, 1H, CH<sub>2</sub>), 7.23-7.42 (m, 2H, Ar), 7.45-7.52 (m, 2H, Ar), 7.72 (d, *J* = 8.0 Hz, 1H, Ar), 7.83-7.85 (m, 1H, Ar), 8.22-8.24 (m, 1H, Ar). <sup>13</sup>C NMR (100 MHz, CDCl<sub>3</sub>, TMS): δ 23.9, 26.7, 28.3, 28.4, 35.2, 37.6, 125.35, 125.37, 125.5, 125.7, 126.2, 127.1, 128.3, 133.7, 133.8, 137.3, 144.8, 156.4. IR (CH<sub>2</sub>Cl<sub>2</sub>) ν 3044, 2917, 2836, 1707, 1594, 1402, 793, 776 cm<sup>-1</sup>. MS (%) *m/z* 232 (51.60), 215 (59.42), 204 (100.00), 189 (12.28), 141 (60.65), 128 (8.32), 117 (12.50), 101 (33.90), 95 (12.76). HRMS (EI) calcd. for C<sub>18</sub>H<sub>16</sub>: 232.1252, found: 232.1251.

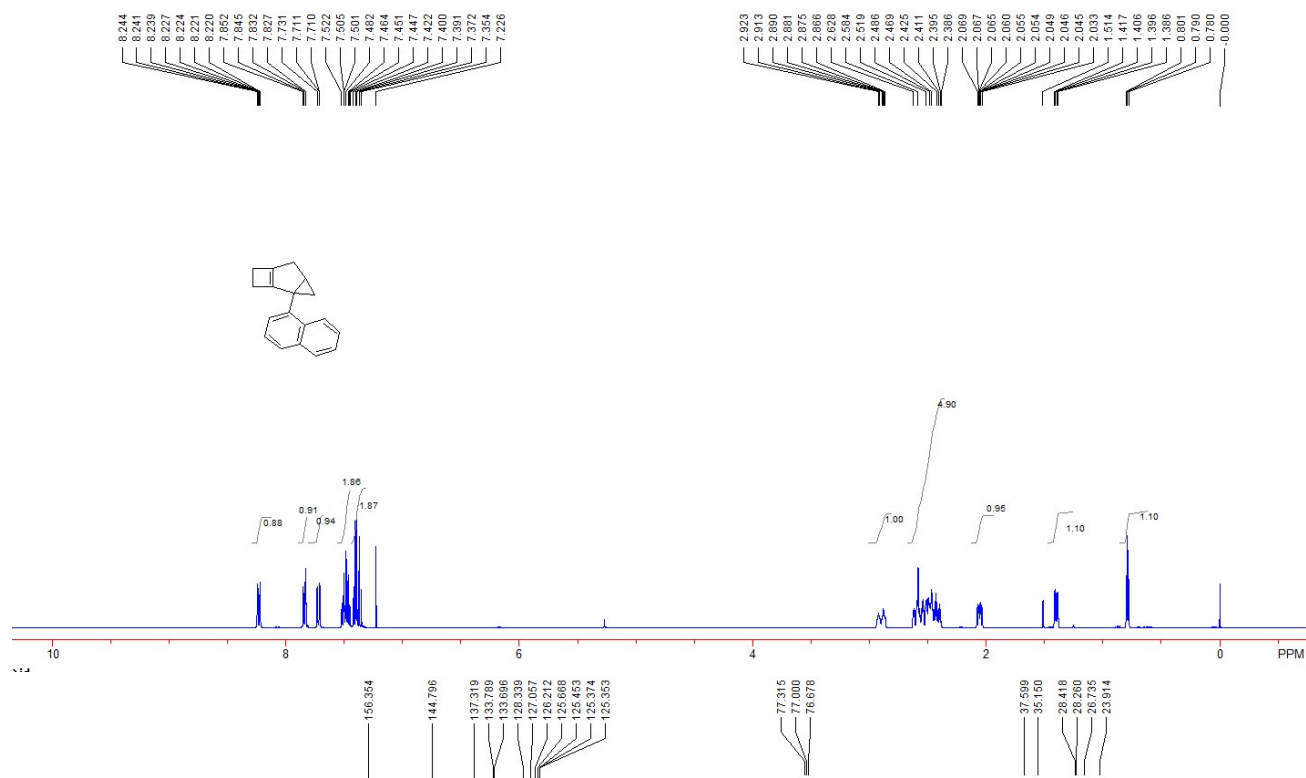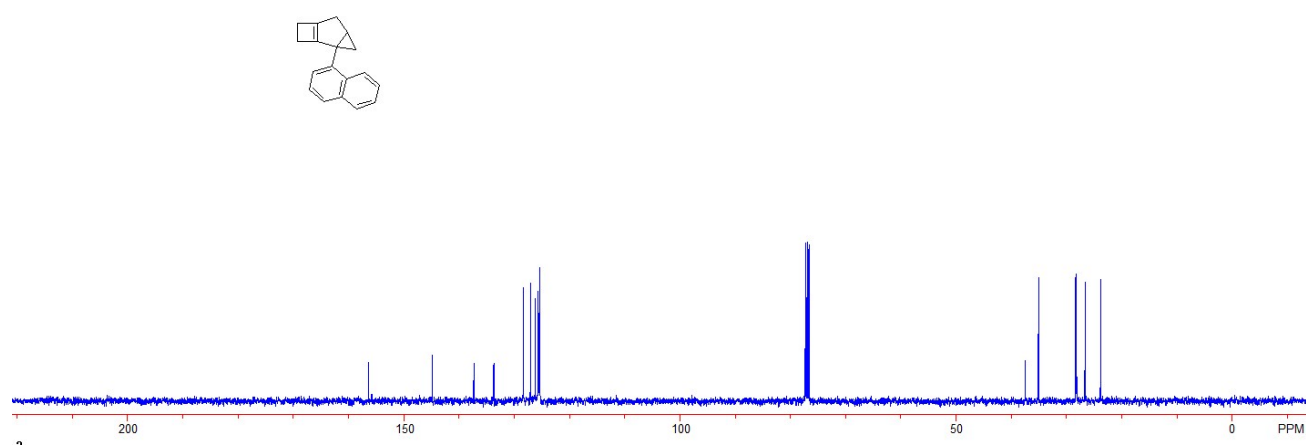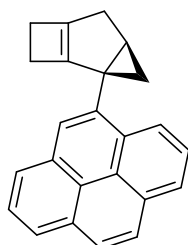

**4-(tricyclo[4.2.0.0<sup>2,4</sup>]oct-1(6)-en-2-yl)pyrene 4c:**

46 mg, 75%. White solid, mp: 91-93 °C. <sup>1</sup>H NMR (400 MHz, CDCl<sub>3</sub>, TMS): δ 0.92-0.95 (m, 1H, CH<sub>2</sub>), 1.54-1.57 (m, 1H, CH<sub>2</sub>), 2.17-2.22 (m, 1H, CH), 2.41-2.45 (m, 1H, CH<sub>2</sub>), 2.50-2.67 (m, 4H,

CH<sub>2</sub>), 2.97-3.01 (m, 1H, CH<sub>2</sub>), 7.93-7.98 (m, 4H, Ar), 8.05-8.15 (m, 4H, Ar), 8.48 (d, *J* = 9.2 Hz, 1H, Ar). <sup>13</sup>C NMR (100 MHz, CDCl<sub>3</sub>, TMS): δ 24.4, 27.5, 28.2, 28.4, 35.3, 38.1, 124.5, 124.74, 124.76, 124.85, 125.8, 126.8, 127.1, 127.2, 127.4, 130.2, 130.9, 131.0, 131.3, 135.0, 144.8, 156.6. IR (CH<sub>2</sub>Cl<sub>2</sub>) ν 3039, 2916, 2835, 1435, 1080, 845, 801, 718, 682 cm<sup>-1</sup>. MS (%) *m/z* 306 (M<sup>+</sup>, 100.00), 289 (56.23), 277 (61.14), 263 (25.25), 239 (33.43), 226 (13.19), 145 (33.92), 138 (32.92), 132 (13.46). HRMS (EI) calcd. for C<sub>24</sub>H<sub>18</sub>: 306.1409, found: 306.1406.

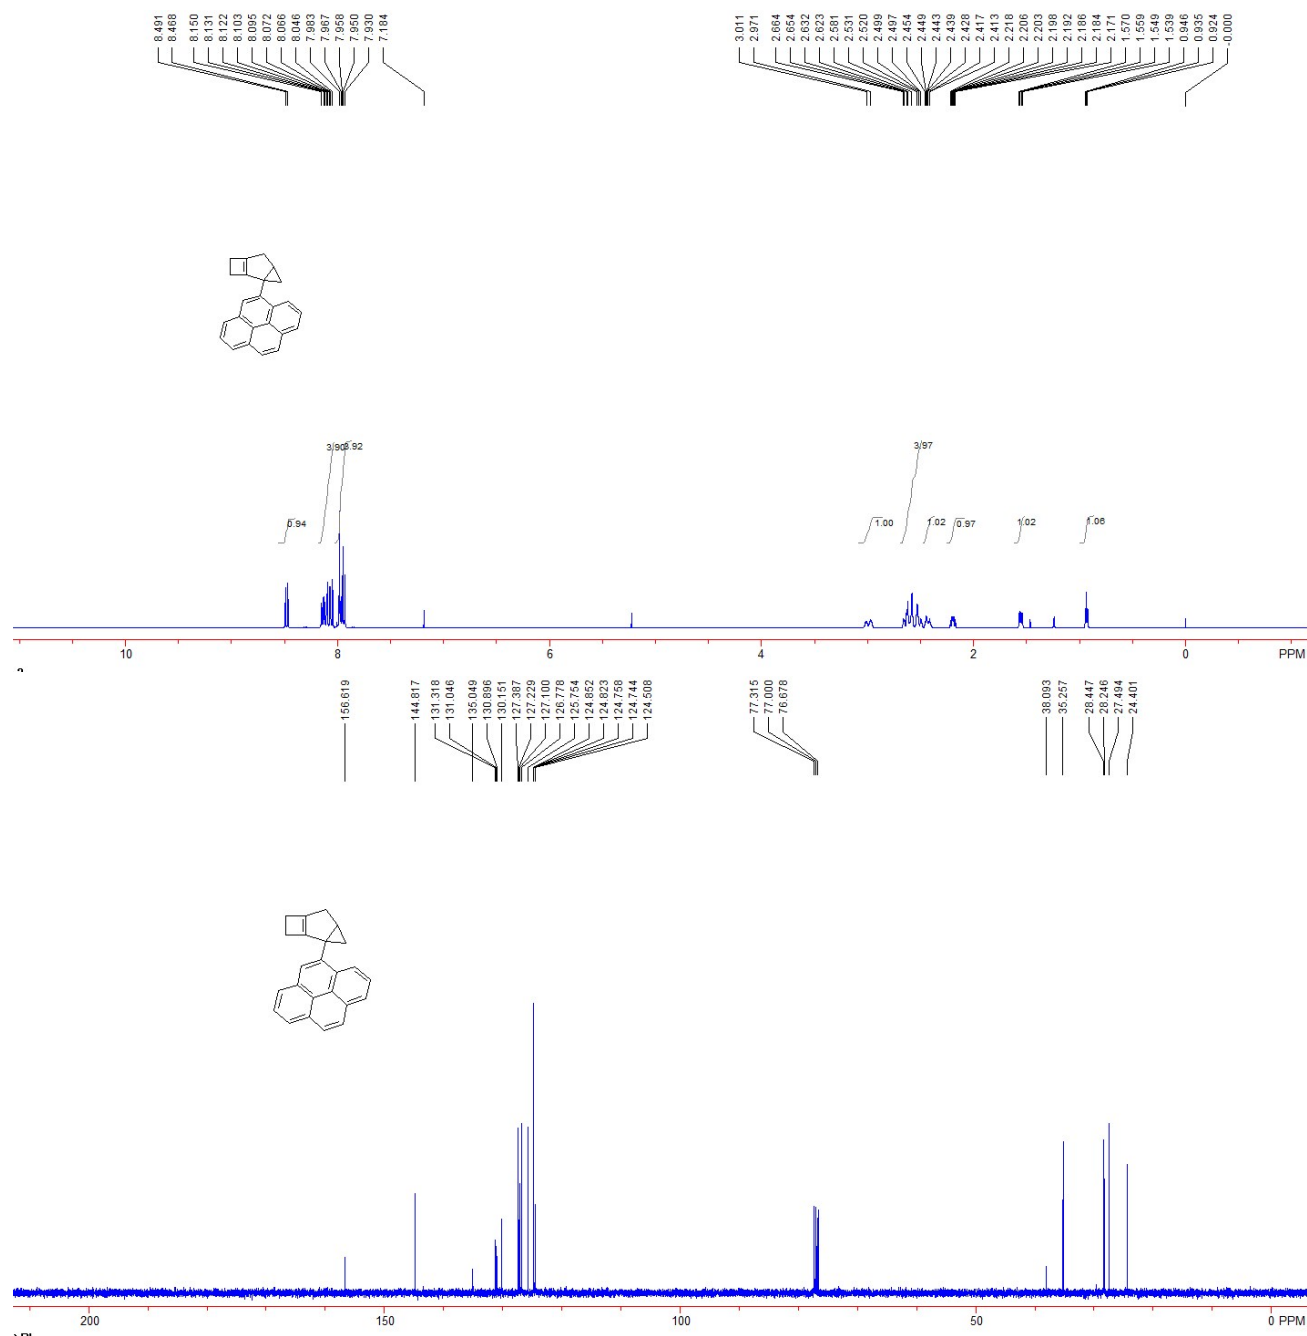

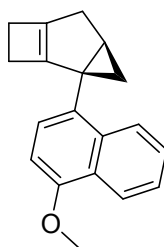

**2-(4-Methoxynaphthalen-1-yl)tricyclo[4.2.0.0<sup>2,4</sup>]oct-1(6)-ene 4d:**

32 mg, yield = 62%. Colorless oil. <sup>1</sup>H NMR (400 MHz, CDCl<sub>3</sub>, TMS): δ 0.74 (br, 1H, CH<sub>2</sub>), 1.34-1.37 (m, 1H, CH<sub>2</sub>), 1.96-2.00 (m, 1H, CH), 2.39-2.60 (m, 5H, CH<sub>2</sub>), 2.86-2.90 (m, 1H, CH<sub>2</sub>), 3.92 (s, 3H, CH<sub>3</sub>), 6.66 (d, *J* = 8.0 Hz, 1H, Ar), 7.28 (d, *J* = 8.0 Hz, 1H, Ar), 7.44-7.52 (m, 2H, Ar), 8.17 (d, *J* = 8.4 Hz, 1H, Ar), 8.27 (d, *J* = 8.4 Hz, 1H, Ar). <sup>13</sup>C NMR (100 MHz, CDCl<sub>3</sub>, TMS): δ 23.9, 26.6, 28.2, 28.4, 35.1, 37.1, 55.4, 103.1, 122.2, 124.8, 125.1, 125.7, 126.1, 126.2, 129.2, 134.5, 144.4, 154.5, 156.6. IR (CH<sub>2</sub>Cl<sub>2</sub>) ν 3071, 2916, 2835, 1585, 1463, 1234, 1083, 1026, 763 cm<sup>-1</sup>. MS (%) *m/z* 262 (M<sup>+</sup>, 93.59), 247 (39.29), 231 (100.00), 215 (37.92), 202 (31.67), 189 (19.55), 178 (13.94), 116 (12.57), 101 (15.52). HRMS (EI) calcd. for C<sub>19</sub>H<sub>18</sub>O: 262.1358, found: 262.1352.

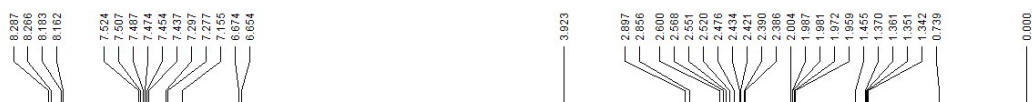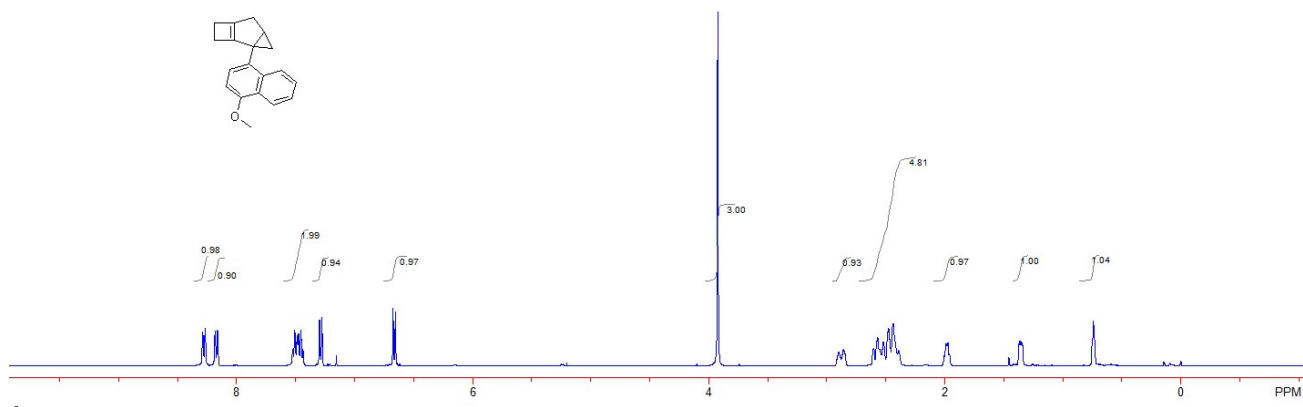

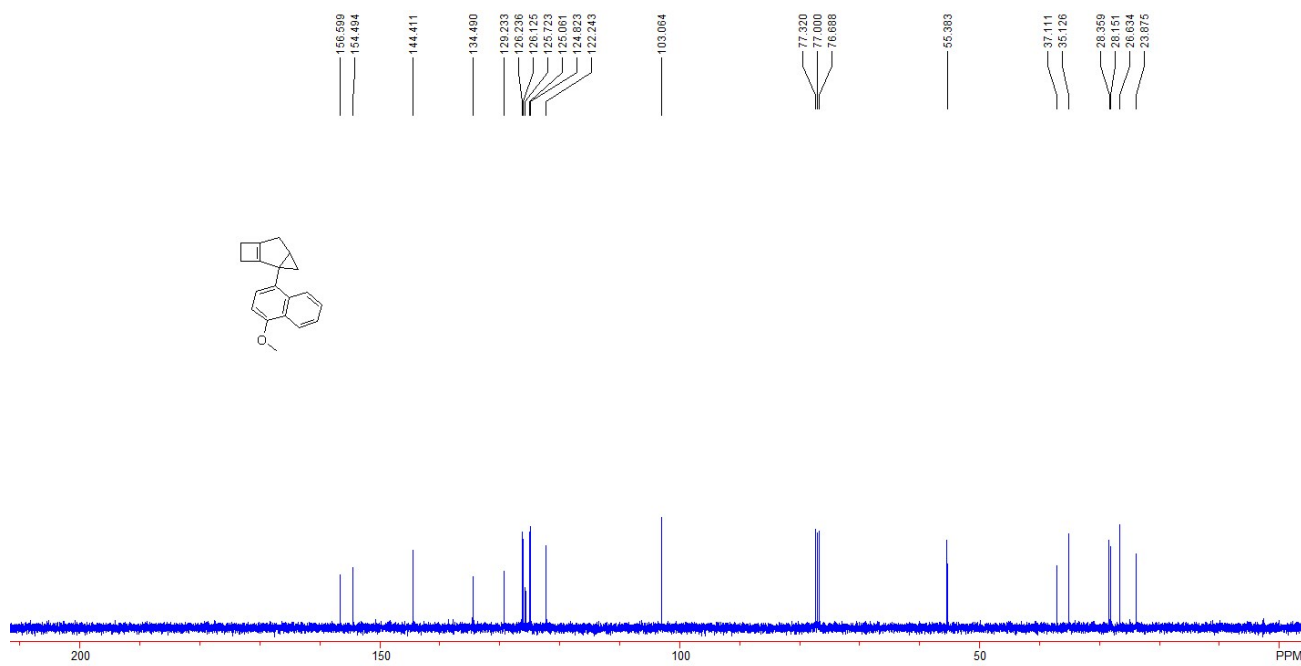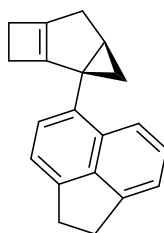

**5-(tricyclo[4.2.0.0<sup>2,4</sup>]oct-1(6)-en-2-yl)-1,2-dihydroacenaphthylene 4e:**

27 mg, yield = 52%. Colorless oil. <sup>1</sup>H NMR (400 MHz, CDCl<sub>3</sub>, TMS): δ 0.71-0.74 (m, 1H, CH<sub>2</sub>), 1.42-1.45 (m, 1H, CH<sub>2</sub>), 1.94-1.99 (m, 1H, CH), 2.43-2.49 (m, 3H, CH<sub>2</sub>), 2.53-2.63 (m, 2H, CH<sub>2</sub>), 2.86-2.91 (m, 1H, CH<sub>2</sub>), 3.32-3.28 (m, 4H, CH<sub>2</sub>), 7.16 (d, *J* = 7.2 Hz, 1H, Ar), 7.26 (d, *J* = 6.8 Hz, 1H, Ar), 7.36 (d, *J* = 6.8 Hz, 1H, Ar), 7.44 (dd, *J*<sub>1</sub> = 8.0 Hz, *J*<sub>2</sub> = 7.6 Hz, 1H, Ar), 7.82 (d, *J* = 8.0 Hz, 1H, Ar). <sup>13</sup>C NMR (100 MHz, CDCl<sub>3</sub>, TMS): δ 23.3, 26.9, 28.3, 28.4, 29.9, 30.6, 35.2, 36.9, 118.8, 119.1, 120.6, 127.47, 127.49, 132.1, 133.0, 139.5, 144.72, 144.73, 146.1, 156.3. IR (CH<sub>2</sub>Cl<sub>2</sub>) ν 3030, 2915, 2836, 1608, 1424, 1075, 907, 838, 770, 729 cm<sup>-1</sup>. MS (%) *m/z* 258 (M<sup>+</sup>, 87.95), 257 (100.00), 243 (47.74), 229 (75.40), 215 (28.04), 202 (21.62), 189 (20.93), 152 (15.00), 120 (13.80), 101 (12.10). HRMS (EI) calcd. for C<sub>20</sub>H<sub>18</sub>: 258.1409, found: 258.1404.

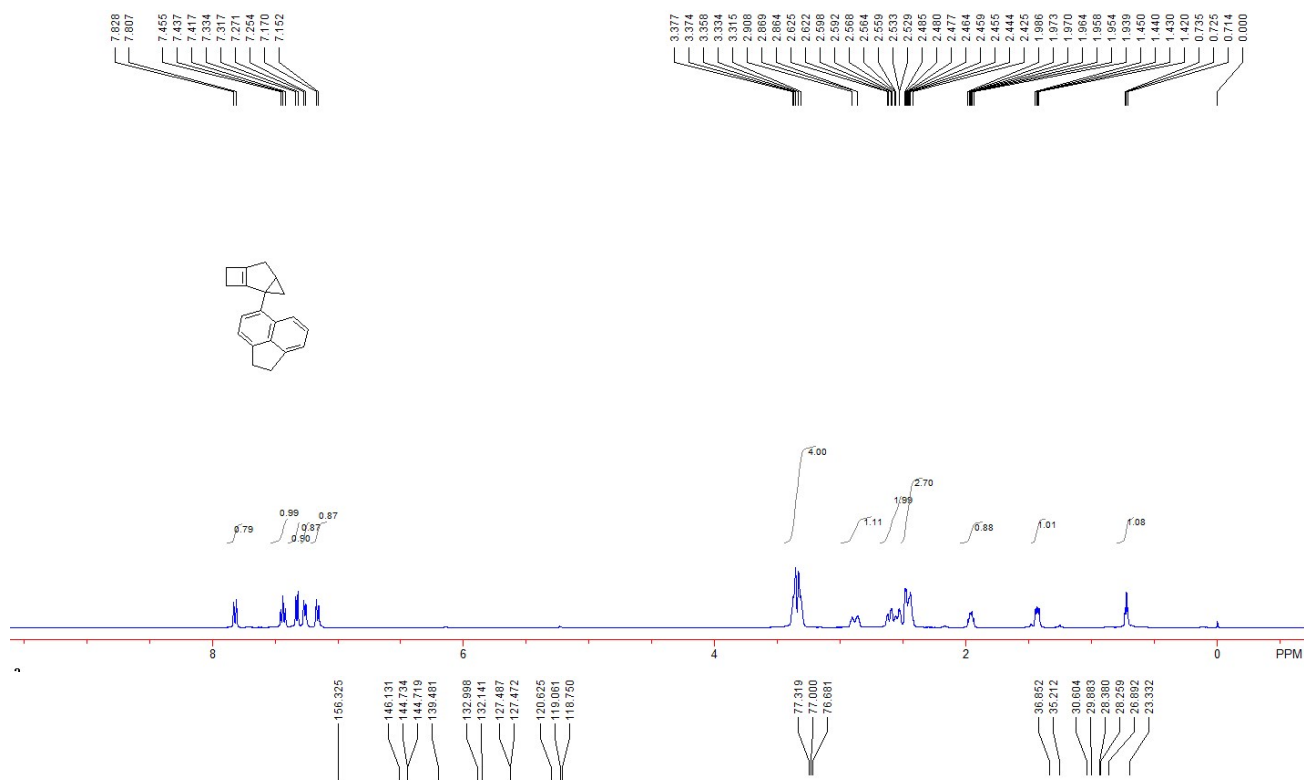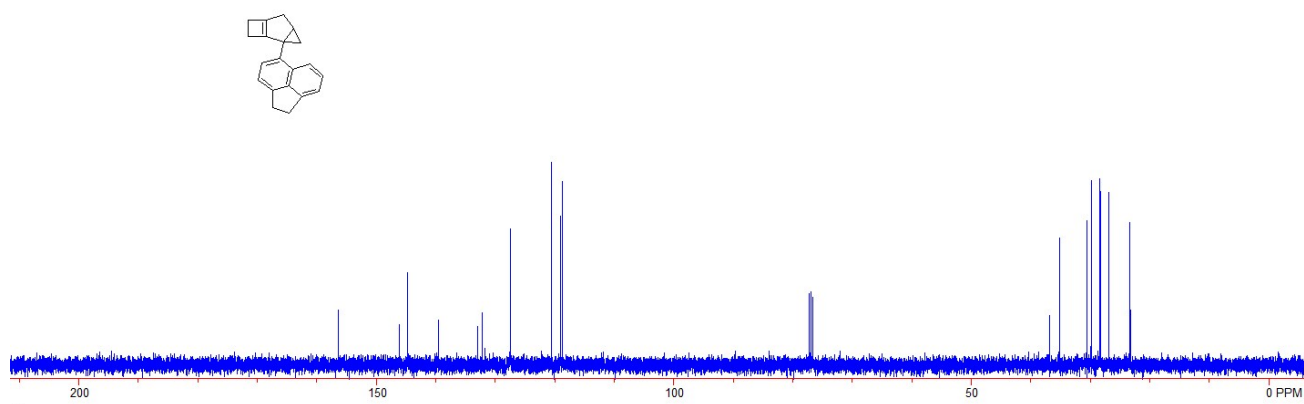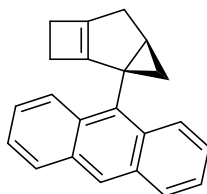

**9-(tricyclo[4.2.0.0<sup>2,4</sup>]oct-1(6)-en-2-yl)anthracene 4f:**

30 mg, yield = 52%. Colorless oil. <sup>1</sup>H NMR (400 MHz, CDCl<sub>3</sub>, TMS): δ 1.16-1.18 (m, 1H, CH<sub>2</sub>), 1.36-1.39 (m, 1H, CH<sub>2</sub>), 2.13-2.18 (m, 1H, CH), 2.38-2.42 (m, 1H, CH<sub>2</sub>), 2.51-2.65 (m, 4H, CH<sub>2</sub>), 3.07-3.12 (m, 1H, CH<sub>2</sub>), 7.41-7.51 (m, 4H, Ar), 7.97 (d, *J* = 8.0 Hz, 2H, Ar), 8.27 (d, *J* = 8.8 Hz, 1H,

Ar), 8.34 (s, 1H, Ar), 8.70 (d,  $J = 8.8$  Hz, 1H, Ar).  $^{13}\text{C}$  NMR (100 MHz,  $\text{CDCl}_3$ , TMS):  $\delta$  26.6, 28.1, 28.4, 29.2, 34.1, 34.9, 124.8, 125.16, 125.22, 125.7, 126.0, 126.4, 128.8, 131.5, 131.6, 131.9, 132.9, 144.6, 156.9. IR ( $\text{CH}_2\text{Cl}_2$ )  $\nu$  3050, 2917, 2835, 1673, 1441, 1285, 885, 733, 700  $\text{cm}^{-1}$ . MS (%)  $m/z$  282 ( $\text{M}^+$ , 100.00), 267 (34.25), 253 (47.29), 239 (51.17), 215 (24.50), 202 (13.87), 126 (25.52), 120 (13.53), 113 (11.94). HRMS (EI) calcd. for  $\text{C}_{22}\text{H}_{18}$ : 282.1409, found: 282.1400.

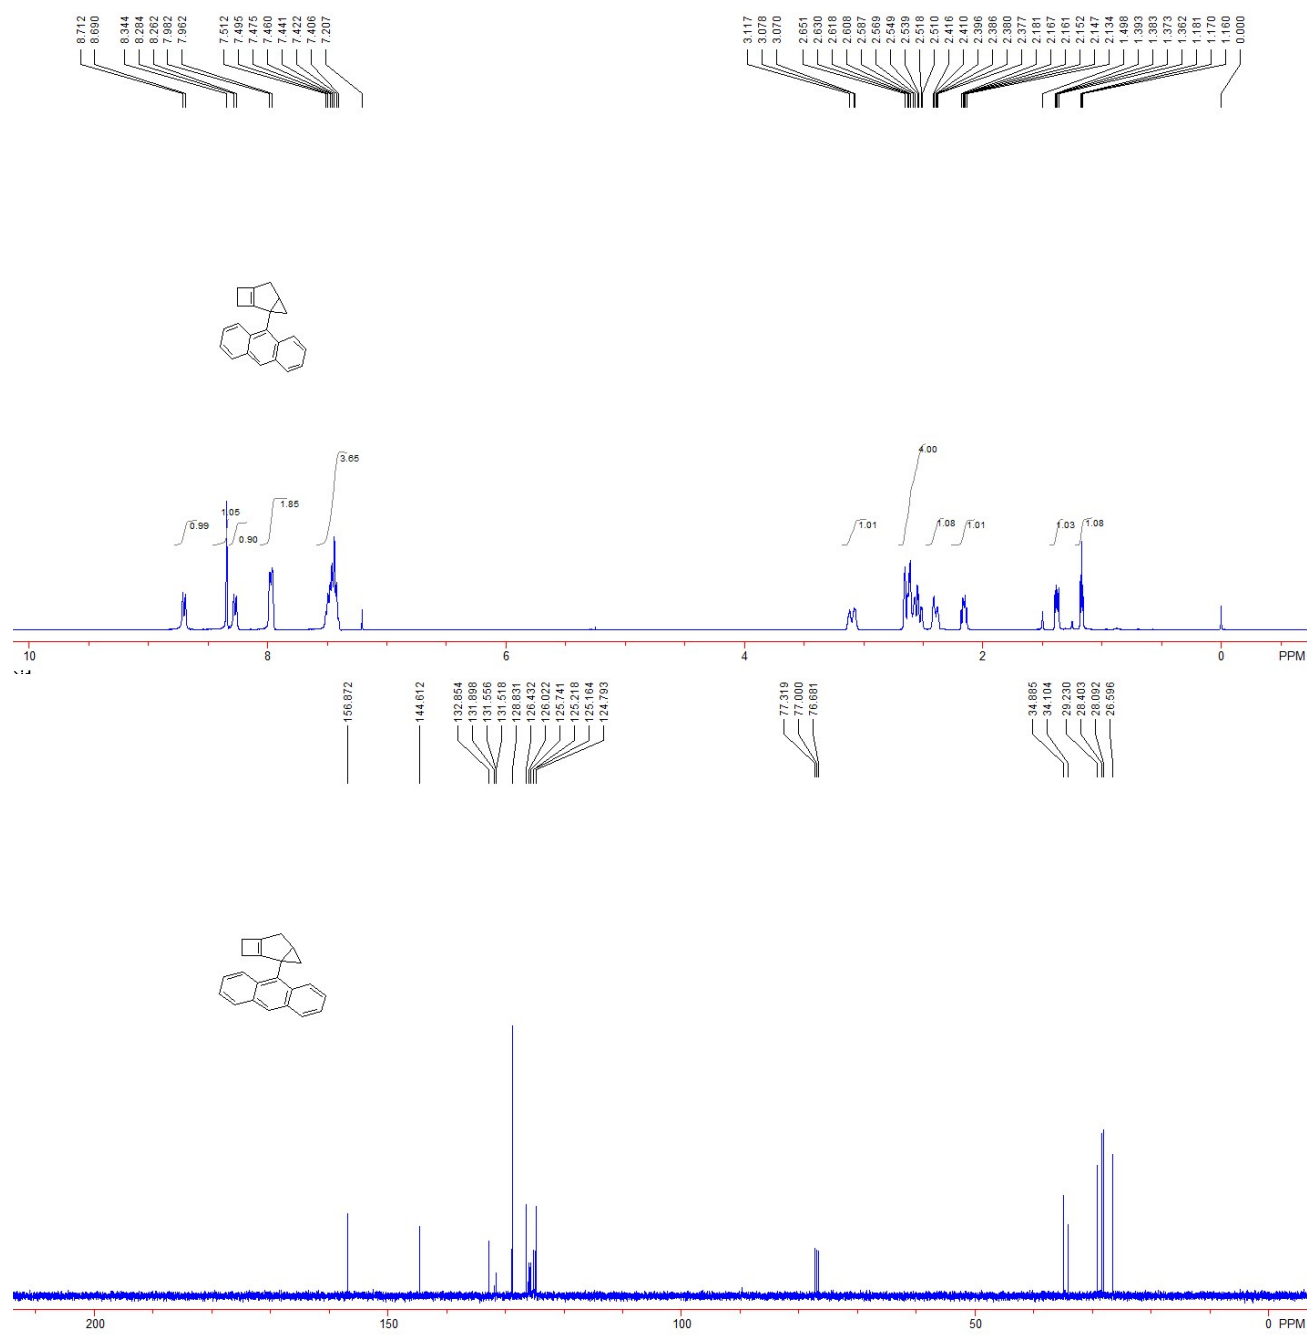

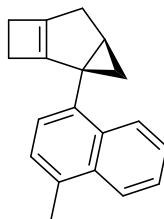

**2-(4-Methylnaphthalen-1-yl)tricyclo[4.2.0.0.2,4]oct-1(6)-ene 4g:**

30 mg, yield = 60%. Colorless oil.  $^1\text{H}$  NMR (400 MHz,  $\text{CDCl}_3$ , TMS):  $\delta$  0.76-0.78 (m, 1H,  $\text{CH}_2$ ), 1.36-1.39 (m, 1H,  $\text{CH}_2$ ), 2.01-2.06 (m, 1H, CH), 2.38-2.73 (m, 5H,  $\text{CH}_2$ ), 2.69 (s, 3H,  $\text{CH}_3$ ), 7.22 (d,  $J = 7.6$  Hz, 1H, Ar), 7.31 (d,  $J = 7.2$  Hz, 1H, Ar), 7.31-7.53 (m, 2H, Ar), 7.99-8.01 (m, 1H, Ar), 8.25-8.28 (m, 1H, Ar).  $^{13}\text{C}$  NMR (100 MHz,  $\text{CDCl}_3$ , TMS):  $\delta$  19.4, 24.0, 26.7, 28.2, 28.4, 35.2, 37.5, 124.5, 125.3, 125.4, 125.9, 126.0, 126.1, 132.8, 133.1, 133.8, 135.1, 144.6, 156.5. IR ( $\text{CH}_2\text{Cl}_2$ )  $\nu$  3062, 2918, 2837, 1705, 1440, 1024, 906, 832, 757, 728  $\text{cm}^{-1}$ . MS (%)  $m/z$  246 ( $\text{M}^+$ , 28.21), 231 (100.00), 215 (38.02), 189 (11.84), 178 (8.78), 152 (7.67), 108 (14.43), 95 (1.02). HRMS (EI) calcd. for  $\text{C}_{19}\text{H}_{18}$ : 246.1409, found: 246.1405.

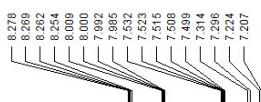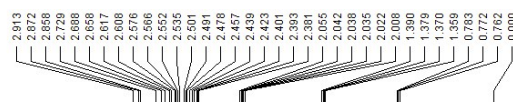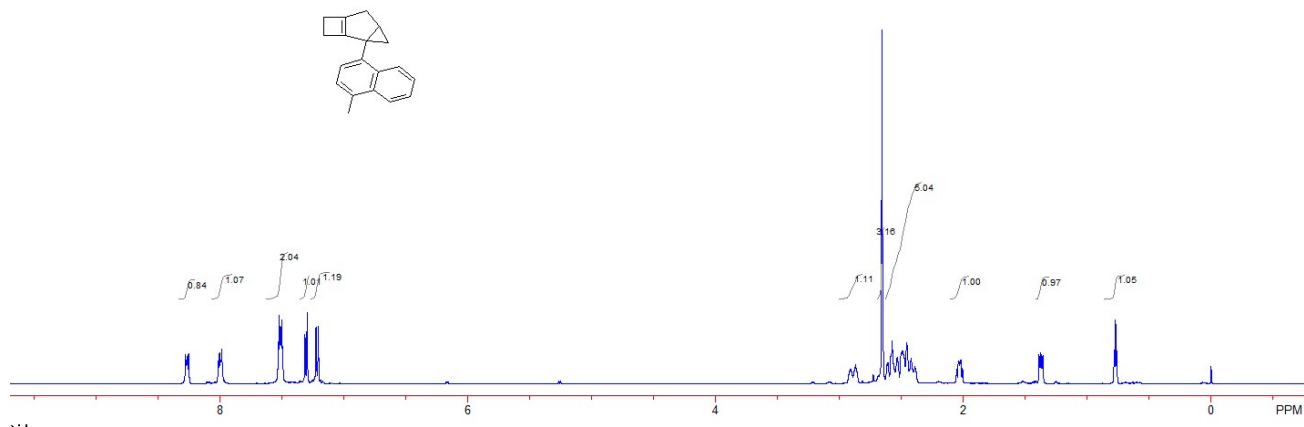

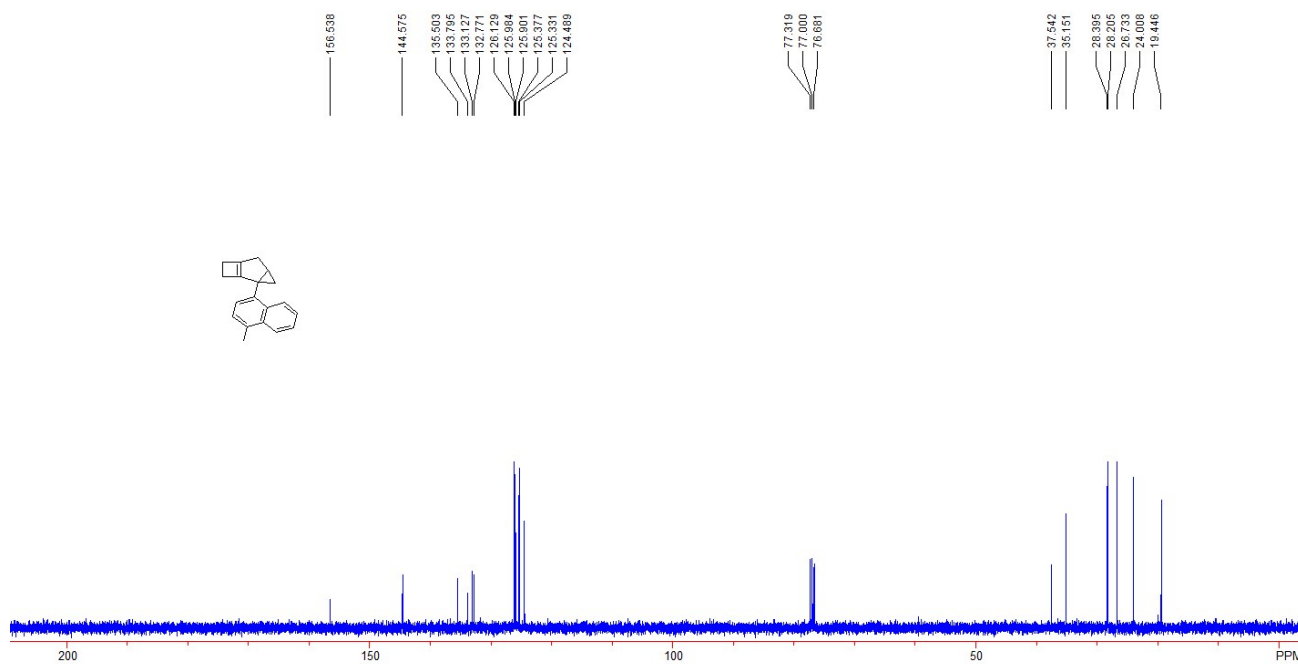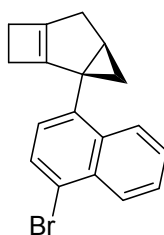

**2-(4-Bromonaphthalen-1-yl)tricyclo[4.2.0.0.2,4]oct-1(6)-ene 4h:**

36 mg, yield = 58%. Colorless oil.  $^1\text{H}$  NMR (400 MHz,  $\text{CDCl}_3$ , TMS):  $\delta$  0.79-0.81 (m, 1H,  $\text{CH}_2$ ), 1.36-1.39 (m, 1H,  $\text{CH}_2$ ), 2.03-2.07 (m, 1H, CH), 2.37-2.42 (m, 1H,  $\text{CH}_2$ ), 2.46-2.63 (m, 4H,  $\text{CH}_2$ ), 2.86-2.91 (m, 1H,  $\text{CH}_2$ ), 7.27 (dd,  $J_1 = 8.8$  Hz,  $J_2 = 8.0$  Hz, 1H, Ar), 7.53-7.61 (m, 2H, Ar), 7.68 (d,  $J = 7.6$  Hz, 1H, Ar), 8.24-8.27 (m, 2H, Ar).  $^{13}\text{C}$  NMR (100 MHz,  $\text{CDCl}_3$ , TMS):  $\delta$  24.0, 26.9, 28.2, 28.4, 35.1, 37.4, 121.6, 125.8, 126.5, 126.8, 126.9, 127.6, 129.4, 131.9, 135.0, 145.1, 155.9. IR ( $\text{CH}_2\text{Cl}_2$ )  $\nu$  3066, 2920, 2831, 1706, 1505, 1380, 907, 759, 730  $\text{cm}^{-1}$ . MS (%)  $m/z$  310 ( $\text{M}^+$ , 17.75), 231 (100.00), 215 (81.54), 202 (46.42), 189 (24.63), 178 (9.55), 163 (14.85), 152 (10.37), 108 (23.78), 95 (12.18). HRMS (EI) calcd. for  $\text{C}_{18}\text{H}_{15}\text{Br}$ : 310.0357, found: 310.0356.

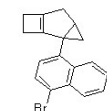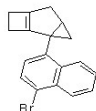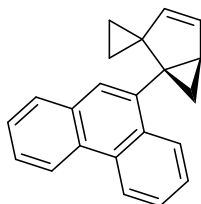

2H, CH<sub>2</sub>), 0.85-0.87 (m, 1H, CH<sub>2</sub>), 1.53-1.55 (m, 1H, CH<sub>2</sub>), 2.23-2.26 (m, 1H, CH), 5.29 (d,  $J = 5.6$  Hz, 1H, =CH), 6.19 (dd,  $J_1 = 5.6$  Hz,  $J_2 = 2.0$  Hz, 1H, =CH), 7.18-7.59 (m, 2H, Ar), 7.61-7.64 (m, 3H, Ar), 7.80-7.82 (m, 1H, Ar), 8.16-8.18 (m, 1H, Ar), 8.62 (d,  $J = 8.0$  Hz, 2H, Ar), 8.65-8.68 (m, 1H, Ar). <sup>13</sup>C NMR (100 MHz, CDCl<sub>3</sub>, TMS):  $\delta$  10.6, 14.2, 23.8, 32.6, 35.96, 35.98, 122.5, 122.7, 126.1, 136.3, 126.4, 126.5, 127.2, 128.3, 128.5, 130.1, 130.4, 131.6, 131.8, 132.7, 135.9, 136.8. IR (CH<sub>2</sub>Cl<sub>2</sub>)  $\nu$  3058, 2992, 2927, 1449, 1264, 1045, 895, 763, 726 cm<sup>-1</sup>. MS (%)  $m/z$  282 (27.59), 267 (29.68), 254 (100.00), 239 (12.58), 191 (73.03), 178 (7.43), 165 (10.31), 126 (32.74), 120 (12.18). HRMS (EI) calcd. for C<sub>22</sub>H<sub>18</sub>: 282.1409, found: 282.1407.

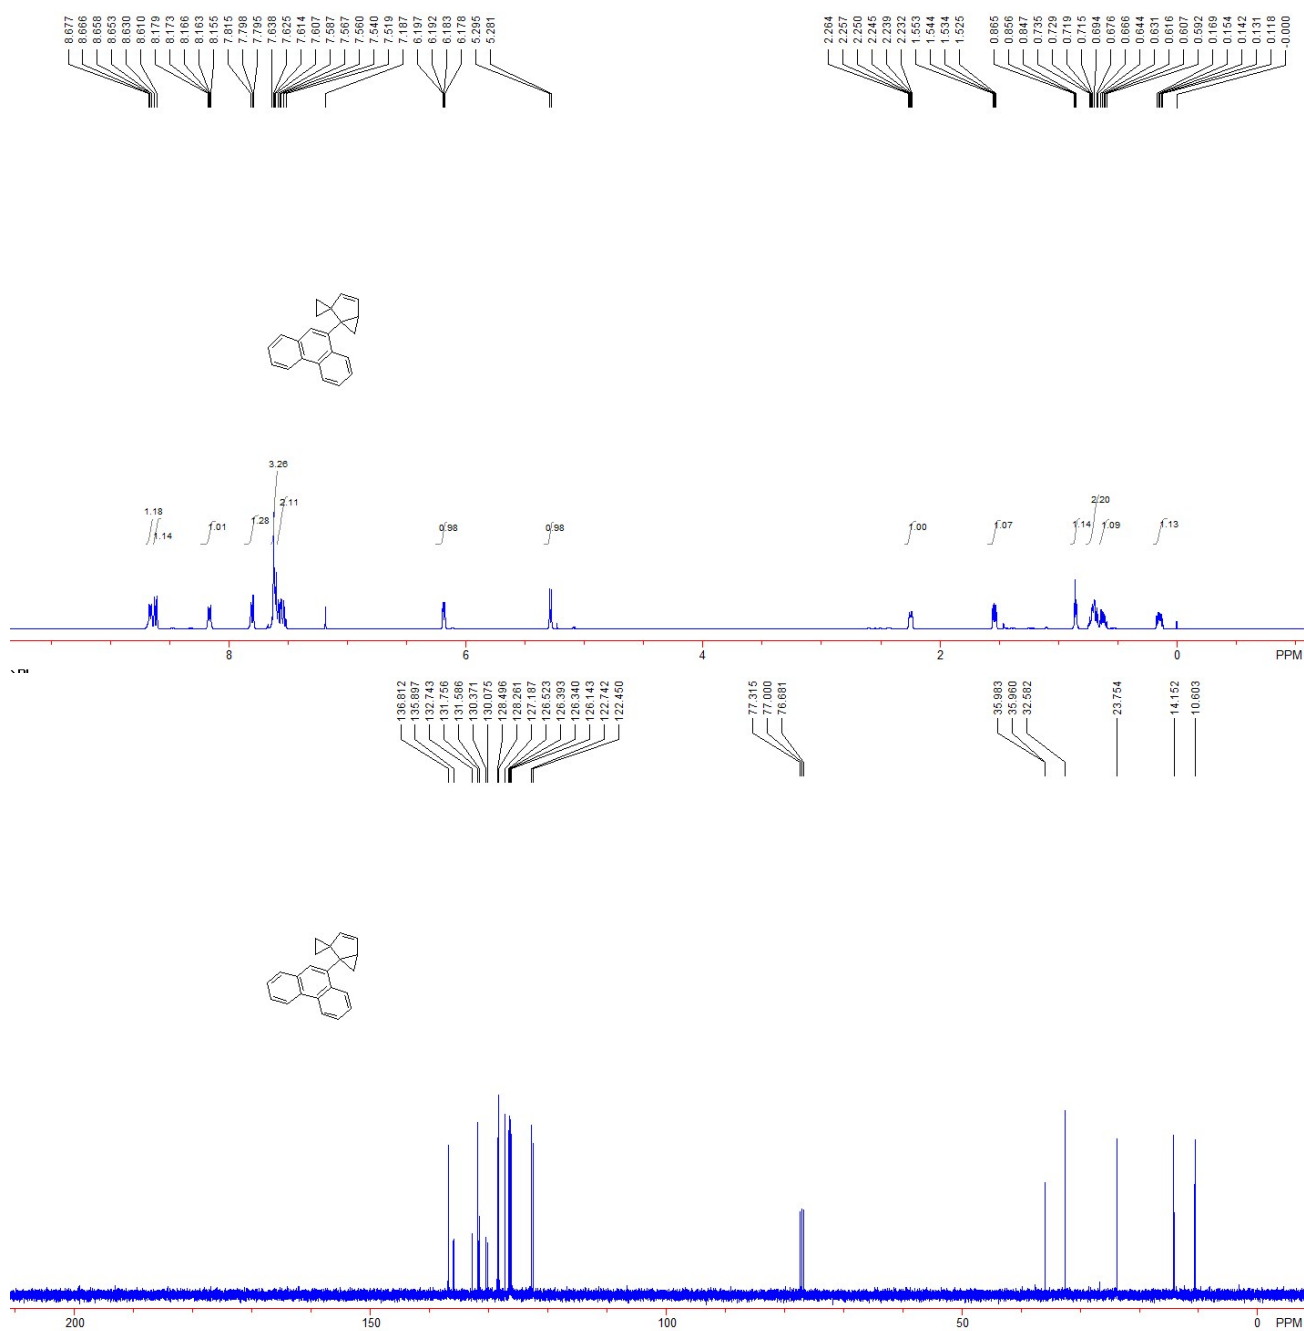



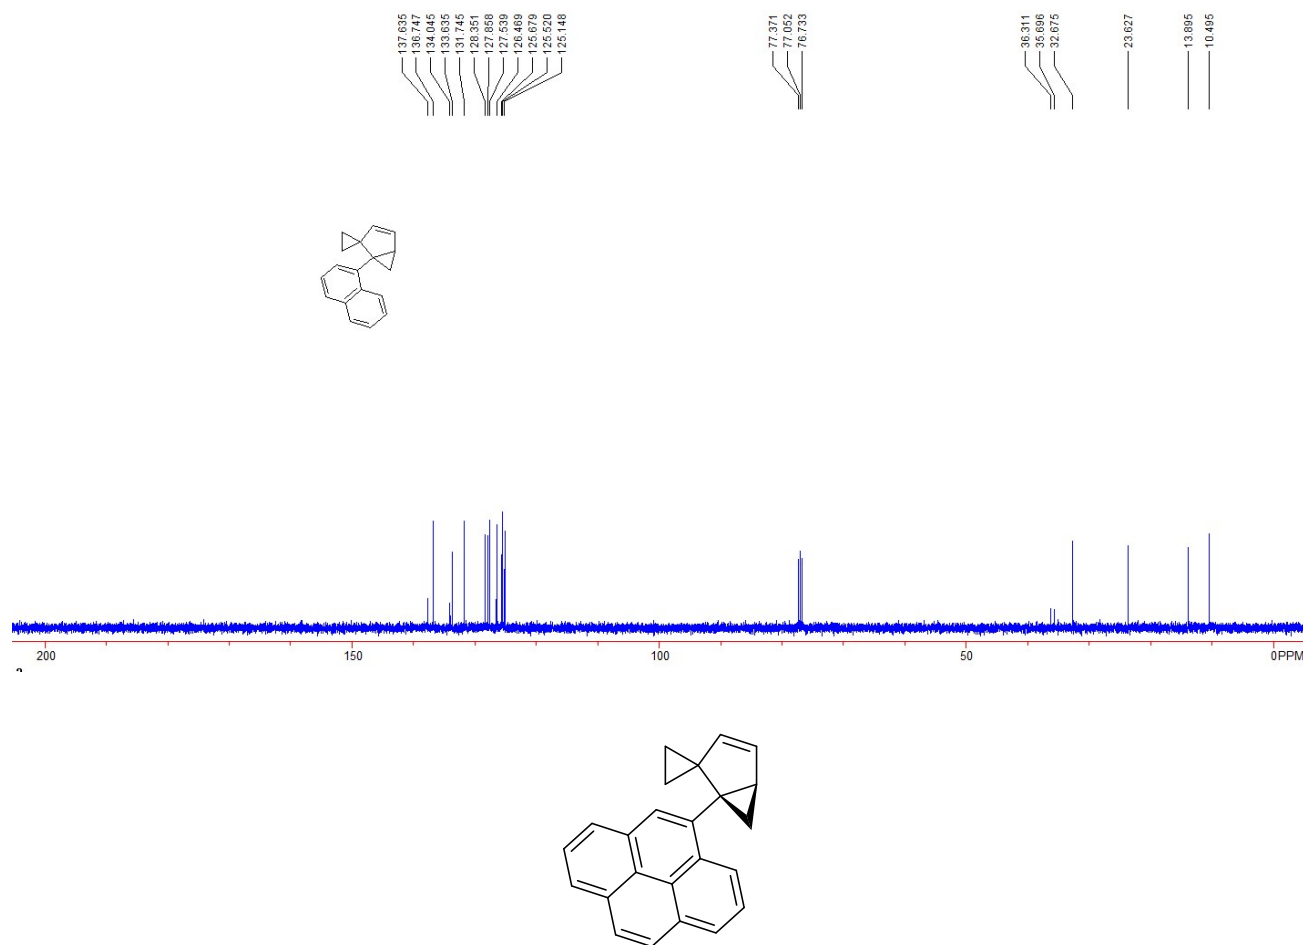

**4-(spiro[bicyclo[3.1.0]hexane-2,1'-cyclopropan]-3-en-1-yl)pyrene 5c:**

49 mg, yield = 80%. A white solid, mp: 81-82 °C (Mixtures of two diastereomers, dr = 7.1/1).  $^1\text{H}$  NMR (400 MHz,  $\text{CDCl}_3$ , TMS):  $\delta$  0.15-0.20 (m, 1H,  $\text{CH}_2$ ), 0.73-0.79 (m, 1H,  $\text{CH}_2$ ), 0.83-0.88 (m, 2H,  $\text{CH}_2$ ), 0.91-1.07 (m, 1H,  $\text{CH}_2$ ), 1.72-1.75 (m, 1H,  $\text{CH}_2$ ), 2.48-2.50 (m, 1H, CH), 5.46 (d,  $J$  = 5.6 Hz, 1H, =CH), 6.38 (dd,  $J$  = 5.6 Hz, 1H, =CH), 7.98 (d,  $J$  = 5.6 Hz, 1H, Ar), 8.06-8.15 (m, 4H, Ar), 8.17-8.29 (m, 3H, Ar), 8.45 (d,  $J$  = 9.2 Hz, 1H, Ar).  $^{13}\text{C}$  NMR (100 MHz,  $\text{CDCl}_3$ , TMS):  $\delta$  10.5, 13.9, 23.8, 33.7, 36.2, 37.1, 124.4, 124.85, 124.88, 124.9, 125.2, 125.9, 127.1, 127.2, 127.4, 128.5, 130.5, 131.0, 131.3, 131.8, 131.9, 135.3, 136.9. IR ( $\text{CH}_2\text{Cl}_2$ )  $\nu$  3041, 1585, 1180, 971, 845, 757, 722, 683  $\text{cm}^{-1}$ . MS (%)  $m/z$  306 ( $\text{M}^+$ , 100.00), 289 (65.13), 273 (84.18), 239 (12.36), 215 (80.68), 145 (12.23), 138 (41.10), 117 (13.79), 91 (4.68). HRMS (EI) calcd. for  $\text{C}_{24}\text{H}_{18}$ : 306.1409, found: 306.1403.

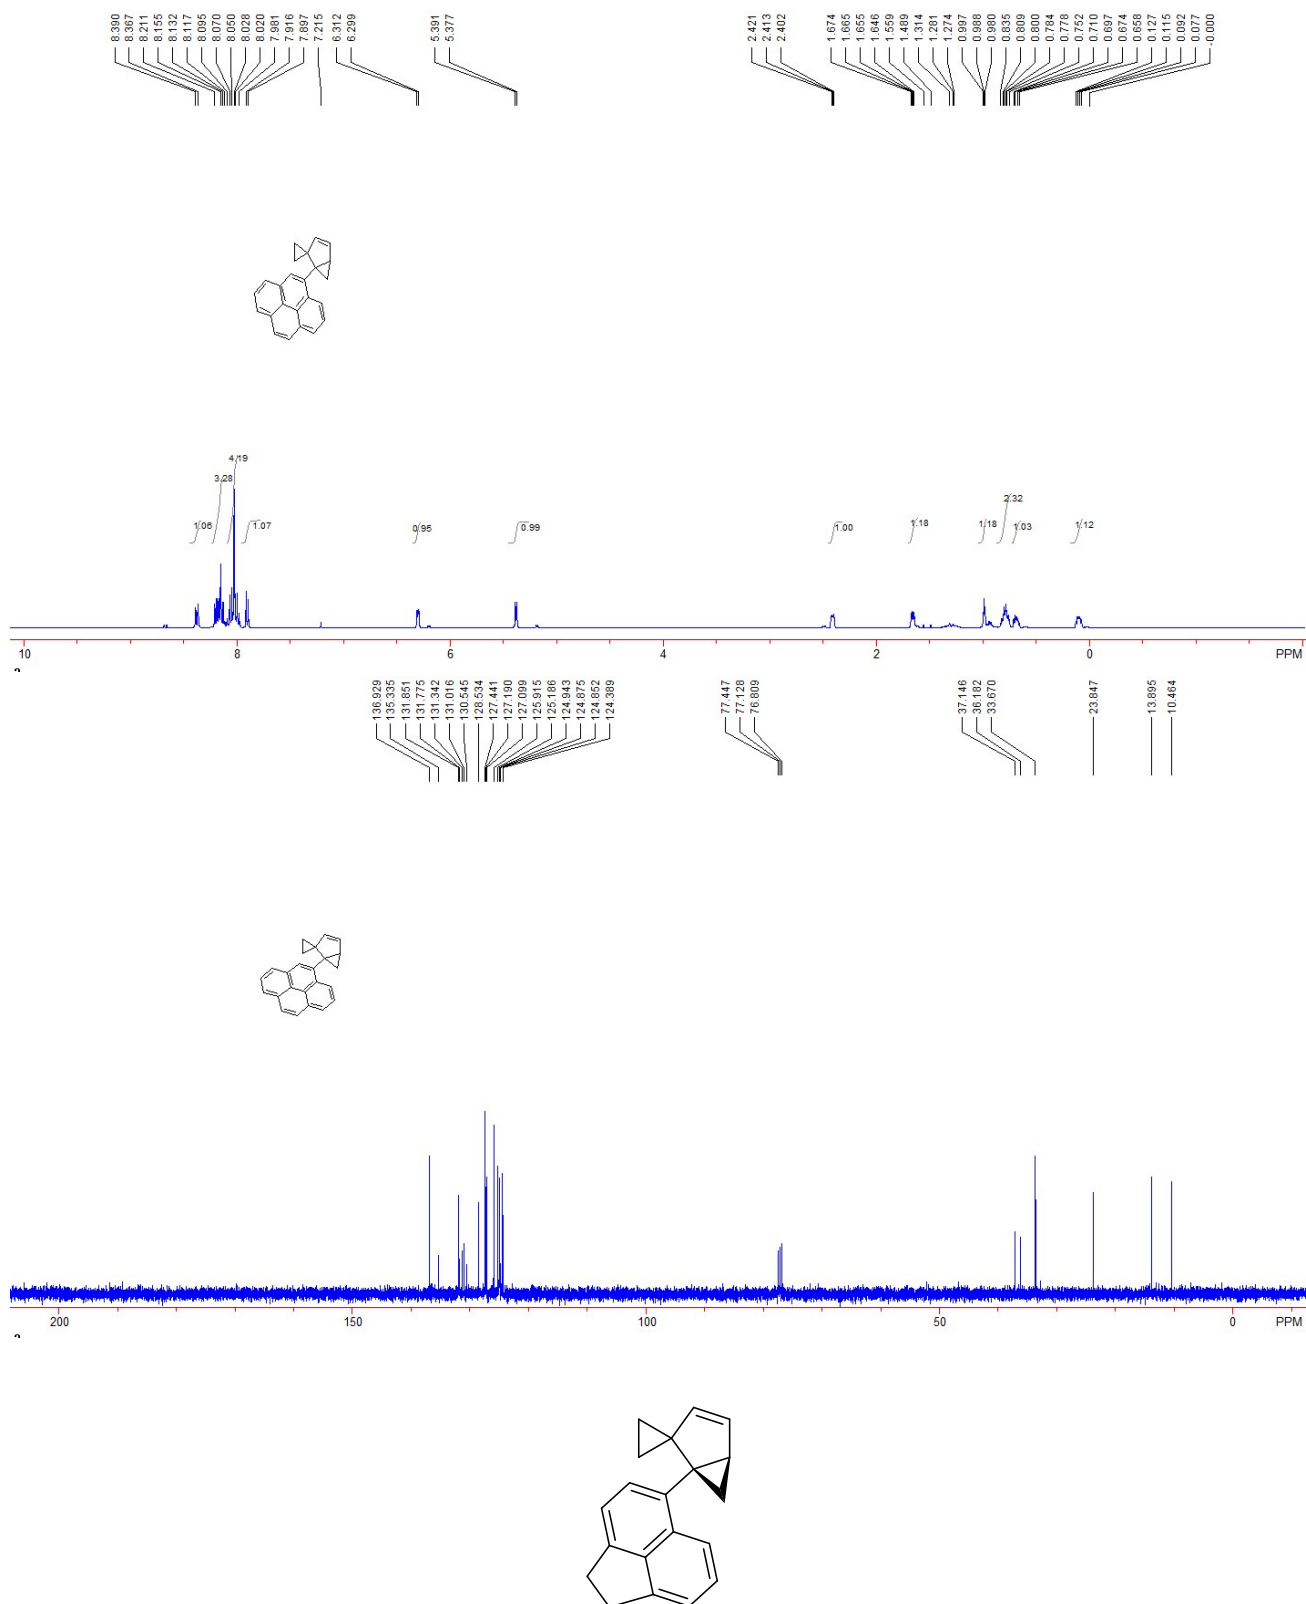

**5-(Spiro[bicyclo[3.1.0]hexane-2,1'-cyclopropan]-3-en-1-yl)-1,2-dihydroacenaphthylene **5e**:**

36 mg, yield = 70%. A white solid, mp: 79-81 °C. <sup>1</sup>H NMR (400 MHz, CDCl<sub>3</sub>, TMS): δ 0.11-0.12 (m, 1H, CH<sub>2</sub>), 0.58-0.59 (m, 1H, CH<sub>2</sub>), 0.60-0.75 (m, 3H, CH<sub>2</sub>), 1.43-1.52 (m, 1H, CH<sub>2</sub>), 2.17 (b, 1H, CH), 3.32-3.37 (m, 4H, CH<sub>2</sub>), 5.24 (br, 1H, =CH), 6.14 (br, 1H, =CH), 7.15 (d, J = 6.4 Hz, 1H, Ar),

7.23-7.27 (m, 2H, Ar), 7.44 (dd,  $J_1 = 5.6$  Hz,  $J_2 = 2.0$  Hz, 1H, =CH), 7.70-7.71 (m, 1H, Ar).  $^{13}\text{C}$  NMR (100 MHz,  $\text{CDCl}_3$ , TMS):  $\delta$  10.3, 13.6, 23.4, 29.9, 30.6, 32.1, 34.8, 35.9, 118.6, 119.0, 121.6, 127.4, 129.1, 131.7, 132.3, 133.2, 136.5, 139.3, 145.2, 146.1. IR ( $\text{CH}_2\text{Cl}_2$ )  $\nu$  3059, 1588, 1444, 879, 837, 772, 755, 725  $\text{cm}^{-1}$ . MS (%)  $m/z$  258 ( $\text{M}^+$ , 76.36), 243 (39.55), 230 (100.00), 215 (27.90), 202 (20.48), 167 (54.36), 152 (29.74), 113 (16.01), 101 (13.97). HRMS (EI) calcd. for  $\text{C}_{20}\text{H}_{18}$ : 258.1409, found: 258.1402.

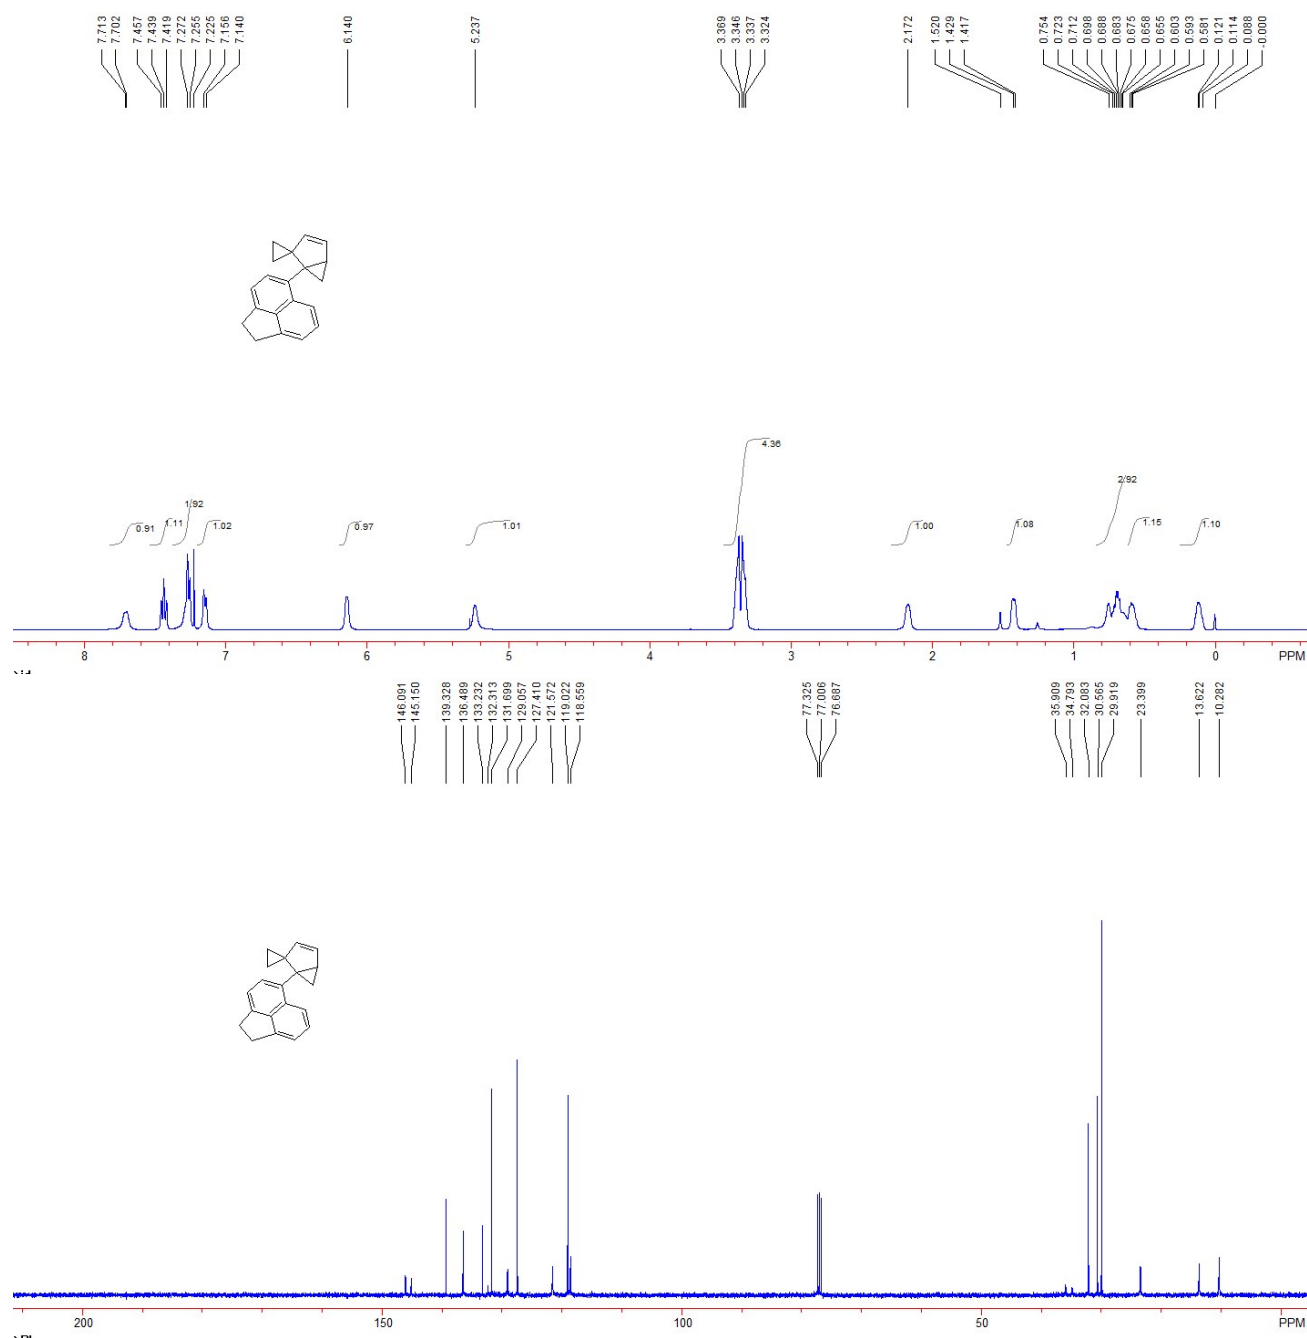

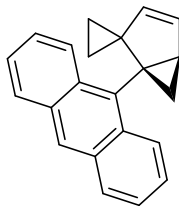

**1-Phenylspiro[bicyclo[3.1.0]hexane-2,1'-cyclopropan]-3-ene 5f:**

39 mg, yield = 68%. A white solid, mp: 95-97 °C. <sup>1</sup>H NMR (400 MHz, CDCl<sub>3</sub>, TMS): δ 0.02-0.07 (m, 1H, CH<sub>2</sub>), 0.60-0.64 (m, 1H, CH<sub>2</sub>), 0.73-0.78 (m, 1H, CH<sub>2</sub>), 1.15-1.20 (m, 1H, CH<sub>2</sub>), 1.36-1.37 (m, 1H, CH<sub>2</sub>), 1.55-1.59 (m, 1H, CH<sub>2</sub>), 2.37-2.40 (m, 1H, CH), 5.34 (d, *J* = 5.6 Hz, 1H, =CH), 6.29 (dd, *J*<sub>1</sub> = 5.6 Hz, *J*<sub>2</sub> = 2.4 Hz, 1H, =CH), 7.43-7.56 (m, 4H, Ar), 7.98-8.02 (m, 2H, Ar), 8.37-8.41 (m, 2H, Ar), 8.70 (d, *J* = 8.4 Hz, 1H, Ar). <sup>13</sup>C NMR (100 MHz, CDCl<sub>3</sub>, TMS): δ 8.8, 13.0, 27.0, 30.9, 34.6, 37.3, 124.7, 124.9, 125.1, 125.3, 125.9, 126.8, 128.8, 131.42, 131.45, 131.47, 132.0, 132.5, 133.3, 136.7. IR (CH<sub>2</sub>Cl<sub>2</sub>) ν 3050, 2999, 2916, 1623, 1442, 1322, 1016, 906, 791 cm<sup>-1</sup>. MS (%) *m/z* 282 (M<sup>+</sup>, 18.23), 267 (9.10), 254 (26.90), 239 (8.43), 191 (100.00), 178 (6.22), 126 (11.37), 114 (1.00), 91 (1.97), 77 (1.50). HRMS (EI) calcd. for C<sub>22</sub>H<sub>18</sub>: 282.1409, found: 282.1412.

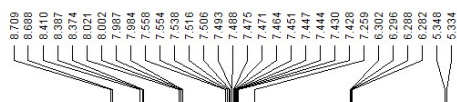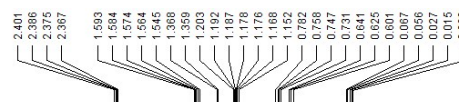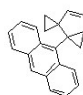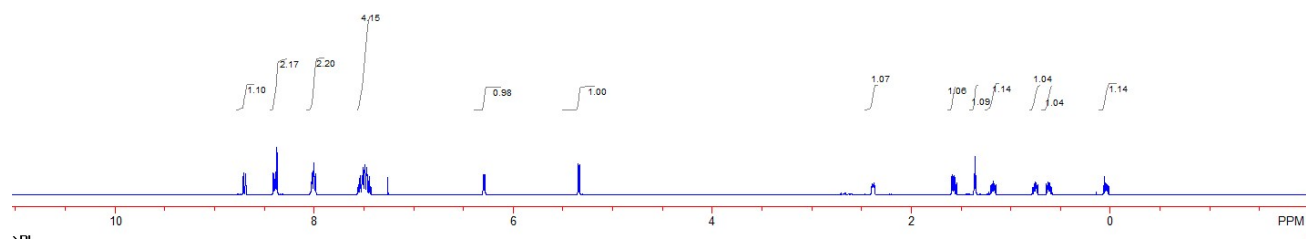

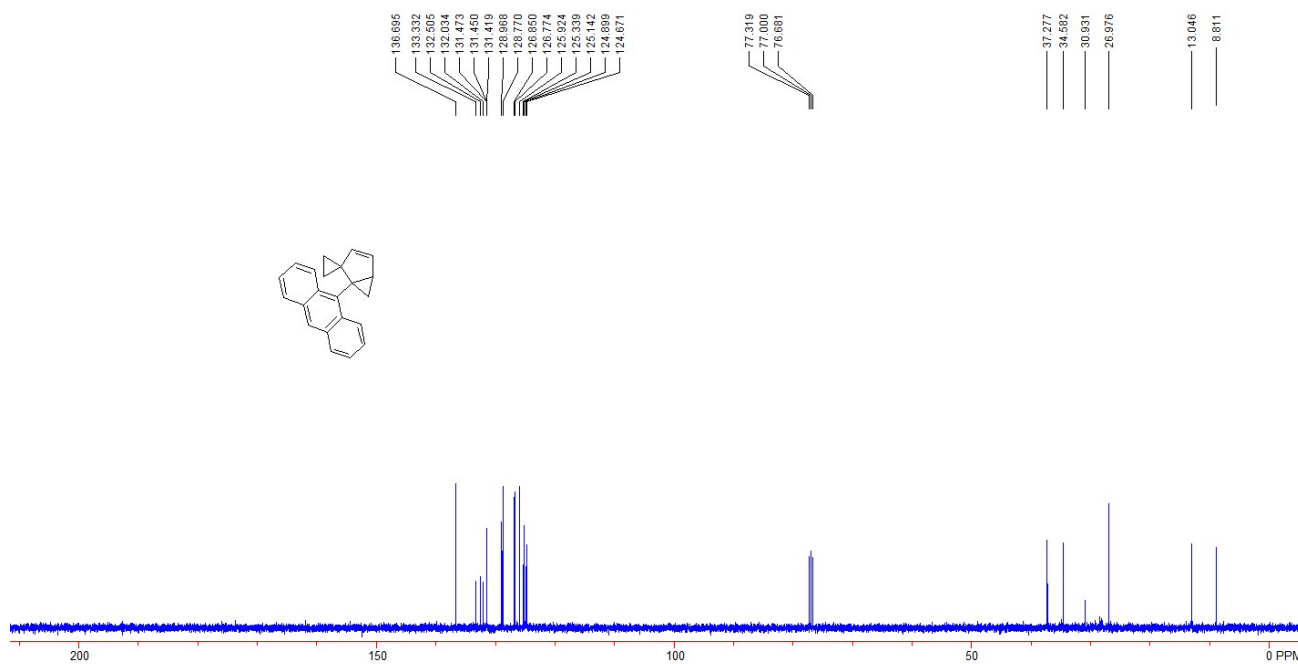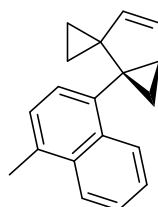

**1-(4-methylnaphthalen-1-yl)spiro[bicyclo[3.1.0]hexane-2,1'-cyclopropan]-3-ene 5g:**

42 mg, yield = 84%. Colorless oil (Mixtures of two diastereomers, dr = 9.9/1). <sup>1</sup>H NMR (400 MHz, CDCl<sub>3</sub>, TMS): δ 0.03-0.08 (m, 1H, CH<sub>2</sub>), 0.55-0.71 (m, 3H, CH<sub>2</sub>), 0.72-0.78 (m, 1H, CH<sub>2</sub>), 1.41-1.44 (m, 1H, CH<sub>2</sub>), 2.18-2.21 (m, 1H, CH), 2.64 (s, 3H, CH<sub>3</sub>), 5.26 (d, *J* = 5.6 Hz, 1H, =CH), 6.16 (dd, *J*<sub>1</sub> = 5.6 Hz, *J*<sub>2</sub> = 2.0 Hz, 1H, =CH), 7.17 (d, *J* = 7.6 Hz, 1H, Ar), 7.24 (d, *J* = 6.8 Hz, 1H, Ar), 7.49 (dd, *J*<sub>1</sub> = 6.8 Hz, *J*<sub>2</sub> = 3.6 Hz, 1H, Ar), 7.96-7.99 (m, 1H, Ar), 8.08-8.11 (m, 1H, Ar). <sup>13</sup>C NMR (100 MHz, CDCl<sub>3</sub>, TMS): δ 10.4, 13.9, 19.5, 23.6, 32.7, 35.6, 36.2, 124.4, 125.3, 125.9, 127.0, 127.6, 131.7, 132.6, 133.6, 133.9, 135.7, 136.7. IR (CH<sub>2</sub>Cl<sub>2</sub>) ν 2989, 1275, 1261, 973, 878, 836, 752, 725 cm<sup>-1</sup>. MS (%) *m/z* 246 (M<sup>+</sup>, 21.86), 231 (74.66), 218 (100.00), 203 (45.02), 189 (13.77), 155 (49.96), 115 (17.63), 108 (15.66), 95 (1.09). HRMS (EI) calcd. for C<sub>19</sub>H<sub>18</sub>: 246.1409, found: 246.1404.

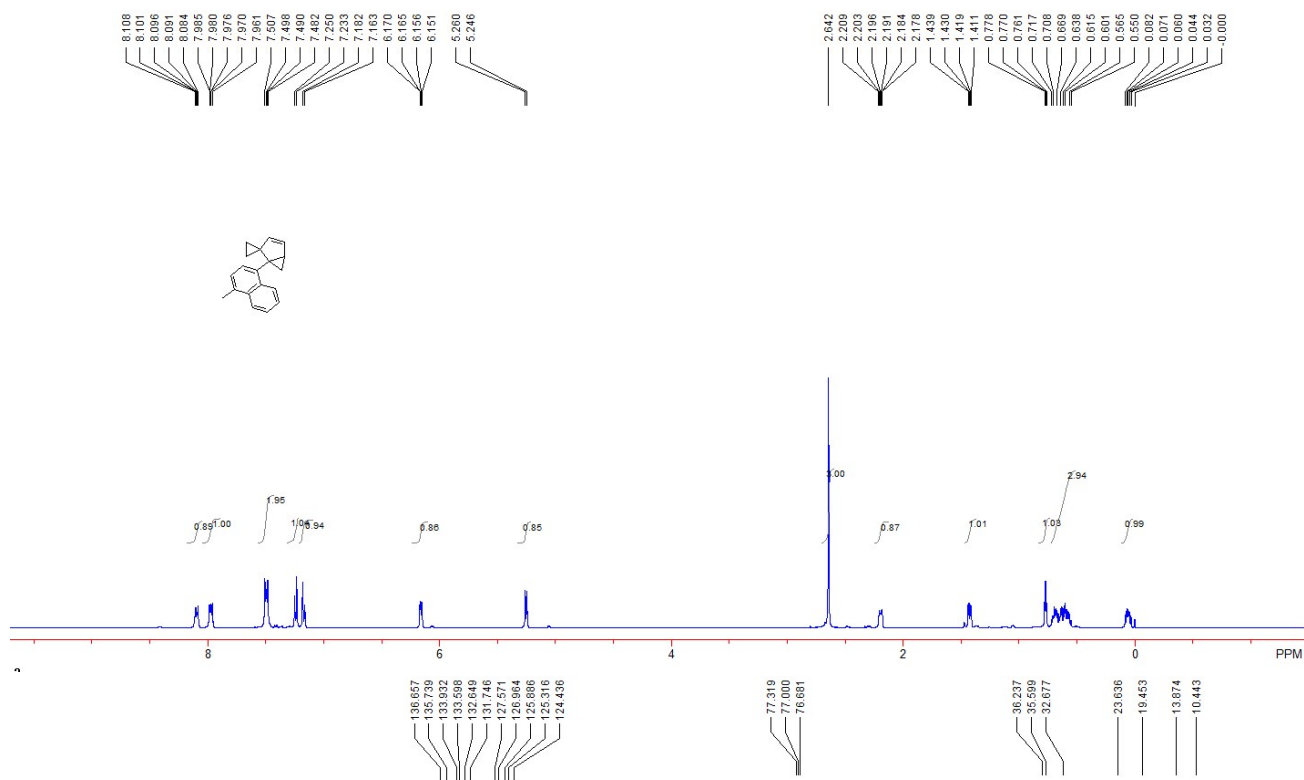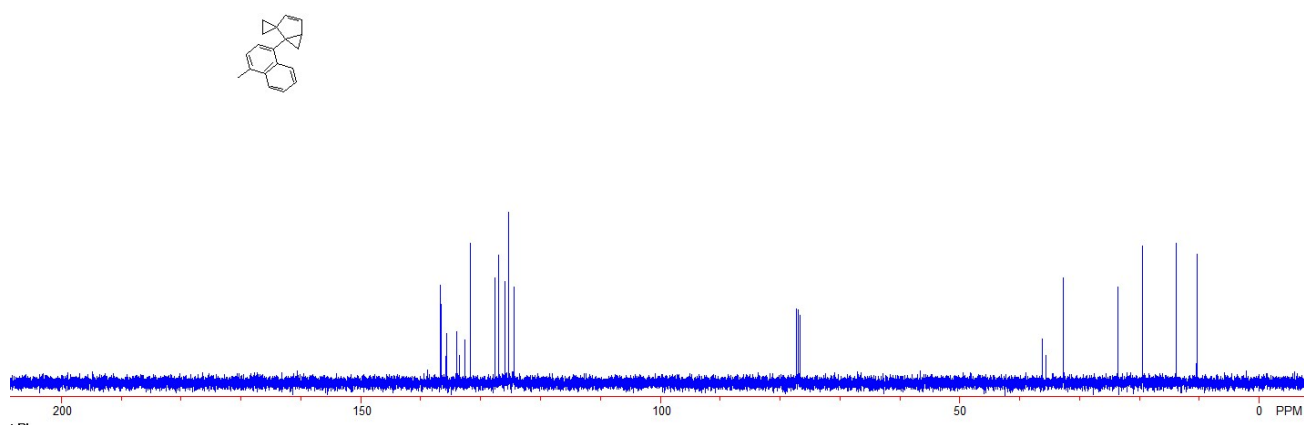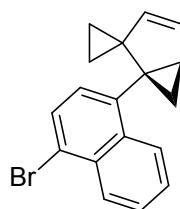

**1-(4-bromonaphthalen-1-yl)spiro[bicyclo[3.1.0]hexane-2,1'-cyclopropan]-3-ene 5h:**

51 mg, yield = 82%. Colorless oil (Mixtures of two diastereomers, dr = 11.6/1). <sup>1</sup>H NMR (400 MHz, CDCl<sub>3</sub>, TMS): δ 0.03-0.09 (m, 1H, CH<sub>2</sub>), 0.59-0.68 (m, 2H, CH<sub>2</sub>), 0.71-0.77 (m, 1H, CH<sub>2</sub>), 0.83-0.84 (m, 1H, CH<sub>2</sub>), 1.43-1.46 (m, 1H, CH<sub>2</sub>), 2.23-2.25 (m, 1H, CH), 5.29 (d, *J* = 5.6 Hz, 1H, =CH), 6.19

(dd,  $J_1 = 5.6$  Hz,  $J_2 = 2.0$  Hz, 1H, =CH), 7.22 (d,  $J = 7.6$  Hz, 1H, Ar), 7.55-7.62 (m, 2H, Ar), 7.67 (d,  $J = 7.6$  Hz, 1H, Ar), 8.11 (d,  $J = 8.8$  Hz, 1H, Ar), 8.26-8.28 (m, 1H, Ar).  $^{13}\text{C}$  NMR (100 MHz,  $\text{CDCl}_3$ , TMS):  $\delta$  10.5, 13.9, 23.5, 32.9, 35.4, 36.3, 122.2, 126.5, 126.86, 126.93, 127.5, 128.2, 129.2, 131.6, 131.8, 135.1, 136.7, 137.8. IR ( $\text{CH}_2\text{Cl}_2$ )  $\nu$  1587, 1505, 1387, 912, 836, 755, 724, 659  $\text{cm}^{-1}$ . MS (%)  $m/z$  310 ( $\text{M}^+$ , 9.18), 284 (54.07), 231 (81.95), 215 (100.00), 202 (88.07), 189 (13.52), 163 (9.08), 126 (11.22), 108 (27.80). HRMS (EI) calcd. for  $\text{C}_{18}\text{H}_{15}\text{Br}$ : 310.0357, found: 310.0355.

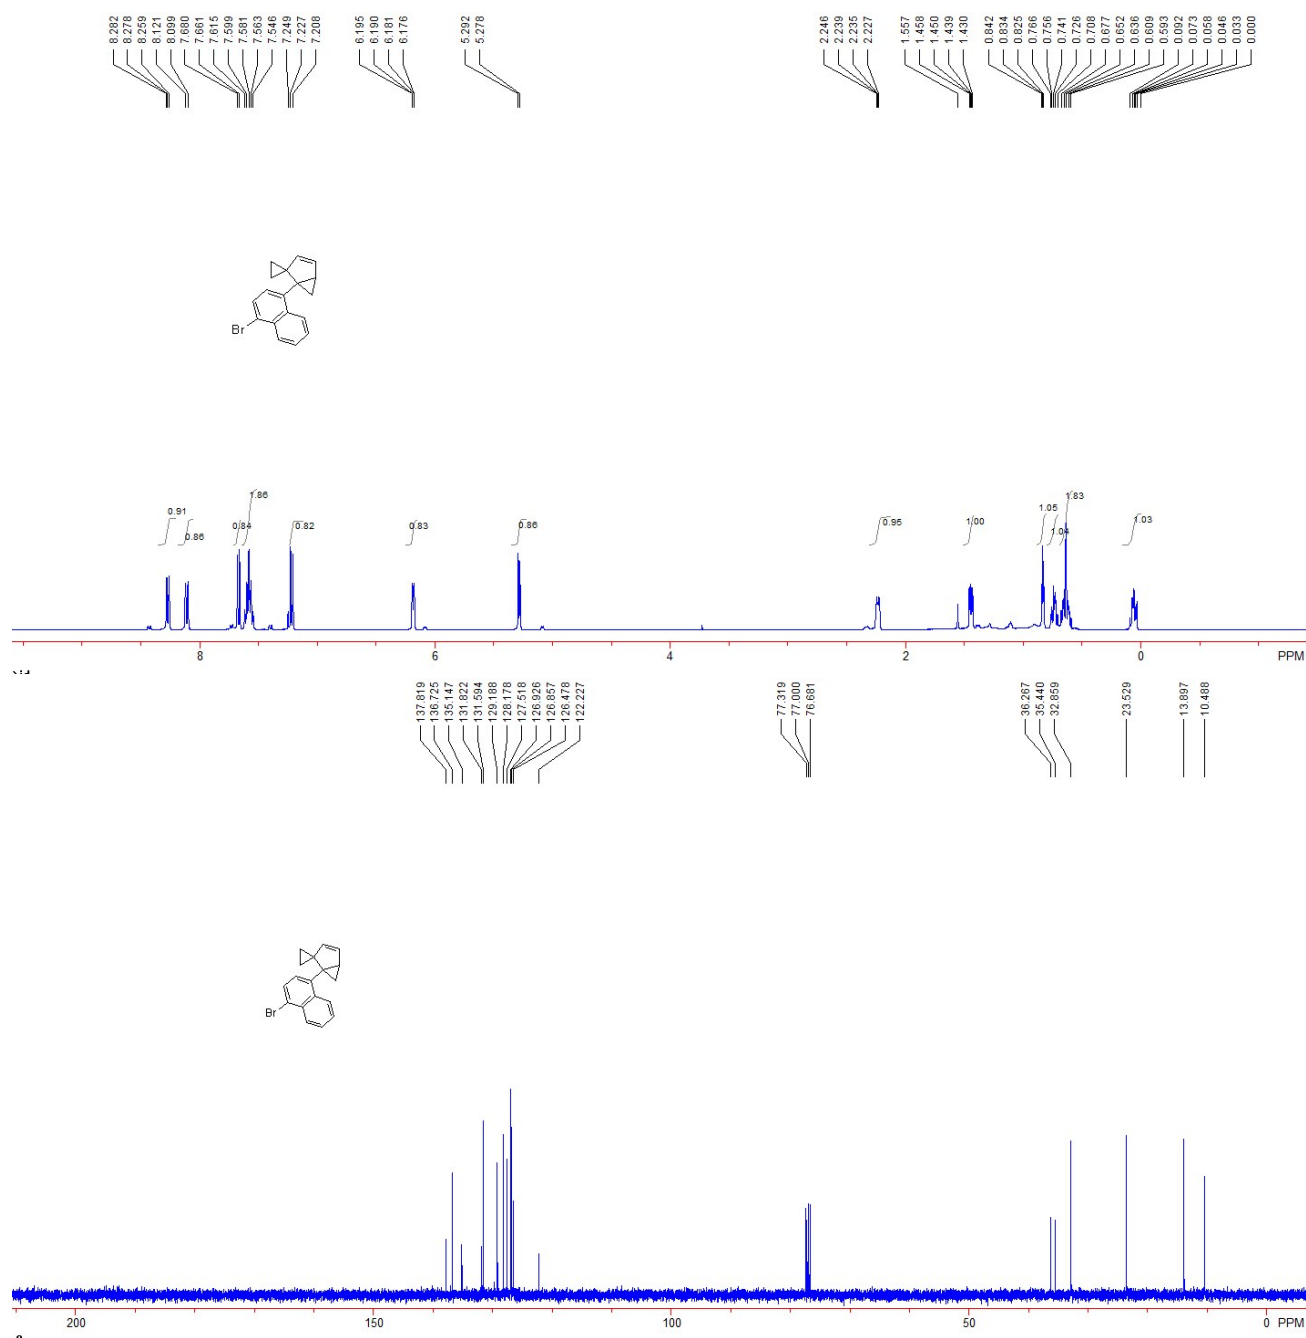

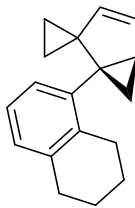

**1-(5,6,7,8-tetrahydronaphthalen-1-yl)spiro[bicyclo[3.1.0]hexane-2,1'-cyclopropan]-3-ene 5j:**

39 mg, yield = 83%. Colorless oil (Mixtures of two diastereomers, dr = 22.7/1).  $^1\text{H}$  NMR (400 MHz,  $\text{CDCl}_3$ , TMS):  $\delta$  0.26-0.30 (m, 1H,  $\text{CH}_2$ ), 0.57-0.70 (m, 4H,  $\text{CH}_2$ ), 1.29-1.31 (m, 1H,  $\text{CH}_2$ ), 1.70-1.78 (m, 2H,  $\text{CH}_2$ ), 1.80-1.86 (m, 2H,  $\text{CH}_2$ ), 2.07-2.80 (m, 1H, CH), 2.69-2.70 (m, 2H,  $\text{CH}_2$ ), 2.71-2.77 (m, 2H,  $\text{CH}_2$ ), 5.13 (d,  $J = 5.6$  Hz, 1H, =CH), 6.02 (dd,  $J_1 = 5.6$  Hz,  $J_2 = 2.0$  Hz, 1H, =CH), 6.94-7.01 (m, 3H, Ar).  $^{13}\text{C}$  NMR (100 MHz,  $\text{CDCl}_3$ , TMS):  $\delta$  9.8, 12.8, 23.1, 23.2, 24.1, 26.4, 29.9, 31.7, 34.9, 36.0, 124.8, 128.0, 128.3, 131.7, 136.1, 137.0, 138.4, 139.2. IR ( $\text{CH}_2\text{Cl}_2$ )  $\nu$  3058, 2928, 2857, 1580, 1452, 1047, 971, 831, 722  $\text{cm}^{-1}$ . MS (%)  $m/z$  236 (63.93), 208 (100.00), 193 (60.12), 179 (74.89), 165 (64.71), 152 (19.80), 128 (19.21), 115 (28.30), 89 (16.81). HRMS (EI) calcd. for  $\text{C}_{18}\text{H}_{20}$ : 236.1565, found: 236.1569.

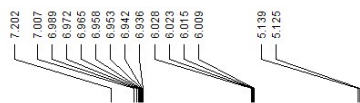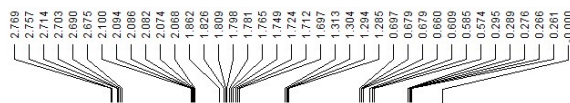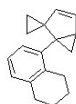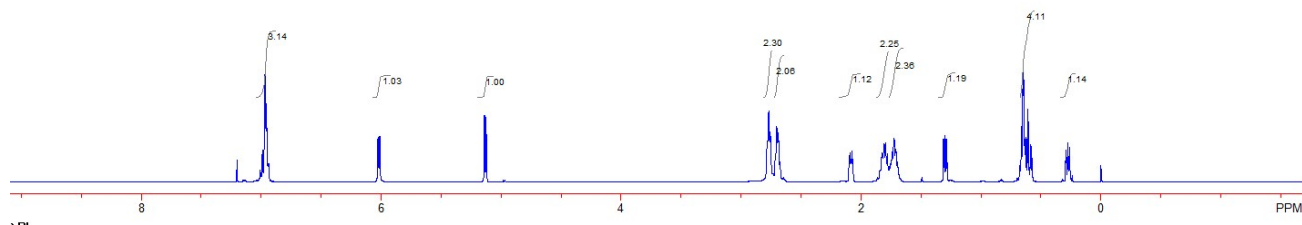

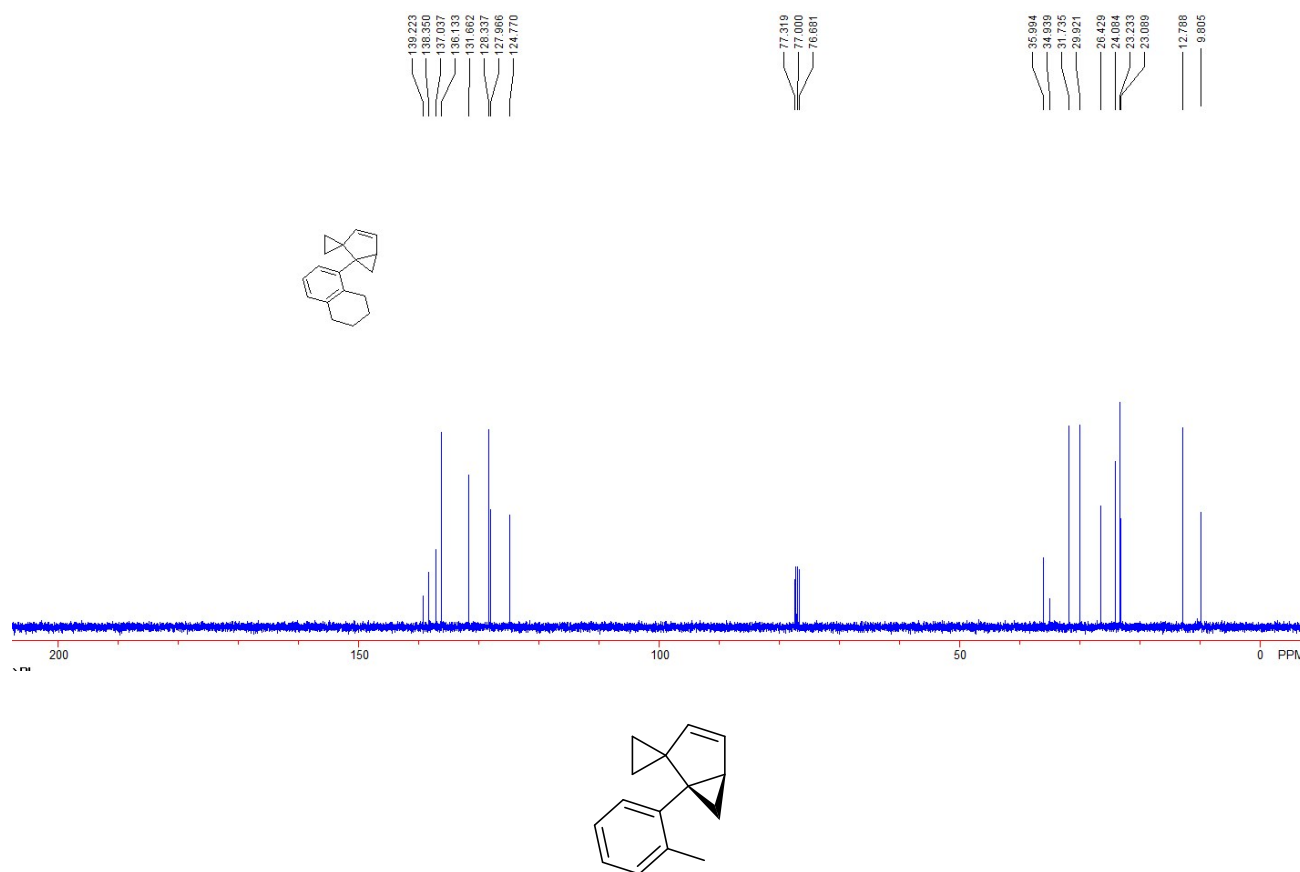

**1-(o-tolyl)spiro[bicyclo[3.1.0]hexane-2,1'-cyclopropan]-3-ene 5k:**

32 mg, yield = 80%. Colorless oil (Mixtures of two diastereomers, dr = 15.9/1). <sup>1</sup>H NMR (400 MHz, CDCl<sub>3</sub>, TMS): δ 0.26-0.29 (m, 1H, CH<sub>2</sub>), 0.59-0.60 (m, 1H, CH<sub>2</sub>), 0.62-0.69 (m, 3H, CH<sub>2</sub>), 1.32-1.34 (m, 1H, CH<sub>2</sub>), 2.07-2.10 (m, 1H, CH), 2.29 (s, 3H, CH<sub>3</sub>), 5.14 (d, *J* = 5.6 Hz, 1H, =CH), 6.03 (dd, *J*<sub>1</sub> = 5.6 Hz, *J*<sub>2</sub> = 2.0 Hz, 1H, =CH), 7.05-7.09 (m, 1H, Ar), 7.10-7.13 (m, 3H, Ar). <sup>13</sup>C NMR (100 MHz, CDCl<sub>3</sub>, TMS): δ 9.7, 12.8, 19.5, 23.8, 31.8, 35.1, 36.1, 125.3, 126.8, 129.8, 130.8, 131.6, 136.2, 138.8, 140.2. IR (CH<sub>2</sub>Cl<sub>2</sub>) ν 3060, 2989, 1587, 1490, 971, 877, 833, 750, 724 cm<sup>-1</sup>. MS (%) *m/z* 196 (12.52), 181 (100.00), 167 (98.03), 153 (48.96), 128 (19.41), 115 (34.53), 105 (31.70), 89 (31.73), 77 (23.03). HRMS (EI) calcd. for C<sub>15</sub>H<sub>16</sub>: 196.1252, found: 196.1255.

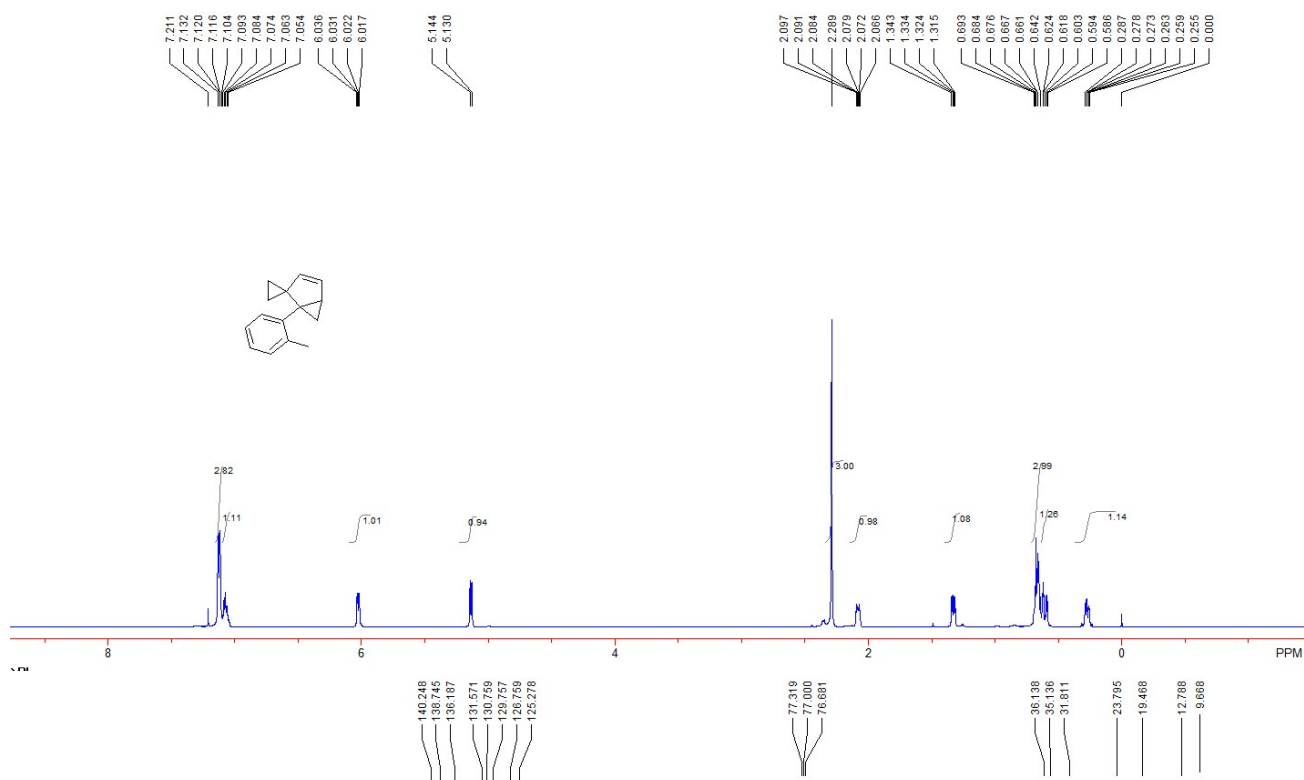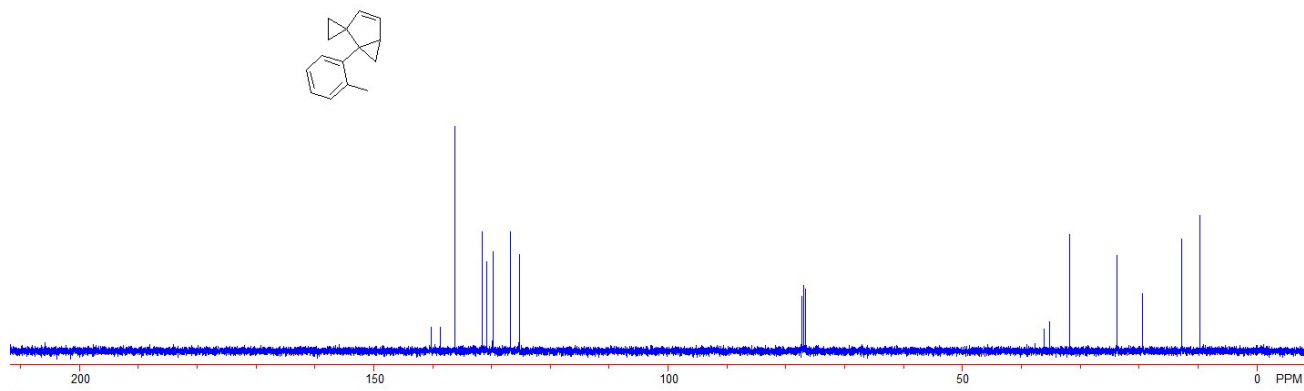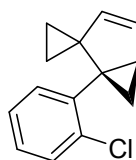

**1-(2-chlorophenyl)spiro[bicyclo[3.1.0]hexane-2,1'-cyclopropan]-3-ene 5l:**

34 mg, yield = 79%. Colorless oil.  $^1\text{H}$  NMR (400 MHz,  $\text{CDCl}_3$ , TMS):  $\delta$  0.28-0.32 (m, 1H,  $\text{CH}_2$ ), 0.59-0.73 (m, 4H,  $\text{CH}_2$ ), 1.31 (b, 1H,  $\text{CH}_2$ ), 2.21-2.25 (m, 1H,  $\text{CH}_2$ ), 5.13 (br, 1H,  $=\text{CH}$ ), 6.02 (d,  $J$  = 4.0 Hz, 1H,  $=\text{CH}$ ), 7.14-7.16 (m, 2H, Ar), 7.21-7.25 (m, 1H, Ar), 7.32-7.34 (m, 1H, Ar).  $^{13}\text{C}$  NMR (100 MHz,  $\text{CDCl}_3$ , TMS):  $\delta$  9.5, 13.0, 23.7, 32.4, 35.0, 36.1, 126.3, 128.0, 129.4, 131.4, 132.5, 136.0,

138.3. IR (CH<sub>2</sub>Cl<sub>2</sub>)  $\nu$  3060, 2992, 1476, 1432, 1057, 826, 750, 725, 707 cm<sup>-1</sup>. MS (%) m/z 216 (M<sup>+</sup>, 5.11), 201 (9.96), 188 (100.00), 181 (36.72), 165 (43.10), 152 (30.59), 127 (6.85), 115 (8.43), 89 (16.73). HRMS (EI) calcd. for C<sub>14</sub>H<sub>13</sub>Cl: 216.0706, found: 216.0703.

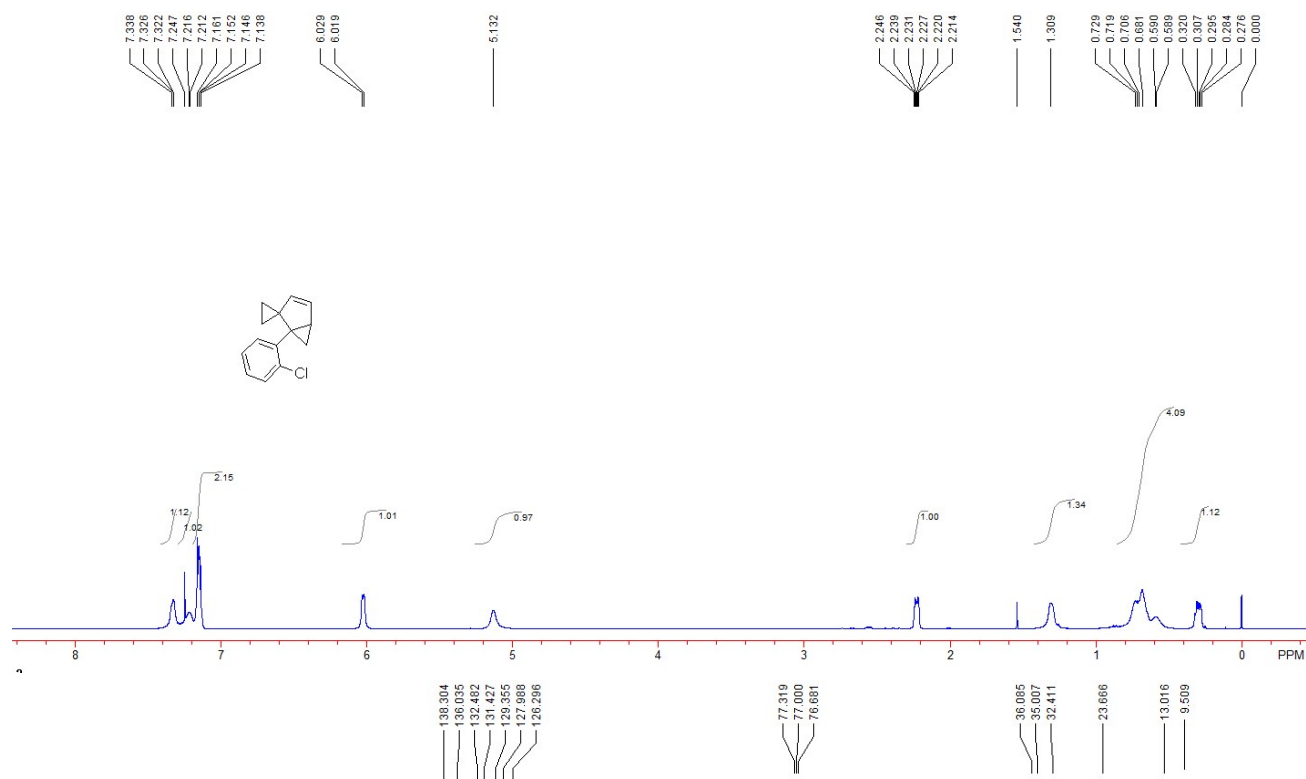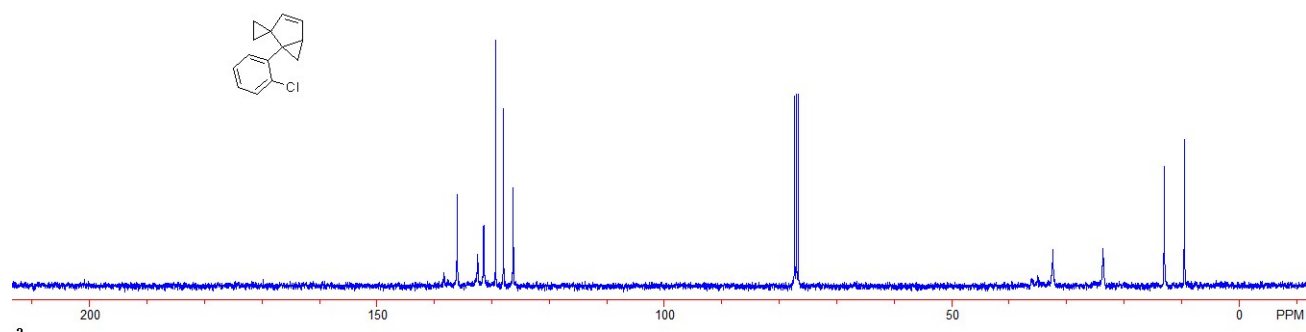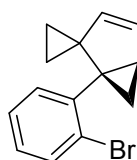

**1-(2-bromophenyl)spiro[bicyclo[3.1.0]hexane-2,1'-cyclopropan]-3-ene 5m:**

34 mg, yield = 65%. Colorless oil (Mixtures of two diastereomers, dr = 5.2/1). <sup>1</sup>H NMR (400 MHz, CDCl<sub>3</sub>, TMS):  $\delta$  0.32-0.33 (m, 1H, CH<sub>2</sub>), 0.57-0.68 (m, 1H, CH<sub>2</sub>), 0.69-0.77 (m, 3H, CH<sub>2</sub>), 1.30-1.31

(m, 1H, CH<sub>2</sub>), 2.26 (br, 1H, CH), 5.14 (d, *J* = 5.2 Hz, 1H, =CH), 6.04 (d, *J* = 3.6 Hz, 1H, =CH), 7.07 (br, 1H, Ar), 7.20-7.24 (m, 2H, Ar), 7.54 (d, *J* = 7.6 Hz, 1H, Ar). <sup>13</sup>C NMR (100 MHz, CDCl<sub>3</sub>, TMS): δ 9.5, 13.4, 24.1, 32.7, 35.0, 37.8, 125.1, 126.9, 128.1, 128.2, 131.6, 132.7, 132.9, 136.0, 139.8. IR (CH<sub>2</sub>Cl<sub>2</sub>) ν 3059, 2992, 1473, 1425, 1024, 750, 724, 687 cm<sup>-1</sup>. MS (%) *m/z* 260 (M<sup>+</sup>, 1.21), 232 (100.00), 181 (45.84), 165 (75.76), 152 (64.65), 89 (43.88), 76 (52.22), 63 (19.75), 51 (18.16). HRMS (EI) calcd. for C<sub>14</sub>H<sub>13</sub>Br: 260.0201, found: 260.0200.

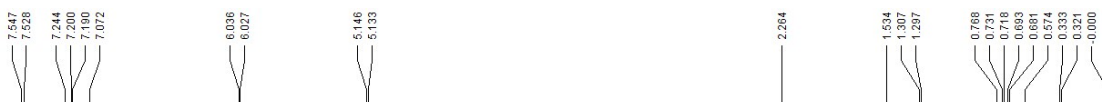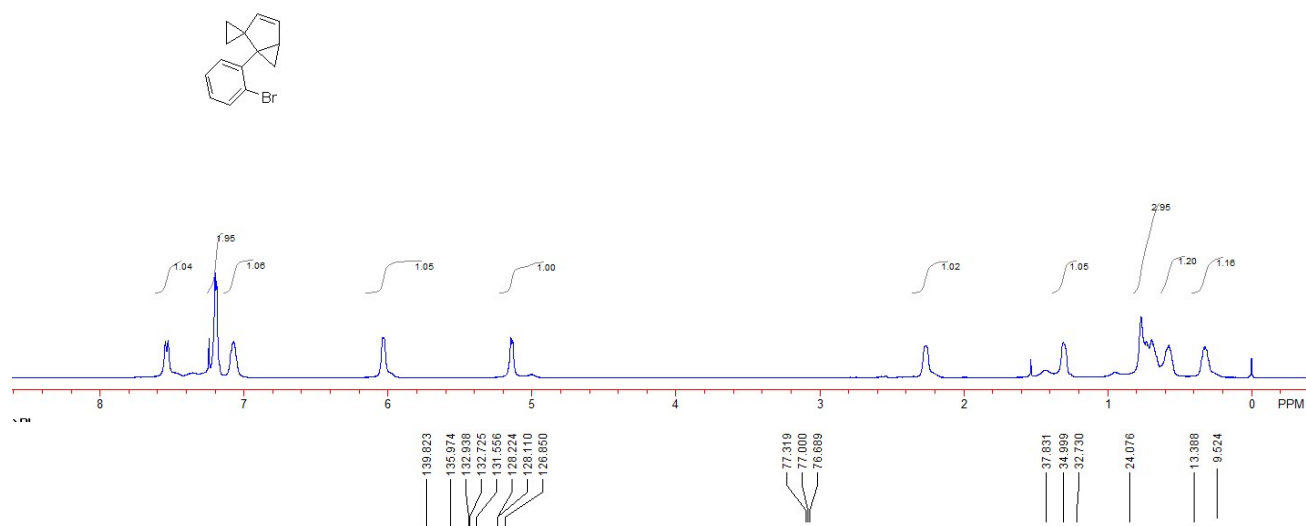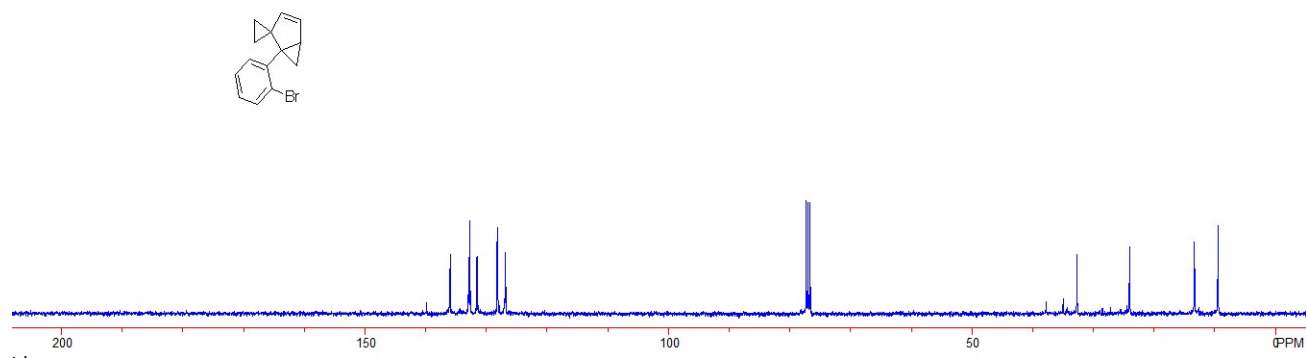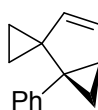

**1-Phenylspiro[bicyclo[3.1.0]hexane-2,1'-cyclopropan]-3-ene 5m':**

30 mg, yield = 83%. Colorless oil.  $^1\text{H}$  NMR (400 MHz,  $\text{CDCl}_3$ , TMS):  $\delta$  0.37-0.42 (m, 1H,  $\text{CH}_2$ ), 0.61-0.65 (m, 2H,  $\text{CH}_2$ ), 0.69-0.74 (m, 2H,  $\text{CH}_2$ ), 1.29-1.32 (m, 1H,  $\text{CH}_2$ ), 2.14-2.18 (m, 1H, CH), 5.08 (d,  $J = 5.6$  Hz, 1H, =CH), 6.01 (dd,  $J_1 = 5.6$  Hz,  $J_2 = 2.0$  Hz, 1H, =CH), 7.17-7.19 (m, 1H, Ar), 7.20-7.25 (m, 4H, Ar).  $^{13}\text{C}$  NMR (100 MHz,  $\text{CDCl}_3$ , TMS):  $\delta$  9.8, 12.8, 23.4, 31.8, 36.4, 36.6, 126.5, 127.9, 130.6, 131.8, 136.3, 140.9. IR ( $\text{CH}_2\text{Cl}_2$ )  $\nu$  3058, 3026, 2990, 1589, 1495, 823, 724, 699  $\text{cm}^{-1}$ . MS (%)  $m/z$  182 ( $\text{M}^+$ , 24.57), 167 (55.15), 154 (100.00), 128 (15.21), 115 (17.72), 91 (21.20), 77 (14.31), 63 (6.38), 51 (11.55). HRMS (EI) calcd. for  $\text{C}_{14}\text{H}_{14}$ : 182.1096, found: 182.1099.

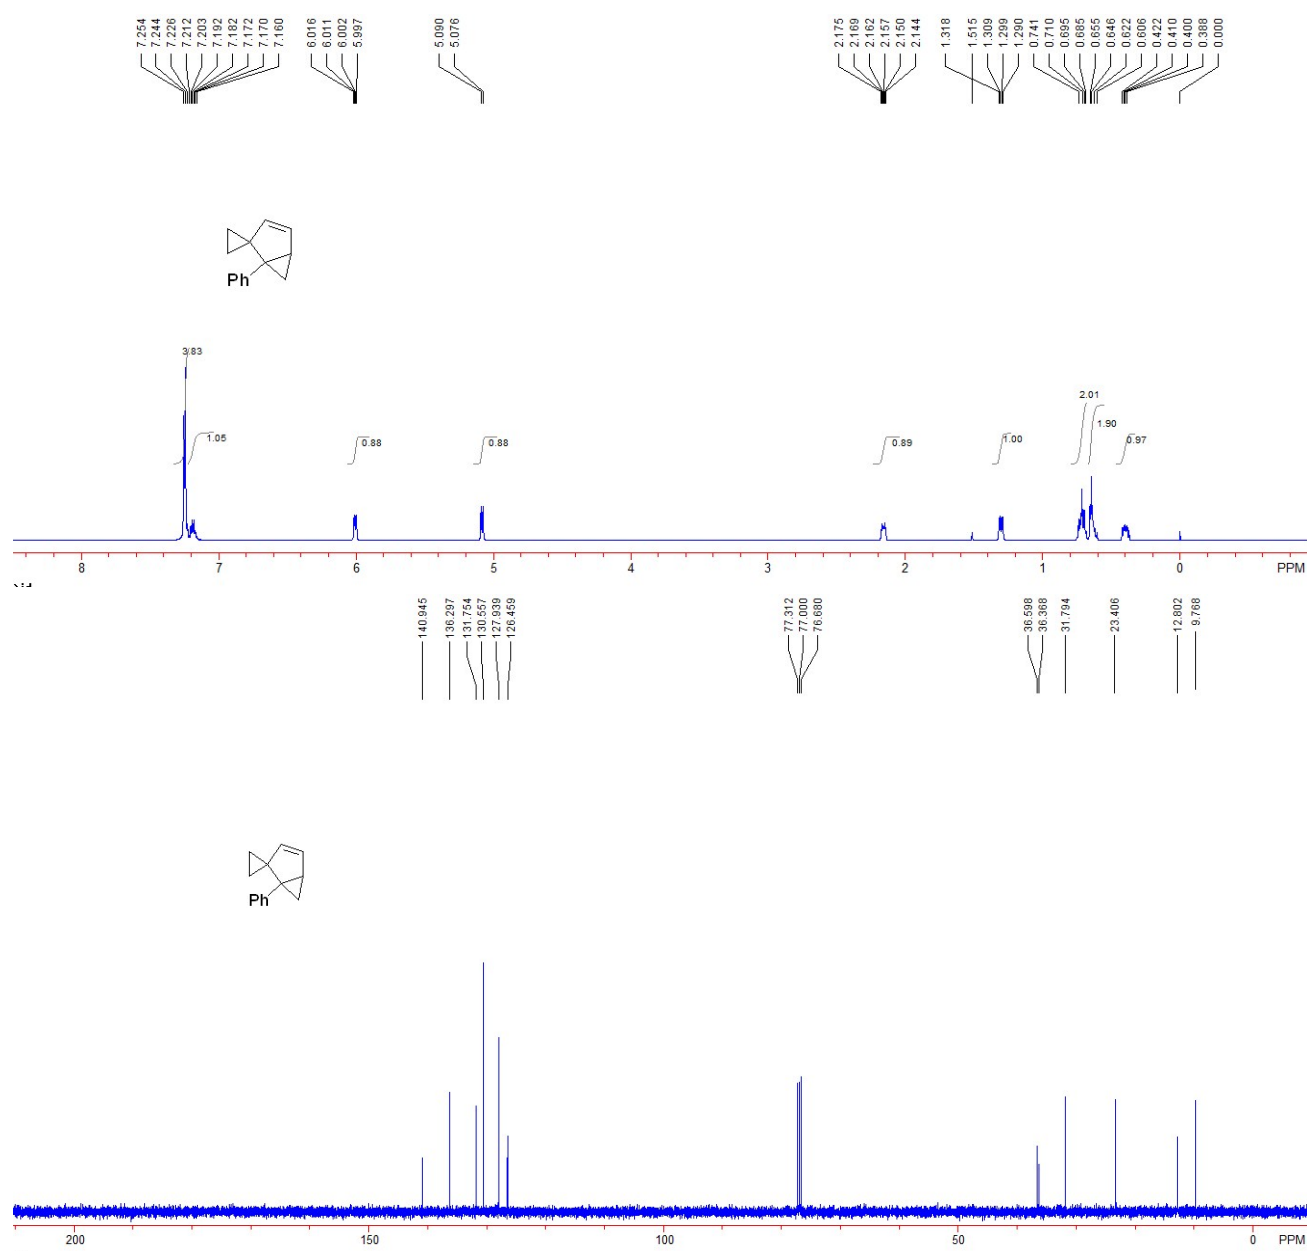

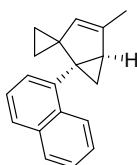

**4-Methyl-1-(naphthalen-1-yl)spiro[bicyclo[3.1.0]hexane-2,1'-cyclopropan]-3-ene 5p:**

38 mg, yield = 78%. Colorless oil (Mixtures of two diastereomers, dr = 8.8/1).  $^1\text{H}$  NMR (400 MHz,  $\text{CDCl}_3$ , TMS):  $\delta$  0.01-0.05 (m, 1H,  $\text{CH}_2$ ), 0.53-0.68 (m, 1H,  $\text{CH}_2$ ), 0.87-0.89 (m, 1H,  $\text{CH}_2$ ), 1.45-1.48 (m, 1H,  $\text{CH}_2$ ), 2.02 (s, 3H,  $\text{CH}_3$ ), 2.09-2.11 (m, 1H, CH), 4.90 (s, 1H, =CH), 7.35-7.39 (m, 2H, Ar), 7.48-7.57 (m, 2H, Ar), 7.74-7.77 (m, 1H, Ar), 7.85-7.87 (m, 1H, Ar), 8.15 (d,  $J = 8.4$  Hz, 1H, Ar).  $^{13}\text{C}$  NMR (100 MHz,  $\text{CDCl}_3$ , TMS):  $\delta$  9.9, 13.5, 16.6, 23.0, 35.68, 35.73, 36.4, 125.1, 125.4, 125.6, 126.4, 127.4, 127.8, 128.3, 129.5, 133.6, 134.0, 137.7, 141.9. IR ( $\text{CH}_2\text{Cl}_2$ )  $\nu$  3040, 2988, 2846, 1594, 1508, 1403, 874, 801, 775  $\text{cm}^{-1}$ . MS (%)  $m/z$  246 ( $\text{M}^+$ , 30.03), 231 (60.33), 218 (100.00), 203 (52.07), 165 (9.57), 141 (74.85), 115 (16.02), 108 (27.03), 100 (4.18). HRMS (EI) calcd. for  $\text{C}_{19}\text{H}_{18}$ : 246.1409, found: 246.1404.

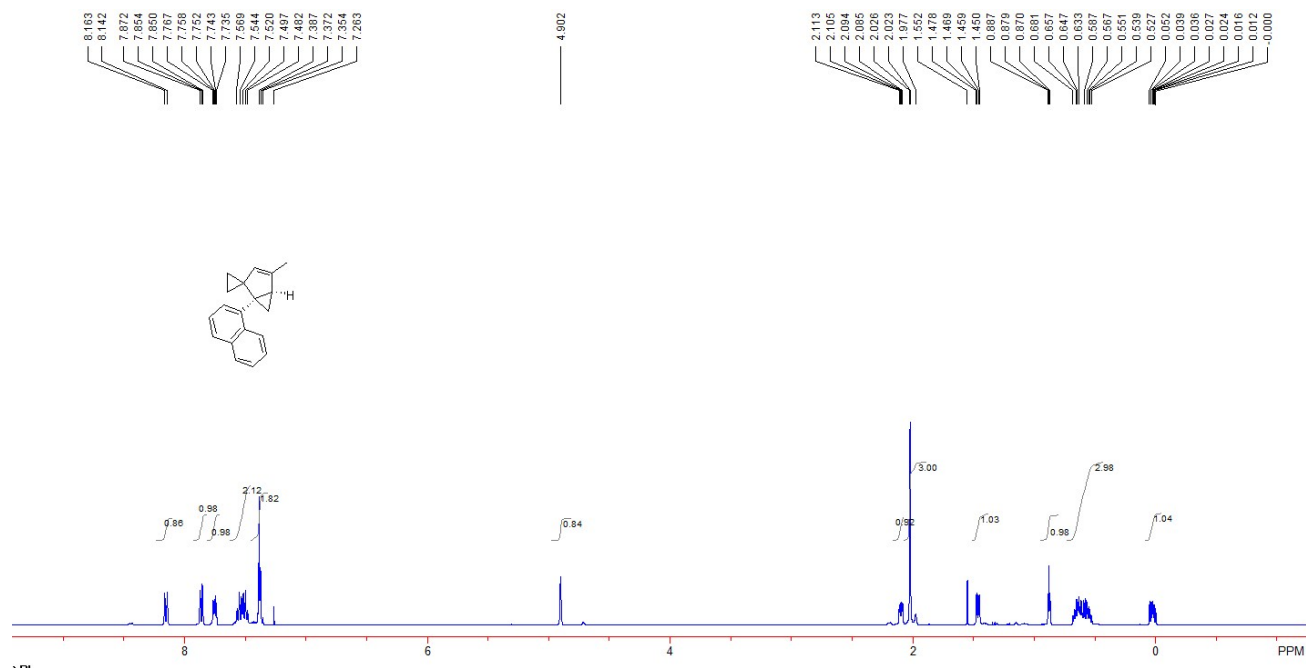

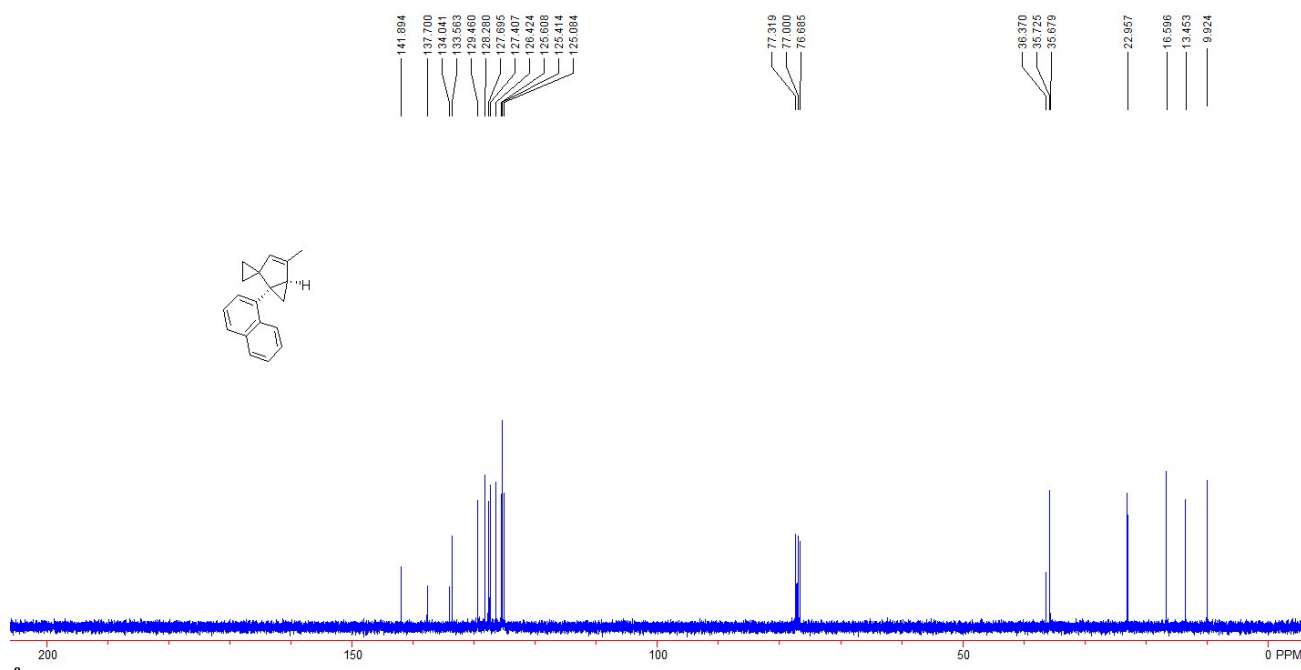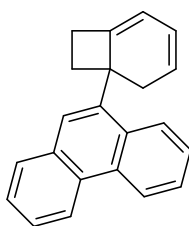

**9-(Bicyclo[4.2.0]octa-3,5-dien-1-yl)phenanthrene 6a:**

54 mg, yield = 95%. A white solid. Mp: 89-91 °C <sup>1</sup>H NMR (400 MHz, CDCl<sub>3</sub>, TMS): δ 2.34-2.41 (m, 1H, CH<sub>2</sub>), 2.54-2.59 (m, 1H, CH<sub>2</sub>), 2.67-2.73 (m, 1H, CH<sub>2</sub>), 2.76-2.86 (m, 3H, CH<sub>2</sub>), 5.38-5.42 (m, 1H, =CH), 5.96-6.04 (m, 2H, =CH), 7.50-7.61 (m, 4H, Ar), 7.75 (s, 1H, Ar), 7.82 (d, *J* = 8.0 Hz, 1H, Ar), 7.89 (d, *J* = 8.4 Hz, 1H, Ar), 8.60 (d, *J* = 8.0 Hz, 1H, Ar), 8.72 (d, *J* = 8.0 Hz, 1H, Ar). <sup>13</sup>C NMR (100 MHz, CDCl<sub>3</sub>, TMS): δ 30.2, 35.5, 36.2, 46.0, 114.9, 122.3, 123.8, 124.0, 124.7, 125.0, 125.69, 125.75, 125.8, 126.1, 126.6, 128.6, 129.0, 129.9, 131.5, 136.0, 141.7. IR (CH<sub>2</sub>Cl<sub>2</sub>) ν 3049, 2929, 1674, 1424, 1264, 1045, 907, 727, 703 cm<sup>-1</sup>. MS (%) *m/z* 282 (M<sup>+</sup>, 52.05), 267 (33.75), 254 (100.00), 239 (14.53), 226 (7.36), 202 (18.44), 191 (66.57), 165 (10.30), 126 (26.67). HRMS (EI) calcd. for C<sub>22</sub>H<sub>18</sub>: 282.1409, found: 282.1411.

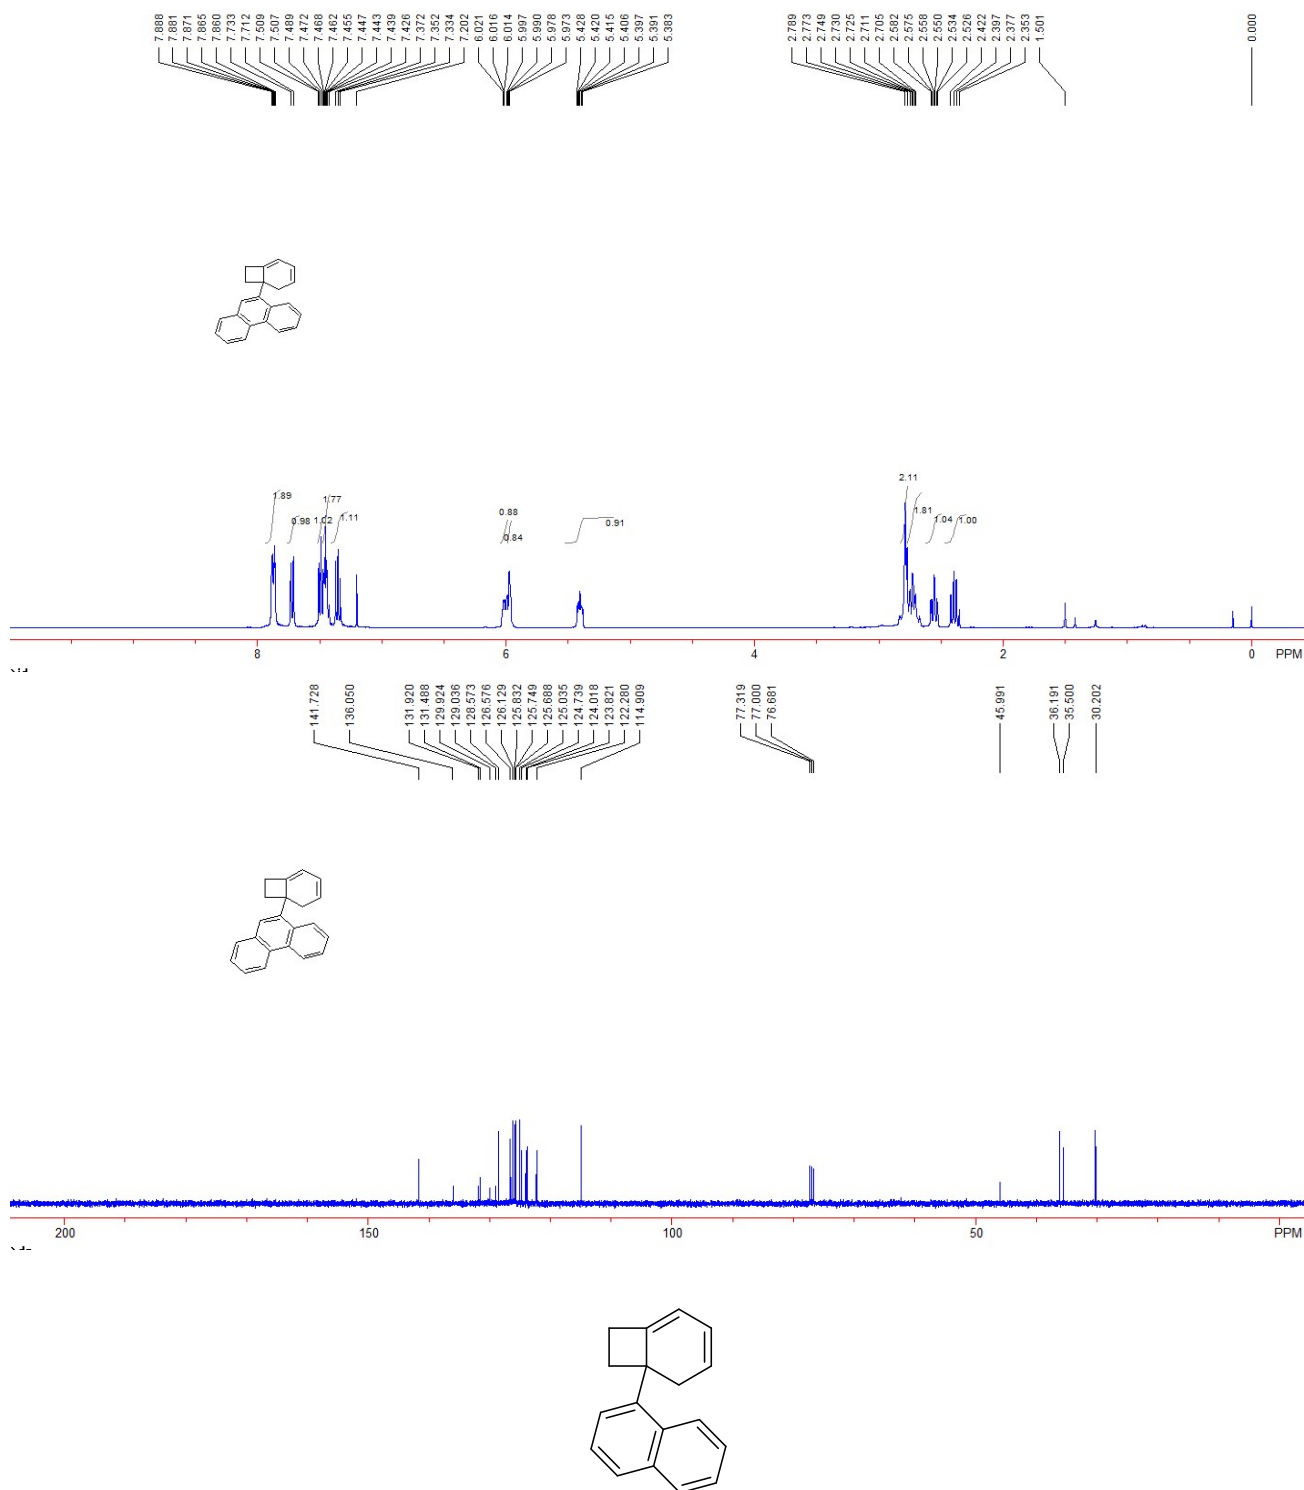

**1-(Bicyclo[4.2.0]octa-3,5-dien-1-yl)naphthalene 6b:**

40 mg, 87%. Colorless oil. <sup>1</sup>H NMR (400 MHz, CDCl<sub>3</sub>, TMS): δ 2.34-2.41 (m, 1H, CH<sub>2</sub>), 2.52-2.58 (m, 1H, CH<sub>2</sub>), 2.70-2.72 (m, 2H, CH<sub>2</sub>), 2.74-2.78 (m, 2H, CH<sub>2</sub>), 5.38-5.42 (m, 1H, =CH), 5.96-6.02 (m, 2H, =CH), 7.33-7.37 (m, 1H, Ar), 7.42-7.45 (m, 2H, Ar), 7.46-7.51 (m, 1H, Ar), 7.71 (d, *J* = 8.4 Hz, 1H, Ar), 7.85-7.88 (m, 2H, Ar). <sup>13</sup>C NMR (100 MHz, CDCl<sub>3</sub>, TMS): δ 30.2, 35.8, 36.7, 46.0, 114.7, 124.0, 124.5, 124.99, 125.02, 125.09, 125.13, 127.3, 129.5, 130.0, 135.0, 138.8, 142.0. IR

(CH<sub>2</sub>Cl<sub>2</sub>)  $\nu$  3040, 2932, 2855, 1674, 1508, 907, 777, 732, 669 cm<sup>-1</sup>. MS (%) m/z 232 (M<sup>+</sup>, 72.60), 215 (47.19), 204 (100.00), 189 (13.82), 178 (8.72), 141 (55.90), 115 (15.29), 101 (39.08), 77 (12.90). HRMS (EI) calcd. for C<sub>18</sub>H<sub>16</sub>: 232.1252, found: 232.1251.

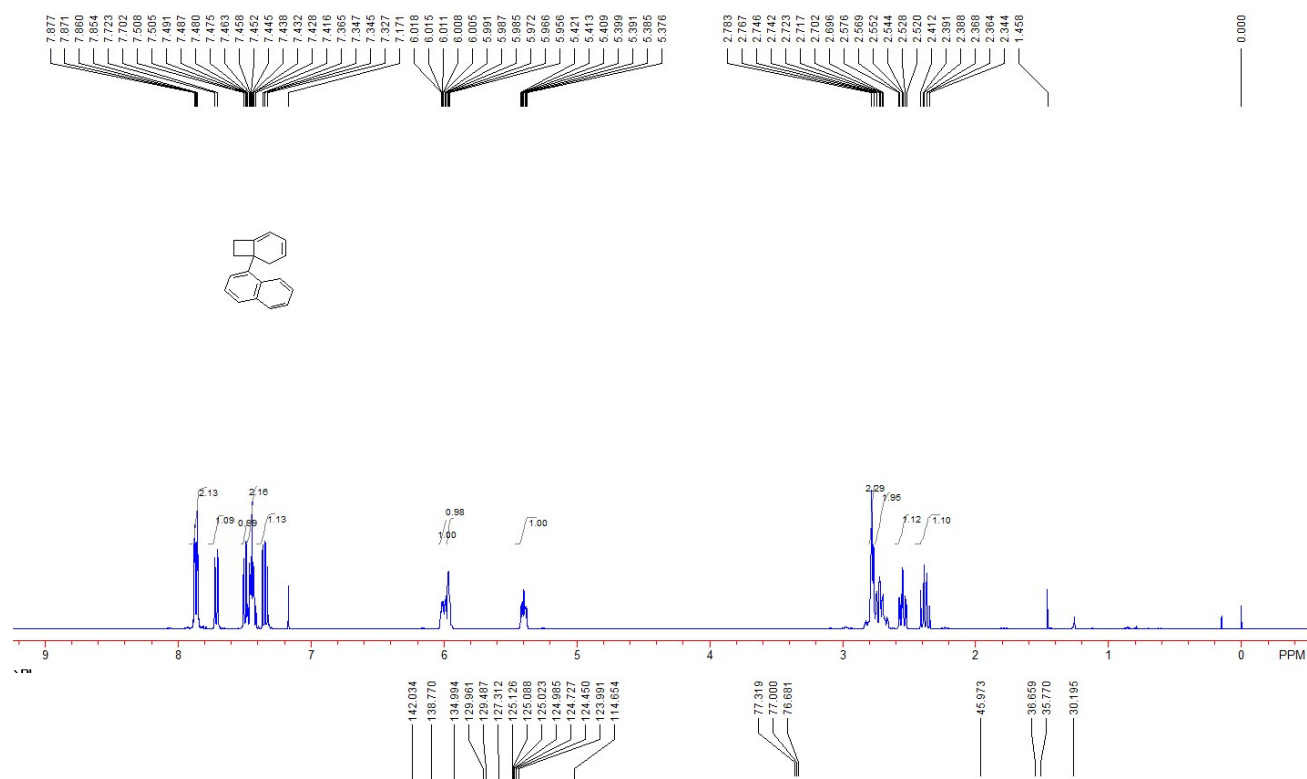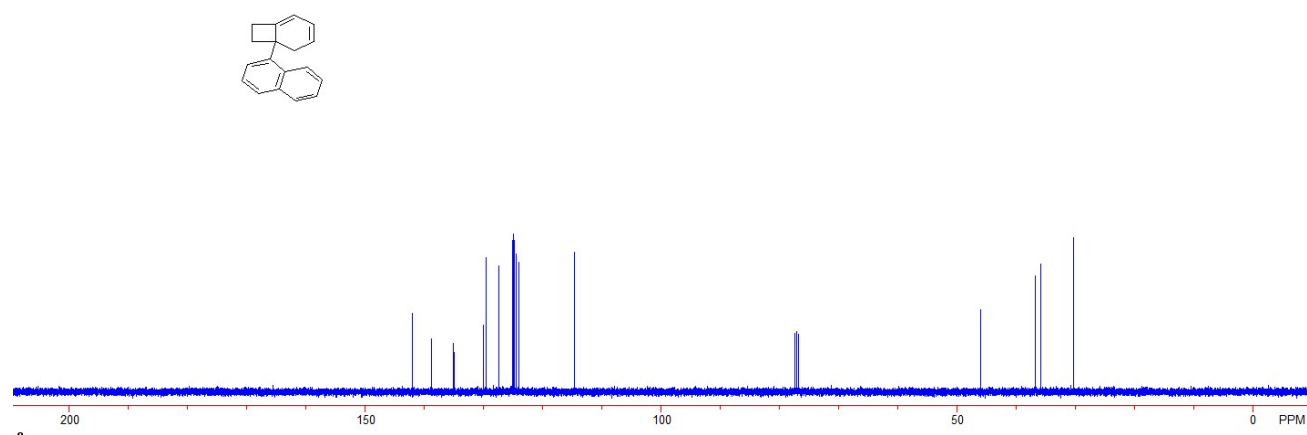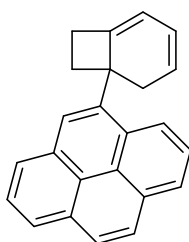

**4-(Bicyclo[4.2.0]octa-3,5-dien-1-yl)pyrene 6c:**

S116

63 mg, yield = 90%. A white solid. Mp: 89-91 °C  $^1\text{H}$  NMR (400 MHz,  $\text{CDCl}_3$ , TMS):  $\delta$  2.48-2.55 (m, 1H,  $\text{CH}_2$ ), 2.64-2.70 (m, 1H,  $\text{CH}_2$ ), 2.74-2.77 (m, 2H,  $\text{CH}_2$ ), 2.80-2.95 (m, 2H,  $\text{CH}_2$ ), 5.38-5.42 (m, 1H, =CH), 6.05-6.07 (m, 2H, =CH), 7.90-7.99 (m, 3H, Ar), 8.02-8.06 (m, 3H, Ar), 8.08-8.18 (m, 3H, Ar).  $^{13}\text{C}$  NMR (100 MHz,  $\text{CDCl}_3$ , TMS):  $\delta$  30.3, 36.7, 37.7, 46.3, 114.9, 123.9, 124.2, 124.4, 124.8, 124.9, 125.0, 125.1, 125.3, 125.7, 126.5, 126.6, 127.4, 127.5, 130.4, 130.5, 131.2, 138.1, 142.2. IR ( $\text{CH}_2\text{Cl}_2$ )  $\nu$  3037, 2931, 2854, 1422, 1263, 845, 752, 665  $\text{cm}^{-1}$ . MS (%)  $m/z$  306 ( $\text{M}^+$ , 100.00), 289 (69.03), 278 (84.36), 239 (13.08), 215 (81.69), 202 (9.83), 145 (33.84), 138 (40.15), 117 (12.13). HRMS (EI) calcd. for  $\text{C}_{24}\text{H}_{18}$ : 306.1409, found: 306.1414.

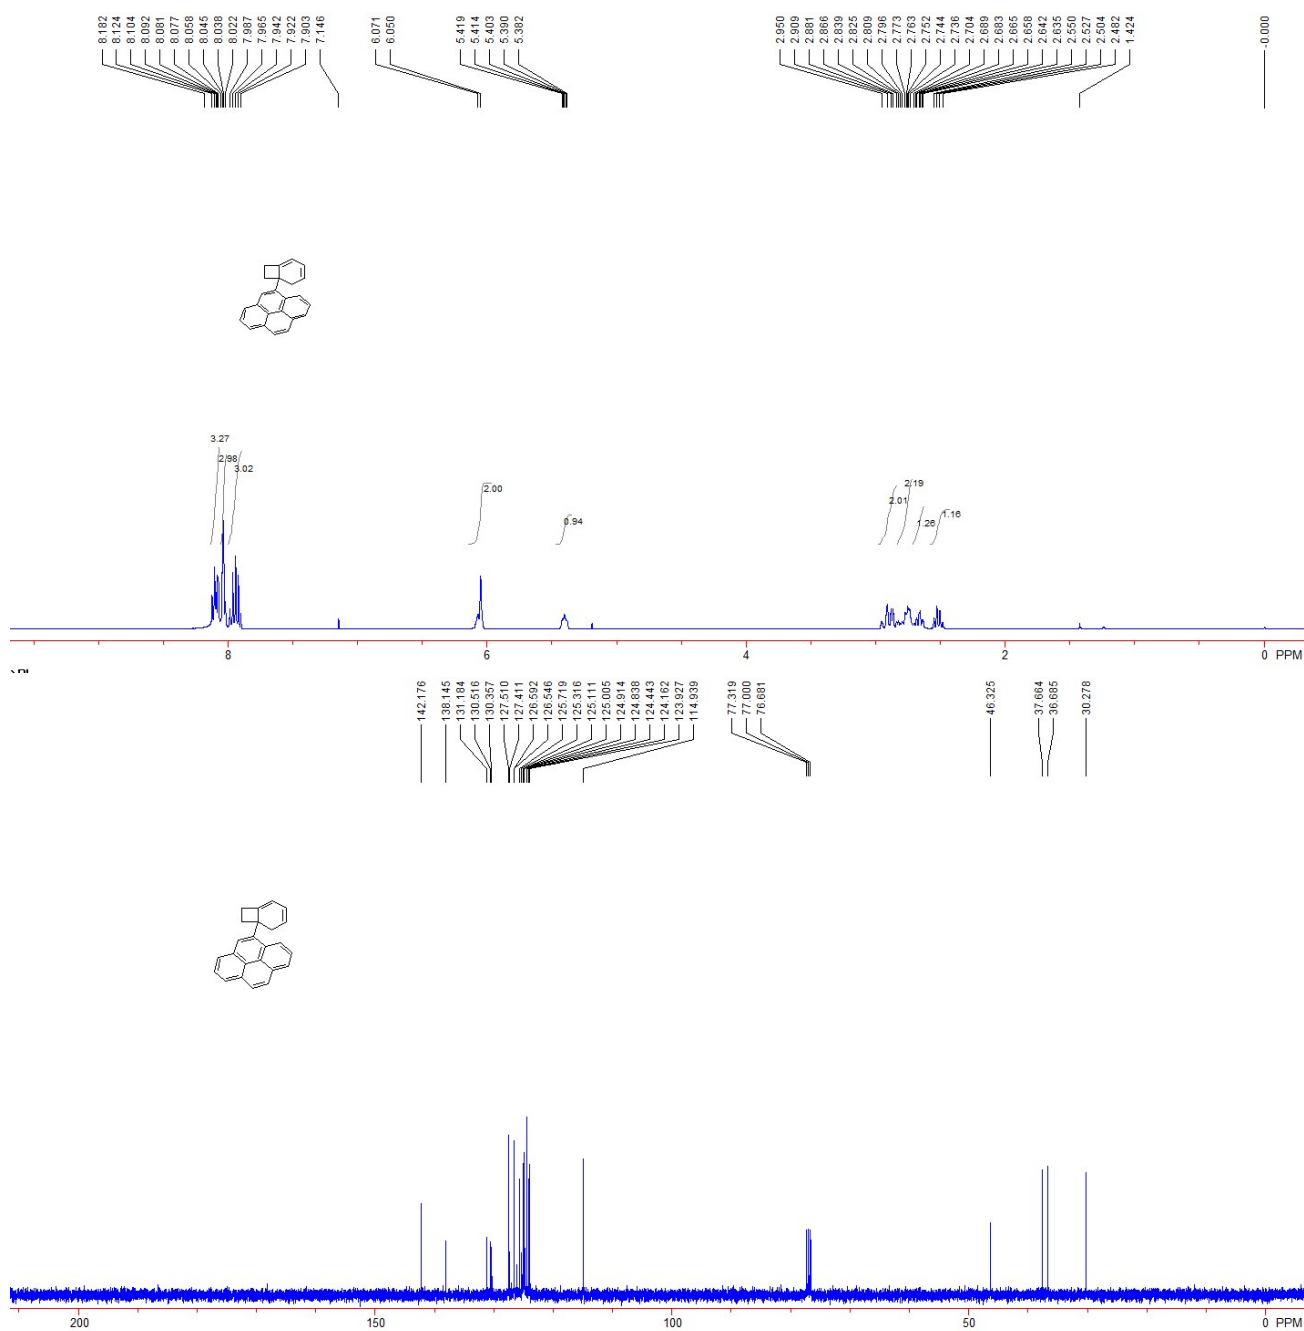

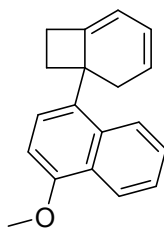

**1-(Bicyclo[4.2.0]octa-3,5-dien-1-yl)-4-methoxynaphthalene 6d:**

48 mg, yield = 92%. A white solid. Mp: 72-74 °C.  $^1\text{H}$  NMR (400 MHz,  $\text{CDCl}_3$ , TMS):  $\delta$  2.29-2.36 (m, 1H,  $\text{CH}_2$ ), 2.48-2.54 (m, 1H,  $\text{CH}_2$ ), 2.65-2.76 (m, 4H,  $\text{CH}_2$ ), 3.92 (s, 3H,  $\text{CH}_3$ ), 5.39-5.42 (m, 1H, =CH), 5.94-6.00 (m, 2H, =CH), 6.64-6.67 (m, 1H, Ar), 7.39-7.49 (m, 3H, Ar), 7.79-7.82 (m, 1H, Ar), 8.32-8.35 (m, 1H, Ar).  $^{13}\text{C}$  NMR (100 MHz,  $\text{CDCl}_3$ , TMS):  $\delta$  30.1, 35.5, 36.6, 45.4, 55.3, 102.6, 114.4, 123.3, 124.1, 124.3, 124.4, 124.7, 124.8, 125.6, 127.1, 130.2, 130.8, 142.2, 154.6. IR ( $\text{CH}_2\text{Cl}_2$ )  $\nu$  3035, 2934, 2838, 1586, 1460, 1234, 1086, 816, 764, 666  $\text{cm}^{-1}$ . MS (%)  $m/z$  262 ( $\text{M}^+$ , 90.56), 247 (25.91), 234 (100.00), 215 (47.10), 202 (33.07), 191 (36.47), 171 (66.66), 139 (20.59), 115 (23.22), 101 (24.25). HRMS (EI) calcd. for  $\text{C}_{19}\text{H}_{18}\text{O}$ : 262.1358, found: 262.1357.

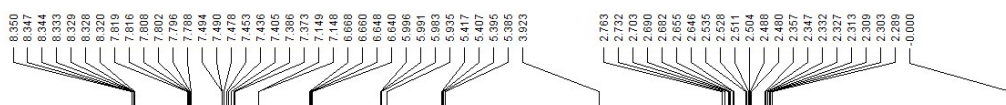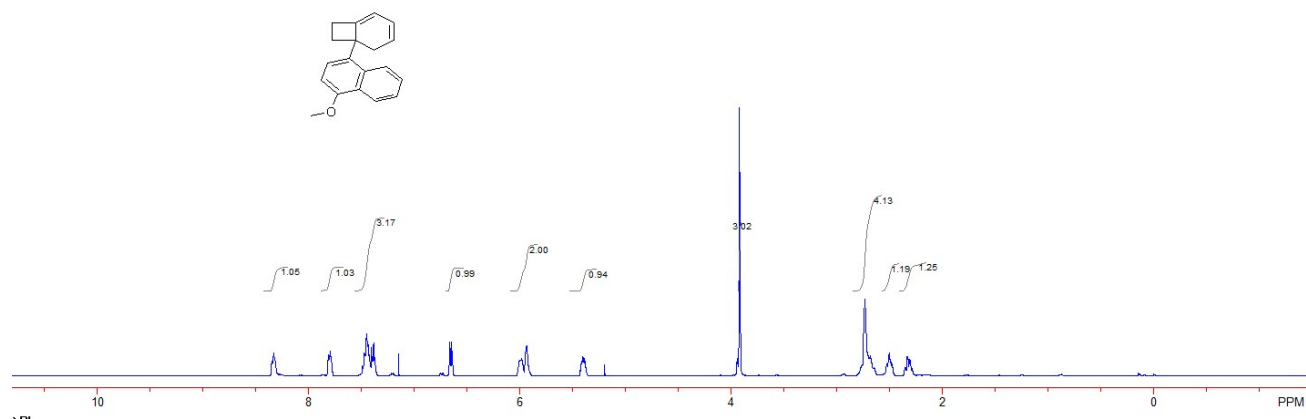

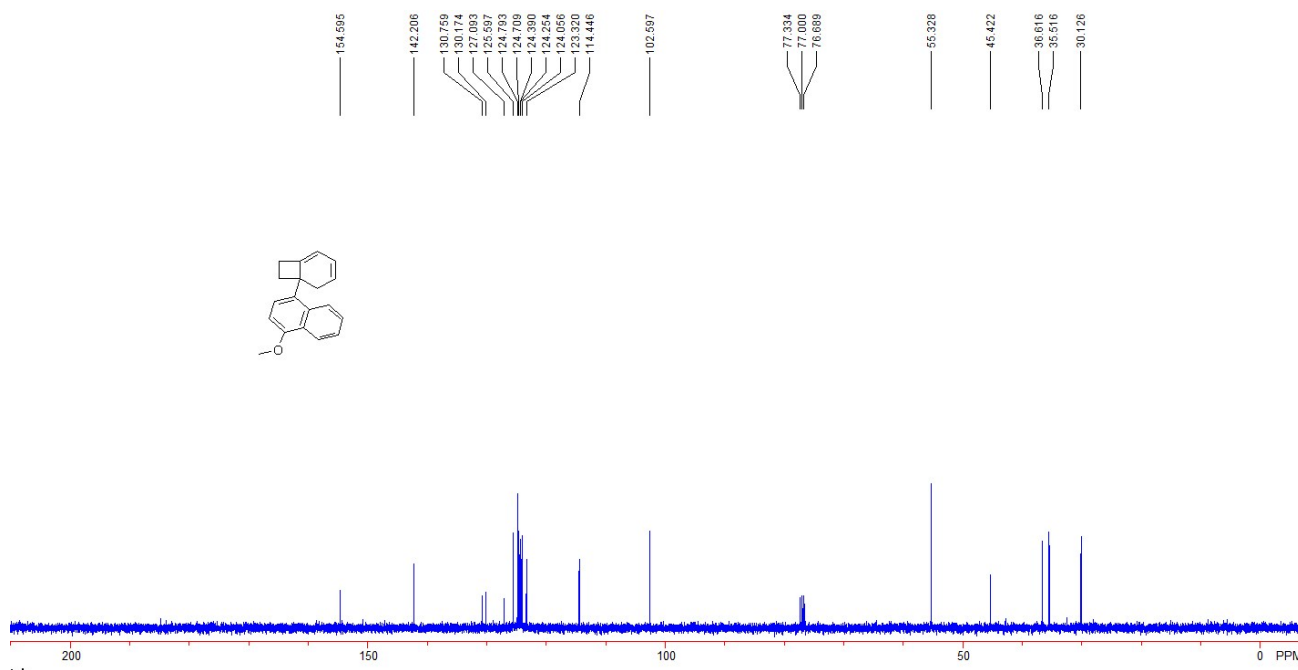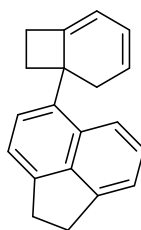

**5-(Bicyclo[4.2.0]octa-3,5-dien-1-yl)-1,2-dihydroacenaphthylene 6c:**

42 mg, yield = 81%. A white solid, mp = 85-87 °C. <sup>1</sup>H NMR (400 MHz, CDCl<sub>3</sub>, TMS): δ 2.29-2.35 (m, 1H, CH<sub>2</sub>), 2.50-2.55 (m, 1H, CH<sub>2</sub>), 2.67-2.80 (m, 4H, CH<sub>2</sub>), 3.32-3.38 (m, 4H, CH<sub>2</sub>), 5.38-5.43 (m, 1H, =CH), 5.93-5.95 (m, 1H, =CH), 5.99-6.02 (m, 1H, =CH), 7.15 (d, *J* = 6.8 Hz, 1H, Ar), 7.26 (d, *J* = 6.8 Hz, 1H, Ar), 7.40-7.44 (m, 2H, Ar), 7.56 (d, *J* = 8.4 Hz, 1H, Ar). <sup>13</sup>C NMR (100 MHz, CDCl<sub>3</sub>, TMS): δ 29.8, 30.2, 30.6, 35.1, 36.2, 45.6, 114.3, 118.5, 118.8, 120.4, 123.8, 124.8, 125.7, 126.9, 128.5, 134.6, 140.6, 142.4, 144.9, 147.2. IR (CH<sub>2</sub>Cl<sub>2</sub>) ν 3028, 2931, 2837, 1607, 1423, 1271, 837, 749, 718, 667 cm<sup>-1</sup>. MS (%) *m/z* 258 (M<sup>+</sup>, 99.23), 243 (44.16), 230 (100.00), 215 (25.79), 202 (20.12), 189 (13.09), 167 (56.15), 152 (30.49), 114 (15.94), 101 (14.19). HRMS (EI) calcd. for C<sub>20</sub>H<sub>18</sub>: 258.1409, found: 258.1410.

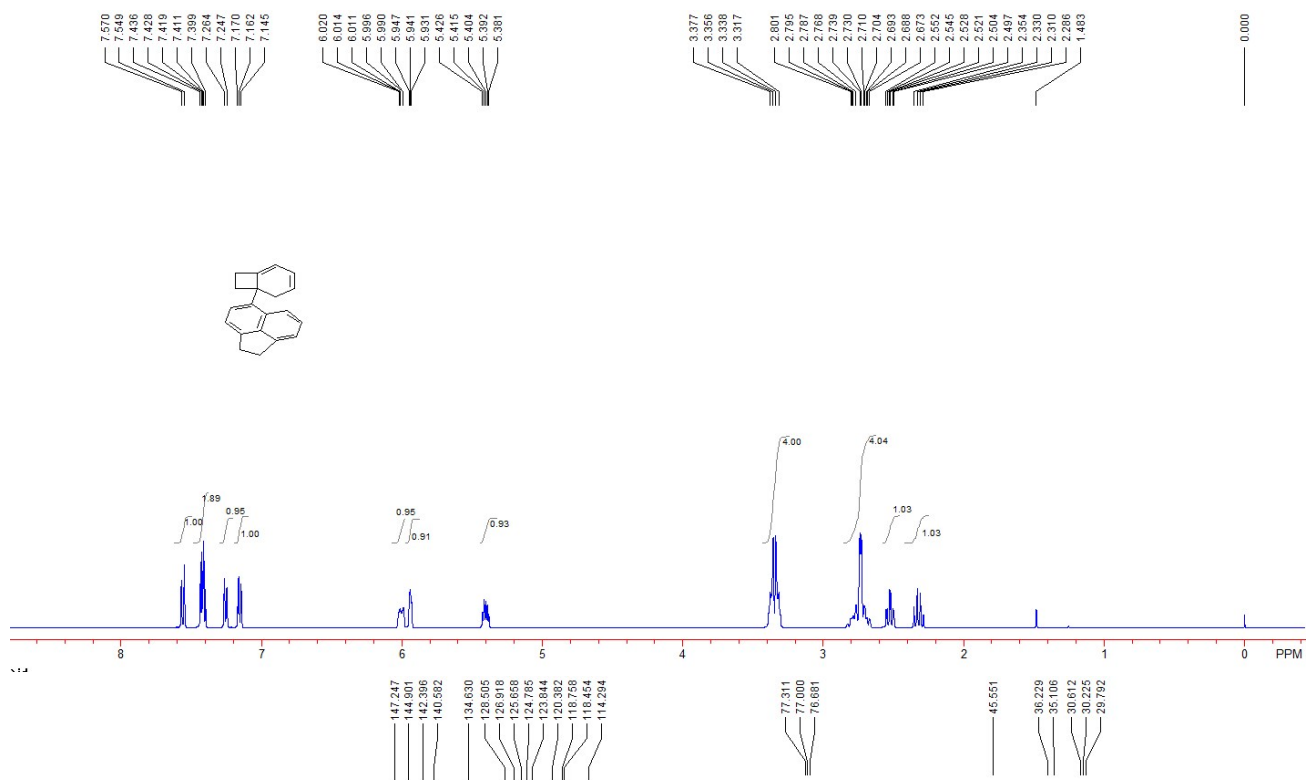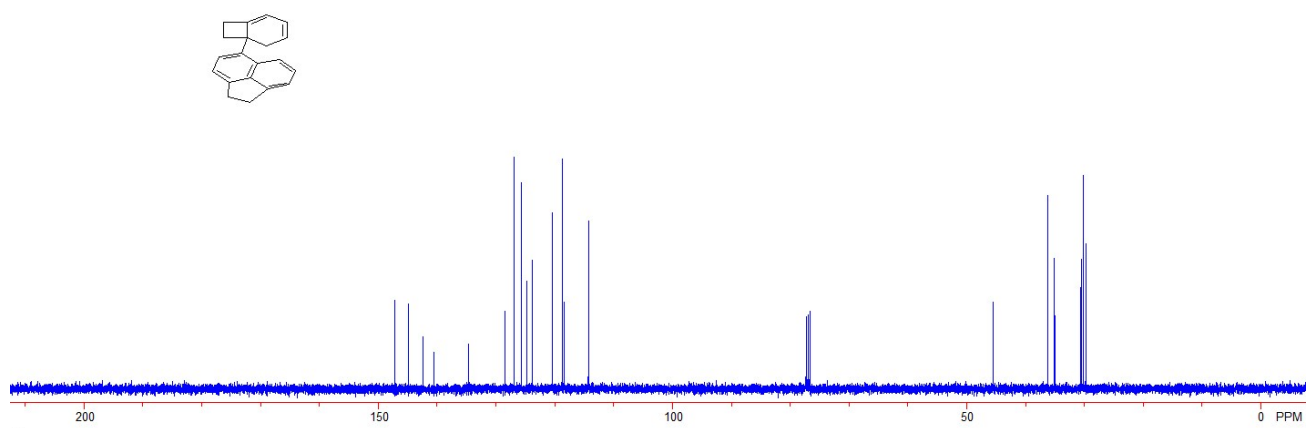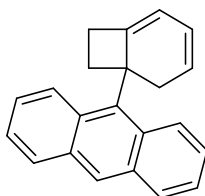

**9-(Bicyclo[4.2.0]octa-3,5-dien-1-yl)anthracene 6f:**

48 mg, yield = 84%. Colorless oil. <sup>1</sup>H NMR (400 MHz, CDCl<sub>3</sub>, TMS): δ 2.45-2.51 (m, 1H, CH<sub>2</sub>), 2.66-2.71 (m, 2H, CH<sub>2</sub>), 2.75-2.79 (m, 1H, CH<sub>2</sub>), 3.00-3.06 (m, 1H, CH<sub>2</sub>), 3.13-3.17 (m, 1H, CH<sub>2</sub>), 5.64-5.68 (m, 1H, =CH), 6.04 (br, 1H, =CH), 6.19 (t, *J* = 4.8 Hz, 1H, =CH), 7.27-7.35 (m, 2H, Ar),

7.38-7.45 (m, 2H, Ar), 7.87 (d,  $J = 8.0$  Hz, 2H, Ar), 7.93 (d,  $J = 8.8$  Hz, 1H, Ar), 7.97 (d,  $J = 7.6$  Hz, 1H, Ar), 8.29 (s, 1H, Ar), 9.33 (d,  $J = 8.8$  Hz, 1H, Ar).  $^{13}\text{C}$  NMR (100 MHz,  $\text{CDCl}_3$ , TMS):  $\delta$  32.3, 40.1, 43.3, 48.7, 114.0, 124.2, 124.3, 124.6, 124.8, 125.3, 125.4, 125.8, 126.9, 127.1, 128.5, 129.9, 131.3, 131.9, 132.4, 139.4, 144.2. IR ( $\text{CH}_2\text{Cl}_2$ )  $\nu$  3043, 2929, 2851, 1673, 1023, 906, 730, 675  $\text{cm}^{-1}$ . MS (%)  $m/z$  282 ( $\text{M}^+$ , 41.10), 167 (13.36), 254 (31.96), 239 (9.74), 215 (7.99), 191 (100.00), 178 (6.42), 126 (19.62), 113 (8.15). HRMS (EI) calcd. for  $\text{C}_{22}\text{H}_{18}$ : 282.1409, found: 282.1410.

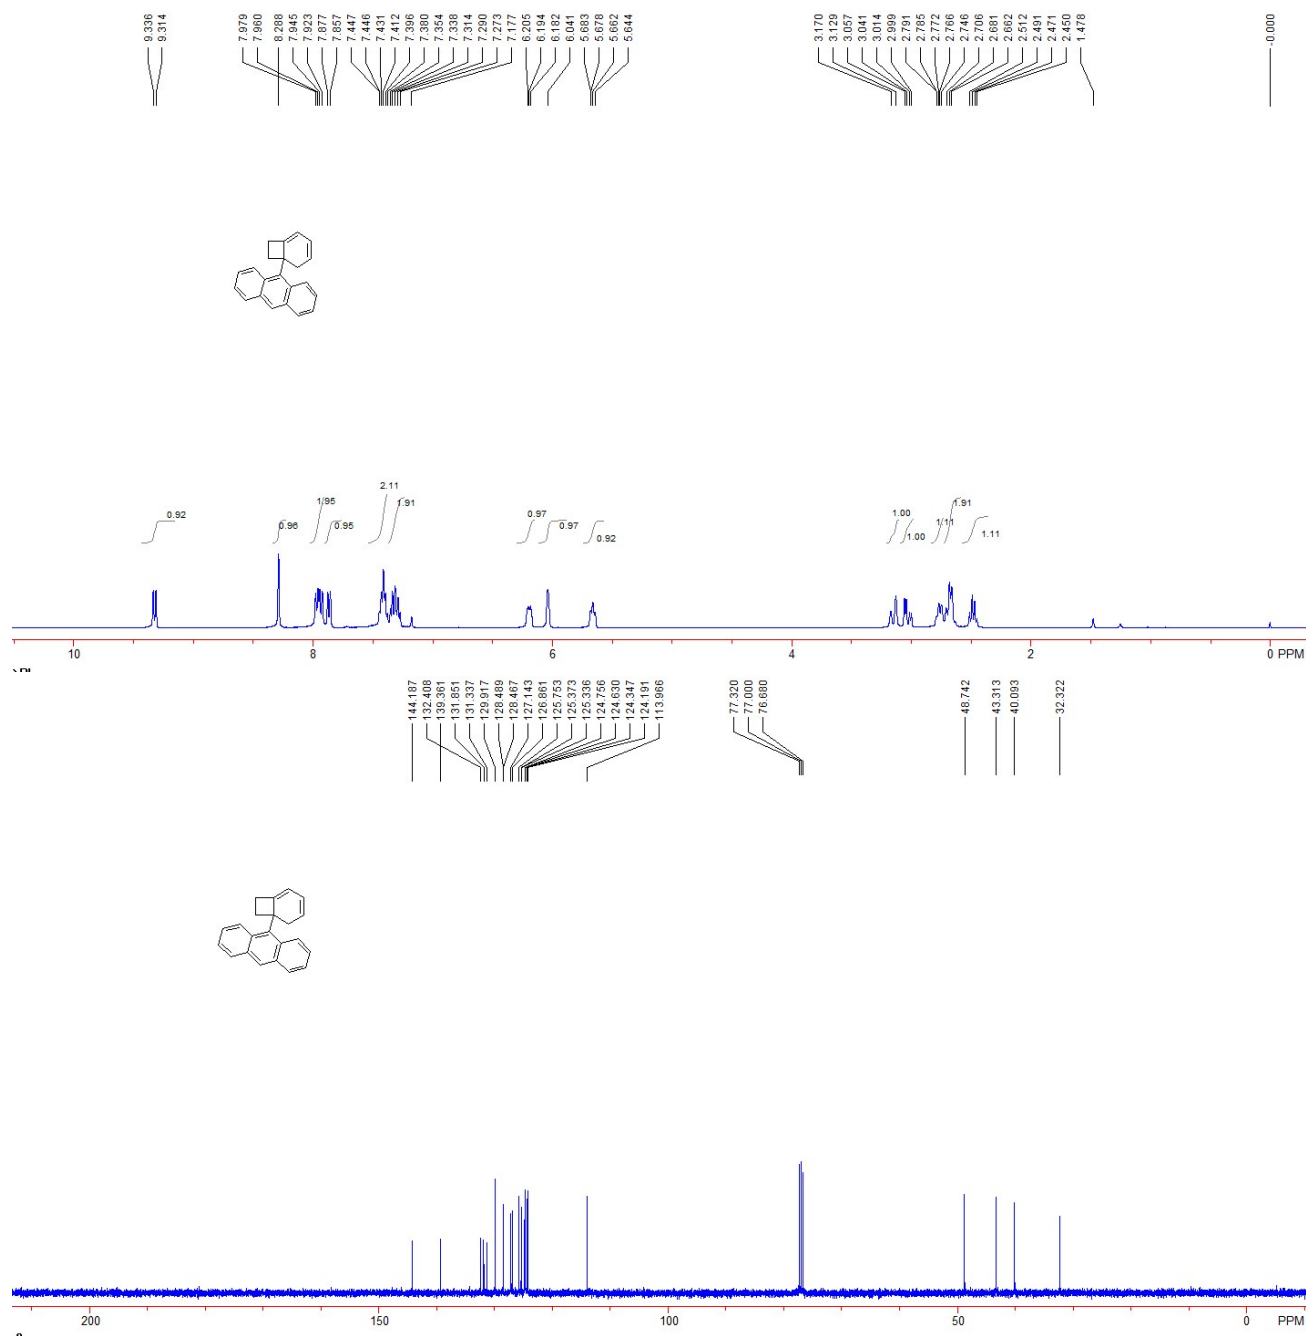

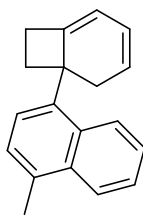

**1-(Bicyclo[4.2.0]octa-3,5-dien-1-yl)-4-methylnaphthalene 6g:**

45 mg, yield = 86%. Yellowish oil.  $^1\text{H}$  NMR (400 MHz,  $\text{CDCl}_3$ , TMS):  $\delta$  2.34-2.41 (m, 1H,  $\text{CH}_2$ ), 2.51-2.57 (m, 1H,  $\text{CH}_2$ ), 2.66-2.69 (m, 2H,  $\text{CH}_2$ ), 2.67 (s, 3H,  $\text{CH}_3$ ), 2.72-2.78 (m, 2H,  $\text{CH}_2$ ), 5.38-5.42 (m, 1H,  $=\text{CH}$ ), 5.96-6.02 (m, 2H,  $=\text{CH}$ ), 7.18-7.21 (m, 1H, Ar), 7.39-7.41 (m, 1H, Ar), 7.46-7.52 (m, 2H, Ar), 7.88-7.90 (m, 1H, Ar), 8.03-8.06 (m, 1H, Ar).  $^{13}\text{C}$  NMR (100 MHz,  $\text{CDCl}_3$ , TMS):  $\delta$  19.5, 30.2, 35.8, 36.8, 45.8, 114.6, 124.0, 124.2, 124.72, 124.73, 124.9, 125.57, 125.61, 125.9, 130.0, 133.3, 134.1, 136.8, 142.1. IR ( $\text{CH}_2\text{Cl}_2$ )  $\nu$  3033, 2933, 2857, 1673, 1596, 1514, 905, 727  $\text{cm}^{-1}$ . MS (%)  $m/z$  246 ( $\text{M}^+$ , 41.63), 231 (85.76), 218 (100.00), 203 (43.45), 189 (13.94), 155 (48.11), 115 (19.36), 108 (21.49), 94 (7.49). HRMS (EI) calcd. for  $\text{C}_{19}\text{H}_{18}$ : 246.1409, found: 246.1403.

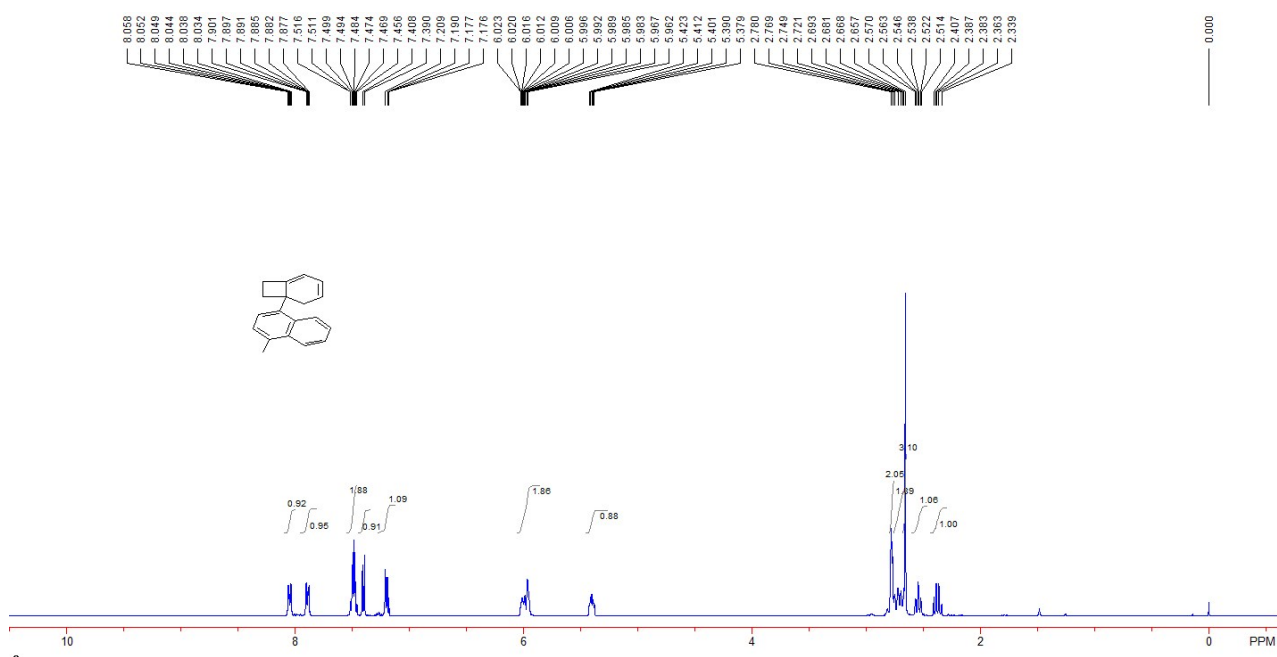

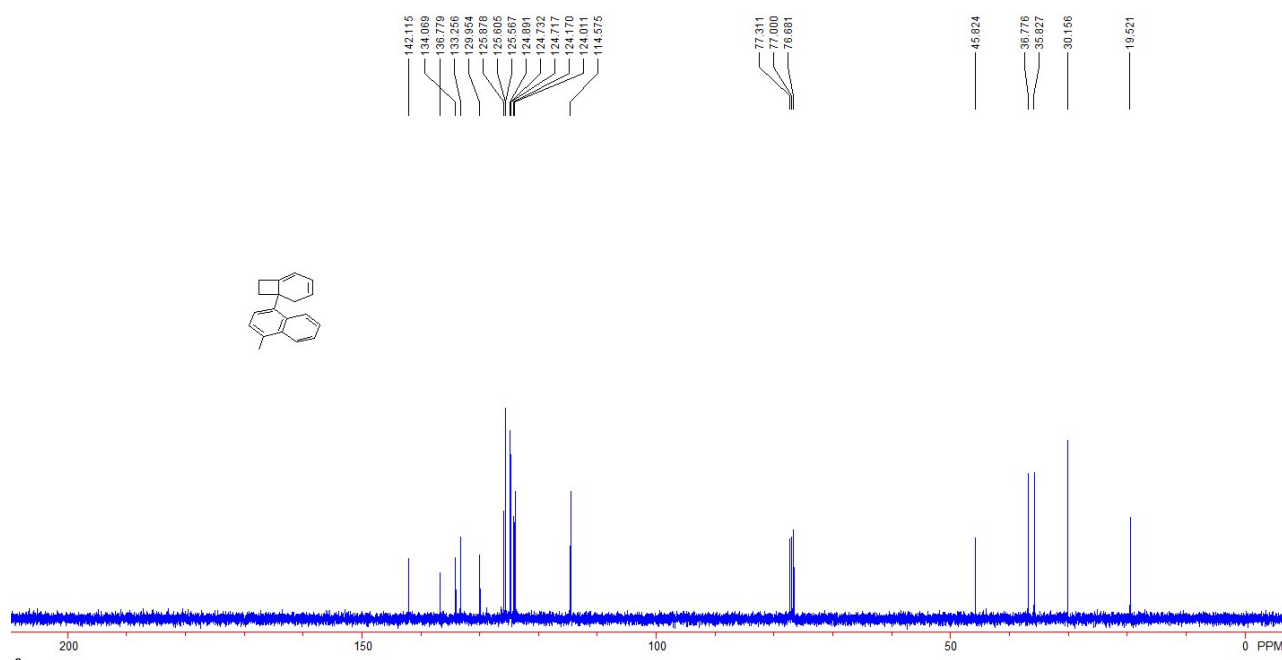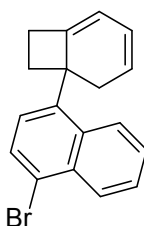

**1-(Bicyclo[4.2.0]octa-3,5-dien-1-yl)-4-bromonaphthalene 6h:**

56 mg, yield = 90%. Colorless oil. <sup>1</sup>H NMR (400 MHz, CDCl<sub>3</sub>, TMS): δ 2.37-2.43 (m, 1H, CH<sub>2</sub>), 2.49-2.55 (m, 1H, CH<sub>2</sub>), 2.69-2.83 (m, 4H, CH<sub>2</sub>), 5.37-5.42 (m, 1H, =CH), 5.98-6.03 (m, 2H, =CH), 7.34 (d, *J* = 7.6 Hz, 1H, Ar), 7.50-7.58 (m, 2H, Ar), 7.66 (d, *J* = 7.6 Hz, 1H, Ar), 7.86-7.88 (m, 1H, Ar), 8.31-8.33 (m, 1H, Ar). <sup>13</sup>C NMR (100 MHz, CDCl<sub>3</sub>, TMS): δ 30.2, 35.8, 36.7, 45.8, 115.1, 121.9, 124.0, 124.8, 125.2, 125.5, 125.9, 126.5, 128.7, 129.3, 131.4, 133.2, 139.1, 141.6. IR (CH<sub>2</sub>Cl<sub>2</sub>) ν 3077, 2934, 2857, 1673, 1372, 906, 758, 730, 671 cm<sup>-1</sup>. MS (%) *m/z* 310 (M<sup>+</sup>, 22.04), 282 (63.86), 231 (97.14), 215 (100.00), 202 (85.77), 189 (15.73), 152 (22.52), 108 (32.77), 101 (31.00), 77 (9.59). HRMS (EI) calcd. for C<sub>18</sub>H<sub>15</sub>Br: 310.0357, found: 310.0351.

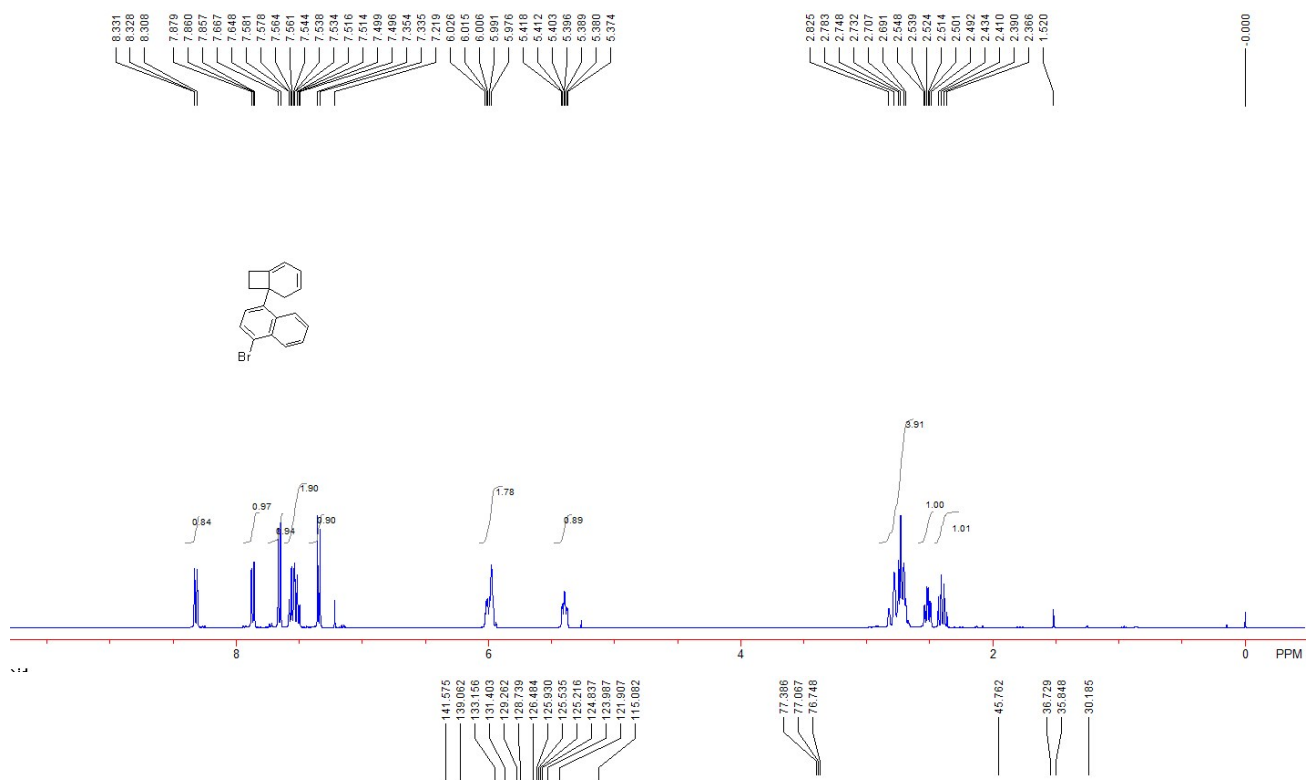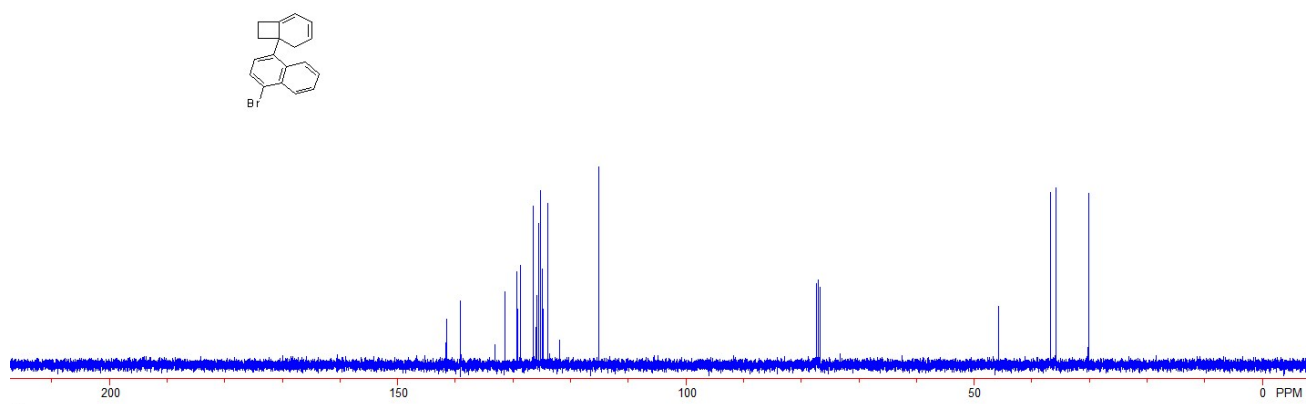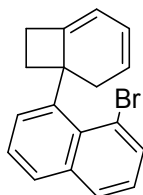

**1-(Bicyclo[4.2.0]octa-3,5-dien-1-yl)-8-bromonaphthalene 6i:**

40 mg, yield = 64%. Colorless oil. <sup>1</sup>H NMR (400 MHz, CDCl<sub>3</sub>, TMS): δ 2.40-2.52 (m, 3H, CH<sub>2</sub>), 2.82-2.92 (m, 2H, CH<sub>2</sub>), 3.16-3.22 (m, 1H, CH<sub>2</sub>), 5.43-5.47 (m, 1H, =CH), 5.94 (d, *J* = 4.0 Hz, 1H, =CH), 6.03-6.07 (m, 1H, =CH), 7.21 (dd, *J*<sub>1</sub> = 8.4 Hz, *J*<sub>2</sub> = 7.2 Hz, 1H, Ar), 7.35 (dd, *J*<sub>1</sub> = 8.0 Hz, *J*<sub>2</sub>

= 7.2 Hz, 1H, Ar), 7.73-7.76 (m, 2H, Ar), 7.81-7.83 (m, 1H, Ar), 7.91 (dd,  $J_1 = 7.2$  Hz,  $J_2 = 1.2$  Hz, 1H, Ar).  $^{13}\text{C}$  NMR (100 MHz,  $\text{CDCl}_3$ , TMS):  $\delta$  28.8, 39.5, 40.3, 46.6, 114.5, 117.7, 124.0, 124.7, 125.1, 125.5, 128.5, 129.3, 130.2, 130.6, 134.4, 137.6, 137.9, 143.3. IR ( $\text{CH}_2\text{Cl}_2$ )  $\nu$  3033, 2952, 2854, 1560, 1422, 1192, 816, 762, 724  $\text{cm}^{-1}$ . MS (%)  $m/z$  310 ( $\text{M}^+$ , 4.45), 282 (24.37), 231 (12.41), 215 (38.51), 203 (100.00), 152 (7.54), 113 (7.76), 101 (23.27). HRMS (EI) calcd. for  $\text{C}_{18}\text{H}_{15}\text{Br}$ : 310.0357, found: 310.0353.

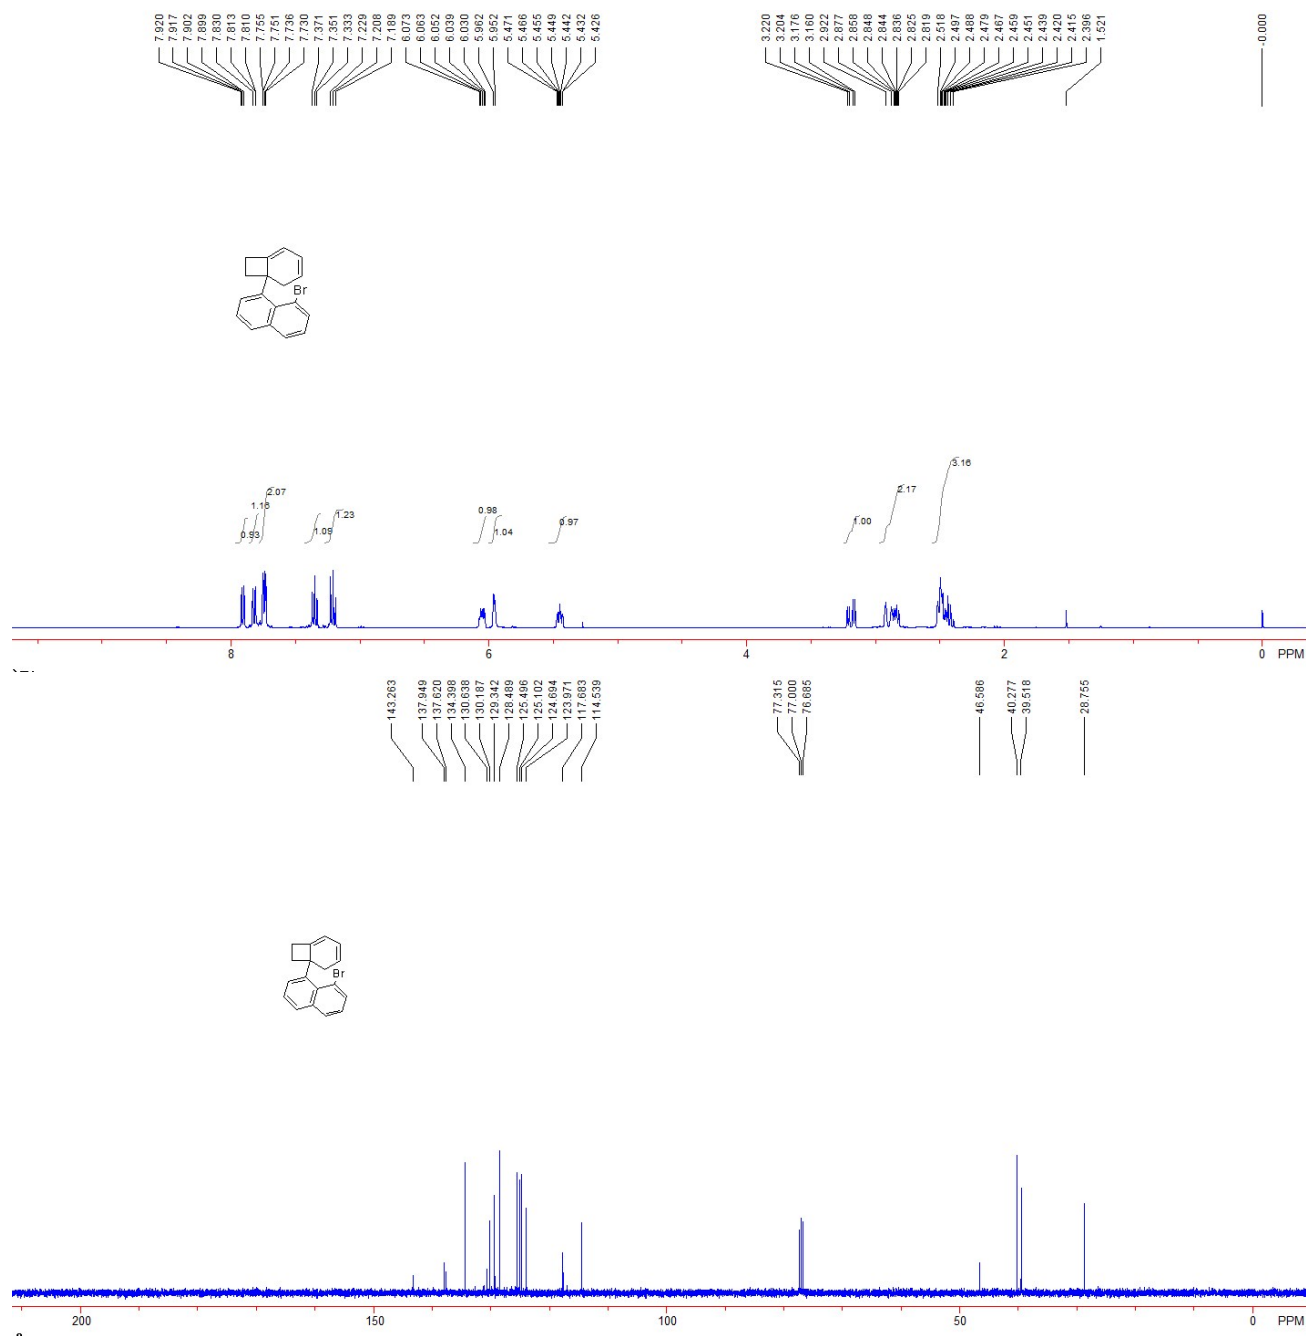

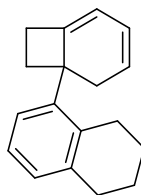

**5-(Bicyclo[4.2.0]octa-3,5-dien-1-yl)-1,2,3,4-tetrahydronaphthalene 6j:**

35 mg, yield = 75%. Colorless oil.  $^1\text{H}$  NMR (400 MHz,  $\text{CDCl}_3$ , TMS):  $\delta$  1.51-1.82 (m, 4H,  $\text{CH}_2$ ), 2.09-2.16 (m, 1H,  $\text{CH}_2$ ), 2.30-2.36 (m, 1H,  $\text{CH}_2$ ), 2.55-2.72 (m, 5H,  $\text{CH}_2$ ), 2.79-2.82 (m, 2H,  $\text{CH}_2$ ), 5.42 (t,  $J = 6.8$  Hz, 1H =CH), 5.89 (br, 1H, =CH), 5.98-6.01 (m, 1H, =CH), 6.97-7.03 (m, 2H, Ar), 7.15 (d,  $J = 7.2$  Hz, 1H, Ar).  $^{13}\text{C}$  NMR (100 MHz,  $\text{CDCl}_3$ , TMS):  $\delta$  22.76, 22.80, 27.2, 29.4, 29.7, 34.9, 35.7, 45.9, 114.3, 123.5, 124.6, 124.8, 125.0, 127.7, 135.9, 138.6, 140.5, 142.4. IR ( $\text{CH}_2\text{Cl}_2$ )  $\nu$  3035, 2929, 2855, 1674, 1583, 1461, 776, 750, 664  $\text{cm}^{-1}$ . MS (%)  $m/z$  236 ( $\text{M}^+$ , 84.89), 208 (100.00), 193 (56.10), 179 (63.09), 165 (55.72), 145 (20.82), 128 (23.64), 115 (28.80), 103 (9.95), 89 (23.91). HRMS (EI) calcd. for  $\text{C}_{18}\text{H}_{20}$ : 236.1565, found: 236.1562.

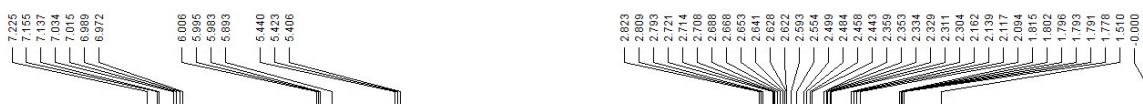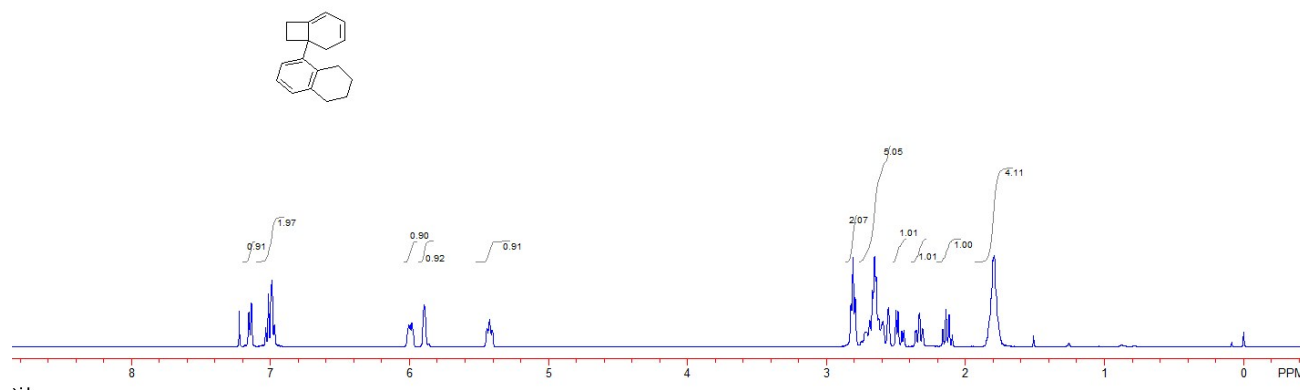

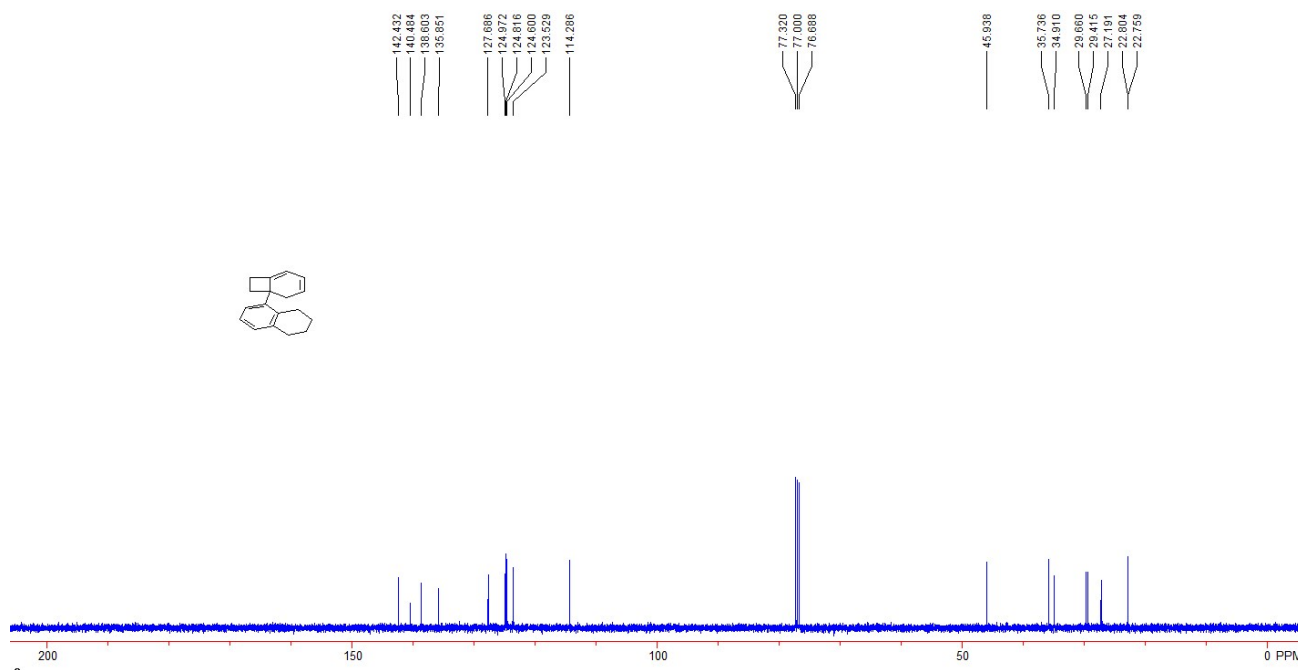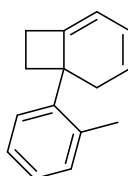

**6-(o-Tolyl)bicyclo[4.2.0]octa-1,3-diene 6k:**

34 mg, yield = 85%. Colorless oil.  $^1\text{H}$  NMR (400 MHz,  $\text{CDCl}_3$ , TMS):  $\delta$  2.12-2.19 (m, 1H,  $\text{CH}_2$ ), 2.30-2.39 (m, 1H,  $\text{CH}_2$ ), 2.36 (s, 3H,  $\text{CH}_3$ ), 2.43-2.49 (m, 1H,  $\text{CH}_2$ ), 2.58-2.73 (m, 3H,  $\text{CH}_2$ ), 5.40-5.45 (m, 1H, =CH), 5.91 (br, 1H, =CH), 5.99-6.03 (m, 1H, =CH), 7.08 (dd,  $J_1 = 7.6$  Hz,  $J_2 = 5.6$  Hz, 1H, Ar), 7.13-7.20 (m, 2H, Ar), 7.28 (dd,  $J_1 = 6.4$  Hz,  $J_2 = 1.2$  Hz, 1H, Ar).  $^{13}\text{C}$  NMR (100 MHz,  $\text{CDCl}_3$ , TMS):  $\delta$  19.6, 29.4, 34.8, 35.7, 45.9, 114.4, 123.4, 125.0, 125.1, 126.5, 127.2, 131.6, 135.8, 141.3, 142.1. IR ( $\text{CH}_2\text{Cl}_2$ )  $\nu$  3058, 3016, 2925, 1674, 1484, 1449, 1046, 757, 730  $\text{cm}^{-1}$ . MS (%)  $m/z$  196 ( $\text{M}^+$ , 27.72), 181 (100.00), 168 (82.54), 153 (35.98), 128 (17.67), 115 (33.17), 105 (27.98), 89 (28.86), 73 (44.02). HRMS (EI) calcd. for  $\text{C}_{15}\text{H}_{16}$ : 196.1252, found: 196.1246.

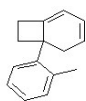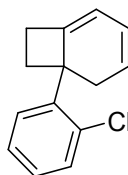

TMS):  $\delta$  29.3, 34.4, 34.8, 45.9, 115.0, 123.9, 124.9, 126.2, 127.8, 129.0, 130.7, 133.7, 140.3, 141.1.  
 IR (CH<sub>2</sub>Cl<sub>2</sub>)  $\nu$  3036, 2951, 2817, 1467, 1423, 1030, 830, 748, 668 cm<sup>-1</sup>. MS (%)  $m/z$  216 (M<sup>+</sup>, 2.11),  
 201 (10.96), 188 (100.00), 181 (33.70), 165 (50.76), 152 (34.68), 115 (7.55), 89 (15.49), 76 (12.02).  
 HRMS (EI) calcd. for C<sub>14</sub>H<sub>13</sub>Cl: 216.0706, found: 216.0708.

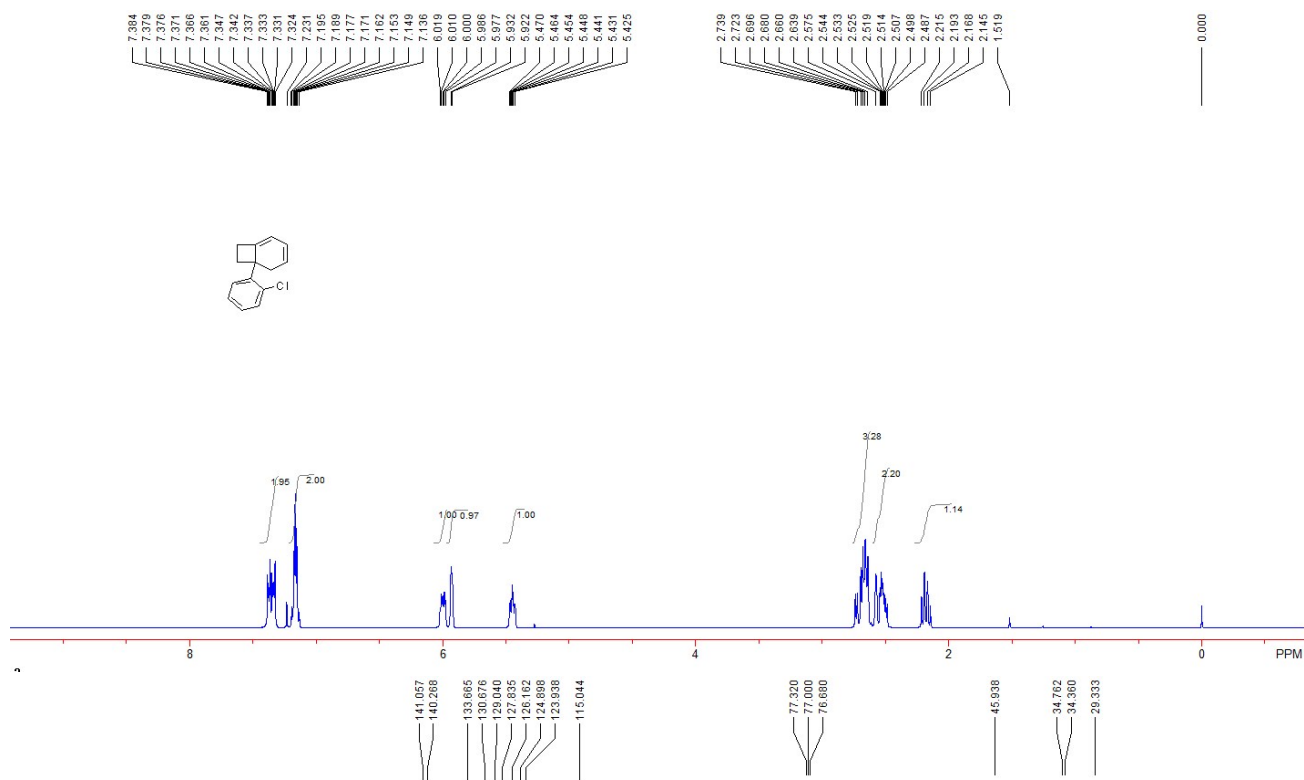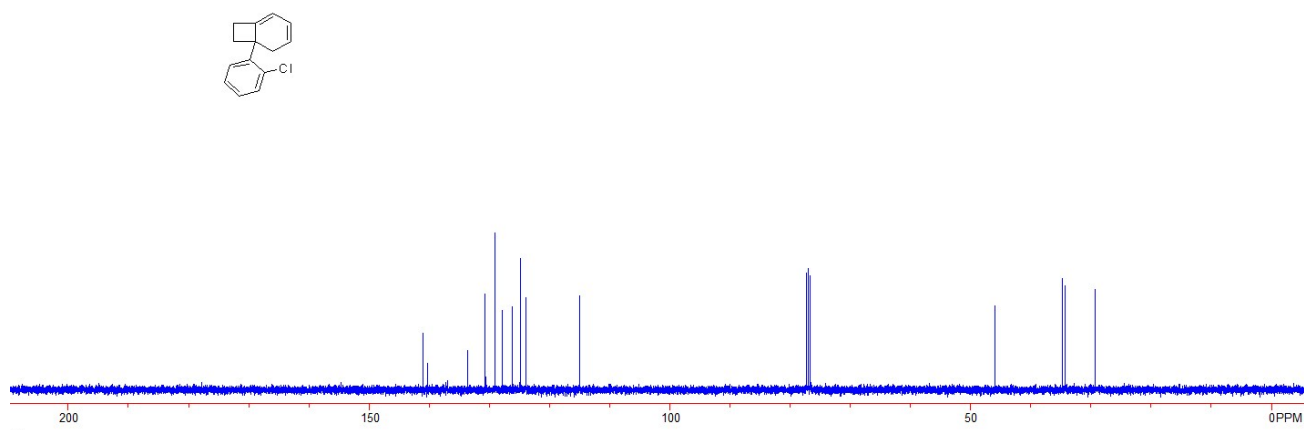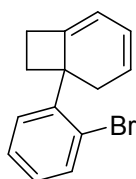

**6-(2-bromophenyl)bicyclo[4.2.0]octa-1,3-diene 6m:**

45 mg, yield = 87%. Colorless oil.  $^1\text{H}$  NMR (400 MHz,  $\text{CDCl}_3$ , TMS):  $\delta$  2.15-2.21 (m, 1H,  $\text{CH}_2$ ), 2.54-2.57 (m, 2H,  $\text{CH}_2$ ), 2.58-2.67 (m, 2H,  $\text{CH}_2$ ), 2.75-2.80 (m, 2H,  $\text{CH}_2$ ), 5.42-5.45 (m, 1H,  $=\text{CH}$ ), 5.93 (br, 1H,  $=\text{CH}$ ), 5.99-6.02 (m, 1H,  $=\text{CH}$ ), 7.06-7.09 (m, 1H, Ar), 7.10-7.19 (m, 1H, Ar), 7.20-7.23 (m, 1H, Ar), 7.35 (dd,  $J_1 = 7.6$  Hz,  $J_2 = 1.2$  Hz, 1H, Ar), 7.58 (d,  $J = 7.6$  Hz, 1H, Ar).  $^{13}\text{C}$  NMR (100 MHz,  $\text{CDCl}_3$ , TMS):  $\delta$  29.4, 34.7, 35.0, 47.1, 115.1, 123.4, 124.0, 124.9, 126.8, 128.1, 129.4, 134.2, 141.1, 141.5. IR ( $\text{CH}_2\text{Cl}_2$ )  $\nu$  3035, 2949, 2815, 1462, 1422, 1019, 746, 663  $\text{cm}^{-1}$ . MS (%)  $m/z$  262 ( $\text{M}^+$ , 1.31), 245 (7.49), 232 (100.00), 181 (48.46), 165 (91.15), 152 (71.61), 89 (31.44), 76 (27.98), 51 (15.40). HRMS (EI) calcd. for  $\text{C}_{14}\text{H}_{13}\text{Br}$ : 260.0201, found: 260.0195.

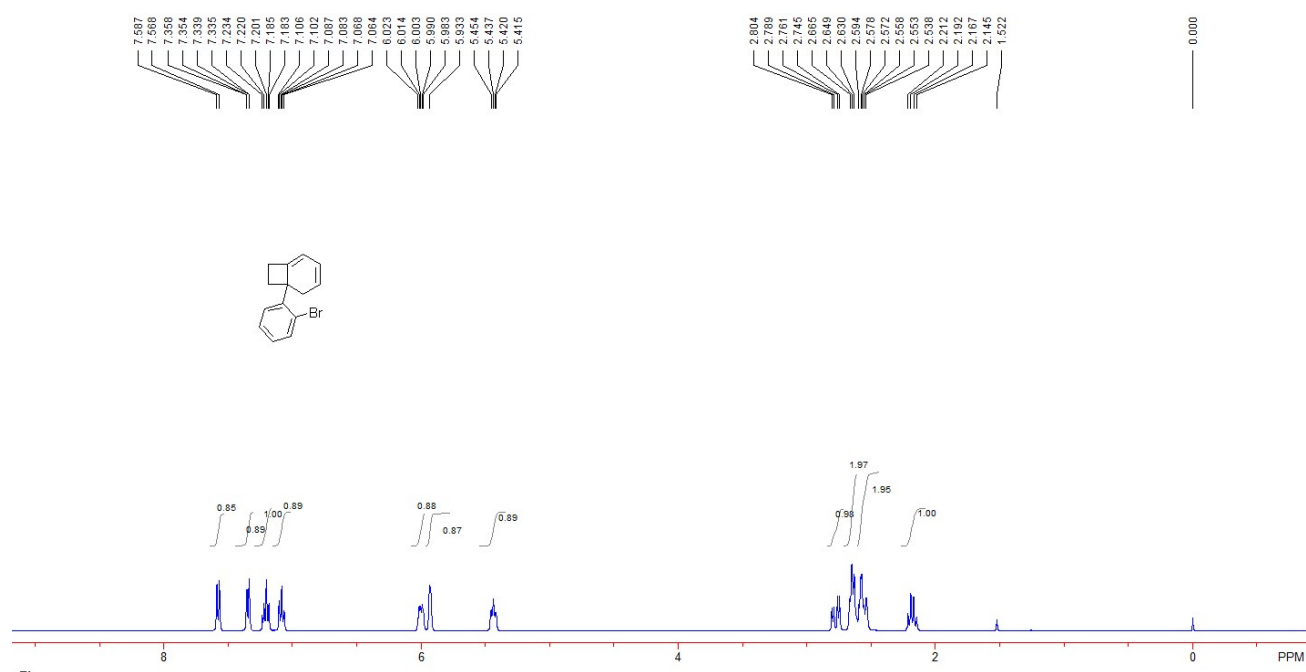

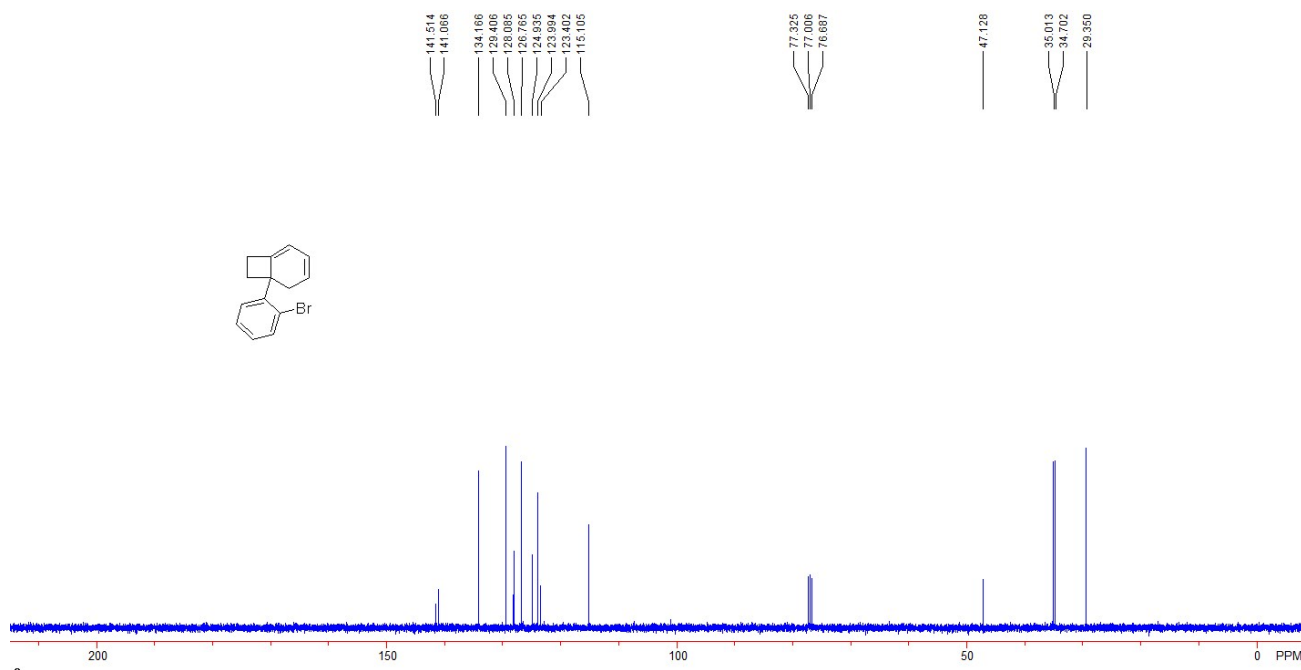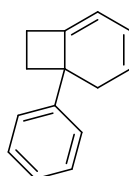

**6-phenylbicyclo[4.2.0]octa-1,3-diene 6m’:**

24 mg, yield = 86%. This is a known compound.<sup>[6]</sup> <sup>1</sup>H NMR (400 MHz, CDCl<sub>3</sub>, TMS): δ 2.11-2.18 (m, 1H, CH<sub>2</sub>), 2.29-2.39 (m, 2H, CH<sub>2</sub>), 2.61-2.70 (m, 2H, CH<sub>2</sub>), 2.74-2.80 (m, 1H, CH<sub>2</sub>), 5.44 (dd, *J*<sub>1</sub> = 7.6 Hz, *J*<sub>2</sub> = 7.6 Hz, 1H, =CH), 5.87 (br, 1H, =CH), 6.01 (dd, *J*<sub>1</sub> = 9.6 Hz, *J*<sub>2</sub> = 4.8 Hz, 1H, =CH), 7.18-7.20 (m, 1H, Ar), 7.21-7.35 (m, 4H, Ar). <sup>13</sup>C NMR (100 MHz, CDCl<sub>3</sub>, TMS): δ 30.0, 35.8, 37.8, 46.3, 113.9, 122.8, 125.2, 126.1, 126.9, 128.2, 142.9, 145.2.

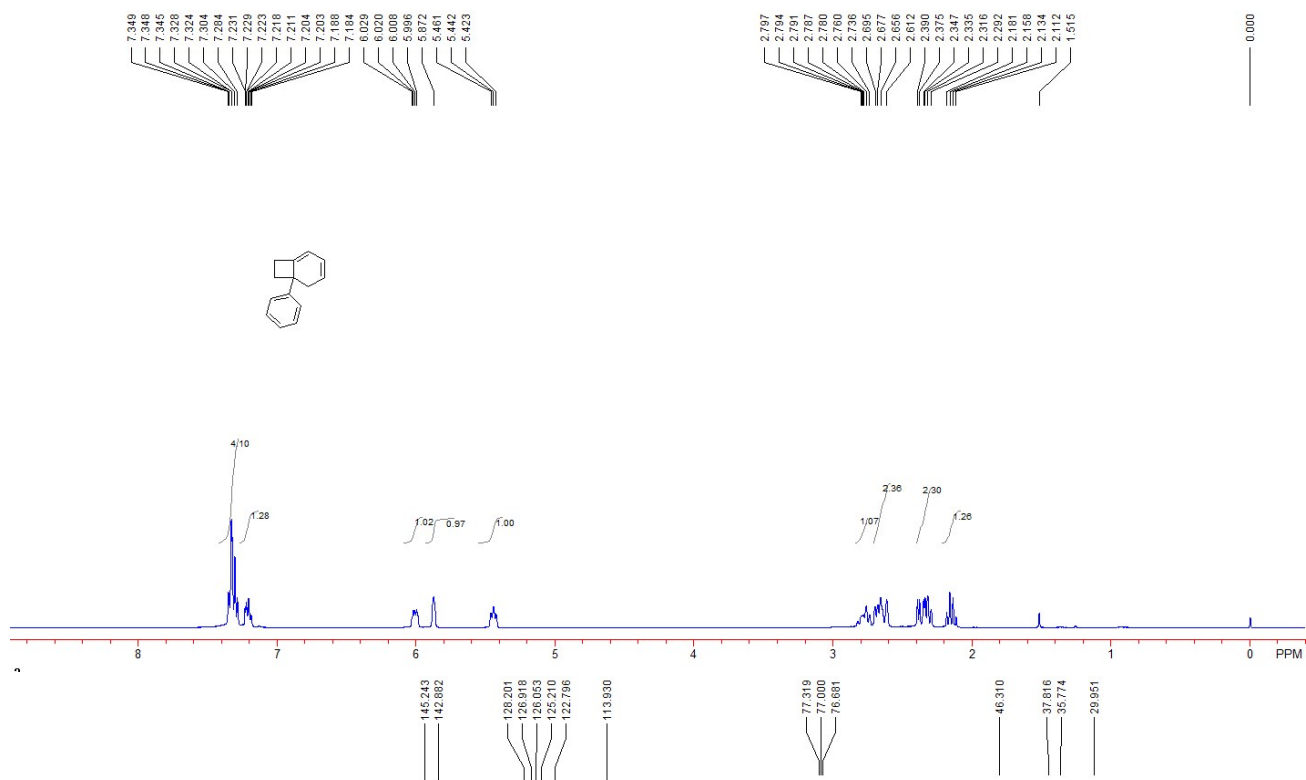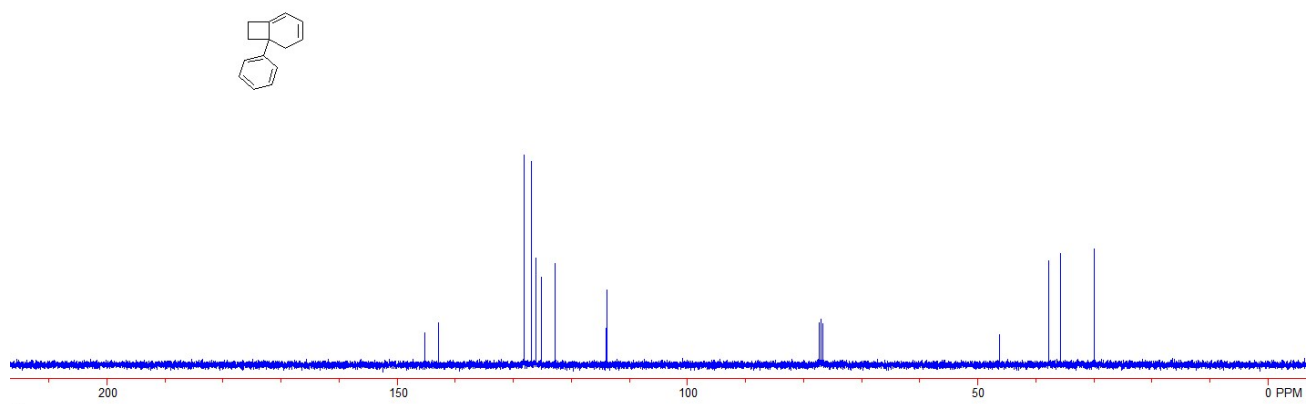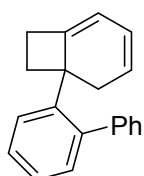

**6-(2-Bromophenyl)bicyclo[4.2.0]octa-1,3-diene 6n:**

43 mg, yield = 83%. Colorless oil. <sup>1</sup>H NMR (400 MHz, CDCl<sub>3</sub>, TMS): δ 1.65-1.72 (m, 1H, CH<sub>2</sub>), 2.15-2.20 (m, 1H, CH<sub>2</sub>), 2.35-2.40 (m, 1H, CH<sub>2</sub>), 2.49-2.58 (m, 2H, CH<sub>2</sub>), 2.61-2.68 (m, 1H, CH<sub>2</sub>), 5.43-5.48 (m, 1H, =CH), 5.84 (br, 1H, =CH), 5.99-6.03 (m, 1H, =CH), 7.18-7.22 (m, 1H, Ar), 7.25-

7.28 (m, 2H, Ar), 7.32-7.37 (m, 5H, Ar), 7.46-7.48 (m, 1H, Ar).  $^{13}\text{C}$  NMR (100 MHz,  $\text{CDCl}_3$ , TMS):  $\delta$  30.0, 35.5, 37.9, 46.1, 114.1, 123.6, 125.1, 126.3, 126.7, 126.9, 127.8, 128.3, 129.5, 132.3, 141.0, 141.5, 143.1, 143.3. IR ( $\text{CH}_2\text{Cl}_2$ )  $\nu$  3034, 1474, 1433, 1033, 1009, 745, 700, 672  $\text{cm}^{-1}$ . MS (%)  $m/z$  262 ( $\text{M}^+$ , 1.31), 245 (7.49), 232 (100.00), 181 (48.46), 165 (91.15), 152 (71.61), 89 (31.44), 76 (27.98), 51 (15.40). HRMS (EI) calcd. for  $\text{C}_{20}\text{H}_{18}$ : 258.1409, found: 258.1407.

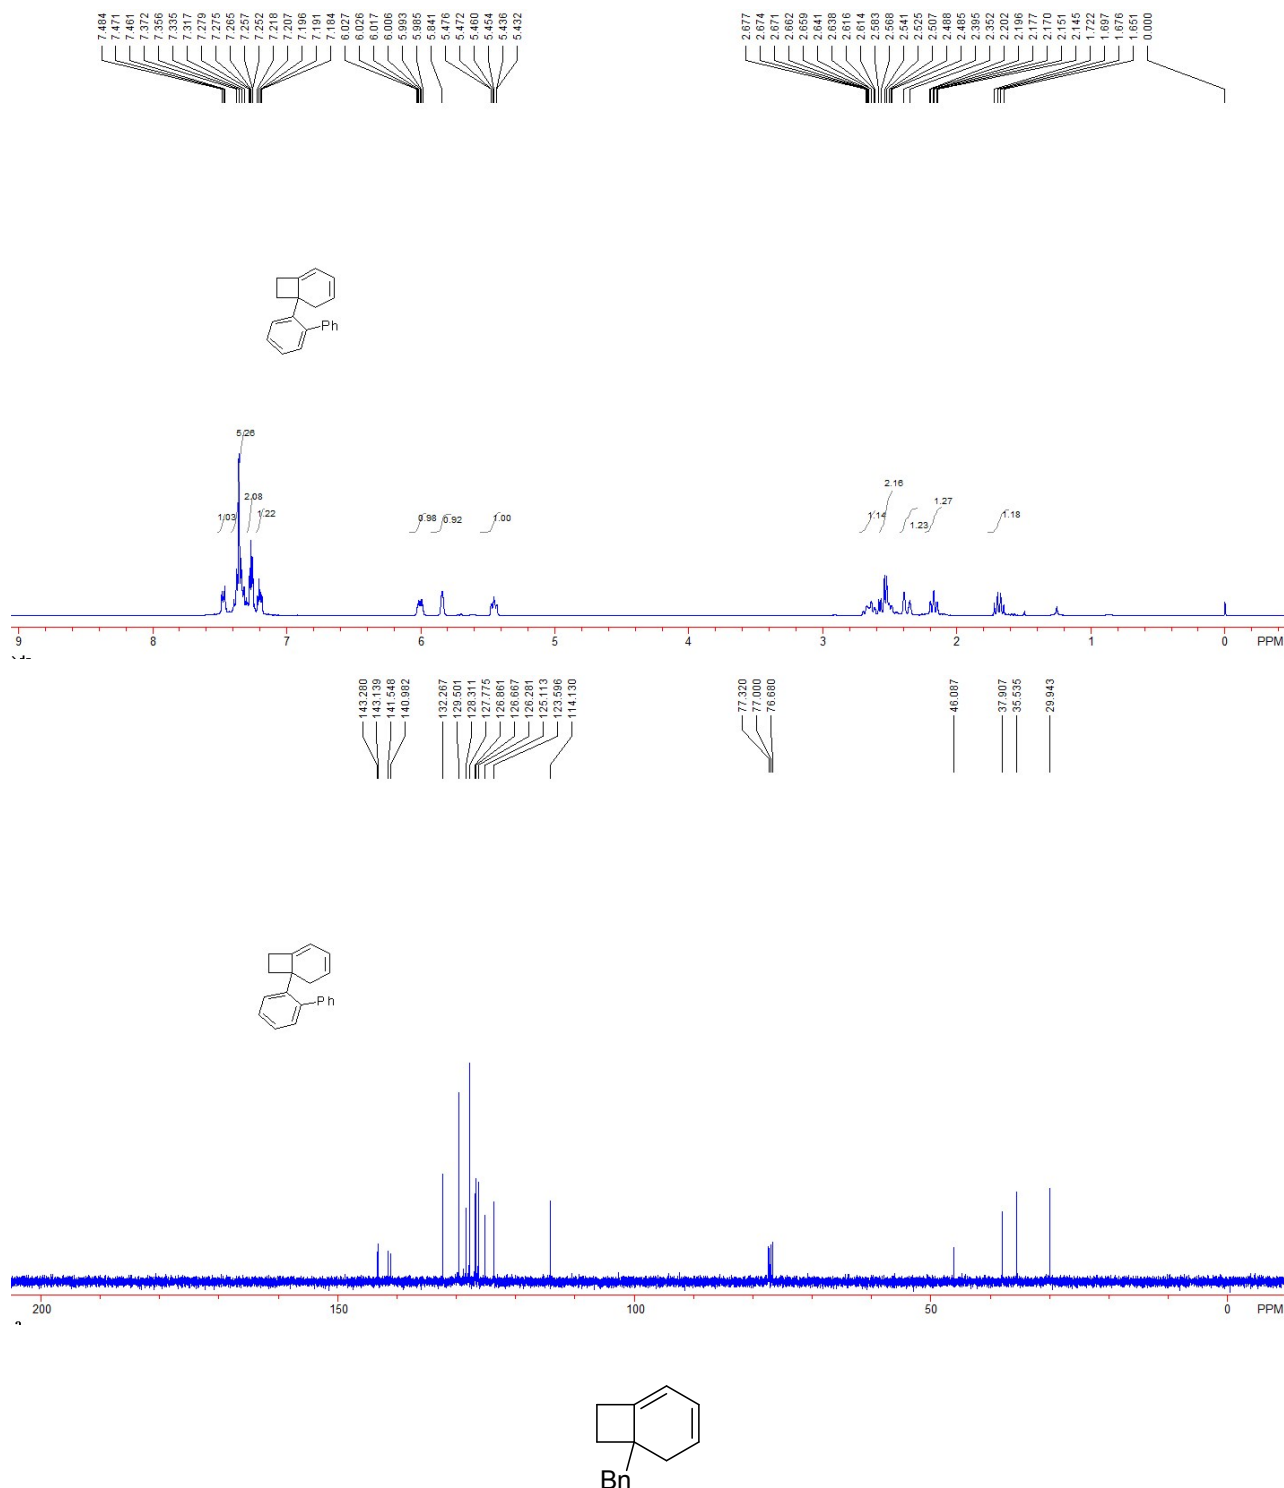

**6-Benzylbicyclo[4.2.0]octa-1,3-diene 60:**

33 mg, yield = 83%. Colorless oil.  $^1\text{H}$  NMR (400 MHz,  $\text{CDCl}_3$ , TMS):  $\delta$  1.64-1.71 (m, 1H, CH), 2.15-2.22 (m, 3H,  $\text{CH}_2$ ), 2.47-2.59 (m, 2H,  $\text{CH}_2$ ), 2.67 (d,  $J = 13.2$  Hz, 1H,  $\text{CH}_2$ ), 2.87 (d,  $J = 13.2$  Hz, 1H,  $\text{CH}_2$ ), 5.55-5.63 (m, 1H, =CH), 5.62-5.63 (m, 1H, =CH), 5.90-5.93 (m, 1H, =CH), 7.19-7.22 (m, 3H, Ar), 7.25-7.28 (m, 2H, Ar).  $^{13}\text{C}$  NMR (100 MHz,  $\text{CDCl}_3$ , TMS):  $\delta$  29.5, 31.3, 33.0, 37.8, 43.2, 112.7, 123.2, 124.7, 125.8, 127.8, 130.0, 139.1, 145.3. IR ( $\text{CH}_2\text{Cl}_2$ )  $\nu$  3028, 2918, 2817, 1671, 1494, 1435, 742, 700, 676  $\text{cm}^{-1}$ . MS (%)  $m/z$  196 ( $\text{M}^+$ , 3.53), 167 (26.67), 152 (4.63), 115 (8.81), 105 (100.00), 91 (84.62), 77 (34.72), 65 (20.02), 51 (11.33). HRMS (EI) calcd. for  $\text{C}_{15}\text{H}_{16}$ : 196.1252, found: 196.1257.

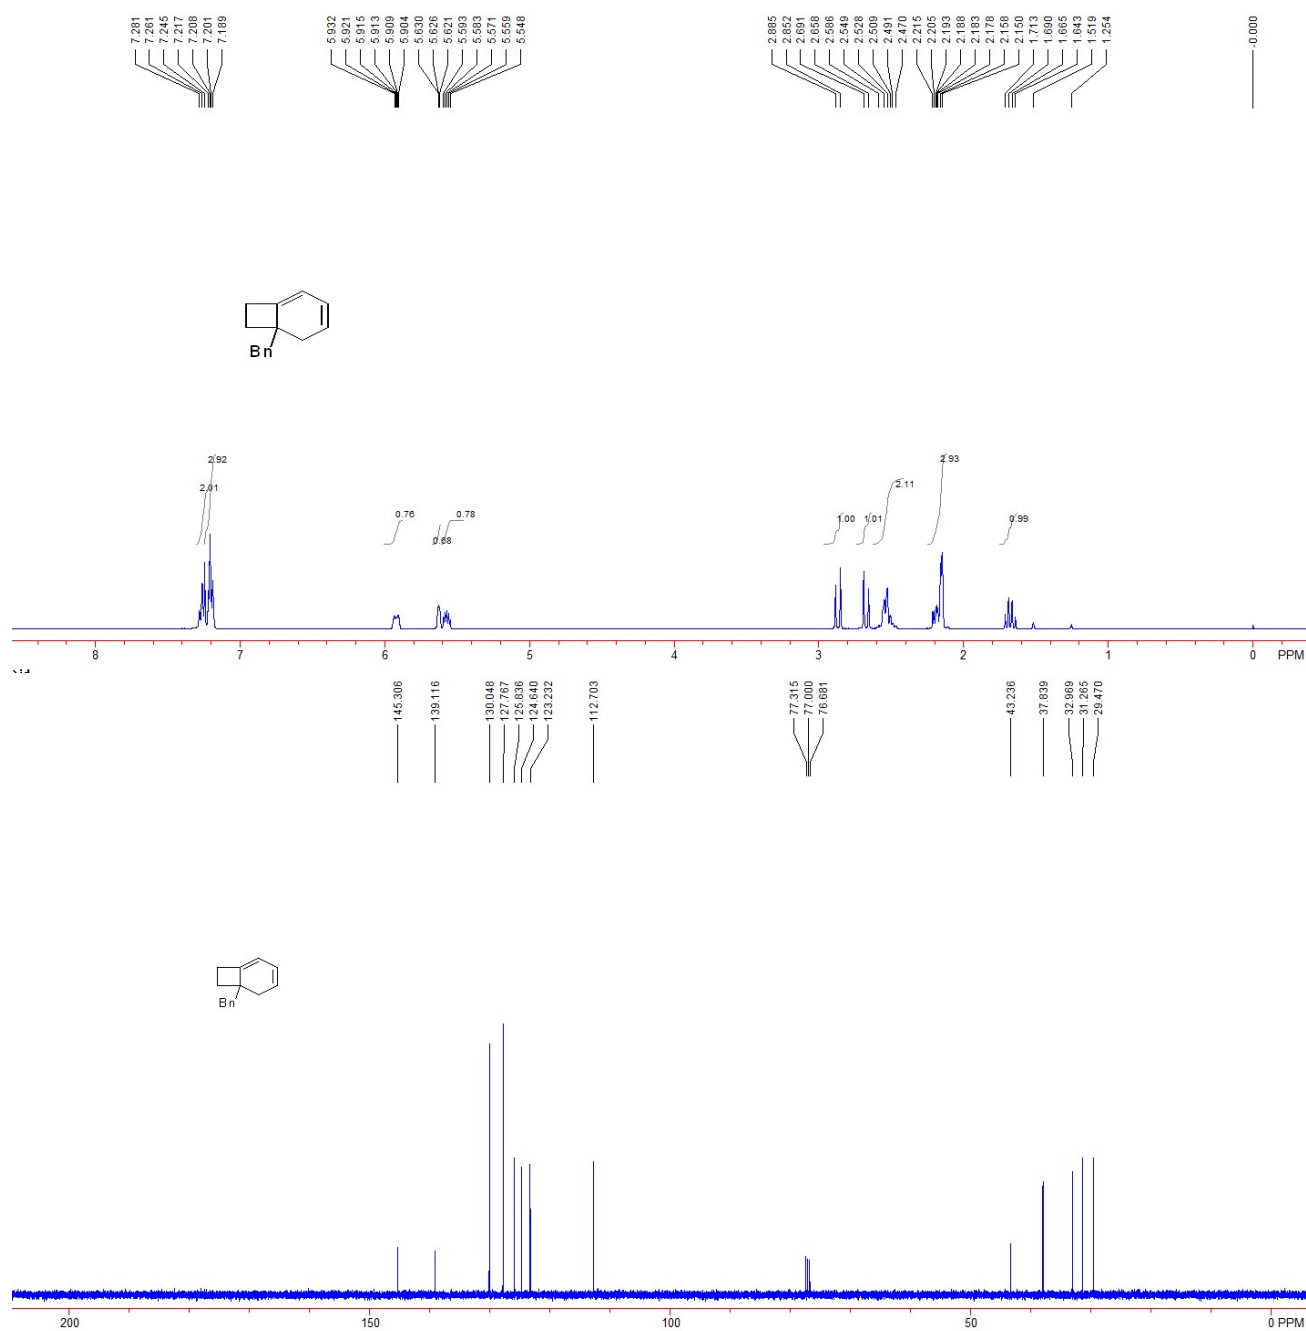

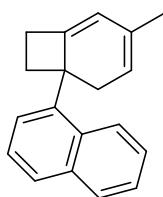

**1-(4-Methylbicyclo[4.2.0]octa-3,5-dien-1-yl)naphthalene 6p:**

45 mg, yield = 91%. Colorless oil.  $^1\text{H}$  NMR (400 MHz,  $\text{CDCl}_3$ , TMS):  $\delta$  1.53 (s, 3H,  $\text{CH}_3$ ), 2.33-2.40 (m, 1H,  $\text{CH}_2$ ), 2.50-2.55 (m, 1H,  $\text{CH}_2$ ), 2.68-2.79 (m, 4H,  $\text{CH}_2$ ), 5.06-5.07 (m, 1H,  $=\text{CH}$ ), 5.86 (br, 1H,  $=\text{CH}$ ), 7.32-7.35 (m, 1H, Ar), 7.41-7.47 (m, 3H, Ar), 7.70 (d,  $J = 8.0$  Hz, 2H, Ar), 7.85-7.87 (m, 2H, Ar).  $^{13}\text{C}$  NMR (100 MHz,  $\text{CDCl}_3$ , TMS):  $\delta$  21.3, 29.8, 35.7, 37.5, 46.8, 118.1, 118.3, 124.2, 124.96, 124.99, 125.10, 125.15, 127.24, 129.4, 130.1, 132.3, 135.0, 139.0, 142.3. IR ( $\text{CH}_2\text{Cl}_2$ )  $\nu$  2928, 2855, 2813, 1680, 1508, 1252, 851, 775, 732  $\text{cm}^{-1}$ . MS (%)  $m/z$  246 ( $\text{M}^+$ , 54.75), 231 (67.33), 218 (100.00), 203 (54.25), 189 (25.62), 165 (16.43), 141 (56.29), 115 (14.89), 101 (16.02), 108 (20.68). HRMS (EI) calcd. for  $\text{C}_{19}\text{H}_{18}$ : 246.1409, found: 246.1411.

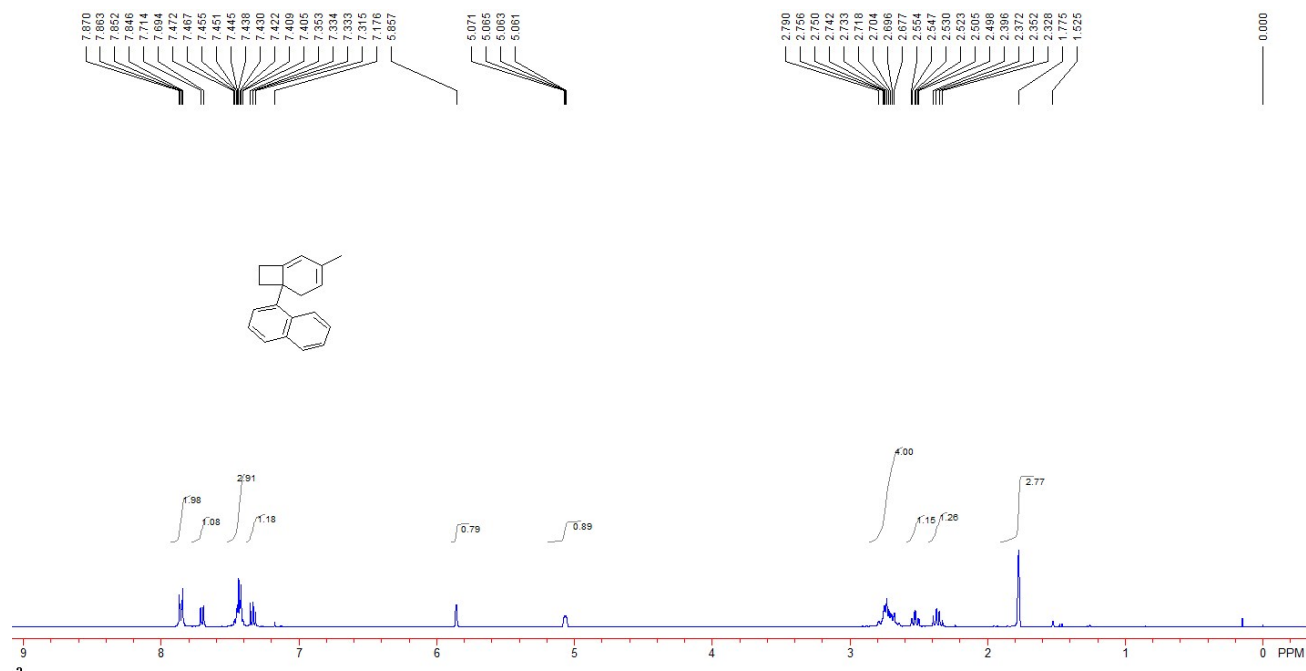

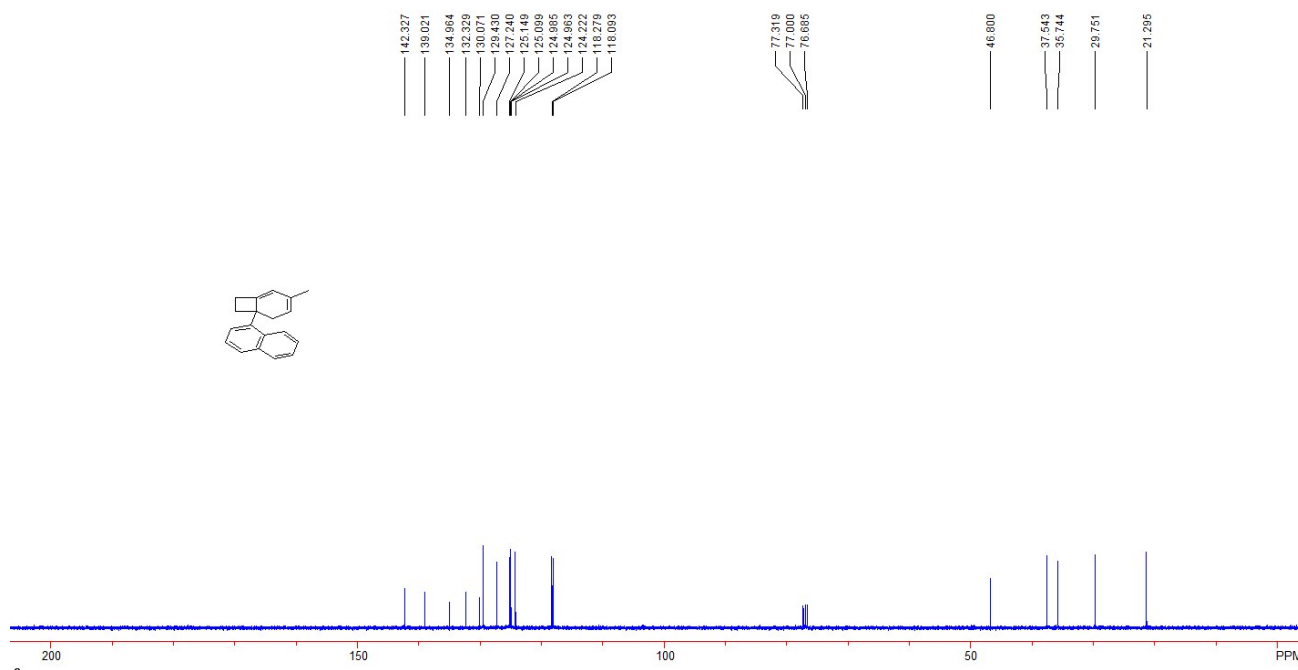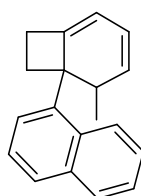

**1-(2-Methylbicyclo[4.2.0]octa-3,5-dien-1-yl)naphthalene 6q:**

44 mg, yield = 90%. Colorless oil (Mixtures of two diastereomers, dr = 6.4/1). <sup>1</sup>H NMR (400 MHz, CDCl<sub>3</sub>, TMS): δ 1.27 (d, *J* = 7.2 Hz, 3H, CH<sub>3</sub>), 2.19-2.25 (m, 1H), 2.53-2.74 (m, 3H), 2.79-2.85 (m, 1H), 5.35-5.39 (m, 1H, =CH), 5.84-5.87 (m, 1H, =CH), 5.90-5.92 (m, 1H, =CH), 7.33-7.37 (m, 1H, Ar), 7.41-7.47 (m, 2H, Ar), 7.54-7.56 (m, 1H, Ar), 7.71-7.76 (m, 2H, Ar), 7.87-7.89 (m, 1H, Ar). <sup>13</sup>C NMR (100 MHz, CDCl<sub>3</sub>, TMS): δ 15.8, 27.4, 28.4, 36.1, 51.4, 113.8, 122.3, 123.7, 124.8, 124.9, 125.1, 125.2, 127.2, 128.6, 130.1, 130.3, 135.2, 140.0, 140.5. IR (CH<sub>2</sub>Cl<sub>2</sub>) ν 3030, 2955, 2858, 1594, 1393, 1061, 907, 842, 800, 719 cm<sup>-1</sup>. MS (%) *m/z* 246 (M<sup>+</sup>, 23.68), 231 (60.87), 218 (100.00), 203 (49.09), 189 (14.88), 165 (15.57), 141 (71.77), 101 (15.54), 108 (20.90). HRMS (EI) calcd. for C<sub>19</sub>H<sub>18</sub>: 246.1409, found: 246.1405.

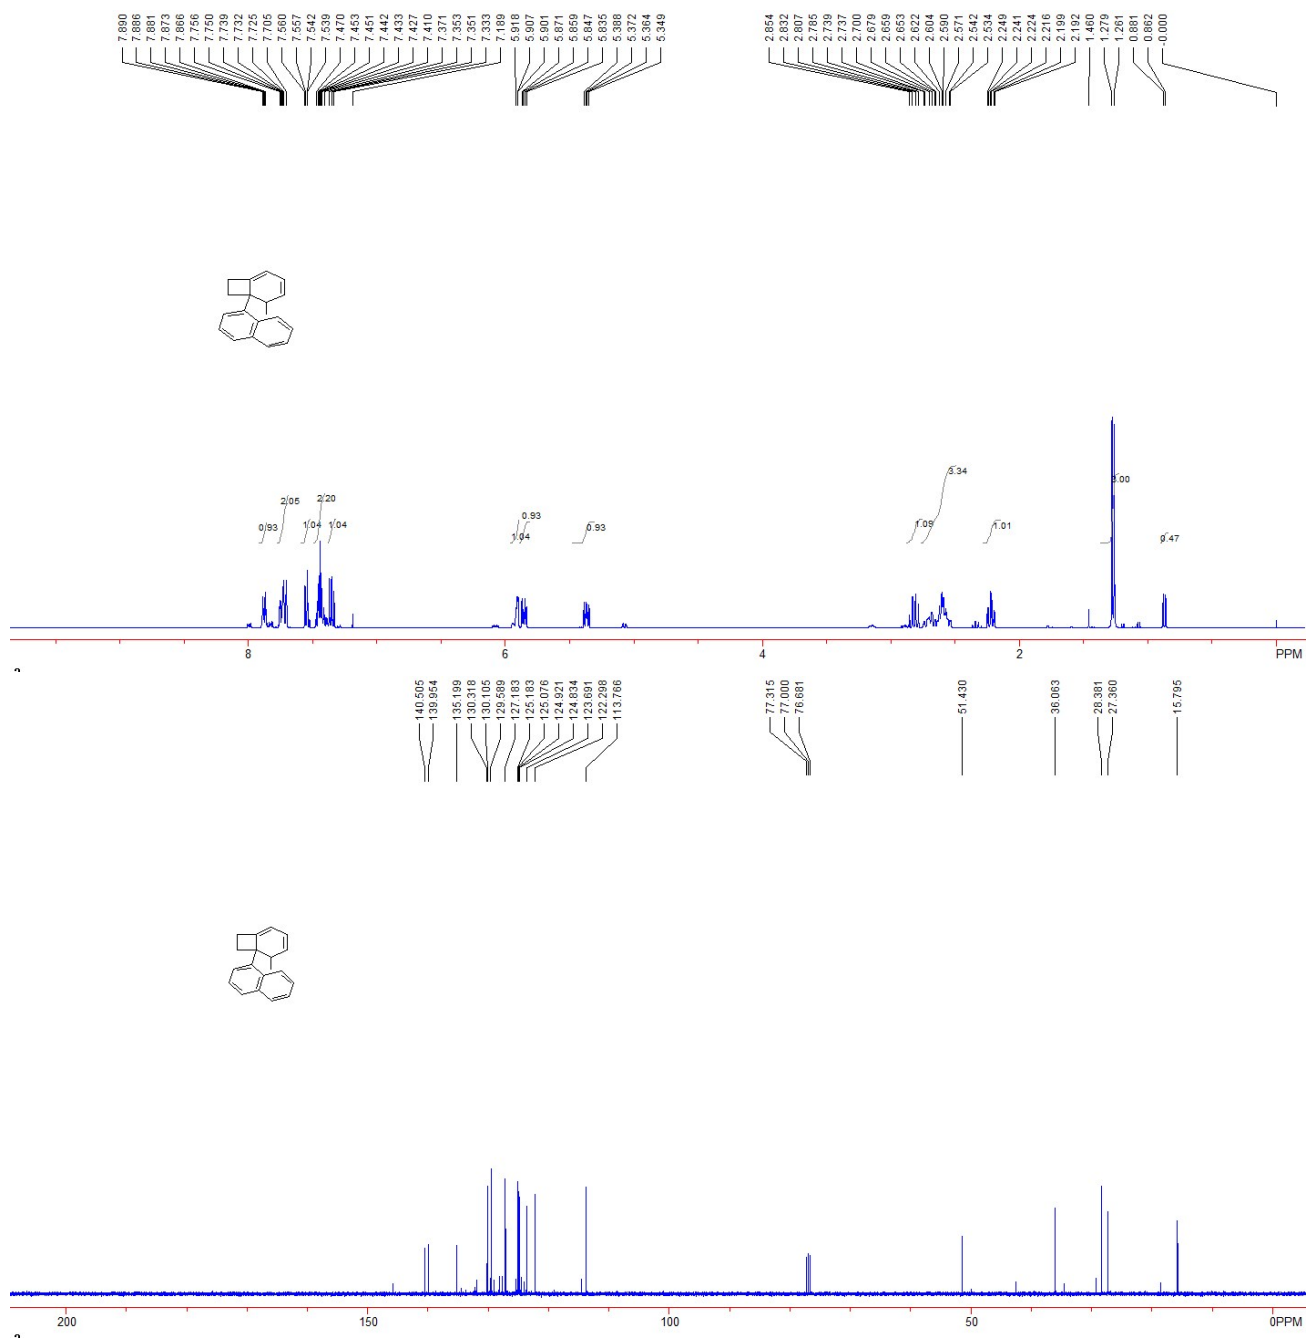

## 6. Evidences for the Existence of Rotamer.

### 6.1 HPLC resolution of compound **6a**.

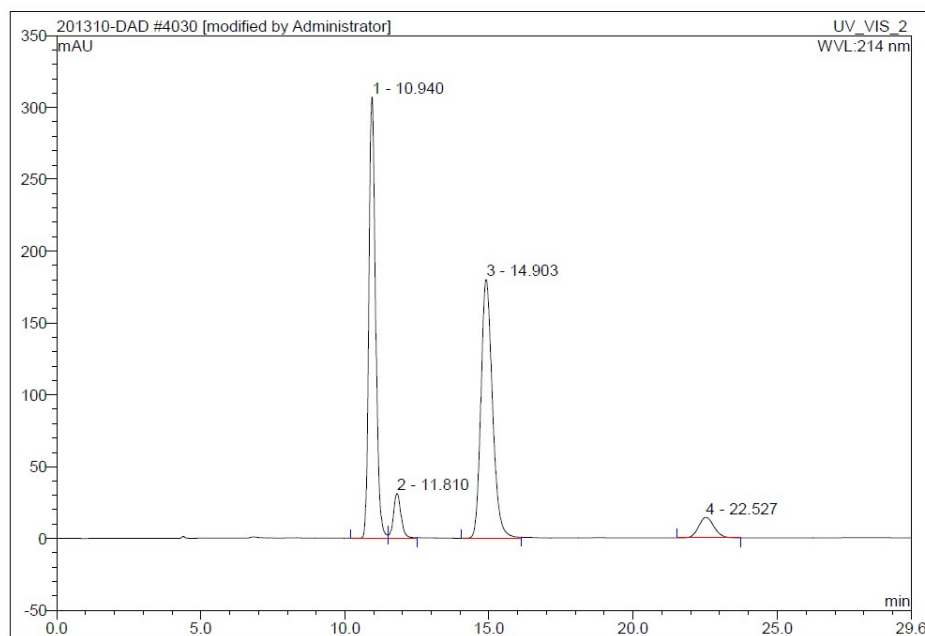

| No.    | Ret.Time<br>min | Peak Name | Height<br>mAU | Area<br>mAU*min | Rel.Area<br>% | Amount | Type |
|--------|-----------------|-----------|---------------|-----------------|---------------|--------|------|
| 1      | 10.94           | n.a.      | 307.251       | 82.781          | 44.77         | n.a.   | BM * |
| 2      | 11.81           | n.a.      | 31.293        | 9.552           | 5.17          | n.a.   | M *  |
| 3      | 14.90           | n.a.      | 179.996       | 83.638          | 45.23         | n.a.   | BM * |
| 4      | 22.53           | n.a.      | 14.326        | 8.941           | 4.84          | n.a.   | MB*  |
| Total: |                 |           | 532.865       | 184.911         | 100.00        | 0.000  |      |

### 6.2 $^1\text{H}$ NMR of compound **6m** at rt and at 50 °C.

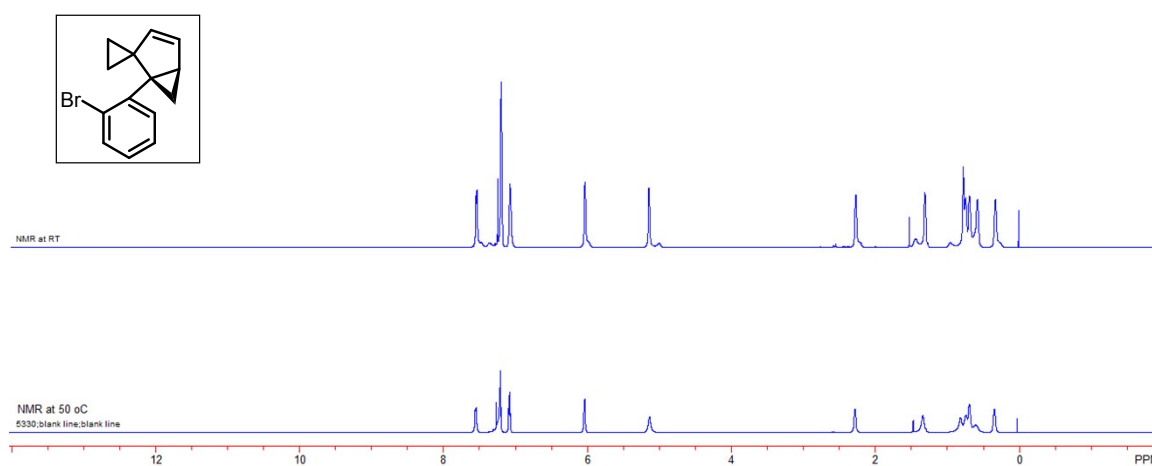

## 7. $^1\text{H}$ and $^{13}\text{C}$ NMR Spectra of the Compound 7j.

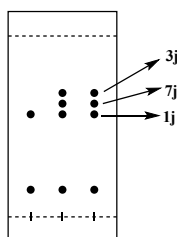

Figure SI-1: TLC Detection of compound 7j.

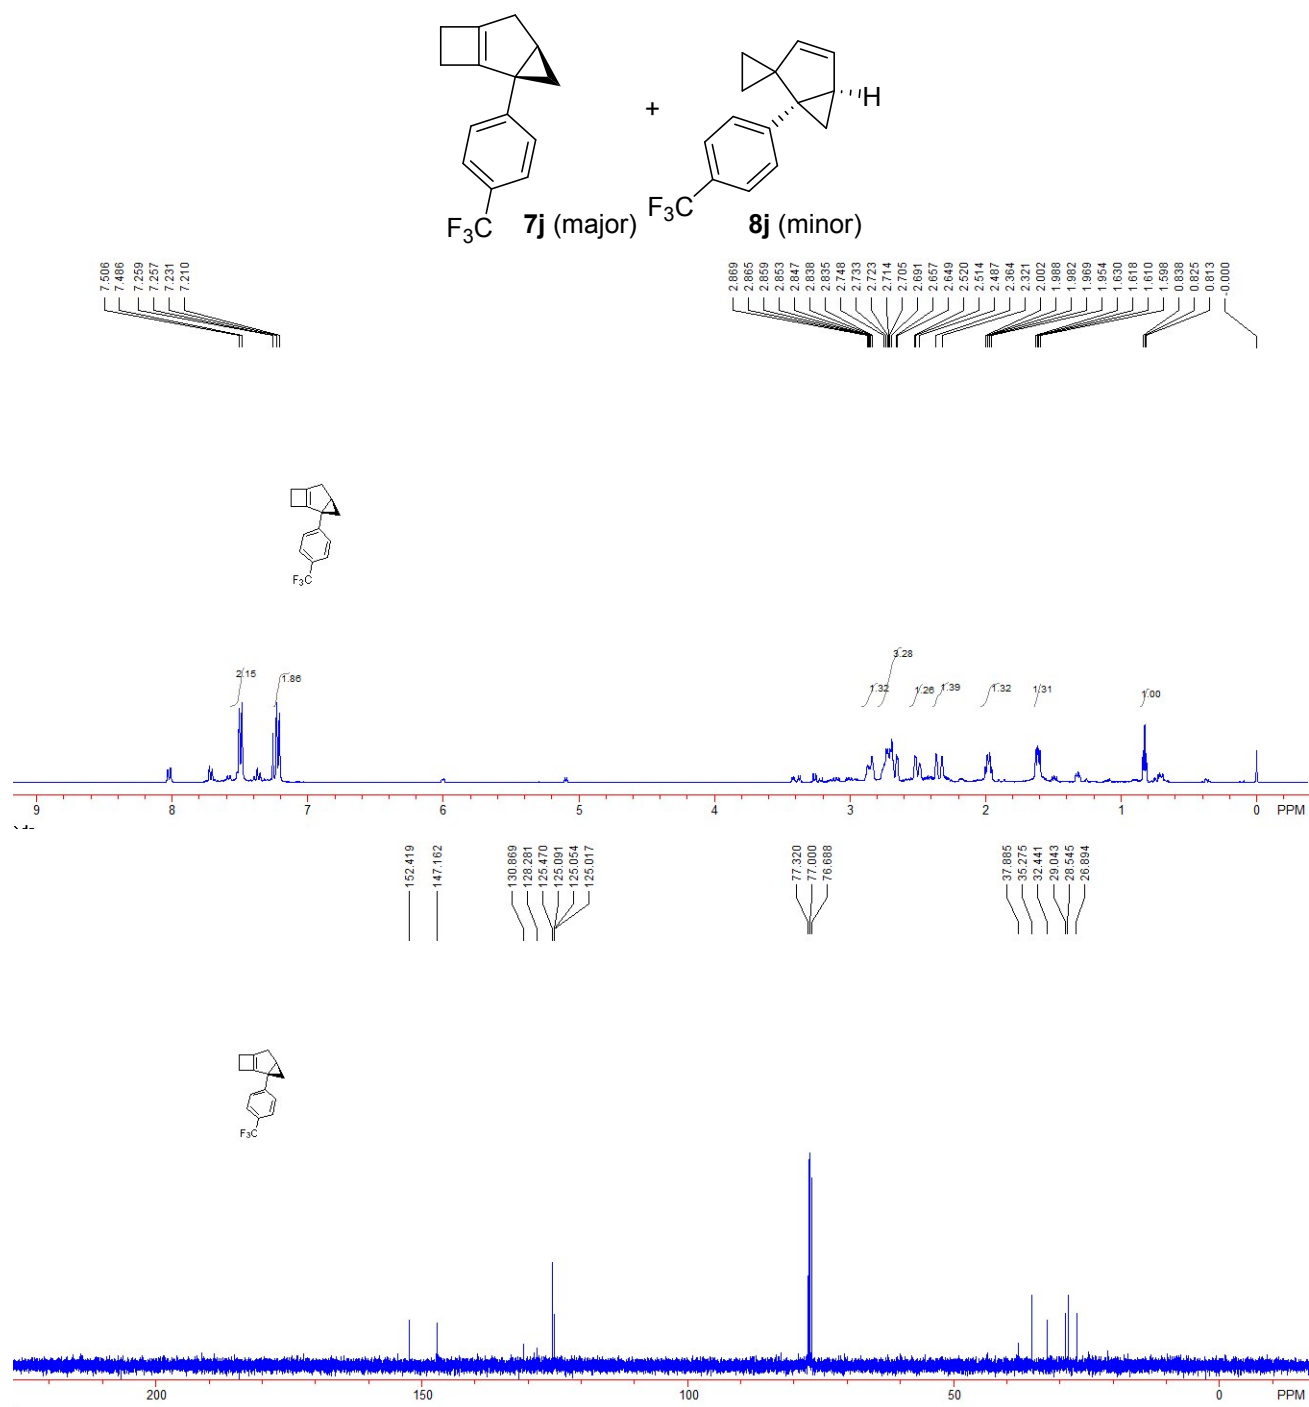

## 8. $^1\text{H}$ NMR Spectra of the Deuterated Compounds.

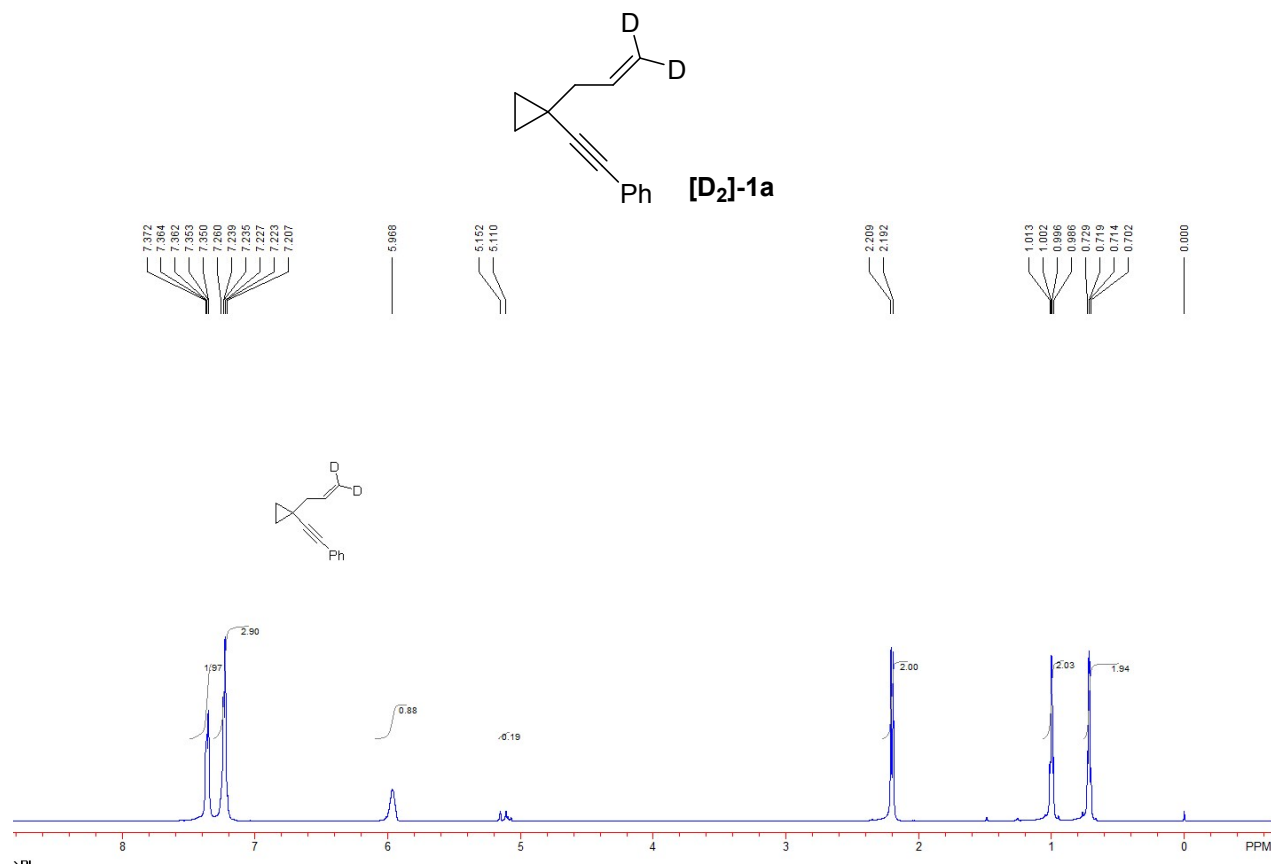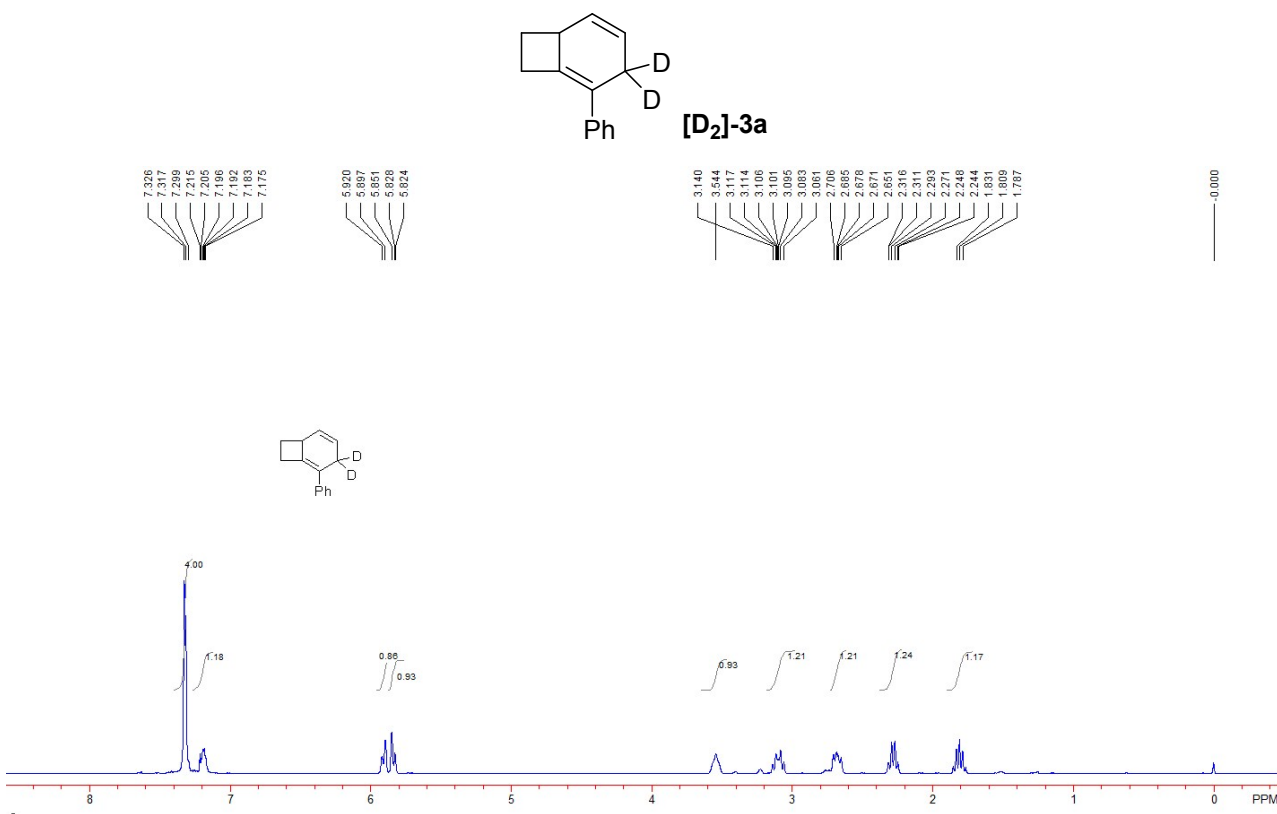

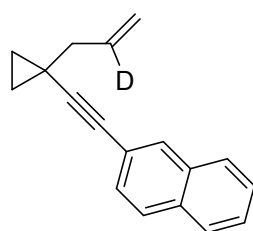

**[D<sub>1</sub>]-1n**

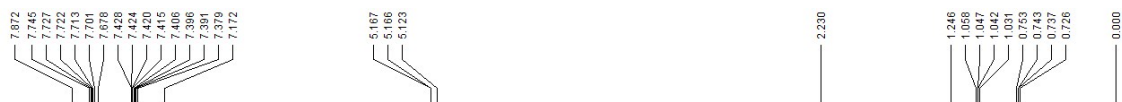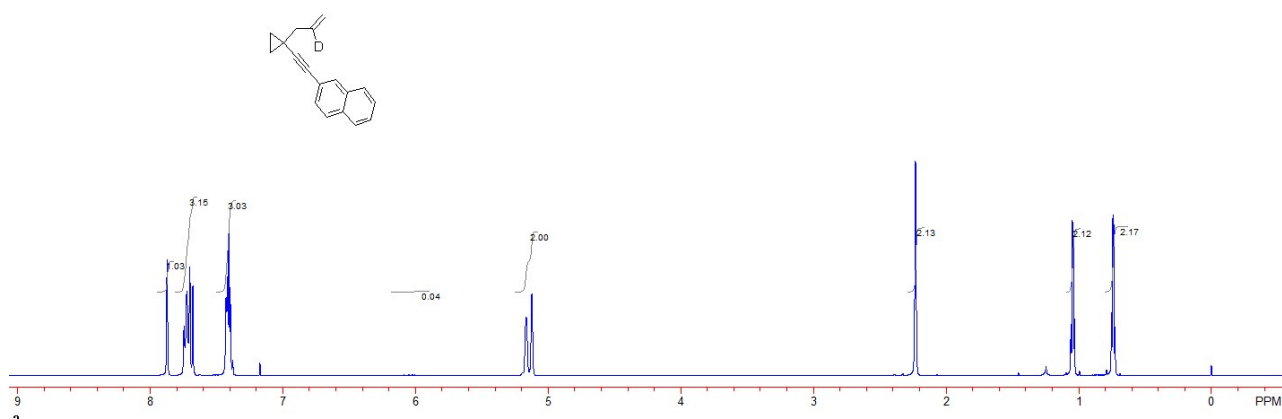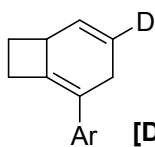

**[D<sub>1</sub>]-3n: Ar = 2-naphth**

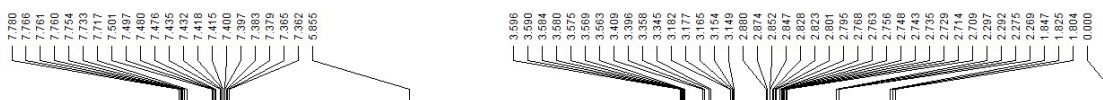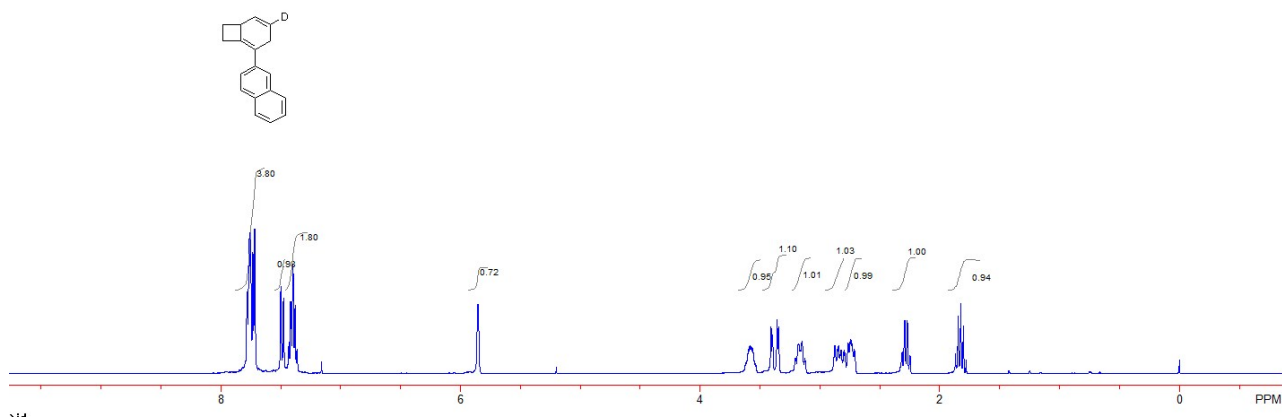

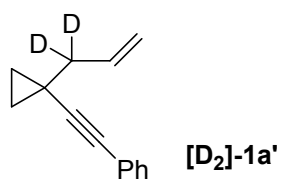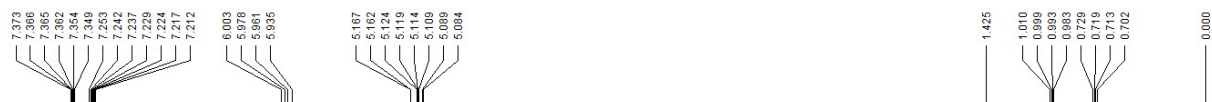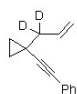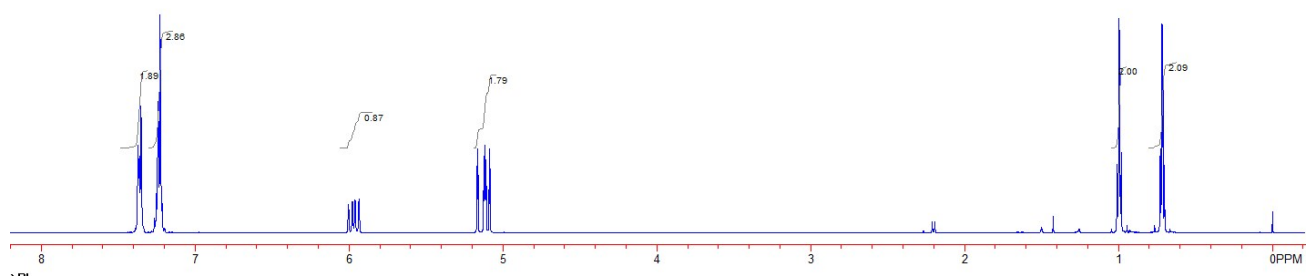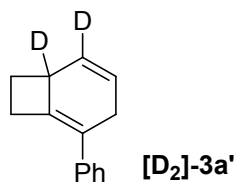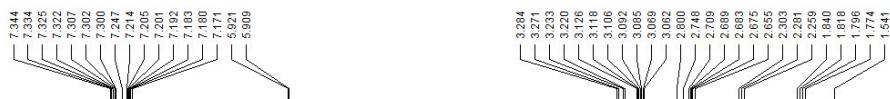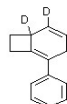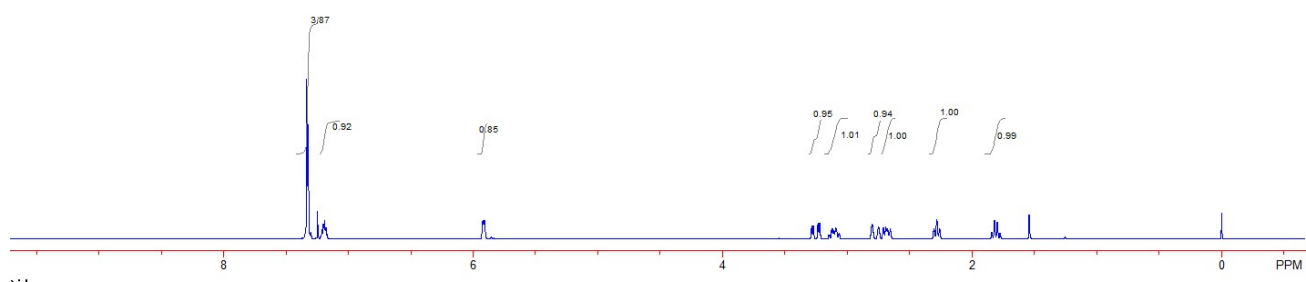

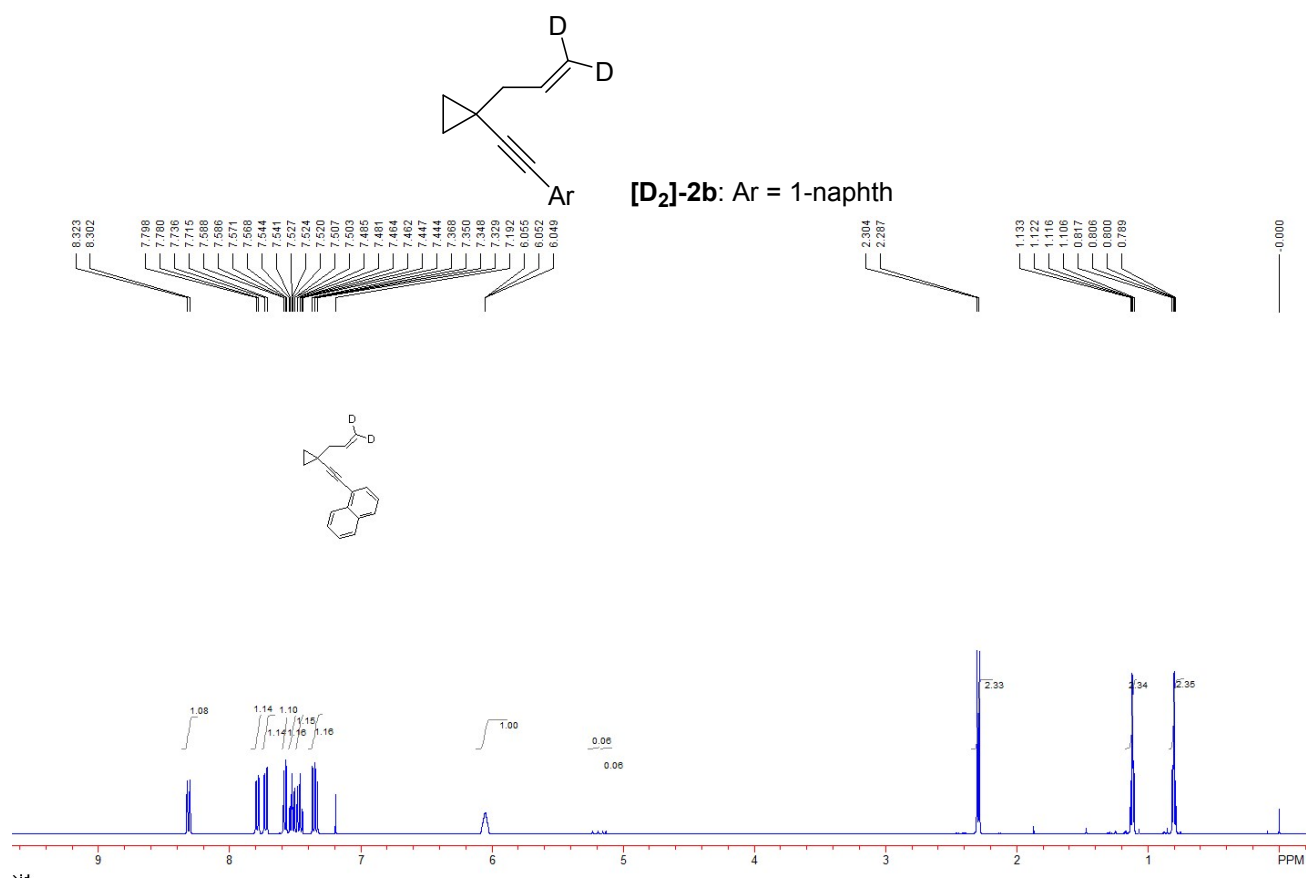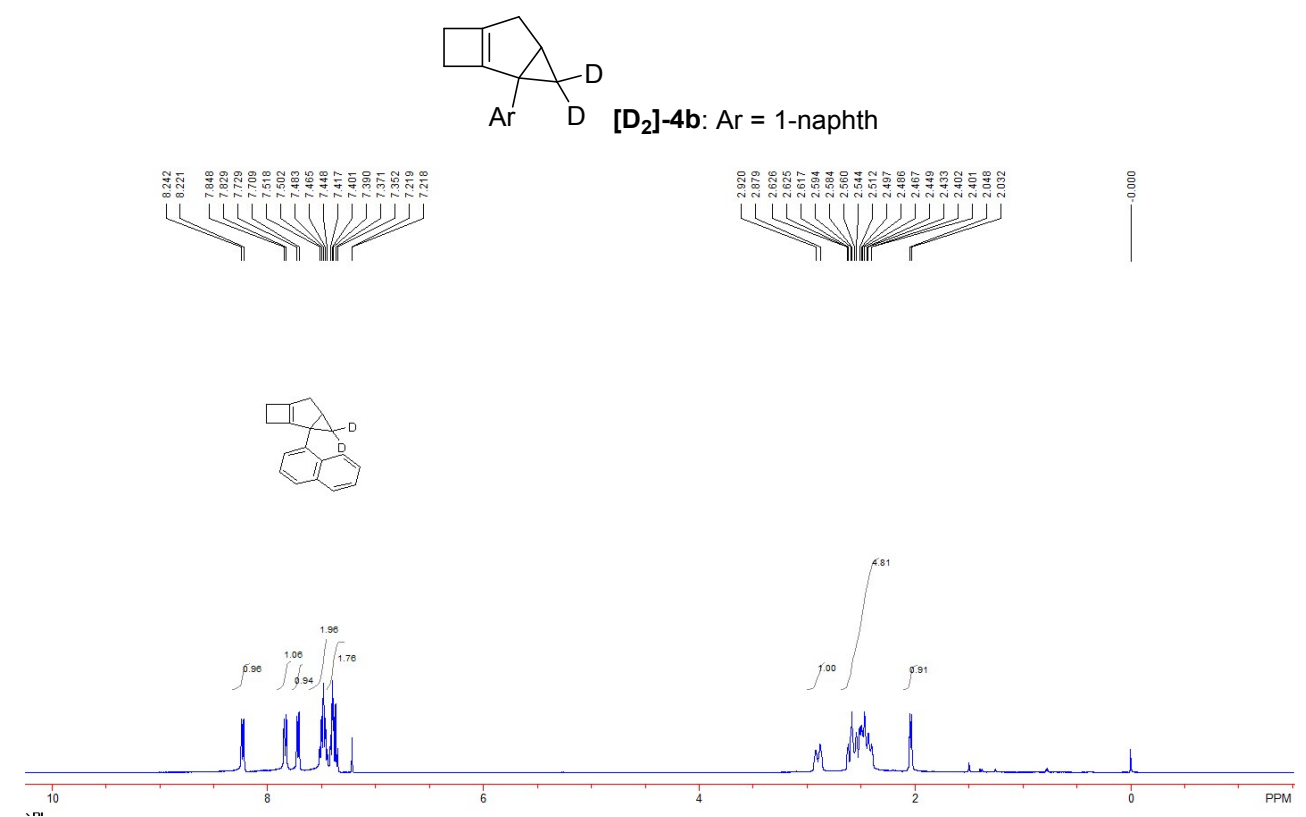

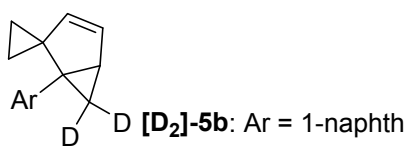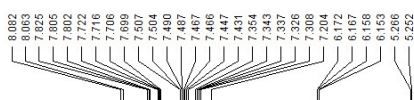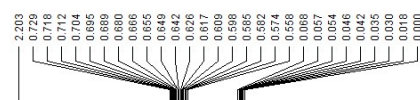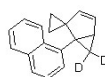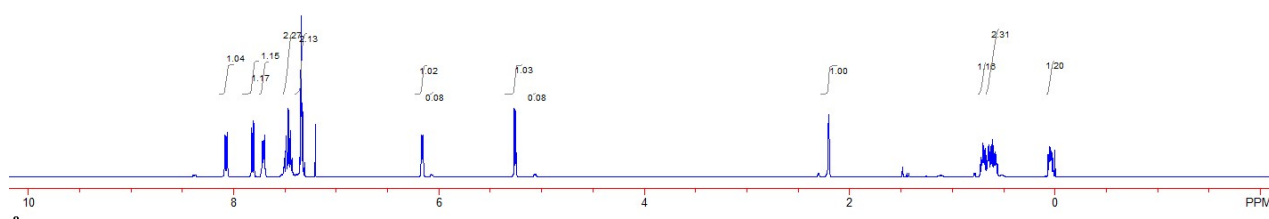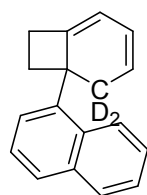

**[D<sub>2</sub>]-6b**

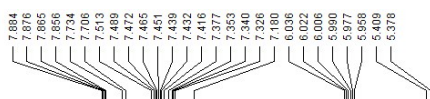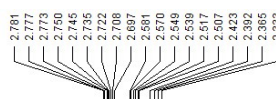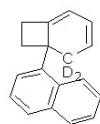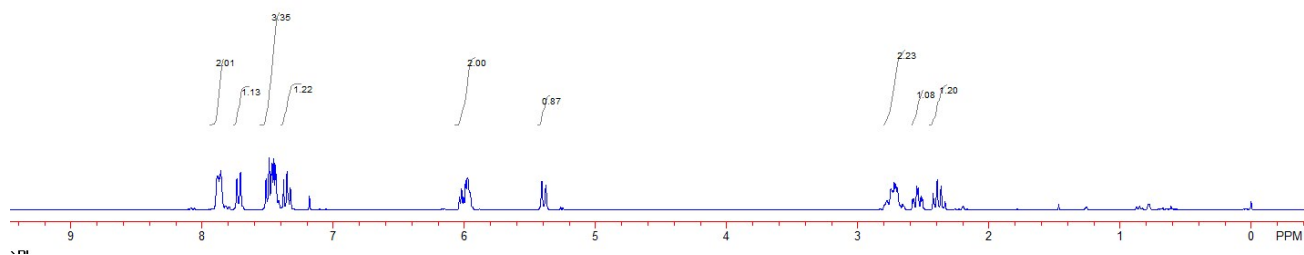

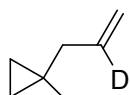

Ar [D<sub>1</sub>]-2b: Ar = 1-naphth

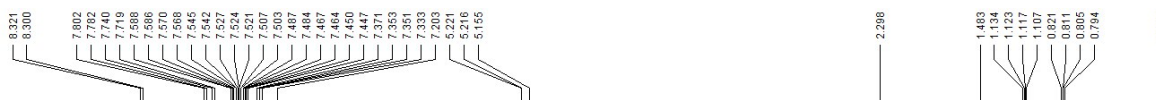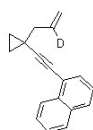

Ar [D<sub>1</sub>]-4b: Ar = 1-naphth

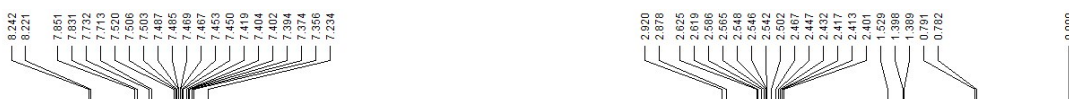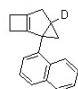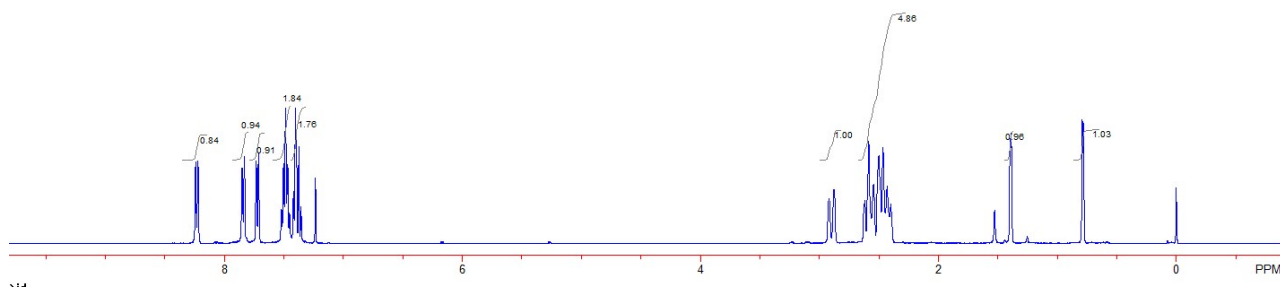

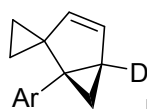

**[D<sub>1</sub>]-5b:** Ar = 1-naphth

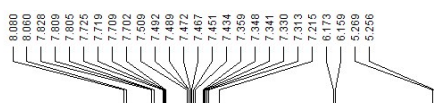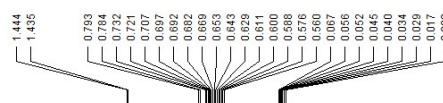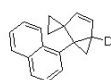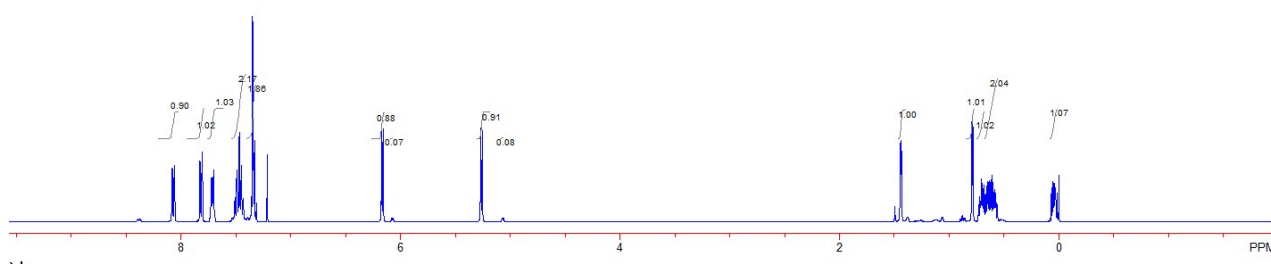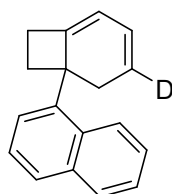

**[D<sub>1</sub>]-6b**

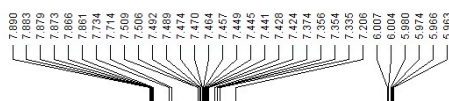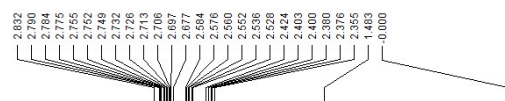

## 9. Crystallographic Information.

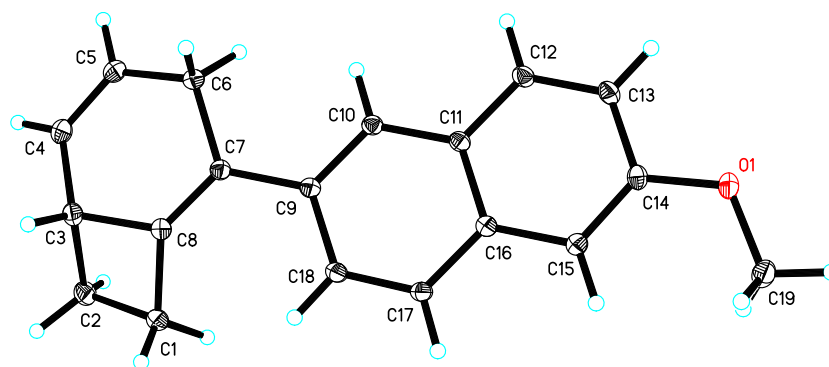

The crystal data of **3o** have been deposited in CCDC with number 1048653. Empirical formula:  $C_{19}H_{18}O$ , Formula weight: 262.33, Crystal system: Monoclinic, Space group:  $P 1 2_1/n 1$ , Unit cell dimensions:  $a = 9.9373(12) \text{ \AA}$ ,  $\alpha = 90^\circ$ ;  $b = 5.8477(7) \text{ \AA}$ ,  $\beta = 98.064(2)^\circ$ ;  $c = 23.768(3) \text{ \AA}$ ,  $\gamma = 90^\circ$ . Volume:  $1367.5(3) \text{ \AA}^3$ ,  $Z = 4$ , Density (calculated):  $1.274 \text{ Mg/m}^3$ ,  $F(000) = 560$ , Crystal size:  $0.25 \times 0.22 \times 0.2 \text{ mm}^3$ , Final R indices [ $I > 2\sigma(I)$ ]:  $R1 = 0.0498$ ,  $wR2 = 0.1357$ .

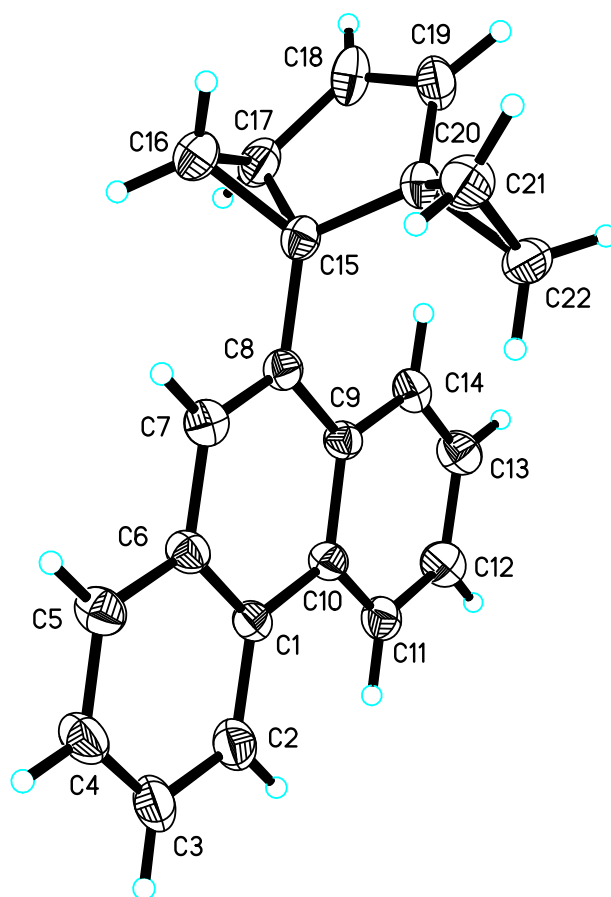

The crystal data of **5a** have been deposited in CCDC with number 1033827. Empirical formula:  $C_{22}H_{18}$ , Formula weight: 282.36, Crystal system: Orthorhombic, Space group:  $Pna2_1$ , Unit cell dimensions:  $a = 22.283(3) \text{ \AA}$ ,  $\alpha = 90^\circ$ ;  $b = 10.1485(15) \text{ \AA}$ ,  $\beta = 90^\circ$ ;  $c = 6.7864(11) \text{ \AA}$ ,  $\gamma = 90^\circ$ . Volume:  $1534.7(4) \text{ \AA}^3$ ,  $Z = 4$ , Density (calculated):  $1.222 \text{ Mg/m}^3$ ,  $F(000) = 600$ , Crystal size:  $0.211 \times 0.167 \times 0.123 \text{ mm}^3$ , Final R indices [ $I > 2\sigma(I)$ ]:  $R1 = 0.0455$ ,  $wR2 = 0.1115$ .

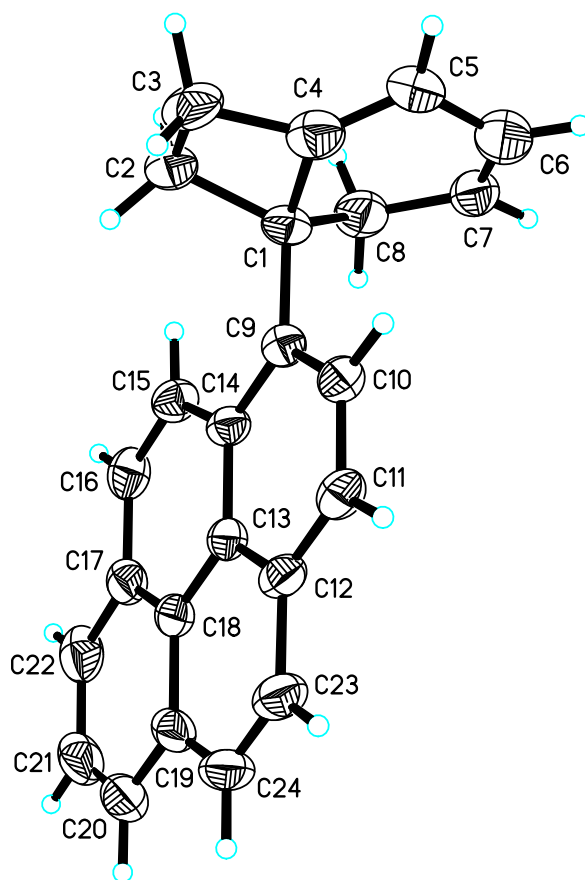

The crystal data of **6c** have been deposited in CCDC with number 1036129. Empirical formula:  $C_{24}H_{18}$ , Formula weight: 306.38, Crystal system: Monoclinic, Space group: P 2<sub>1</sub>/n, Unit cell dimensions:  $a = 7.4014(12)$  Å,  $\alpha = 90^\circ$ ;  $b = 11.2513(18)$  Å,  $\beta = 91.021(4)^\circ$ ;  $c = 19.726(3)$  Å,  $\gamma = 90^\circ$ . Volume:  $1642.4(5)$  Å<sup>3</sup>,  $Z = 4$ , Density (calculated): 1.239 Mg/m<sup>3</sup>,  $F(000) = 648$ , Crystal size: 0.211 x 0.134 x 0.056 mm<sup>3</sup>, Final R indices [ $I > 2\sigma(I)$ ]:  $R1 = 0.0744$ ,  $wR2 = 0.1758$ .

## 10. 2D-NMR Data of Compounds 3a, 4b, 5a and 6a.

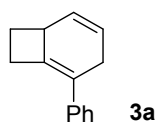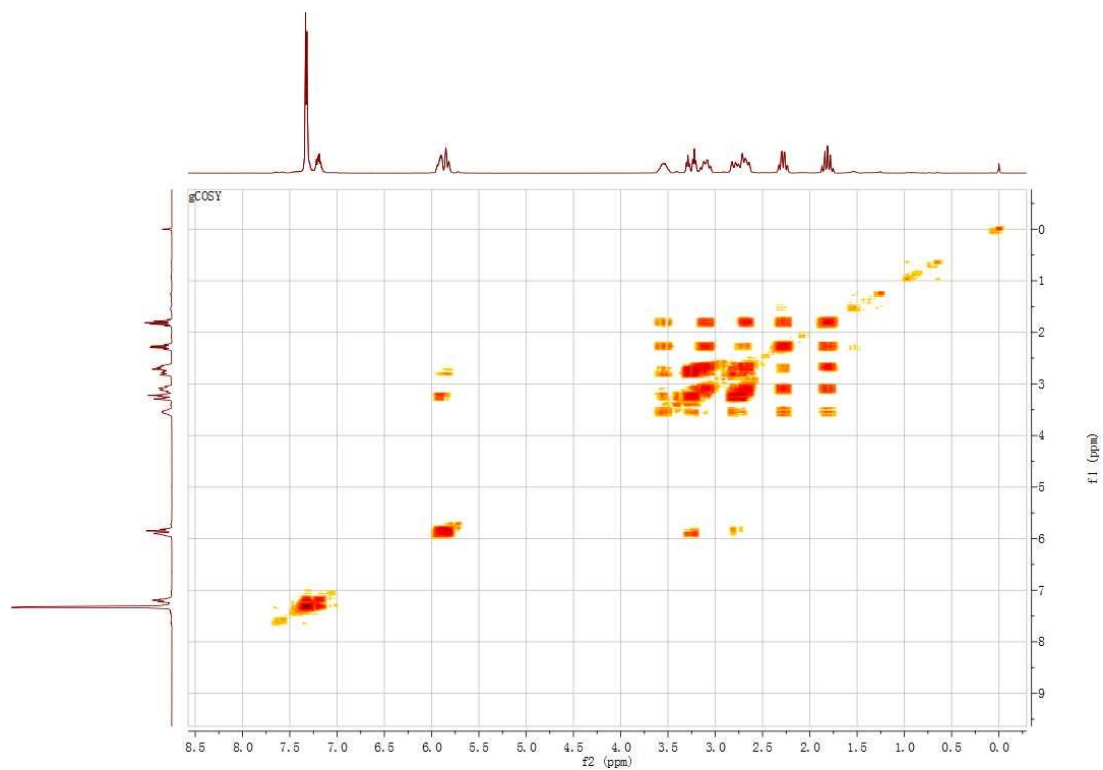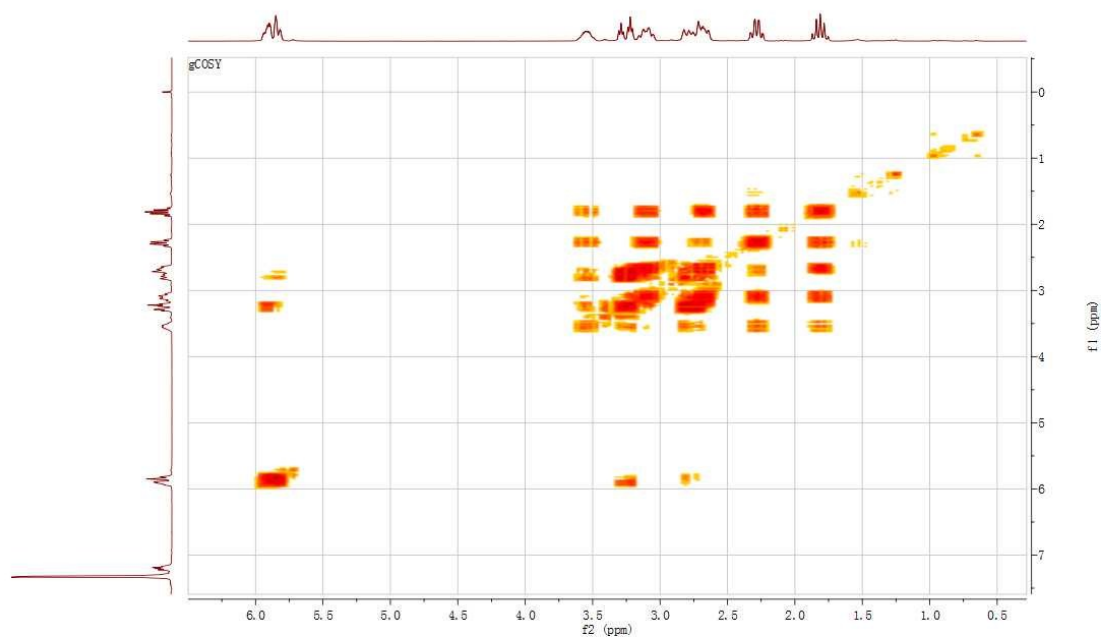

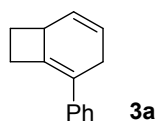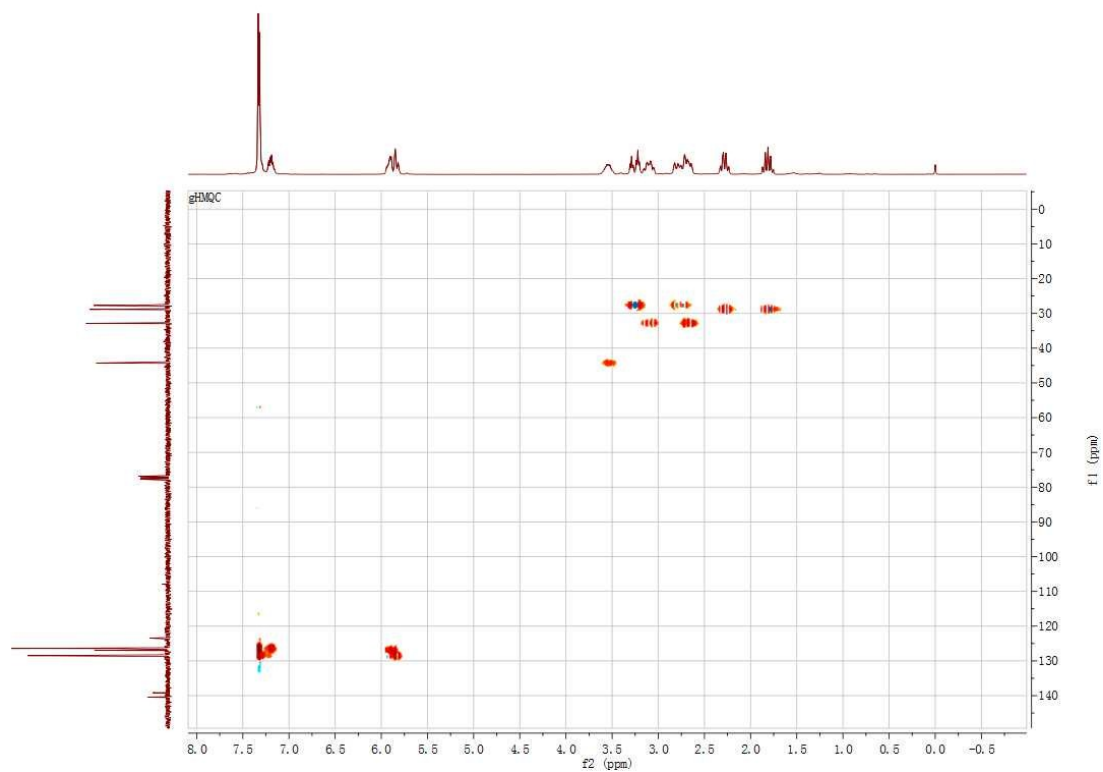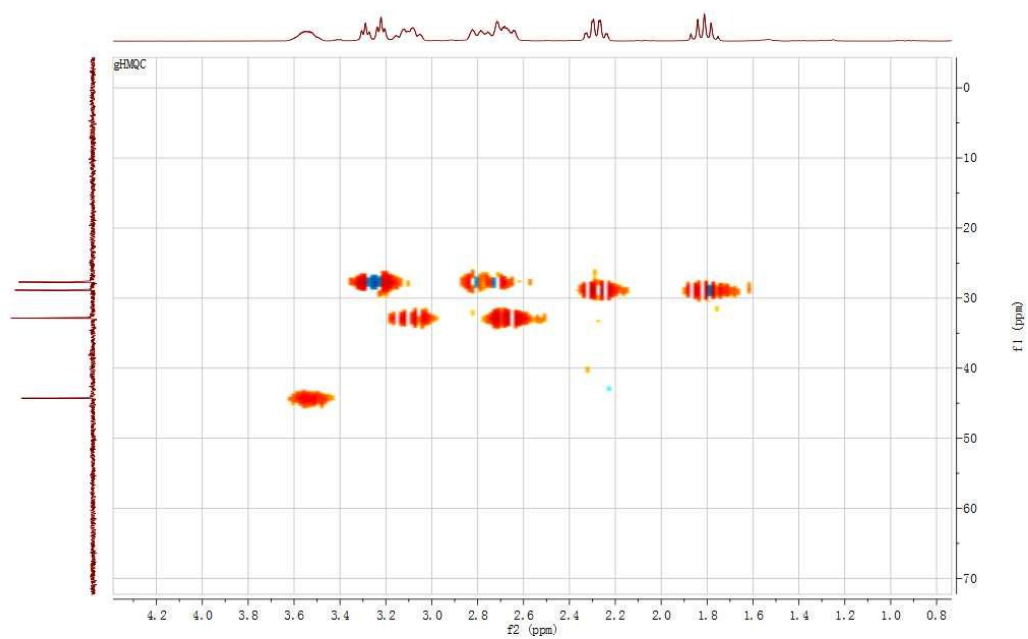

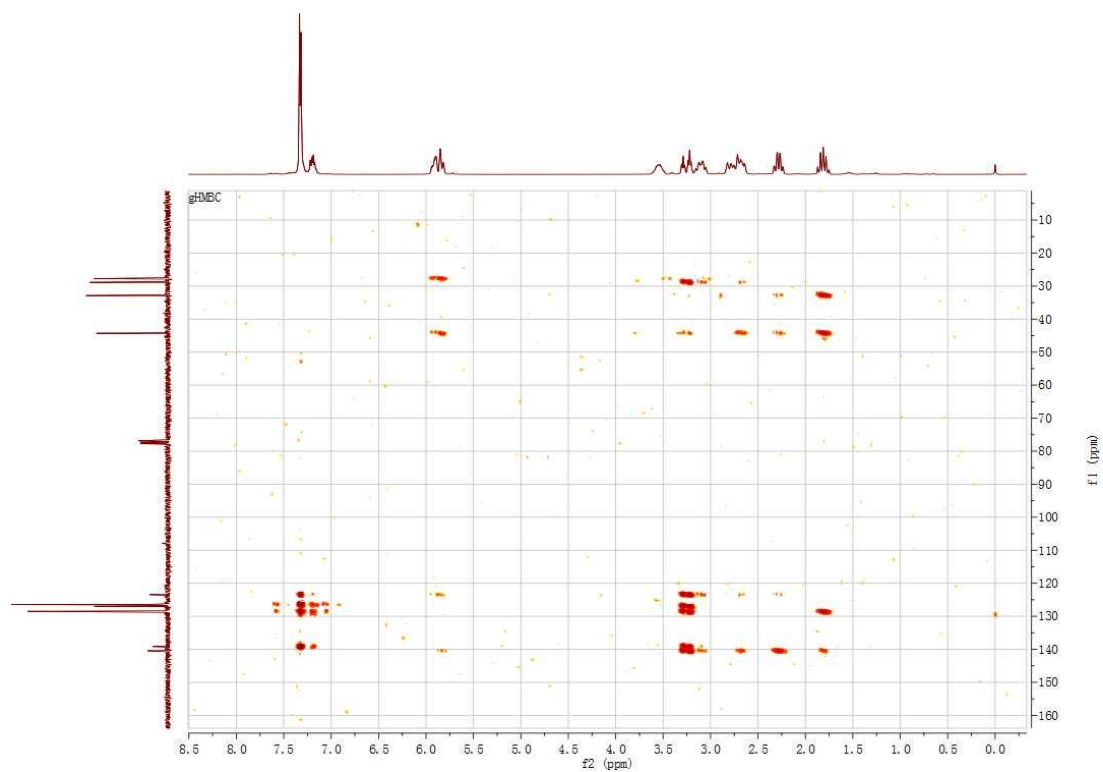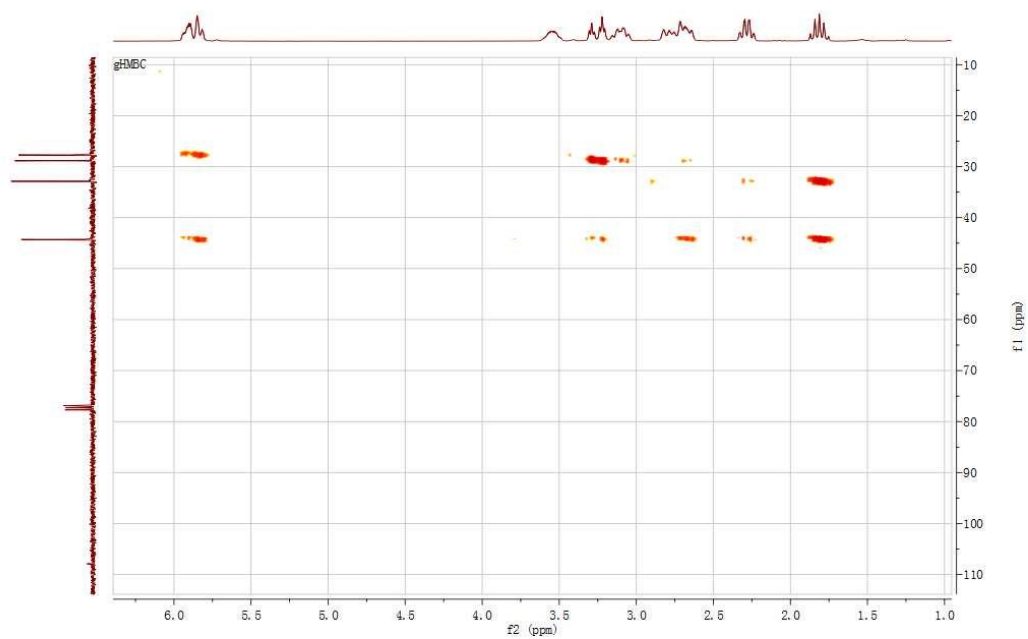

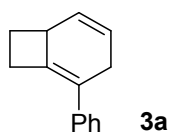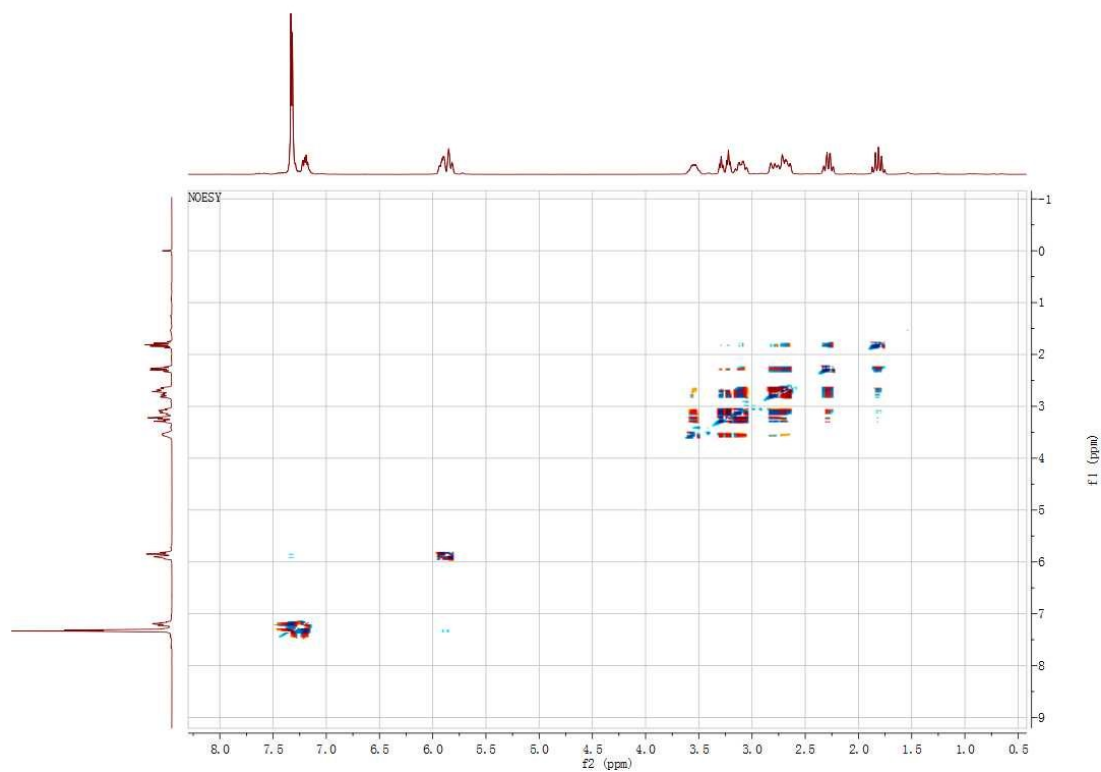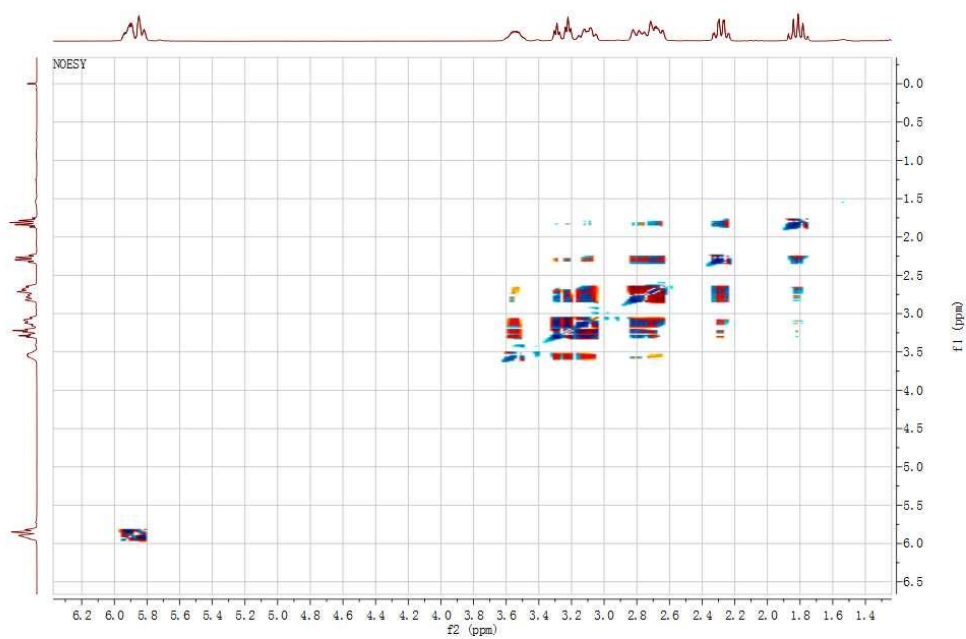

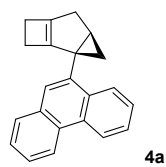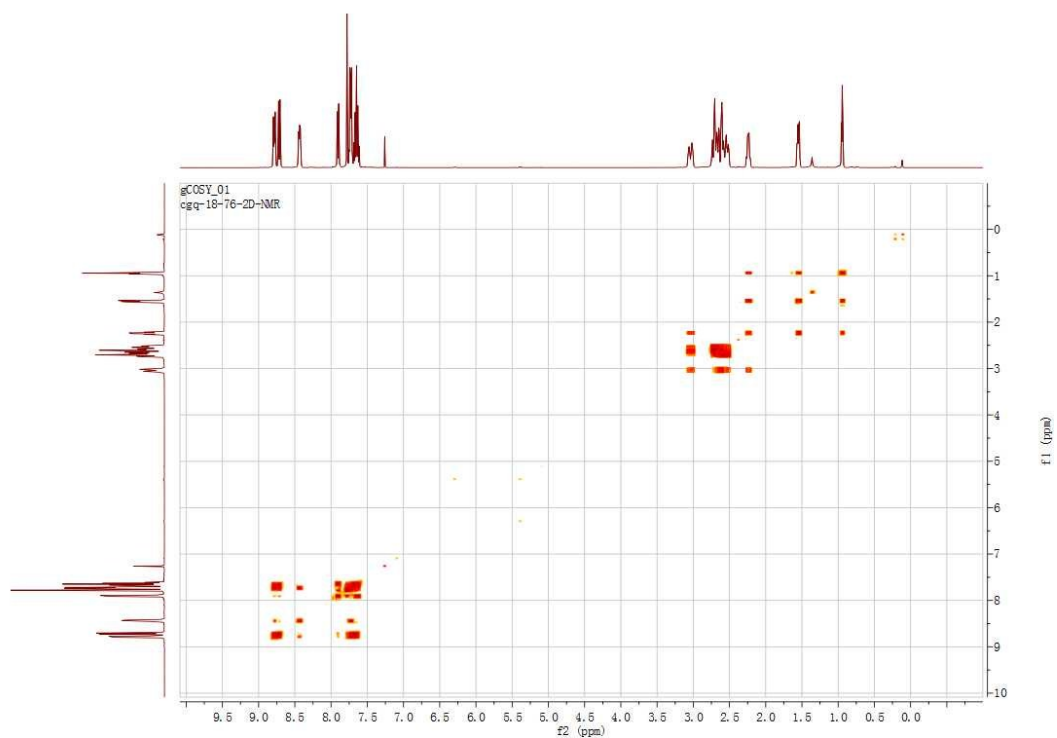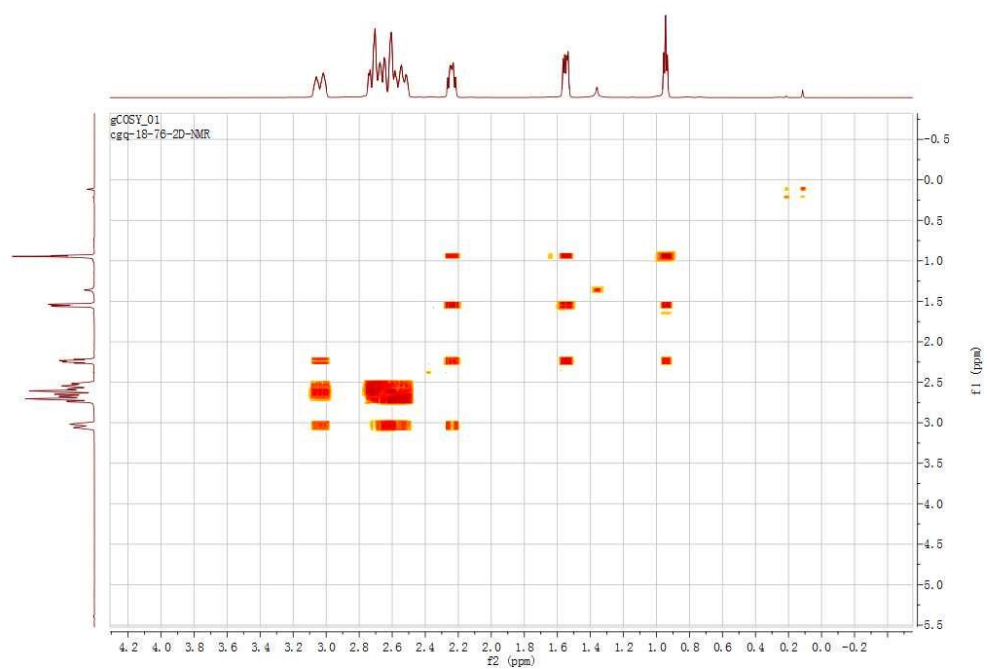

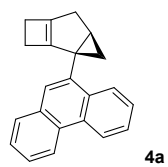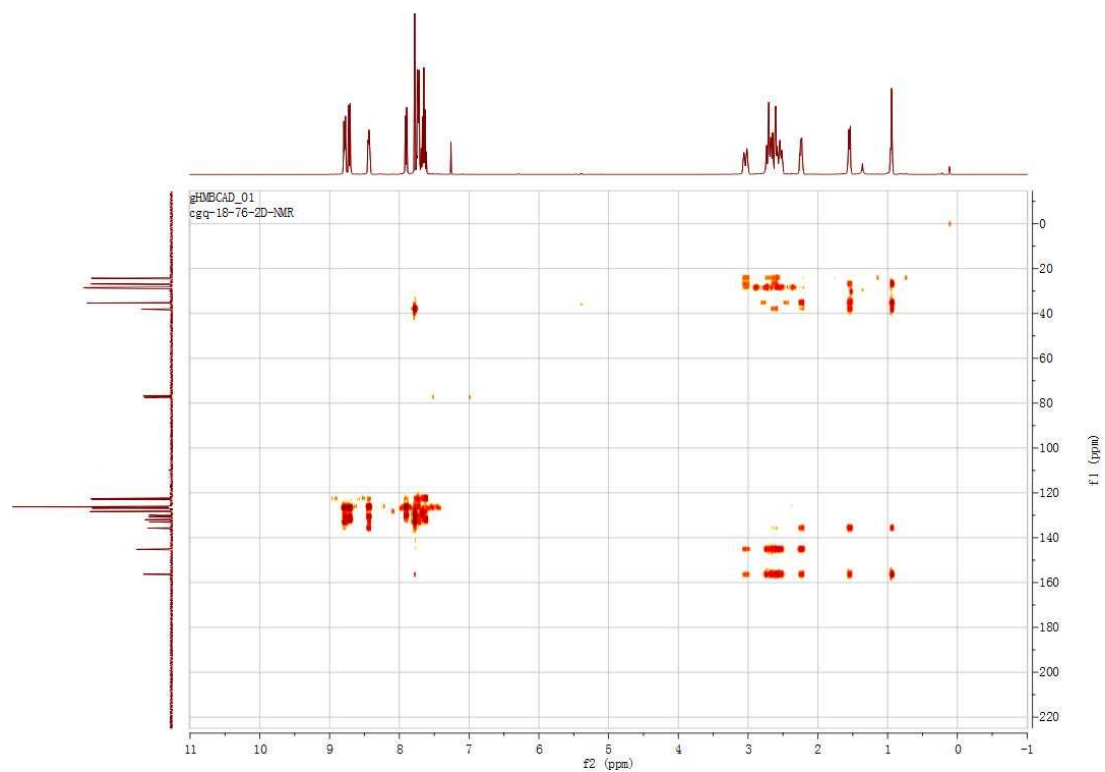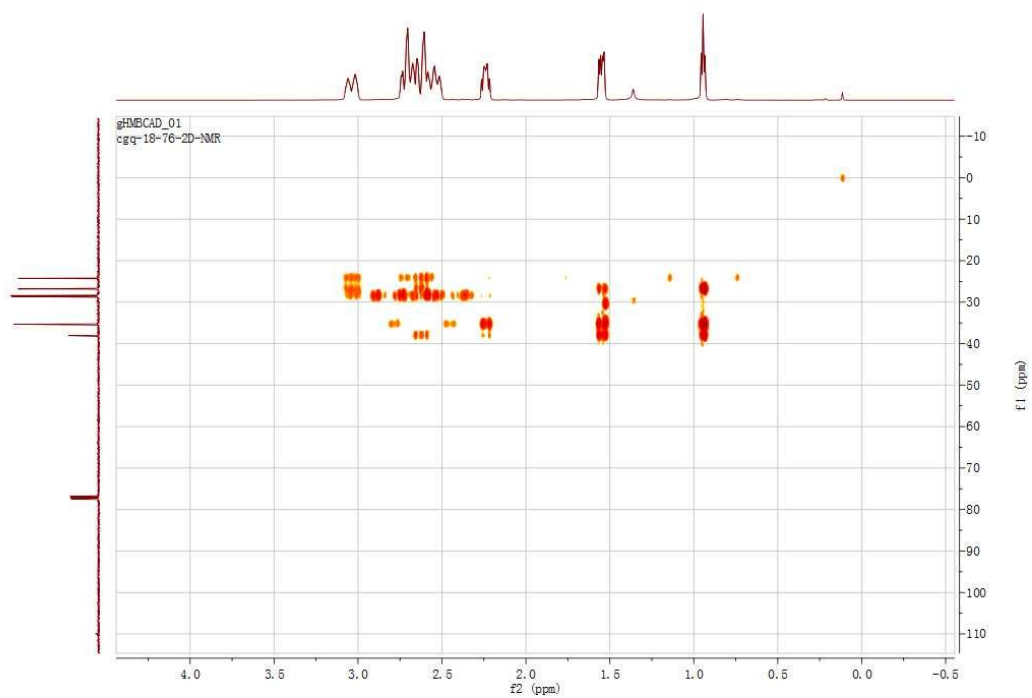

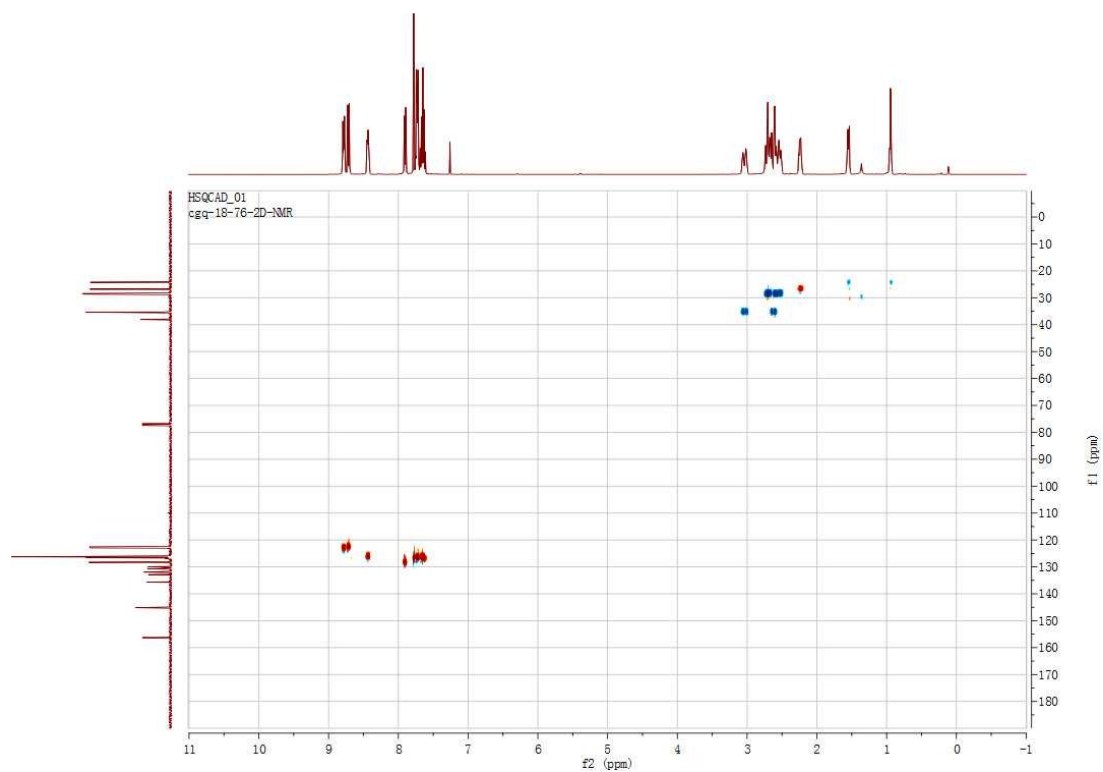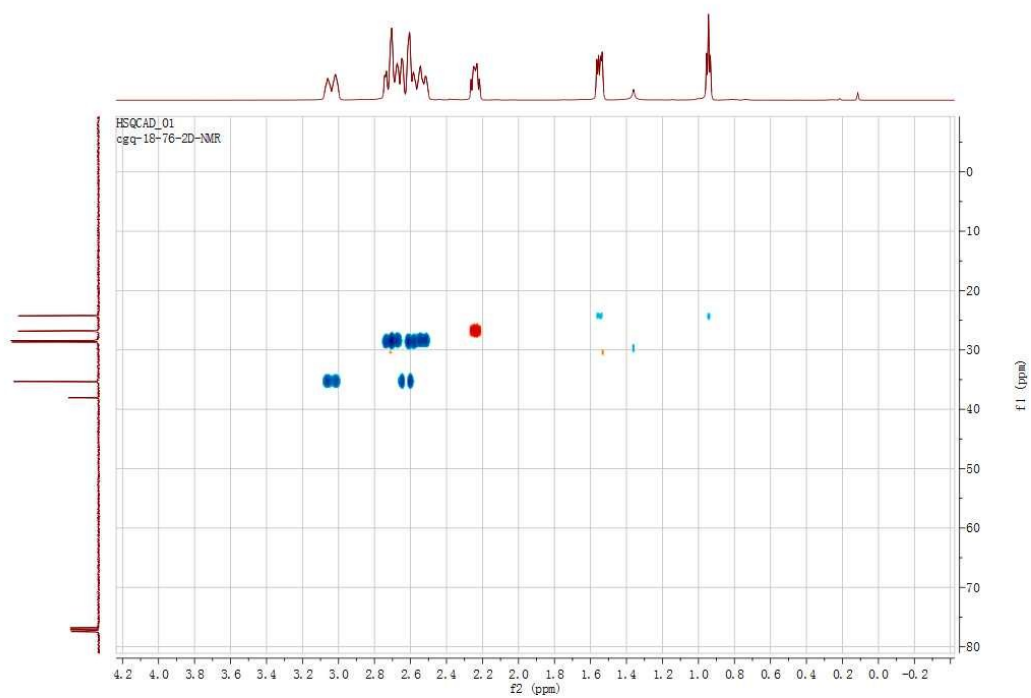

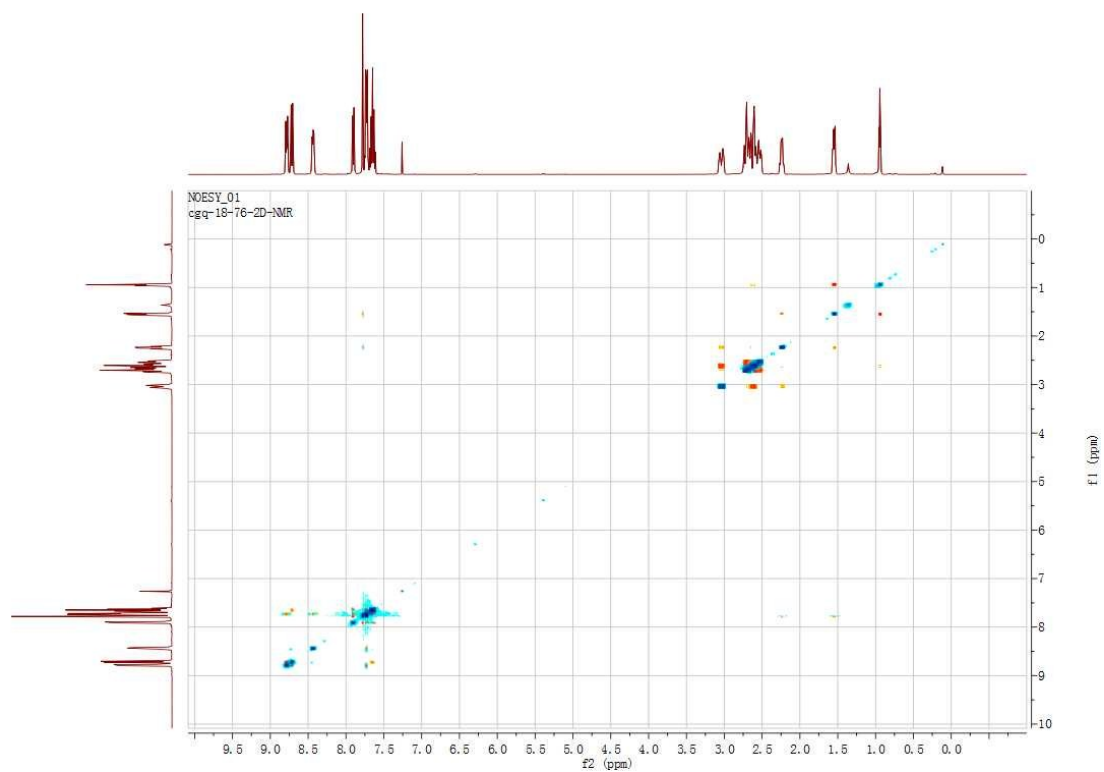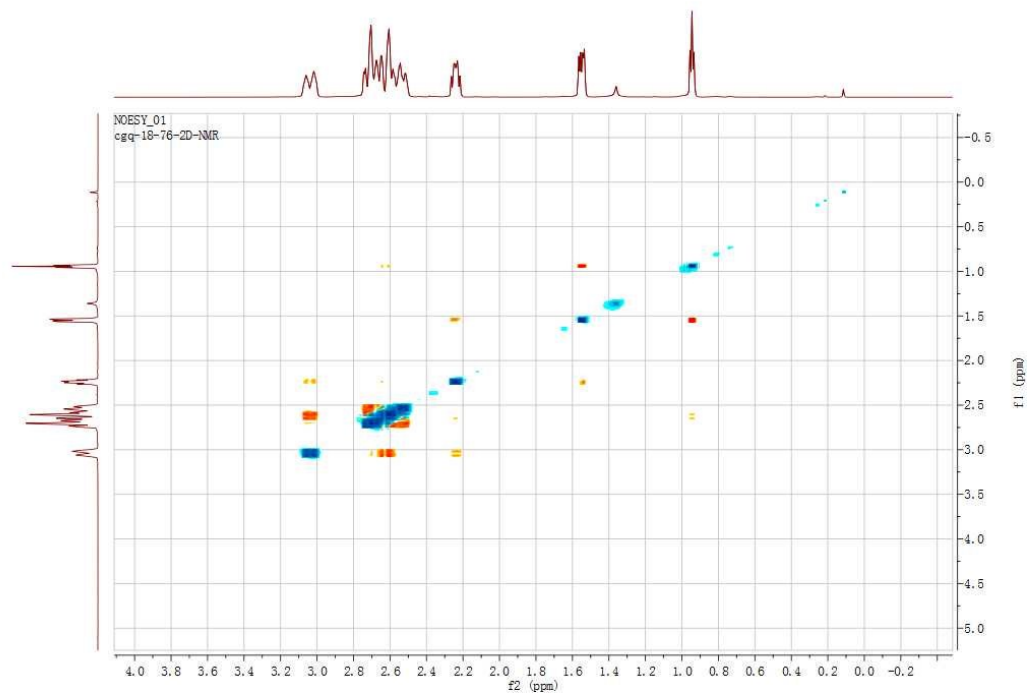

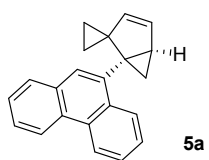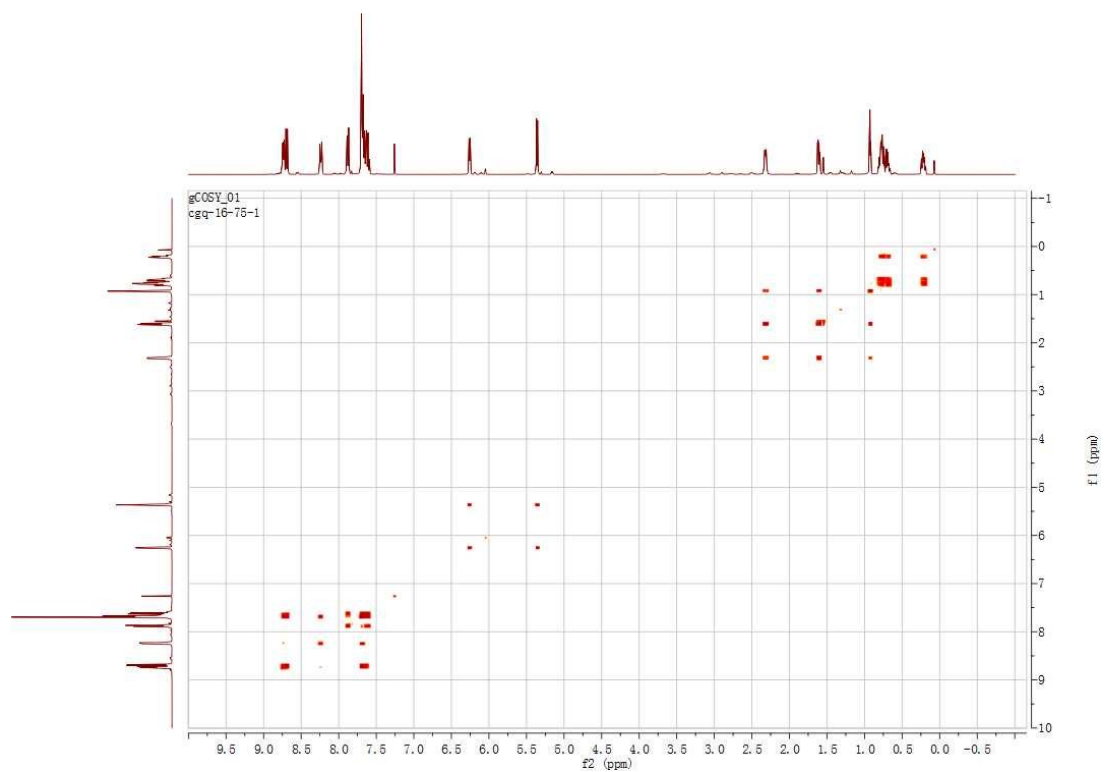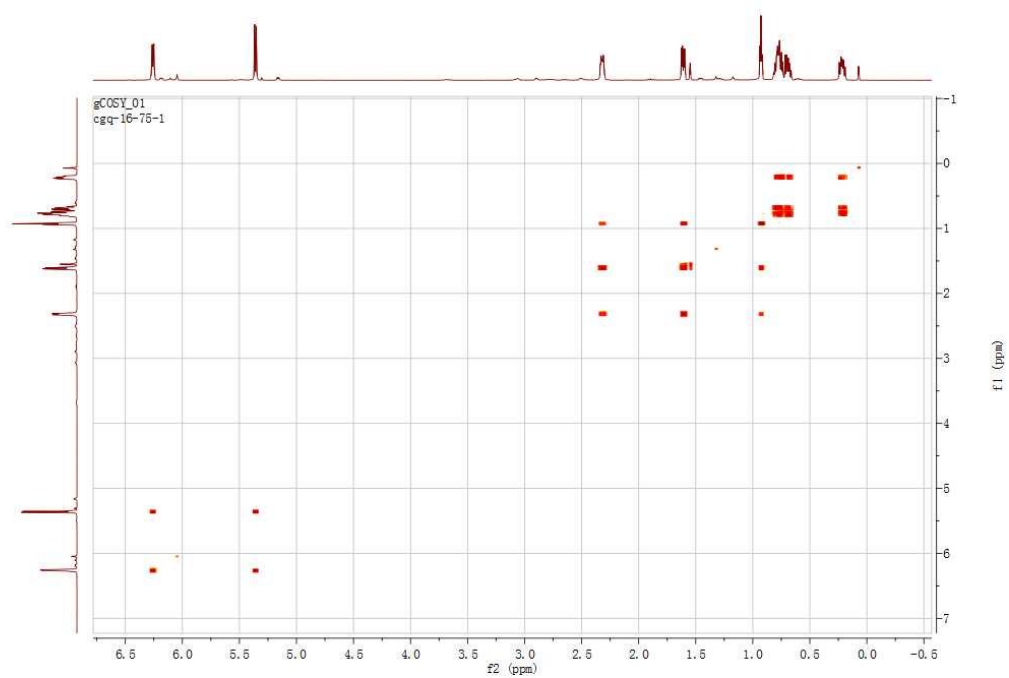

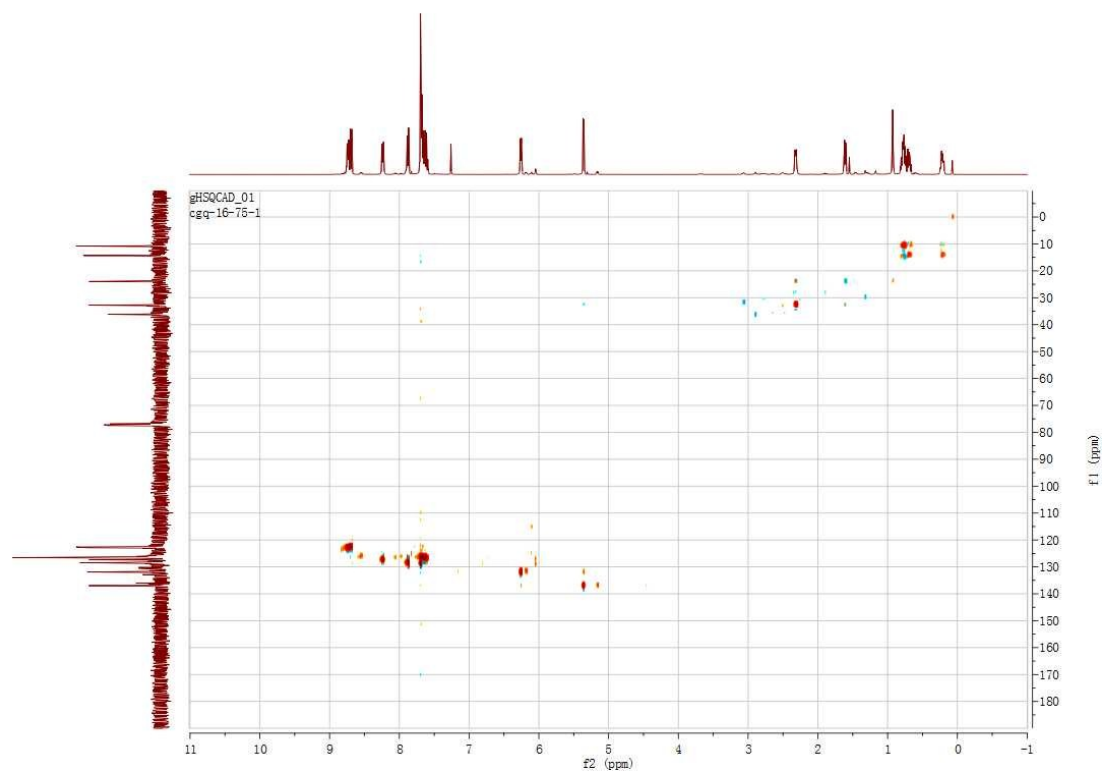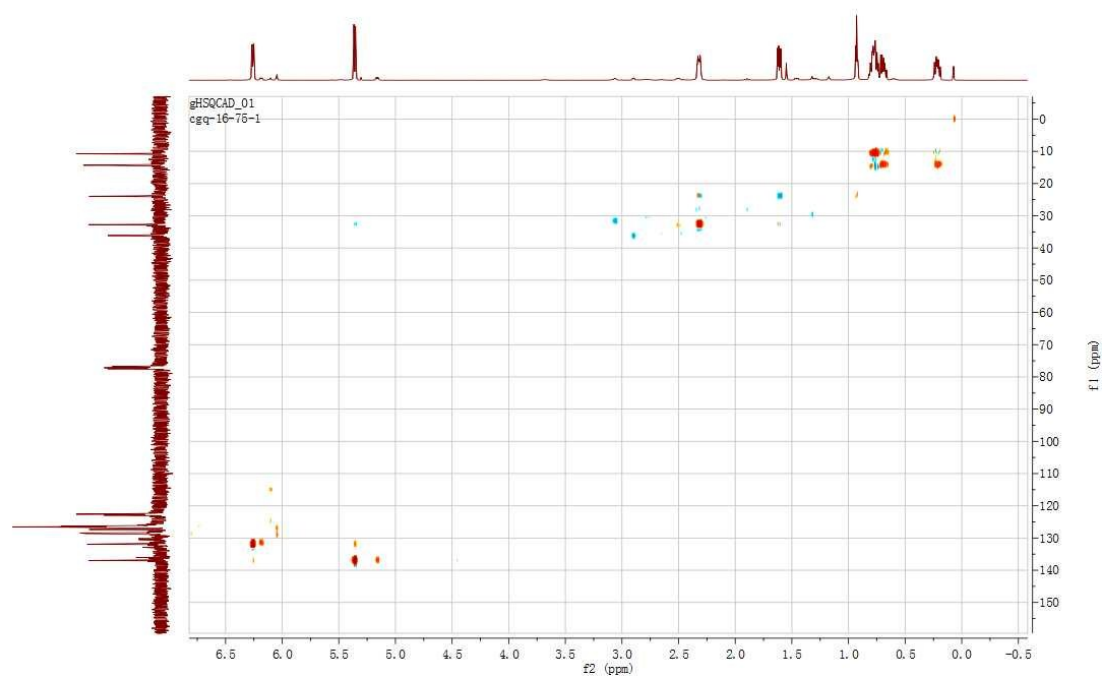

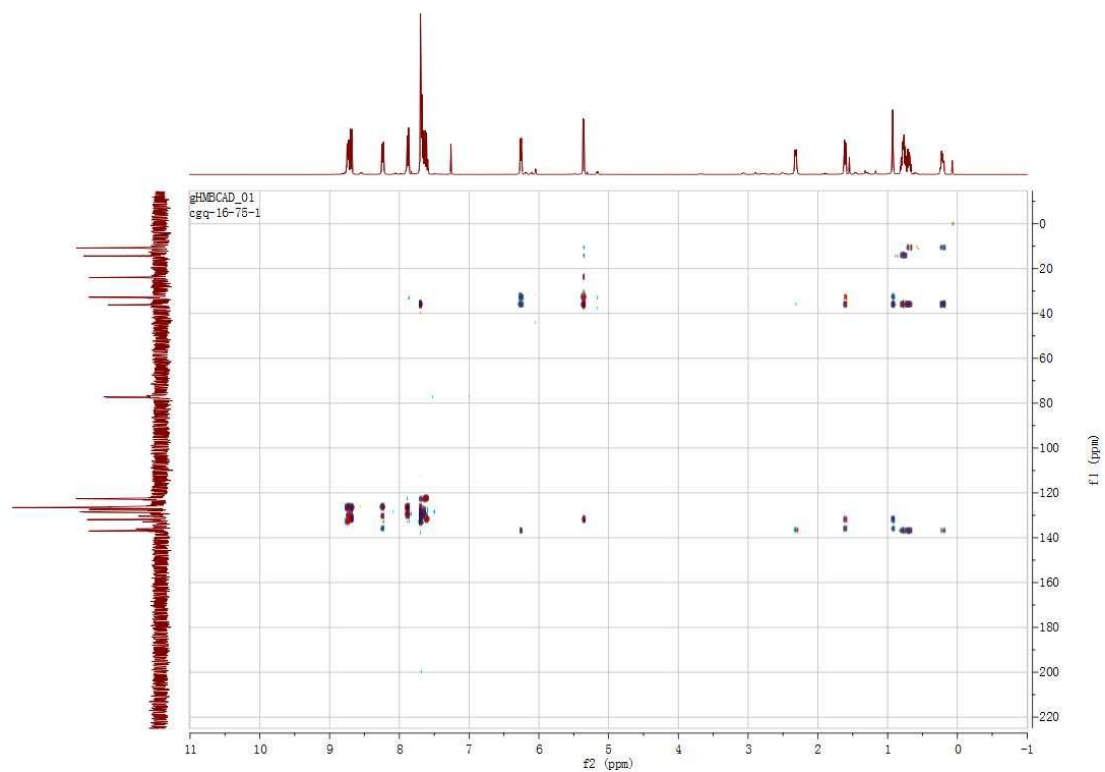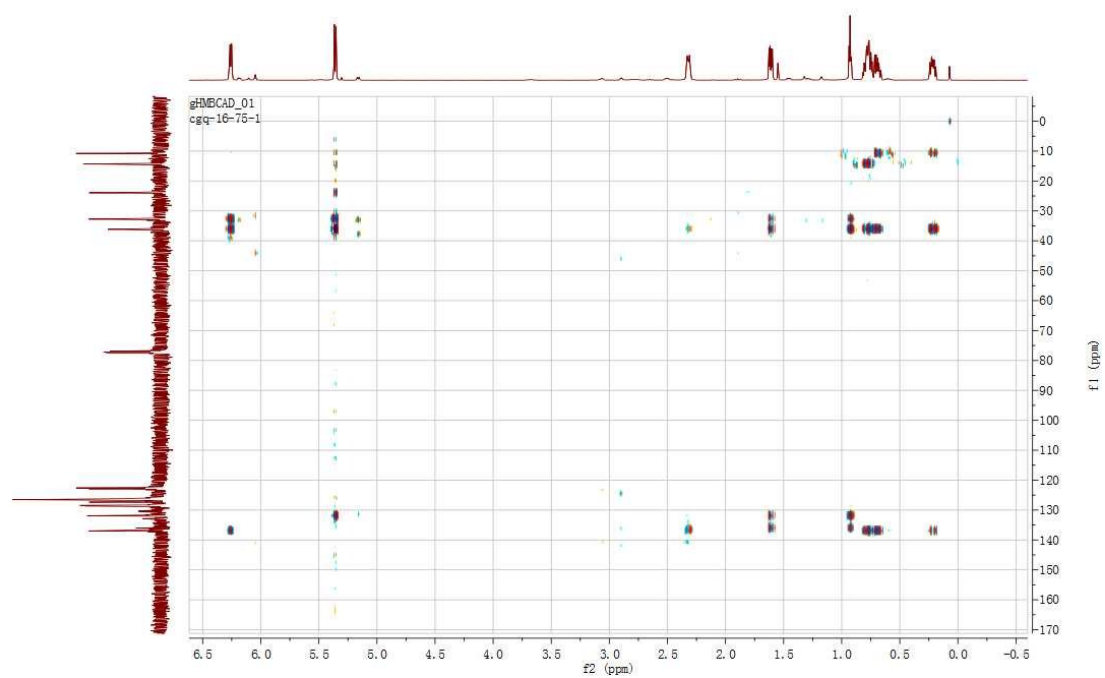

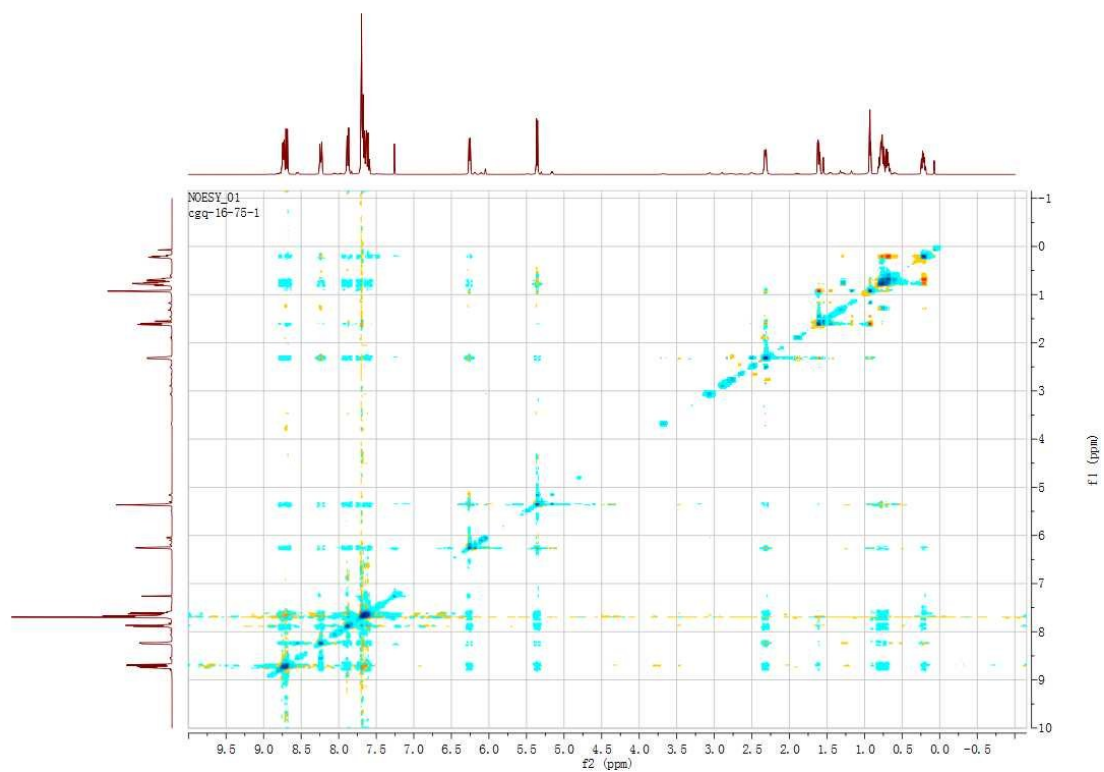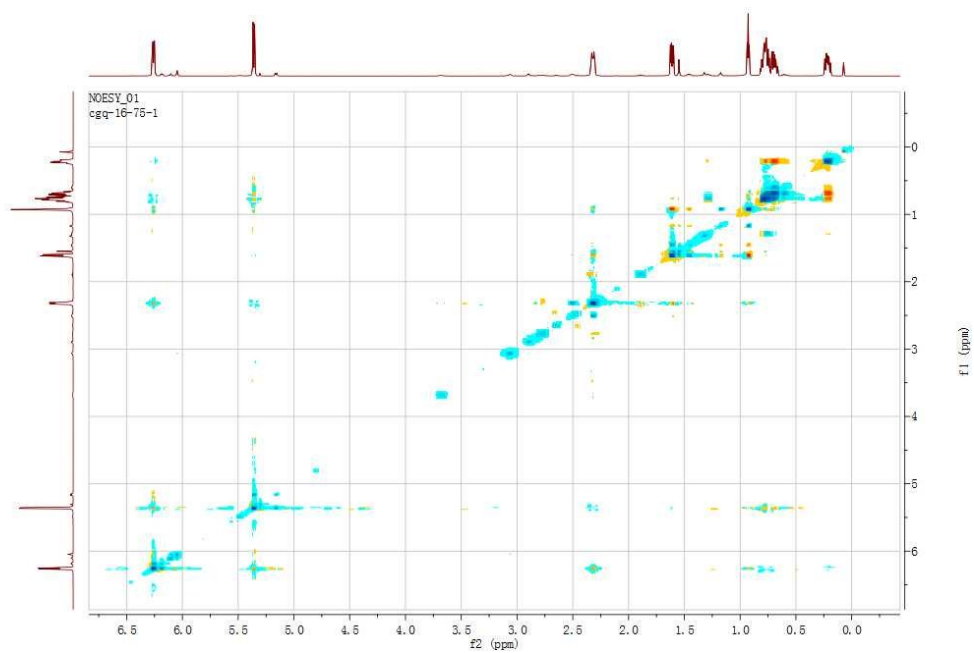

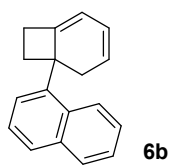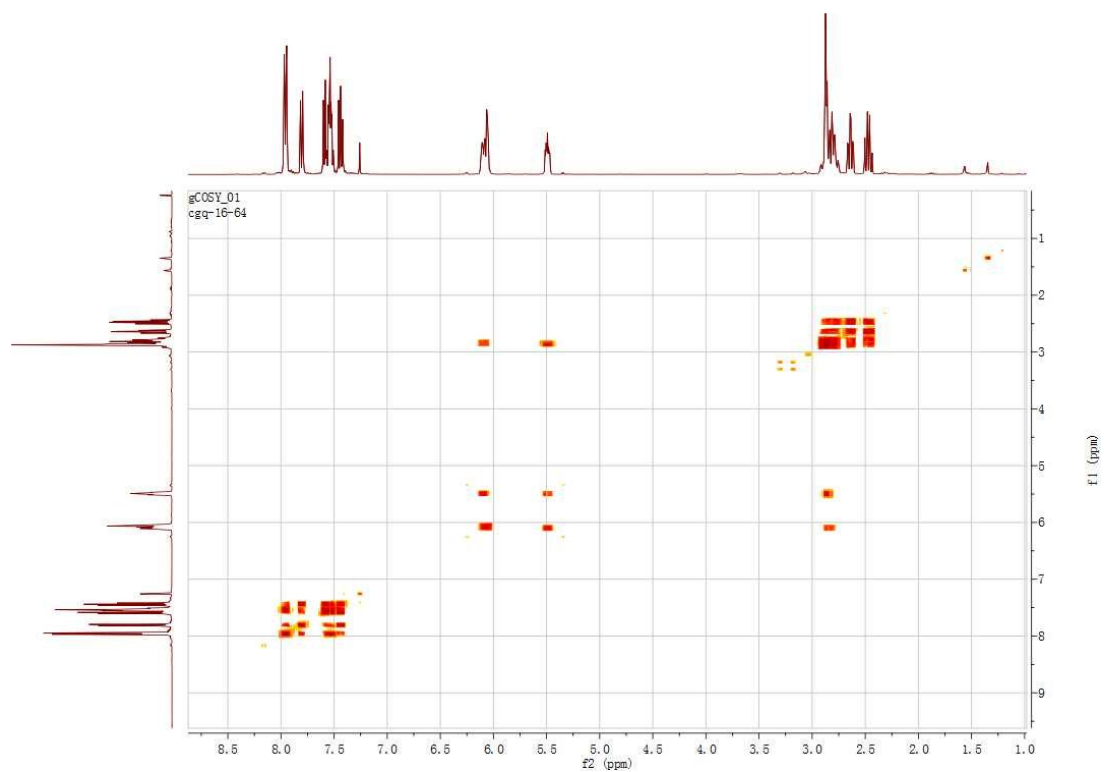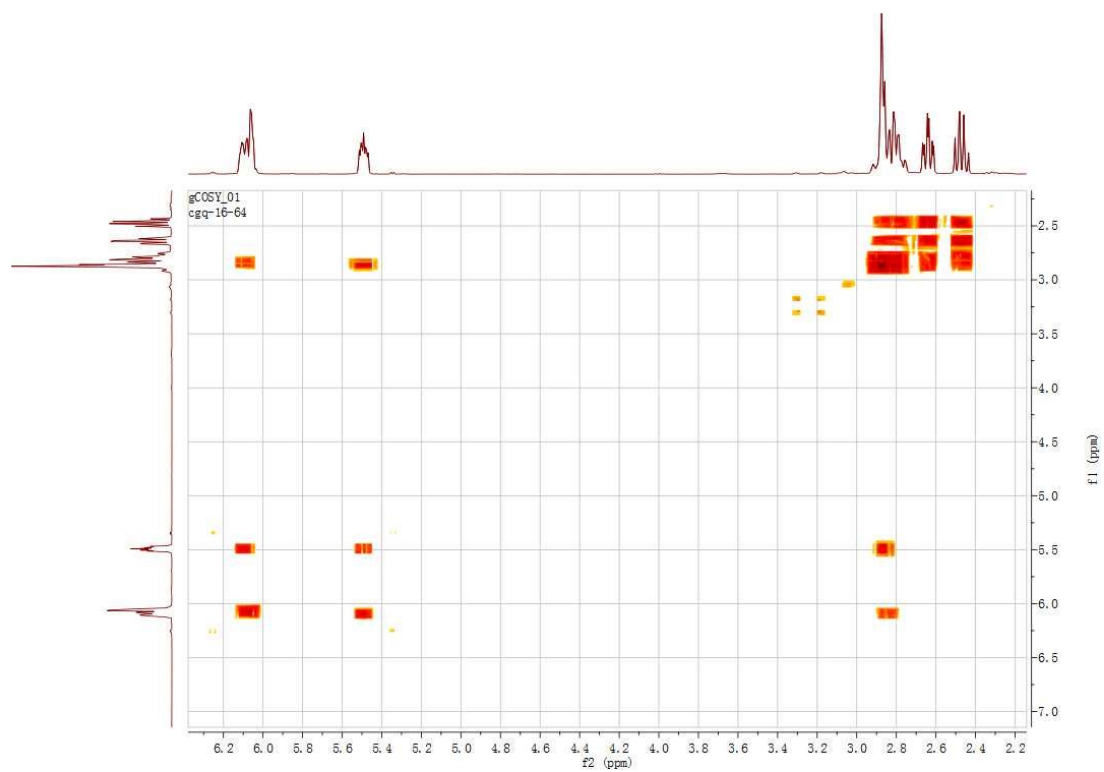

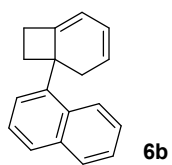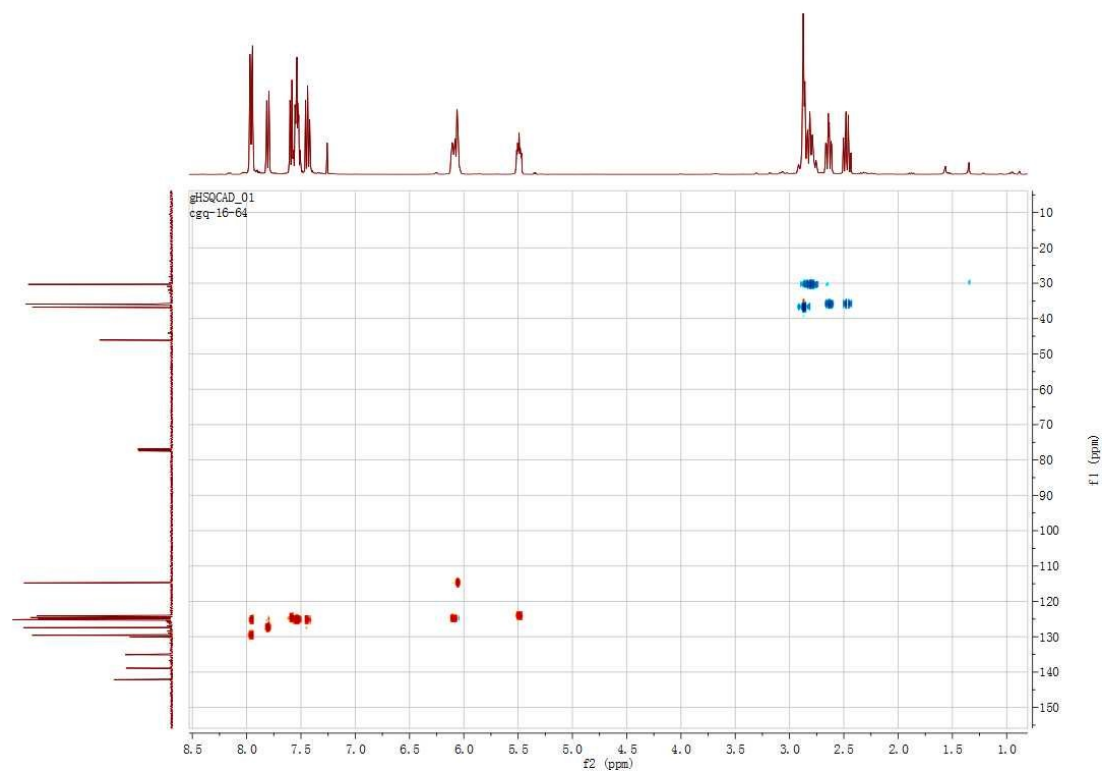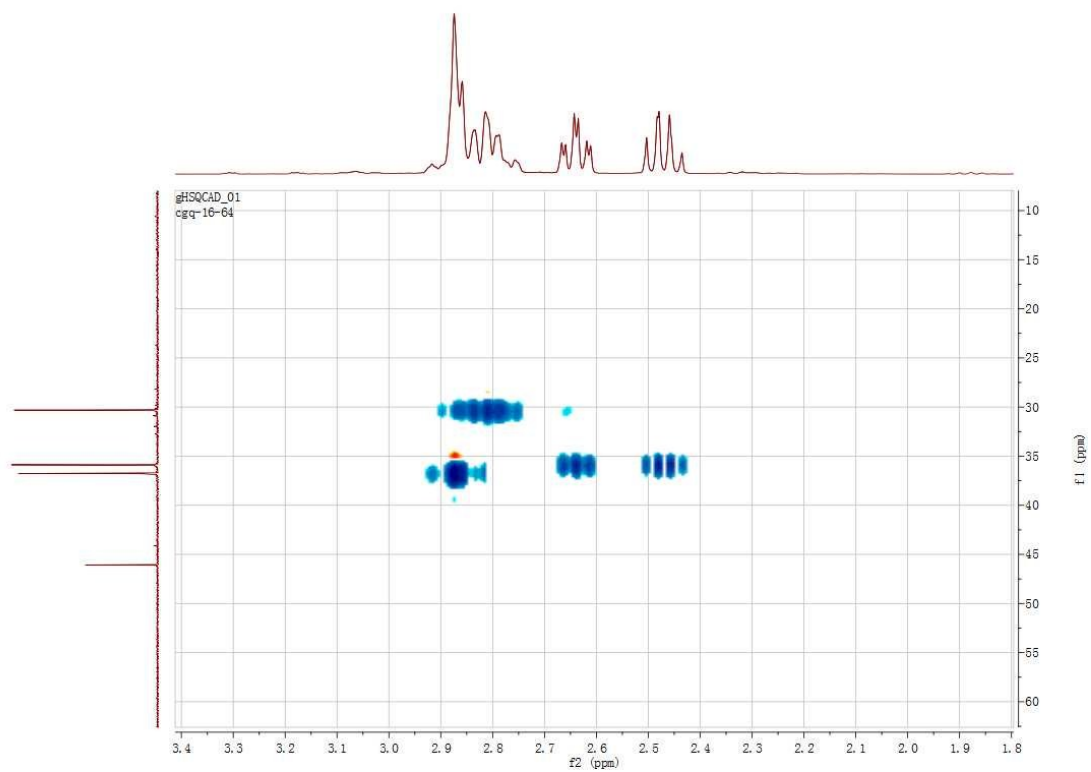

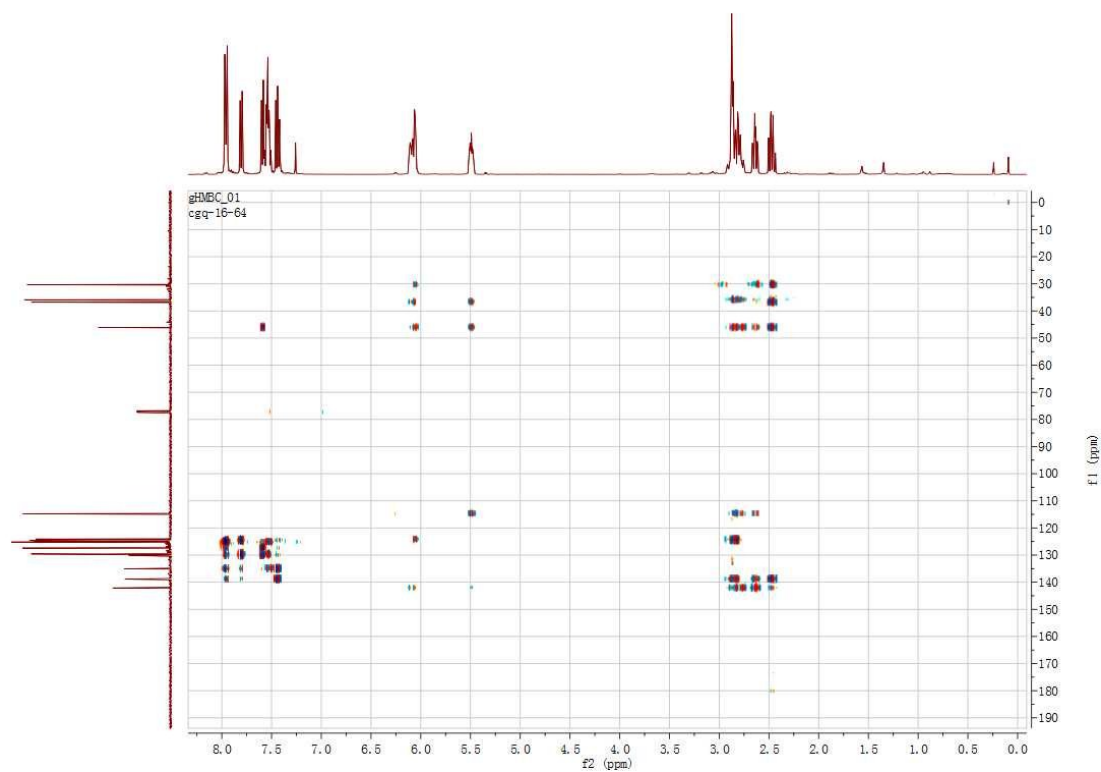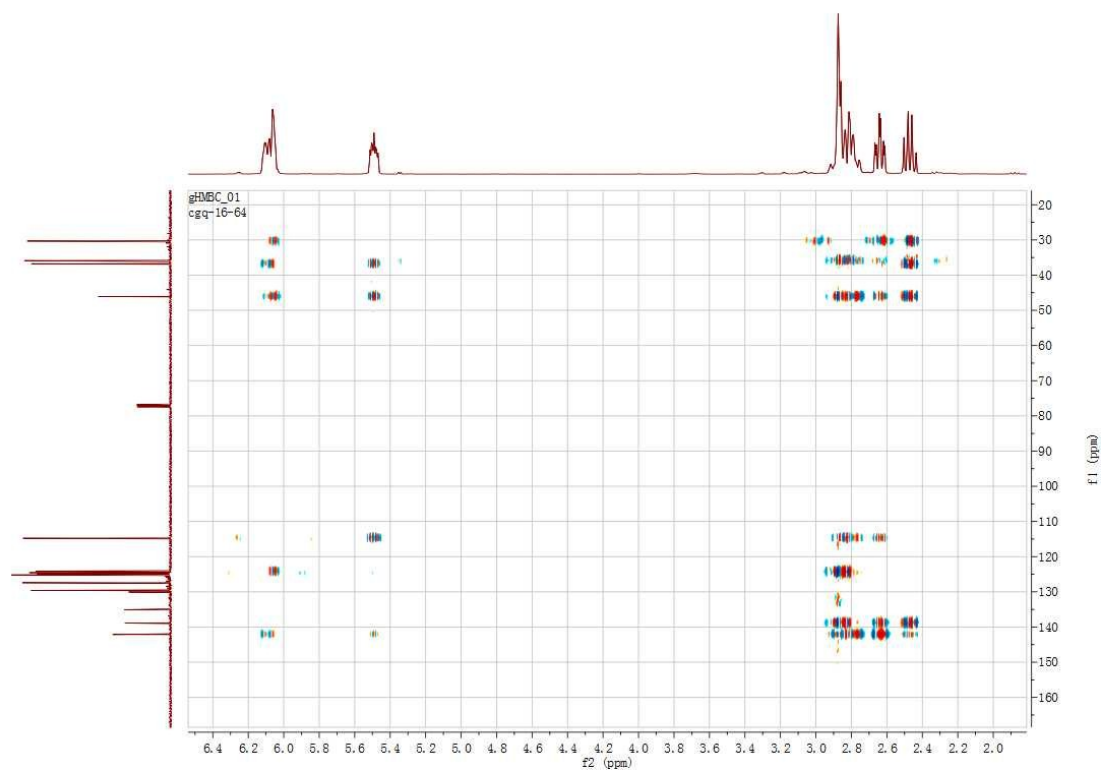

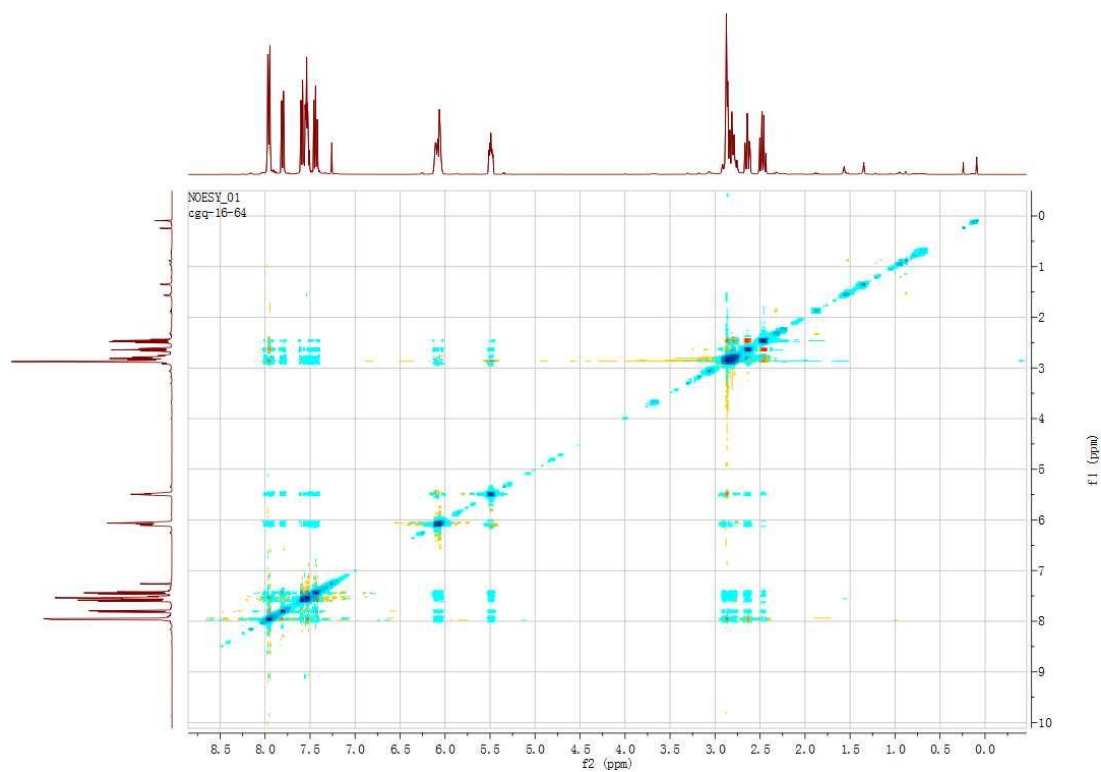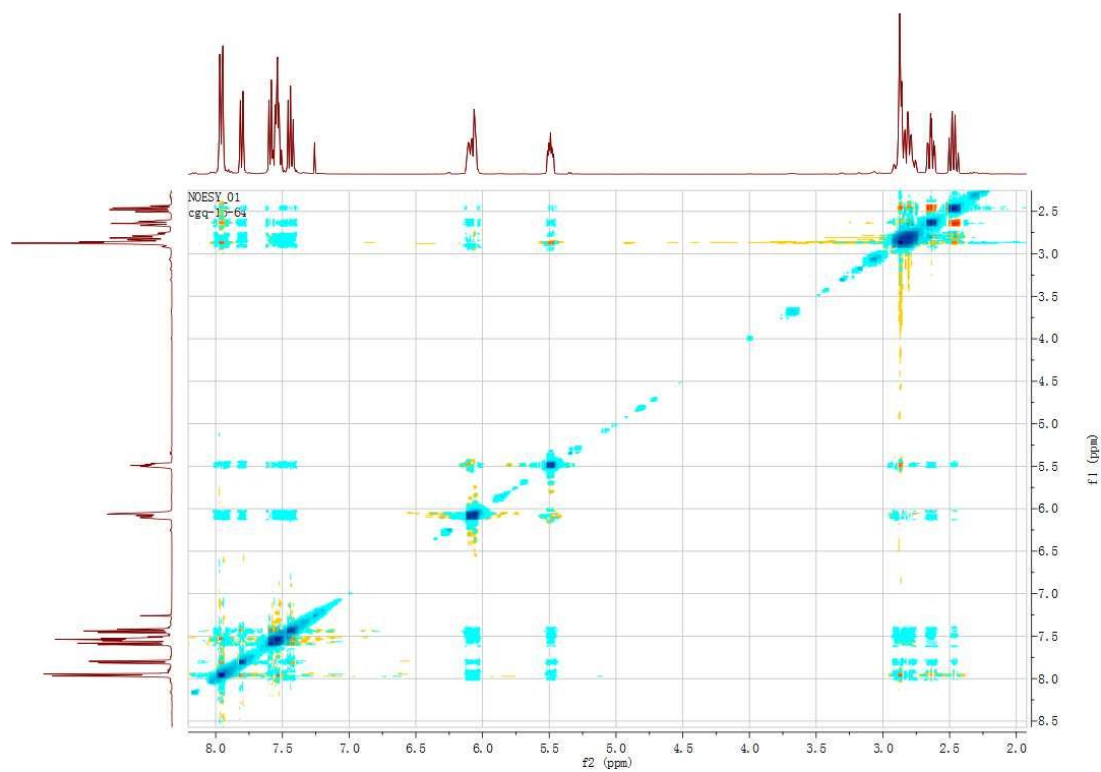

## 11. Three possible routes for the formation of product 3 from 4

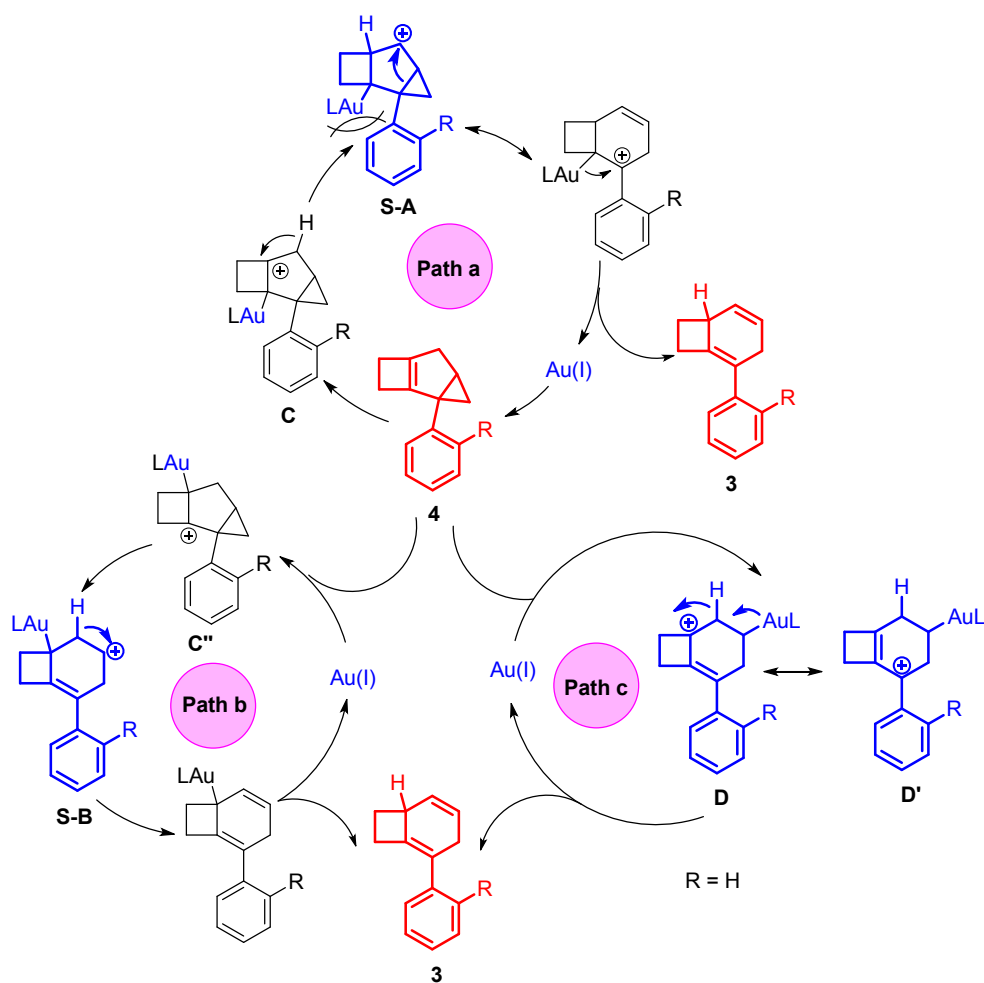

**Scheme S9**

The formation of product **3** was suggested to obtain through the reaction pathway Cycle II depicted in Scheme 7 in the main text of article. Actually, we initially investigated three possible routes to generate **3** as shown in Scheme S9 (Path a, Path b and Path c). The Path b was ruled out based on both the deuterium labeling experiment and theoretical calculations, since this reaction route was conflicted to the deuterium labeling experiment's results and the intermediate **S-B** could not be located theoretically. Both Path a and Path c were in consistence with the deuterium labeling experiment's results. However, the intermediate **S-A** in Path a could not be located theoretically, probably due to the steric hindrance between the ligand and the aryl group. Thus, the Path a was also ruled out. The most possible reaction route Path c is proposed as the Cycle II in Scheme 7.

## 12. Another mechanism for the formation of products **5b** and **6b** through intermediate **4b'**

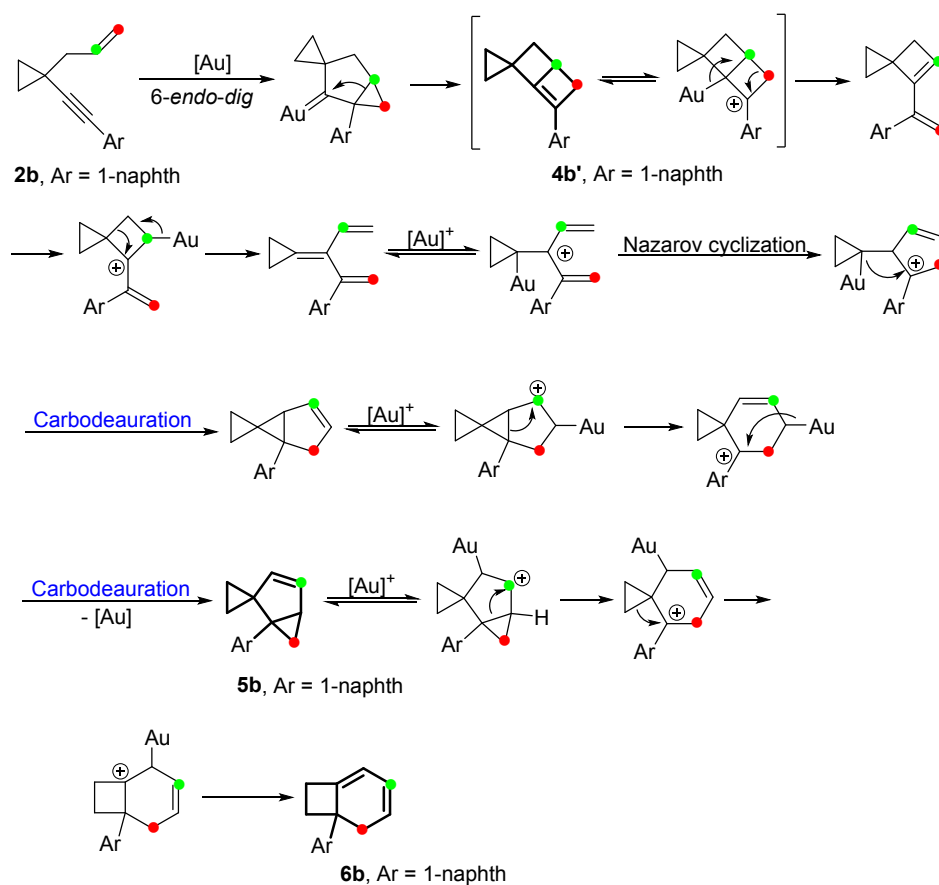

**Scheme S10**

Another mechanism has been initially proposed for the formation of products **5b** and **6b** via intermediate **4b'** that is a constitutional isomer of **4b**. Compounds **4b** and **4b'** have very similar  $^1\text{H}$ -NMR  $^{13}\text{C}$ -NMR and DEPT spectra (**4b'** was formed through a formal intramolecular [2+2] cycloaddition in the presence of gold catalyst. As for gold catalyzed [2+2] cycloaddition, see Obradors, C.; Echavarren, A. M. *Acc. Chem. Res.* **2014**, *47*, 902). However, this mechanism was conflicted to the deuterium labeling experiment's results, and was excluded.

### 13. Computational Details

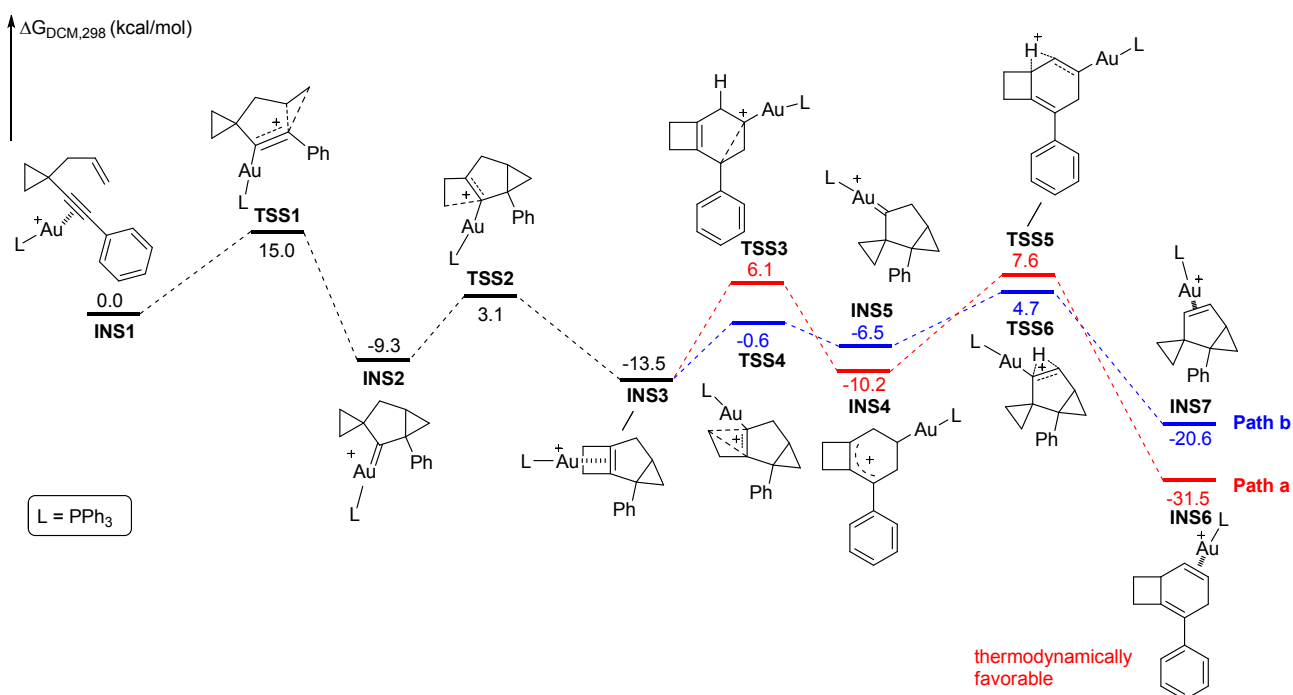

**Scheme S11**

**Table SI-2.** The total energies, enthalpies and free energies of the lowest conformers of all species shown in Scheme 9.

|            | $E_{\text{tot}} (E_h)^a$ | $H_{298}^a$  | $G_{298}^a$  | $G_{\text{DCM}}^b$ |
|------------|--------------------------|--------------|--------------|--------------------|
| <b>IN1</b> | -1795.409664             | -1794.708288 | -1794.823014 | -1794.994258       |
| <b>TS1</b> | -1795.392126             | -1794.691972 | -1794.803445 | -1794.970724       |
| <b>IN2</b> | -1795.440729             | -1794.738231 | -1794.847132 | -1795.014332       |
| <b>TS2</b> | -1795.414112             | -1794.71318  | -1794.819057 | -1794.988891       |
| <b>IN3</b> | -1795.443929             | -1794.740923 | -1794.847150 | -1795.013708       |
| <b>TS3</b> | -1795.416056             | -1794.714296 | -1794.819643 | -1794.985217       |
| <b>IN4</b> | -1795.435591             | -1794.733321 | -1794.846133 | -1795.013995       |
| <b>TS5</b> | -1795.403003             | -1794.703656 | -1794.811670 | -1794.984100       |
| <b>IN6</b> | -1795.470217             | -1794.766305 | -1794.875766 | -1795.048970       |
| <b>TS4</b> | -1795.423112             | -1794.721647 | -1794.829082 | -1794.996887       |
| <b>IN5</b> | -1795.431279             | -1794.729411 | -1794.839255 | -1795.008039       |
| <b>TS6</b> | -1795.405754             | -1794.707289 | -1794.815886 | -1794.989270       |
| <b>IN7</b> | -1795.455216             | -1794.752938 | -1794.861716 | -1795.033181       |

a. Calculated at the PBE1PBE/6-31G(d)/SDD level of theory;

b. SMD/PBE1PBE/6-31+G(d,p)// PBE1PBE/6-31G(d)/SDD

**Table SI-3.** The total energies, enthalpies and free energies of the lowest conformers of all species shown in Scheme 10.

|             | $E_{\text{tot}} (E_h)^a$ | $H_{298}^a$  | $G_{298}^a$  | $G_{\text{DCM}}^b$ |
|-------------|--------------------------|--------------|--------------|--------------------|
| <b>IN8</b>  | -4365.88657              | -4365.193761 | -4365.31192  | -4365.487226       |
| <b>TS7</b>  | -4365.869048             | -4365.177625 | -4365.293935 | -4365.465775       |
| <b>IN9</b>  | -4365.920432             | -4365.226293 | -4365.337504 | -4365.509414       |
| <b>TS8</b>  | -4365.892703             | -4365.199944 | -4365.308291 | -4365.482132       |
| <b>IN10</b> | -4365.923198             | -4365.228481 | -4365.336308 | -4365.502751       |
| <b>TS9</b>  | -4365.890328             | -4365.197297 | -4365.30551  | -4365.471503       |
| <b>IN11</b> | -4365.902778             | -4365.209454 | -4365.324168 | -4365.495742       |
| <b>TS11</b> | -4365.873289             | -4365.182705 | -4365.29489  | -4365.470252       |
| <b>IN13</b> | -4365.947328             | -4365.25206  | -4365.365309 | -4365.541846       |
| <b>TS10</b> | -4365.900291             | -4365.207296 | -4365.317242 | -4365.488422       |
| <b>IN12</b> | -4365.911315             | -4365.217919 | -4365.33054  | -4365.503239       |
| <b>TS12</b> | -4365.88695              | -4365.197103 | -4365.308562 | -4365.483791       |
| <b>IN14</b> | -4365.934205             | -4365.240202 | -4365.351058 | -4365.527037       |

- a. Calculated at the PBE1PBE/6-31G(d)/SDD level of theory;  
b. SMD/PBE1PBE/6-31+G(d,p)// PBE1PBE/6-31G(d)/SDD

**Table SI-4.** The total energies, enthalpies and free energies of the lowest conformers of all species shown in Scheme 11.

|             | $E_{\text{tot}} (E_h)^a$ | $H_{298}^a$  | $G_{298}^a$  | $G_{\text{DCM}}^b$ |
|-------------|--------------------------|--------------|--------------|--------------------|
| <b>IN15</b> | -4405.915598             | -4405.061034 | -4405.197758 | -4406.113513       |
| <b>TS13</b> | -4405.897622             | -4405.043300 | -4405.178294 | -4406.092502       |
| <b>IN16</b> | -4405.947934             | -4405.090951 | -4405.224125 | -4406.144192       |
| <b>TS14</b> | -4405.920048             | -4405.064981 | -4405.193771 | -4406.117400       |
| <b>IN17</b> | -4405.946480             | -4405.088939 | -4405.219469 | -4406.139850       |
| <b>TS15</b> | -4405.913119             | -4405.057331 | -4405.185678 | -4406.104955       |
| <b>IN18</b> | -4405.929729             | -4405.073669 | -4405.208626 | -4406.123733       |
| <b>TS17</b> | -4405.89896              | -4405.045557 | -4405.17826  | -4406.099847       |
| <b>IN20</b> | -4405.973085             | -4405.114907 | -4405.249902 | -4406.173843       |
| <b>TS16</b> | -4405.929699             | -4405.073969 | -4405.206287 | -4406.123981       |
| <b>IN19</b> | -4405.940683             | -4405.084493 | -4405.219073 | -4406.136624       |
| <b>TS18</b> | -4405.914565             | -4405.061783 | -4405.194823 | -4406.113794       |
| <b>IN21</b> | -4405.960543             | -4405.103759 | -4405.236965 | -4406.160204       |

- a. Calculated at the PBE1PBE/6-31G(d)/SDD level of theory;  
b. SMD/PBE1PBE/6-31+G(d,p)// PBE1PBE/6-31G(d)/SDD

## 14. Archive Entries

### IN1

1\1\GINC-SHI\_03\FOpt\RPBE1PBE\GenECP\C34H41Au1P1(1+)\YIN\23-Oct-2015\0  
\\#p genecp pbelpbe opt\\Title Card Required\\1,1\C,0.0005714896,0.001  
0399139,0.000079676\C,0.0006170066,0.0007399565,1.3888709651\C,1.22036  
00898,0.0000096612,2.0857078132\C,2.4319744921,0.0067775983,1.37661818  
6\C,2.418768279,0.0068979458,-0.0120802696\C,1.2061769393,0.005121111,  
-0.7005123255\H,-0.9425921793,-0.0042408482,-0.538022314\H,-0.93297862  
04,-0.0059067642,1.943355819\H,3.3679614031,0.0062594923,1.9275053043\  
H,3.3558826768,0.0053137484,-0.5609203165\H,1.2003516677,0.0043340361,  
-1.7866355809\C,1.2090935389,-0.0323110894,3.5203932691\C,1.0031920735  
, -0.2195554093,4.7317852116\C,0.6696948498,-0.8398470187,5.9985629595\  
C,0.1132773644,-2.2498485132,5.893160184\C,1.4954616693,-2.0443589309,  
6.4124360446\H,-0.003461246,-2.6798941532,4.9033306819\H,-0.684603767,  
-2.4905270731,6.5904807701\H,1.6771133008,-2.1603296157,7.4777407977\H  
,2.3247877317,-2.3276550289,5.7722777931\C,0.0991099639,0.0637863903,7  
.0852785021\H,0.821201374,0.8717987536,7.2810418481\H,0.0210059032,-0.  
5167964599,8.0119345215\C,-1.2433571318,0.6289619884,6.7287509414\H,-1  
.3009197664,1.1786807926,5.7874782476\C,-2.3409179252,0.4879975543,7.4  
69043117\H,-2.3284740018,-0.0543581316,8.4125280132\H,-3.2932501014,0.  
9129877611,7.1651777227\Au,1.9636004901,1.840254092,4.5635877131\P,2.5  
895107697,4.0849107858,4.7501763483\C,1.5854516477,4.8435362616,6.1765  
152317\C,0.176248784,4.2334095326,6.1612600207\C,2.2864672383,4.414337  
7611,7.4720917771\C,1.4450761072,6.3687950404,6.1480758921\H,-0.380886  
5433,4.469148226,5.2504309737\H,0.2013140982,3.1446641736,6.2726113153  
\H,-0.3890183357,4.6398895151,7.0089677082\H,3.2764972874,4.8669446369  
,7.5795598485\H,1.6741435615,4.7314369025,8.3248851424\H,2.3962290664,  
3.3246016956,7.5338341372\H,0.8510091024,6.6719735046,7.0189268411\H,2  
.4007317091,6.8926192162,6.223458624\H,0.914009249,6.7223844172,5.2596  
658676\C,2.2556321958,4.8573031622,3.0495386018\C,3.0149324108,3.98634  
32618,2.0374463672\C,0.7540009007,4.7826525184,2.7537827084\C,2.739563  
1966,6.301963997,2.8902264483\H,4.0883827838,3.9466038933,2.2543936216  
\H,2.6283612815,2.9617096546,1.9996501229\H,2.8942952427,4.424362569,1  
.0387652014\H,0.1755317877,5.4748886671,3.3730683017\H,0.5889998707,5.  
0657261718,1.7071709781\H,0.3551075637,3.7705878772,2.8908358918\H,2.4  
383680935,6.6521651615,1.8952900069\H,2.3030130832,6.9883479791,3.6202  
538945\H,3.8288654175,6.3760554962,2.9426486831\C,4.3685035683,4.38720  
20648,5.0931326474\C,5.3440885017,3.3670798782,5.1365792383\C,4.785772  
5122,5.7194912463,5.2619785029\C,6.6882762013,3.7278688298,5.310521135  
1\C,5.0923542958,1.9007623111,5.0494422511\C,6.1193787784,6.0538621482  
,5.4550330571\H,4.0589422223,6.5214781039,5.2285078133\C,7.0807583749,  
5.0497479391,5.4688021497\H,7.4320544224,2.9366520796,5.341127922\C,4.  
6107306312,1.1946789742,6.1606455788\C,5.5107210833,1.1819849657,3.923  
8115227\H,6.4018963639,7.0941807944,5.5857970029\H,8.130066646,5.29145

668,5.6103315668\C,4.552909993,-0.1973228104,6.1445053628\H,4.32989765  
 23,1.7405626518,7.0578774629\C,5.4429646434,-0.2100438753,3.9055333229  
 \H,5.9154007451,1.7188230166,3.0693796357\C,4.9676929973,-0.9028220665  
 ,5.0166774747\H,4.2051610132,-0.7300506955,7.0249883846\H,5.7917097936  
 ,-0.7555043094,3.0324491743\H,4.944616169,-1.9891078569,5.0115404877\\  
 Version=EM64L-G09RevA.01\State=1-A\HF=-1795.4096634\RMSD=4.756e-09\RMS  
 F=2.557e-06\Dipole=0.0274845,0.4029217,-0.3283401\Quadrupole=-4.617804  
 9,6.0655122,-1.4477073,9.2296413,-0.1752284,2.772039\PG=C01 [X(C34H41A  
 u1P1)]\@

# TS1

1\1\GINC-SHI\_02\FTS\RPBE1PBE\GenECP\C34H41Au1P1(1+)\YIN\13-Jul-2015\0\  
 \#p opt=(calcf,ts,noeigen) genecp pbelpbe\\Title Card Required\\1,1\C  
 ,2.0974561632,-3.1275037314,-1.3852536549\C,2.950278396,-2.0191255015,  
 -0.8180002263\C,2.5741618598,-3.233165749,0.0210731168\H,1.0485208571,  
 -2.9109258899,-1.5629810084\H,2.5650321163,-3.7586701758,-2.136807551\  
 H,3.3693060348,-3.9387489485,0.247100827\H,1.8590703176,-3.0749010657,  
 0.8223862311\C,2.3609878281,-0.7186208667,-0.4355397271\C,3.028547909,  
 0.3270784561,-0.0672768044\C,3.153579802,1.7406858089,0.1562564638\C,3  
 .313236656,2.2597792828,1.4525910902\C,3.1105088417,2.62142811,-0.9391  
 927343\C,3.409189245,3.63035478,1.6482600455\C,3.2088461192,3.99187503  
 02,-0.7363363696\H,2.996971478,2.2159446124,-1.9403648839\C,3.35765427  
 42,4.4963797826,0.5551387883\H,3.1747087844,4.66840314,-1.5851505143\H  
 ,3.4394451373,5.5682770029,0.7109923519\C,4.3629479927,-1.8762780681,-  
 1.388863407\H,4.305506543,-1.7069080569,-2.4700431509\H,4.9089639322,-  
 2.8199122924,-1.2480074666\C,5.1057654565,-0.7541415866,-0.7476800824\  
 C,5.0206585733,-0.4916919856,0.578755376\H,5.6833662456,-0.0856718411,  
 -1.3831367026\H,5.5509668146,0.3482666846,1.0169653339\H,4.5452204771,  
 -1.1883004232,1.2644314002\Au,0.307820317,-0.277030939,-0.418062749\H,  
 3.3565765922,1.5765286449,2.2956214101\H,3.5285461935,4.0277601101,2.6  
 517977269\P,-1.9550026171,0.2343791669,-0.783414308\C,-3.0829889636,0.  
 1319943416,0.6650095242\C,-4.420492834,0.530554763,0.4925967607\C,-2.6  
 860843254,-0.3521649378,1.9297184719\C,-5.3501406643,0.454762956,1.520  
 7950824\H,-4.7517492671,0.9019464915,-0.4689213573\C,-3.643199645,-0.4  
 348751016,2.9518382234\C,-4.9595440928,-0.0384303036,2.7606351026\H,-6  
 .3734320246,0.775216691,1.3487843395\H,-3.3280100704,-0.8120230652,3.9  
 206539241\H,-5.6730414841,-0.1109704037,3.5762866493\C,-2.6147259694,-  
 1.0411210061,-2.0211273237\C,-1.81005947,-0.9300354158,-3.3210324895\C  
 ,-2.3509744186,-2.4083309043,-1.3731926001\C,-4.1109531053,-0.95071229  
 11,-2.3358581316\H,-2.05344702,-0.0216692969,-3.8813879198\H,-0.728620  
 8335,-0.9479894744,-3.1398980362\H,-2.0571094939,-1.7836595799,-3.9642  
 620126\H,-2.8942446719,-2.5199932193,-0.4283906505\H,-2.6981223237,-3.  
 1966723916,-2.0526927599\H,-1.285557905,-2.5741116368,-1.1777901056\H,  
 -4.3483634609,-1.7169117,-3.084334496\H,-4.7268271971,-1.1569779276,-1

.4565342602\H,-4.4074000111,0.0138745075,-2.7558645989\C,-2.005276937,  
2.0339462845,-1.406808299\C,-1.8846732909,2.9206440189,-0.1604128094\C  
,-0.7731455873,2.2761276603,-2.2919390991\C,-3.2482000044,2.4323055581  
,-2.2086198921\H,-2.7652511238,2.8528649013,0.4850338515\H,-0.99842493  
26,2.6644378189,0.4332763873\H,-1.7781972872,3.9650691048,-0.478791184  
7\H,-0.7579836552,1.6405037213,-3.1817825498\H,-0.7879471417,3.3199028  
169,-2.6304116465\H,0.1590560928,2.1147205452,-1.740058377\H,-3.146567  
4709,3.4859618255,-2.4970698331\H,-3.3493019518,1.8553957996,-3.132538  
587\H,-4.1763523669,2.3520764384,-1.6384308922\C,-1.312232493,-0.78297  
56933,2.3224353585\C,-0.3826659418,0.1551639423,2.7885369455\C,-1.0030  
129361,-2.1444560165,2.419248961\C,0.8250965185,-0.2616027046,3.343569  
2184\H,-0.6283088199,1.2135533211,2.7521416089\C,0.2081892977,-2.55940  
97748,2.9692511973\H,-1.7301206981,-2.8819111647,2.0890302946\C,1.1233  
873782,-1.6189694802,3.4375599691\H,1.5198678238,0.4783953956,3.731532  
9371\H,0.4219048673,-3.6213485061,3.059097801\H,2.0541595721,-1.944275  
398,3.894353483\\Version=EM64L-G09RevA.01\State=1-A\HF=-1795.3921256\R  
MSD=4.540e-09\RMSF=1.104e-06\Dipole=1.1095237,0.5432801,-0.2446746\Qua  
drupole=21.6636025,-6.6566853,-15.0069172,0.5301328,1.414571,-0.091380  
9\PG=C01 [X(C34H41Au1P1)]\@

## IN2

1\1\GINC-SHI\_02\FOpt\RPBE1PBE\GenECP\C34H41Au1P1(1+)\YIN\15-Jul-2015\0  
\\#p opt genecp pbelpbe\\Title Card Required\\1,1\C,-0.1211430953,0.18  
63330348,-0.0339520303\C,0.2199108748,0.1160324905,1.4690479802\C,1.26  
99592943,-0.0552281379,0.3404705102\H,-0.7147085136,-0.633273899,-0.42  
70368217\H,-0.4122169438,1.1804117235,-0.3626824484\H,1.9803231992,0.7  
647628179,0.2822553083\H,1.6890020435,-1.0499523815,0.2259223906\C,-0.  
160308074,-1.0580104706,2.2121369109\C,-0.3186579549,-0.7028242691,3.6  
066327343\C,-1.2111793538,-1.4722993588,4.523477195\C,-0.715207493,-2.  
4944556424,5.3374942504\C,-2.5776675268,-1.1780695867,4.5587073554\C,-  
1.5694757269,-3.2108582336,6.1715306316\C,-3.4320569675,-1.8904584837,  
5.3959562986\H,-2.9704041471,-0.3789012411,3.9344214834\C,-2.929269841  
1,-2.908518093,6.2031873696\H,-4.4899342919,-1.6449766819,5.4230719502  
\H,-3.5939184014,-3.4586165355,6.8632014392\C,0.1221405317,1.372949716  
6,2.335371081\H,-0.7491740592,1.9716796895,2.0470126373\H,1.0075737053  
,2.0139068716,2.2534315273\C,-0.0413340146,0.8221363419,3.7332414485\C  
,1.004014606,-0.1106917426,4.1700301655\H,-0.6002937347,1.3751430239,4  
.4820462607\H,1.1162307395,-0.3009883893,5.2337931284\H,1.9077880676,-  
0.2290267526,3.5779671088\Au,-0.5076794531,-2.9231973662,1.5004168755\H,  
0.3473441012,-2.7257994445,5.3195308817\H,-1.1712903201,-3.997393011  
7,6.8065650175\H,-1.2640740126,-5.0024391984,0.6300151252\C,0.00909753  
73,-6.3108659204,0.4043870557\C,-0.4136794783,-7.579540387,-0.02868537  
27\C,1.3936106745,-6.0869671209,0.5703012309\C,0.4847778074,-8.5999671  
863,-0.3105198739\H,-1.4698390232,-7.7771400701,-0.1633931702\C,2.2870  
577075,-7.122162891,0.2561719639\C,1.8487230843,-8.3648788784,-0.17933

30047\H,0.1178401803,-9.5679790801,-0.6385676931\H,3.3503929959,-6.940  
6238819,0.3854824579\H,2.5684589841,-9.1465615054,-0.4041192042\C,-1.9  
197979346,-4.6487591552,-1.1130072058\C,-3.0921228345,-3.6670874226,-1  
.0048821018\C,-0.7597265133,-3.9686555067,-1.8559456463\C,-2.347901596  
2,-5.8745219872,-1.9249073215\H,-3.9875833696,-4.1350729567,-0.5843334  
372\H,-2.8394114257,-2.7914989978,-0.394728863\H,-3.3517933213,-3.3128  
423939,-2.010190017\H,0.1177959892,-4.6207865151,-1.9268613511\H,-1.08  
26146337,-3.7323781366,-2.8775923774\H,-0.4543531045,-3.0339066348,-1.  
371472829\H,-2.7319890634,-5.5266670031,-2.8920430193\H,-1.5064083893,  
-6.5411312036,-2.1319891577\H,-3.1452005053,-6.4508958539,-1.448864740  
8\C,-2.5759531231,-5.6752273136,1.8330557952\C,-1.8082259792,-6.345324  
5588,2.9800609609\C,-3.3543530771,-4.4822213913,2.4094480097\C,-3.5855  
819975,-6.6620229291,1.2393402452\H,-1.2731312059,-7.2433812919,2.6575  
431724\H,-1.0896451183,-5.6566109894,3.4406566432\H,-2.5237237139,-6.6  
3798833,3.7583133283\H,-3.903670298,-3.9254557705,1.6449076762\H,-4.08  
80652724,-4.8620271503,3.1315937073\H,-2.7013760525,-3.7816015942,2.94  
07354697\H,-4.2752952962,-6.9668492772,2.0362524953\H,-4.1907954426,-6  
.2119866025,0.4470997542\H,-3.1262698281,-7.5757627743,0.8549959901\C,  
2.0298106323,-4.8474161663,1.0984564606\C,1.9622165464,-4.5336836686,2  
.4633624639\C,2.8619211033,-4.0808038772,0.2734093346\C,2.7200895776,-  
3.4879048589,2.9890167319\H,1.3553598607,-5.1495715639,3.1221455971\C,  
3.611853624,-3.0305833779,0.7985147718\H,2.9402505868,-4.3302766066,-0  
.7817757491\C,3.5483645049,-2.735792147,2.1591395341\H,2.6838143667,-3  
.2823411657,4.0557099843\H,4.2697131724,-2.4612866479,0.1469814476\H,4  
.1619609291,-1.9403549669,2.5738414419\\Version=EM64L-G09RevA.01\State  
=1-A\HF=-1795.4407311\RMSD=9.478e-09\RMSF=2.618e-06\Dipole=0.1231742,0  
.8609439,-0.1654766\Quadrupole=-7.7245501,15.8057793,-8.0812291,6.7538  
079,-2.8313835,9.4342118\PG=C01 [X(C34H41Au1P1)]\@

## TS2

1\1\GINC-SHI\_03\FTS\RPBE1PBE\GenECP\C34H41Au1P1(1+)\YIN\18-Jul-2015\0\  
\#p opt=(calcf,ts,noeigen) genecp pbelpbe\\Title Card Required\\1,1\C  
,-2.4430787195,-0.724928238,-2.4950075297\C,-1.9923516075,-2.162072863  
4,-2.8278789747\H,-3.4627719704,-0.5068927484,-2.8073332518\H,-1.75425  
93365,0.0773201032,-2.750122568\H,-0.9089686931,-2.2415208389,-2.89832  
6585\H,-2.5103285146,-2.7052456602,-3.6168898214\C,-2.5677747281,-2.24  
72748038,-1.4781687709\C,-3.8138419441,-2.9339245573,-1.0172730206\C,-  
4.3526562179,-2.0193738446,0.0642525646\H,-3.5168287658,-3.9231726539,  
-0.6355097922\H,-4.5123161443,-3.1259455275,-1.8423440368\C,-3.4116165  
468,-0.8169930079,0.1909039189\C,-4.810626571,-0.6646128529,-0.3652804  
105\H,-4.9626523235,-0.4618843862,-1.4230440532\H,-5.5186365045,-0.158  
004293,0.2841319534\C,-2.2916104609,-1.0317774729,-0.8180108763\Au,-0.  
3132176201,-0.5098459489,-0.2737747762\H,-4.8055332999,-2.464516275,0.  
9441402471\C,-3.1067204148,-0.1778860184,1.5097966139\C,-3.1152857916,

-0.9100106893,2.6985469105\C,-2.8275565642,1.1929757911,1.5679281286\C  
 ,-2.8548010137,-0.288919489,3.9195264514\H,-3.3293560721,-1.9755119095  
 ,2.6735032679\C,-2.5601830795,1.8141466085,2.7836915318\H,-2.836750088  
 2,1.7745522267,0.6494380756\C,-2.5748372234,1.0732393641,3.9652450507\  
 H,-2.8756636128,-0.8726365359,4.8356919571\H,-2.3588838413,2.881805004  
 6,2.8137728122\H,-2.3805819078,1.5598722864,4.9168189889\H,1.895816467  
 3,-0.3074196644,0.4925994936\C,2.8875516488,-1.6992357357,-0.328534998  
 9\C,2.3024764078,-3.0491142514,0.1004972972\C,2.6838641799,-1.52358093  
 73,-1.8401918048\C,4.3926266444,-1.6727941499,-0.045943002\H,2.5125095  
 797,-3.2798141748,1.1492491262\H,1.2176406552,-3.0911286602,-0.0540432  
 456\H,2.7596110789,-3.8417726608,-0.5048358172\H,3.0635421262,-0.55919  
 26939,-2.1945443797\H,3.2358423499,-2.3125173544,-2.366268608\H,1.6266  
 771013,-1.6012346808,-2.119492953\H,4.8529154725,-2.5269819278,-0.5581  
 084303\H,4.8651738305,-0.7668517328,-0.4353934079\H,4.6327222741,-1.76  
 47617158,1.0161407091\C,1.8322480207,-0.4318514081,2.3930251723\C,1.46  
 81919448,0.9670934721,2.9070872977\C,0.690381162,-1.3904783334,2.76596  
 79639\C,3.1031058119,-0.932043463,3.088970489\H,2.2689863862,1.6948084  
 657,2.746848079\H,0.552267167,1.34333362,2.4354671721\H,1.2766549093,0  
 .9060595418,3.9854590864\H,0.8417315336,-2.401276727,2.3760037802\H,0.  
 6416528256,-1.4614600258,3.8598868792\H,-0.2805286881,-1.0261486993,2.  
 4160278574\H,2.9113524413,-0.9492945897,4.1690235855\H,3.3653946789,-1  
 .9526074758,2.7952065681\H,3.9735682693,-0.2900705675,2.9380324988\C,2  
 .8126580488,1.2301450992,0.0624135353\C,4.0614675542,1.4351207844,0.67  
 47234365\C,2.3751412256,2.1736374821,-0.8923575361\C,4.8677092299,2.52  
 2642308,0.3679034911\H,4.4237225208,0.7213004948,1.403190828\C,3.21310  
 67739,3.255634211,-1.2041878845\C,4.4424521412,3.4385637469,-0.5872447  
 907\H,5.8236352052,2.6452856088,0.868358812\H,2.8678080401,3.975622386  
 ,-1.9408392834\H,5.0596264171,4.293334481,-0.8480643201\C,1.0763082436  
 ,2.1704868361,-1.6249849229\C,-0.1055644883,2.5897604622,-1.0004141518  
 \C,1.0630299322,1.9404081882,-3.005775956\C,-1.2653419764,2.7930742181  
 ,-1.7460363412\H,-0.099916925,2.8023238371,0.065616296\C,-0.0996336822  
 ,2.1306630986,-3.7492000054\H,1.9810999282,1.6396495675,-3.5041093969\  
 C,-1.2650333195,2.5692559546,-3.1223465866\H,-2.1640929058,3.158030333  
 2,-1.2558602441\H,-0.0857459331,1.9665034184,-4.8233215713\H,-2.162041  
 7318,2.7578502441,-3.7062788217\\Version=EM64L-G09RevA.01\State=1-A\HF  
 =-1795.4141123\RMSD=9.905e-09\RMSF=3.769e-06\Dipole=-0.5439996,-1.0565  
 49,-0.9173233\Quadrupole=12.4608699,-9.0136281,-3.4472418,13.1571255,9  
 .751049,2.0460998\PG=C01 [X(C34H41Au1P1)]\\@

### IN3

1\1\GINC-SHI\_03\FOpt\RPBE1PBE\GenECP\C34H41Au1P1(1+)\YIN\06-Jul-2015\0  
 \\\#p opt genecp pbelpbe\\Title Card Required\\1,1\C,-0.0041407497,0.00  
 96827273,-0.0060723133\C,-0.0246565052,0.0207701259,1.554424828\H,1.01  
 23279777,0.0085245687,-0.4143869851\H,-0.5956846772,0.7633085858,-0.52

9746883\H,-0.6051486019,0.7959645148,2.0608075769\H,0.9845004577,0.004  
9249389,1.9829682079\C,-0.6100674843,-1.3908385642,1.4745013318\C,-0.4  
140431886,-2.7582843967,2.0912194724\C,-0.2226002564,-3.6297860674,0.8  
450859832\H,-1.2442530316,-3.0847283463,2.7263160754\H,0.4847139036,-2  
.7574616814,2.7223619516\C,-0.3451071554,-2.7884805385,-0.4415692297\C  
,0.9884725293,-3.3378055117,0.0130564968\H,1.7381237242,-2.6520152427,  
0.4056079174\H,1.3933361805,-4.1515281468,-0.5822130713\C,-0.585316133  
4,-1.4104062561,0.0855122268\Au,-2.7477286313,-1.1314375116,0.72718938  
54\H,-0.6011805794,-4.6476715382,0.8493797217\C,-0.9654459976,-3.28449  
20256,-1.7060933567\C,-2.2151026196,-3.9101524127,-1.7014357268\C,-0.3  
110780021,-3.0959778641,-2.9269767152\C,-2.8091385878,-4.3217984051,-2  
.8926143852\H,-2.7180357747,-4.0897923246,-0.7531202193\C,-0.903079968  
9,-3.5028729267,-4.1199181566\H,0.671193659,-2.6293599201,-2.938516425  
7\C,-2.156633569,-4.1124416223,-4.1057934389\H,-3.7761651347,-4.817453  
6814,-2.8737635798\H,-0.3820364172,-3.3520333846,-5.0612348381\H,-2.61  
59622646,-4.4365288816,-5.0351758689\P,-4.9161127216,-1.0080746634,1.6  
683993923\C,-4.7578680515,0.0245967397,3.2503820086\C,-3.8347442758,-0  
.7005582591,4.2354934539\C,-4.0979243479,1.3417563009,2.8173379061\C,-  
6.0859128293,0.3564573278,3.9372002079\H,-4.2959698763,-1.6000482344,4  
.6549425309\H,-2.8787081388,-0.9781187471,3.7762315864\H,-3.6172125024  
, -0.0276656228,5.0739652006\H,-4.7015269944,1.8800049924,2.0783765674\  
H,-3.9912917489,1.9896219665,3.6961028029\H,-3.0995020962,1.1803219668  
,2.3947588542\H,-5.866284816,0.9306797414,4.8457209526\H,-6.7284858035  
,0.9782854374,3.3084146501\H,-6.6446979789,-0.5314158981,4.2433702524\  
C,-5.5282014141,-2.787480992,1.9519270837\C,-6.0643138083,-3.287324816  
3,0.6040494931\C,-4.3225204005,-3.6549539656,2.3439925384\C,-6.6025345  
18,-2.9598606404,3.0317961209\H,-6.9648602121,-2.7534553793,0.28796041  
87\H,-5.3137358196,-3.1965388811,-0.190575184\H,-6.3169283139,-4.35064  
36967,0.6974027672\H,-3.8642421901,-3.3396752711,3.2858065237\H,-4.661  
6802005,-4.6903989048,2.4717845618\H,-3.5498258217,-3.6478932587,1.567  
1567335\H,-6.868014483,-4.0231542109,3.08193122\H,-6.2468439122,-2.671  
6246896,4.0252387788\H,-7.52582616,-2.4164803257,2.8182995157\C,-6.165  
8667477,-0.1312020154,0.6491448334\C,-7.4990563738,-0.1226069656,1.093  
7834907\C,-5.8365170418,0.6103411245,-0.5075024535\C,-8.4889586361,0.5  
966511972,0.437631613\H,-7.7746483038,-0.6769728111,1.9826365031\C,-6.  
8466427327,1.3500104728,-1.1414349407\C,-8.1567563378,1.348646078,-0.6  
837051309\H,-9.5094066483,0.5742192509,0.8081867443\H,-6.5876624487,1.  
9145437028,-2.0326868946\H,-8.9146222859,1.9244234382,-1.2067528961\C,  
-4.504071265,0.6612443027,-1.1657646796\C,-3.9575460389,-0.4789466167,  
-1.7802307595\C,-3.8567676256,1.8906241617,-1.3363921903\C,-2.80988008  
92,-0.379423663,-2.5708863727\H,-4.489156778,-1.4255717835,-1.72261721  
43\C,-2.7049845486,1.9854415732,-2.1147232461\H,-4.2757492373,2.781422  
3454,-0.8752039793\C,-2.1853585526,0.8541636041,-2.7409011684\H,-2.427  
6002085,-1.2640089853,-3.0708361353\H,-2.2264040626,2.9517070072,-2.24

92318335\H,-1.3051519313,0.9350925821,-3.3725158875\\Version=EM64L-G09  
RevA.01\State=1-A\HF=-1795.4439289\RMSD=8.412e-09\RMSF=3.071e-06\Dipol  
e=-0.2348046,0.2514453,0.722679\Quadrupole=13.4373895,-10.1252949,-3.3  
120946,-4.6444734,-7.998228,-0.614177\PG=C01 [X(C34H41Au1P1)]\@

### TS3

1\1\GINC-SHI\_02\FTS\RPBE1PBE\GenECP\C34H41Au1P1(1+)\YIN\17-Aug-2015\0\  
\#p opt=(calcf,ts,noeigen) genecp pbelpbe\\Title Card Required\\1,1\C  
,4.2257069027,-1.7441887666,-1.5074974085\C,3.8609096293,-1.4106999031  
, -2.9984735986\H,5.2900138168,-1.651770656,-1.2660506798\H,3.86789294,  
-2.7198886603,-1.1604591038\H,3.302801311,-2.1906096462,-3.5286052374\  
H,4.7212816904,-1.1173525373,-3.6098599434\C,3.0455872553,-0.275976551  
2,-2.4221843882\C,2.1976034165,0.92935002,-2.6701715558\C,2.0590109507  
,1.54837692,-1.2824685252\H,1.2263024059,0.6997084205,-3.1271164506\H,  
2.7025540318,1.6505006712,-3.3319402809\C,2.9627047748,0.4431054081,-0  
.1189795353\C,3.3451125557,1.8145417087,-0.5647897975\H,4.2438384534,1  
.8745736135,-1.180142375\H,3.2935896738,2.5999380536,0.1868671754\C,3.  
3651859808,-0.5435781275,-1.1524086768\Au,0.4725237624,0.1228228547,-0  
.2585468532\H,1.2667745326,2.2746376557,-1.0794834486\C,2.8133225163,0  
.1086722265,1.3290221011\C,3.030039796,-1.2121911928,1.7492924811\C,2.  
5587859973,1.0857422061,2.3037975123\C,3.0042737184,-1.5419752095,3.10  
08965161\H,3.2421825179,-1.9814140102,1.0133915008\C,2.5172154859,0.74  
93952627,3.651258815\H,2.3803195628,2.1155181543,2.0099481727\C,2.7435  
066635,-0.5650681771,4.057426838\H,3.195850098,-2.5670591597,3.4053927  
266\H,2.3208781401,1.520947593,4.3904741389\H,2.7265781075,-0.82158505  
56,5.1125353319\P,-1.4998944625,-1.0630223363,-0.0121036087\C,-1.41932  
24025,-2.0630305295,1.5957022813\C,-0.2901200003,-3.0913895329,1.48078  
56386\C,-1.0751934624,-1.0508639818,2.6976167968\C,-2.7164619461,-2.77  
50432924,1.9948170225\H,-0.5357230658,-3.9005766892,0.7860540833\H,0.6  
542673132,-2.6305889591,1.1724155468\H,-0.129171156,-3.5453283679,2.46  
62393986\H,-1.8523408213,-0.2845152194,2.7981832038\H,-1.012384628,-1.  
5819460366,3.6554315087\H,-0.1117296528,-0.558732605,2.5251429464\H,-2  
.5177026951,-3.3487644015,2.9084312799\H,-3.5180510281,-2.0686519211,2  
.226303812\H,-3.0728725037,-3.4837519601,1.2421112781\C,-1.6753551169,  
-2.1105495758,-1.5933906344\C,-2.155726428,-1.1495737025,-2.6893067367  
\C,-0.2890199412,-2.6414864337,-1.9894023428\C,-2.6339006633,-3.301394  
0166,-1.496073411\H,-3.1845816889,-0.8159270731,-2.5271745216\H,-1.514  
0735397,-0.2622515707,-2.7610008612\H,-2.1162836901,-1.6684312663,-3.6  
549041701\H,0.145486652,-3.3016826201,-1.2341349907\H,-0.3922857576,-3  
.2210637663,-2.9153104203\H,0.4205244308,-1.8281399059,-2.1781578006\H  
, -2.3121287281,-4.0386176034,-0.7547714064\H,-3.6640951262,-3.00809068  
2,-1.2824453771\H,-2.6472999797,-3.8086670185,-2.4685816644\C,-3.01171  
23527,-0.0201096297,0.082931918\C,-4.2478554302,-0.6905107826,0.112802  
632\C,-3.0175990059,1.3922622615,0.0350298885\C,-5.4589445889,-0.01255

79742,0.092951405\H,-4.271443152,-1.7718616123,0.1471323476\C,-4.25323  
 32084,2.0574172066,0.004734634\C,-5.4616213879,1.375904937,0.033339231  
 6\H,-6.3907138503,-0.5696135553,0.1190742049\H,-4.2494138569,3.1432725  
 498,-0.0272778536\H,-6.3968830125,1.9275734331,0.0132152314\C,-1.83427  
 81688,2.3002553014,0.0242124254\C,-1.5902394121,3.0934376133,-1.105168  
 9019\C,-1.0819852358,2.5342830048,1.183586466\C,-0.6197980699,4.092599  
 7449,-1.0793985225\H,-2.1848669585,2.9375983094,-2.0018015819\C,-0.121  
 4485552,3.5443812211,1.2131874588\H,-1.2846047998,1.9574097783,2.08139  
 95593\C,0.1120544924,4.3277526391,0.0843305898\H,-0.4551117151,4.70645  
 00305,-1.9607405187\H,0.4212271698,3.7396030604,2.1342786449\H,0.84377  
 64992,5.1303064151,0.1163694394\\Version=EM64L-G09RevA.01\State=1-A\HF  
 =-1795.4160561\RMSD=5.442e-09\RMSF=1.378e-06\Dipole=-0.1963372,-0.1863  
 621,-0.1926354\Quadrupole=9.3402799,-1.6981079,-7.642172,3.5497286,-1.  
 0388844,-2.2832609\PG=C01 [X(C34H41Au1P1)]\@

#### IN4

1\1\GINC-SHI\_02\FOpt\RPBE1PBE\GenECP\C34H41Au1P1(1+)\YIN\07-Jul-2015\0  
 \#p opt genecp pbelpbe\\Title Card Required\\1,1\C,-1.148893854,-0.35  
 95984171,-2.5853880193\C,-1.5140592492,0.7062177284,-1.5022731201\H,-0  
 .1835676689,-0.2076360431,-3.078967918\H,-1.9233872713,-0.5035477839,-  
 3.3457757607\H,-2.4839344851,1.2052891971,-1.6199032169\H,-0.755039784  
 6,1.4784429588,-1.328199879\C,-1.5071052922,-0.4119409425,-0.503971545  
 \C,-1.7141160622,-0.6452004364,0.9254581109\C,-2.00284441,-2.142148511  
 7,1.1251043061\H,-2.4853184111,0.0109056588,1.3445669265\H,-0.76462916  
 46,-0.3404914975,1.4213219371\C,-0.8349784368,-2.6798556396,-1.0956287  
 417\C,-0.9417665224,-2.9688145869,0.3770029506\H,0.0736582182,-2.76220  
 47008,0.782076041\H,-1.118643124,-4.0346039948,0.5402448503\C,-1.15803  
 83433,-1.362718194,-1.4431240339\Au,-3.9670946896,-2.6731532376,0.6102  
 710811\H,-1.8944693963,-2.3730365643,2.1912219732\C,-0.3449140587,-3.6  
 557331431,-2.035613005\C,-0.4150651013,-3.4162732433,-3.4278665322\C,0  
 .2282266097,-4.8688726712,-1.5913985392\C,0.0577289901,-4.3521450975,-  
 4.3313961931\H,-0.8658172808,-2.5023087067,-3.7963098722\C,0.718758511  
 3,-5.7920542643,-2.4987878703\H,0.3112305616,-5.0742446072,-0.52983468  
 85\C,0.6305185984,-5.5384037575,-3.8690158818\H,-0.0138256613,-4.16144  
 80362,-5.3976734874\H,1.1704701231,-6.7130903773,-2.1438572267\H,1.009  
 8448141,-6.2679224684,-4.5789481546\P,-6.1279626377,-3.3853492783,-0.0  
 482431346\C,-6.1333594692,-5.282260651,-0.0320262823\C,-5.1046827574,-  
 5.7826303008,-1.0525768952\C,-5.6662612871,-5.6718759858,1.3784460269\  
 C,-7.4795834009,-5.963354985,-0.2896667704\H,-5.4433909423,-5.64299344  
 45,-2.0844011922\H,-4.1357753381,-5.283812907,-0.9310960701\H,-4.95200  
 98645,-6.859102444,-0.9037819556\H,-6.3629368546,-5.3161454065,2.14584  
 32681\H,-5.6237022128,-6.7661345919,1.4511509516\H,-4.6698462007,-5.27  
 43370856,1.603808848\H,-7.3208758881,-7.049192051,-0.2888613822\H,-8.2  
 060479086,-5.742219483,0.4968539077\H,-7.9170848759,-5.7008946142,-1.2

566303651\C,-6.4819498545,-2.6301548183,-1.7625646675\C,-6.8621970953,  
-1.1662086367,-1.5008669607\C,-5.1793845082,-2.6463286766,-2.578400154  
9\C,-7.5729768229,-3.3019363212,-2.6011189197\H,-7.827572287,-1.073346  
6365,-0.9948206193\H,-6.1050165387,-0.6572834565,-0.8910372453\H,-6.93  
11937648,-0.6382044819,-2.460399269\H,-4.8274405313,-3.6599195894,-2.7  
894066315\H,-5.3655742529,-2.1522750759,-3.5412558235\H,-4.374180975,-  
2.1098327801,-2.0637724877\H,-7.3304952861,-4.3401337757,-2.8478903892  
\H,-8.5568667705,-3.2725454157,-2.1277535644\H,-7.6646027867,-2.758702  
4876,-3.5504879455\C,-7.5382311358,-2.8756516214,1.0242505364\C,-8.845  
7415126,-3.2056207951,0.6251771542\C,-7.3728858699,-2.1272525033,2.210  
2242541\C,-9.9618118775,-2.8162116762,1.3537995147\H,-9.0022706424,-3.  
7830836893,-0.2770004862\C,-8.5121816065,-1.7394910488,2.9310324027\C,  
-9.7940004674,-2.0740452343,2.5172117923\H,-10.954597121,-3.0923889037  
,1.0106337135\H,-8.3717503286,-1.1651094898,3.8424848058\H,-10.6538511  
582,-1.7588010987,3.1012374835\C,-6.0762484117,-1.6895499817,2.8062331  
36\C,-5.6620320061,-0.3589252169,2.67225439\C,-5.3537844492,-2.5376367  
619,3.6533282452\C,-4.5467326931,0.1096989426,3.3631561135\H,-6.236016  
9394,0.3156137131,2.0416455306\C,-4.2387301012,-2.0687686638,4.3440605  
748\H,-5.6850544252,-3.5628973352,3.7923992892\C,-3.833226241,-0.74354  
75827,4.2028294397\H,-4.2537688934,1.1524840626,3.2683692417\H,-3.6996  
805405,-2.7362561817,5.0109917633\H,-2.978471861,-0.3717975502,4.76147  
31967\\Version=EM64L-G09RevA.01\State=1-A\HF=-1795.4355912\RMSE=9.827e  
-09\RMSF=2.953e-06\Dipole=2.4007959,0.0806553,-2.1561057\Quadrupole=19  
.2393399,-11.2374292,-8.0019107,-1.5437428,-20.1174915,6.7744738\PG=C0  
1 [X(C34H41Au1P1)]\@

# TS5

1\1\GINC-SHI\_02\FTS\RPBE1PBE\GenECP\C34H41Au1P1(1+)\YIN\20-Aug-2015\0\  
\#p opt=(calcf,ts,noeigen) genecp pbelpbe\\Title Card Required\\1,1\C  
,4.5631023786,-1.1028034089,-2.2259309612\C,3.9595851438,-0.4070151063  
,-3.49479721\H,5.6440071328,-0.9911634504,-2.0949280496\H,4.3099029068  
,-2.1671189362,-2.1638525684\H,3.4776260288,-1.0591442799,-4.228855687  
1\H,4.6602686551,0.2524217668,-4.0160519397\C,3.0489119437,0.355900648  
7,-2.549924065\C,1.5442197283,1.635690249,-1.1091283293\H,1.7718467058  
,-0.0149307228,-2.6415945392\H,1.4988176767,1.6754823212,-3.3548145765  
\C,1.9601196204,1.2469178829,-2.4650868583\C,3.5761734156,0.3783136093  
,-0.1504696731\C,2.6902624041,1.6195332694,-0.0809108893\H,3.351100306  
2,2.4966805388,-0.2071211269\H,2.2594007341,1.7123613248,0.9192834353\  
C,3.6976875392,-0.1805317018,-1.3831734068\Au,-0.0853700153,0.38088435  
4,-0.5583873896\H,1.0557022519,2.6154429765,-1.1342454814\C,4.35086800  
06,-0.0432953909,1.0129982761\C,4.9469269523,-1.3176650708,1.056893657  
5\C,4.5397914177,0.8193292818,2.1066456115\C,5.7069746742,-1.709570502  
6,2.1488196078\H,4.7887838669,-2.0130472793,0.2384047078\C,5.312623615  
1,0.4293076432,3.1930602331\H,4.1001835979,1.8118260968,2.1002581774\C

,5.8967956229,-0.8350102484,3.2187457039\H,6.1521511755,-2.7000126706,  
2.1696293991\H,5.4595638531,1.1139262163,4.0232162504\H,6.4955024721,-  
1.1408782704,4.0718317532\P,-1.8058222468,-1.1173023513,0.0229106061\C  
,-1.1708893089,-2.2279239617,1.4201105355\C,0.0160937784,-3.0438696749  
,0.895225256\C,-0.6714006934,-1.2734641238,2.5141900162\C,-2.204484900  
7,-3.1668983046,2.0497106739\H,-0.2941719021,-3.8176152442,0.186048554  
9\H,0.7674303753,-2.4055103487,0.4147382331\H,0.4977946335,-3.55125004  
37,1.7403562018\H,-1.4828545461,-0.6537382506,2.911286321\H,-0.2707894  
992,-1.8666932138,3.3457402257\H,0.1276939901,-0.6166445131,2.15141983  
62\H,-1.6991057232,-3.7669197425,2.8168290182\H,-3.0061357481,-2.61473  
40132,2.5478252277\H,-2.6484532049,-3.8649233988,1.3351168068\C,-2.306  
3528974,-2.0676564633,-1.5506718787\C,-3.1915041477,-1.1117645938,-2.3  
616441061\C,-1.0372751405,-2.3536319622,-2.3683474135\C,-3.0411642388,  
-3.3939334183,-1.332876913\H,-4.1596786866,-0.9372455312,-1.8839009162  
\H,-2.70322145,-0.1411136059,-2.5134775667\H,-3.375410175,-1.551083411  
4,-3.3499615156\H,-0.3218629294,-2.9857747589,-1.8350791362\H,-1.32393  
21137,-2.8766520883,-3.2894716444\H,-0.5298320204,-1.4243131089,-2.650  
2131707\H,-2.4224450062,-4.1321711966,-0.8142017253\H,-3.9826556935,-3  
.2798304013,-0.7906271571\H,-3.2912420156,-3.8156521104,-2.3146000675\  
C,-3.336246196,-0.3122743163,0.6510891562\C,-4.4543343496,-1.119898601  
,0.9223761028\C,-3.4651257377,1.0858595721,0.806705043\C,-5.6699911048  
,-0.5849605437,1.3269926665\H,-4.379187211,-2.1942259639,0.8111520744\  
C,-4.7040611211,1.6077924605,1.2069954783\C,-5.7973481079,0.7925030165  
,1.4657536579\H,-6.5106929588,-1.2426648756,1.5271642975\H,-4.79424403  
03,2.6840900121,1.3245542405\H,-6.740661909,1.2316683654,1.7771238926\  
C,-2.393153054,2.1037276067,0.5993750214\C,-2.446537477,2.9591277303,-  
0.5085784959\C,-1.4338066056,2.3489597074,1.5917115366\C,-1.5589251078  
,4.0266738118,-0.6258619642\H,-3.2041962858,2.7955207701,-1.2707809715  
\C,-0.5525151955,3.422086957,1.4778362222\H,-1.4062064541,1.7186992738  
,2.4760909887\C,-0.613622771,4.2653089322,0.3700253155\H,-1.6250973597  
,4.6887631963,-1.4850605482\H,0.1651043821,3.6140873795,2.2711912472\H  
,0.0569663608,5.1169502036,0.2936456746\\Version=EM64L-G09RevA.01\Stat  
e=1-A\HF=-1795.4030027\RMSD=4.649e-09\RMSF=1.570e-06\Dipole=1.1604684,  
-0.5761388,-0.9640342\Quadrupole=20.5000117,-12.1209607,-8.379051,0.76  
49869,-4.4577269,-0.4899213\PG=C01 [X(C34H41Au1P1)]\\@

# IN6

1\1\GINC-SHI\_02\FOpt\RPBE1PBE\GenECP\C34H41Au1P1(1+)\YIN\14-Jul-2015\0  
\\#p genecp pbelpbe opt\\Title Card Required\\1,1\C,0.0801028939,-0.23  
20276978,-0.6644096494\C,-0.3343665515,-0.054784849,0.8258096107\H,1.1  
270909865,-0.4530190461,-0.8893031582\H,-0.2427143031,0.6254339121,-1.  
2679097774\H,-0.46538059,0.9639484714,1.2012553327\H,0.3327366655,-0.6  
127803185,1.4894545529\C,-1.6277680067,-0.8637285274,0.5039248167\C,-2  
.2361378716,-3.2323972912,0.9339968653\H,-2.2888533104,-1.7331904043,2

.4661741612\C,-2.1604450833,-1.9370174031,1.4018337635\C,-0.8482596367  
 ,-2.6602026242,-1.1161403224\C,-1.7507930135,-3.6672114726,-0.43190033  
 13\H,-1.2085581009,-4.6097293299,-0.285437972\H,-2.5991178764,-3.94006  
 41533,-1.0768124529\C,-0.8870453865,-1.3895815724,-0.6946662819\Au,-4.  
 3551391064,-2.3058729347,0.867378997\H,-2.4435392878,-4.0306967901,1.6  
 48255684\C,0.0781373682,-3.1197204815,-2.1706946123\C,0.381429783,-2.2  
 690527965,-3.2451749449\C,0.6860033666,-4.3830346866,-2.1386195987\C,1  
 .2699255293,-2.6590030146,-4.2403226837\H,-0.1080734423,-1.3008549521,  
 -3.3071498029\C,1.5743831392,-4.7737452648,-3.1348202888\H,0.491585405  
 3,-5.0679276882,-1.3175794322\C,1.8710032713,-3.9142710672,-4.18931297  
 45\H,1.4849696461,-1.9844293656,-5.0644270574\H,2.0404033779,-5.753823  
 9345,-3.0837686844\H,2.5616824089,-4.2229720675,-4.96866118\H,-6.58270  
 71727,-2.3015260277,0.1570400171\C,-7.2952479222,-4.0349750658,0.42991  
 66955\C,-6.540936174,-5.0280489392,-0.4602694615\C,-7.0320147505,-4.37  
 02532386,1.9042711255\C,-8.8013200128,-4.1560378462,0.1761020825\H,-6.  
 7830633636,-4.9005241052,-1.5196121499\H,-5.4540528817,-4.9514024392,-  
 0.337747278\H,-6.8357278307,-6.0464378704,-0.1797128284\H,-7.552154807  
 8,-3.6783057186,2.575602581\H,-7.4117530958,-5.3783315183,2.1108218573  
 \H,-5.96320664,-4.3565138168,2.1476150135\H,-9.0887167233,-5.203526457  
 2,0.3287129698\H,-9.383748124,-3.5558017482,0.8802983342\H,-9.09099836  
 69,-3.8873341243,-0.8431360524\C,-6.5640293392,-1.7211458622,-1.653098  
 6114\C,-6.3643761822,-0.2001820097,-1.6145735842\C,-5.3529690086,-2.35  
 02705204,-2.3593054302\C,-7.8215691605,-2.056422648,-2.461119044\H,-7.  
 2302796351,0.323298016,-1.1997181513\H,-5.4789983895,0.0801240491,-1.0  
 302049281\H,-6.2103207809,0.1586912964,-2.6394002847\H,-5.4011717785,-  
 3.4418842364,-2.3962913339\H,-5.3271877622,-1.9870296388,-3.3939843423  
 \H,-4.4079912451,-2.0632241373,-1.8839292406\H,-7.9806370231,-3.134361  
 1122,-2.5567134773\H,-8.7272433448,-1.5985294253,-2.0561291826\H,-7.69  
 31849733,-1.6586450818,-3.4751422545\C,-7.6321722809,-1.1254564624,1.0  
 940588174\C,-8.960833353,-0.9444405335,0.6707729263\C,-7.1519809329,-0  
 .3438782991,2.1678776585\C,-9.8022098067,-0.0180272361,1.2715794438\H,  
 -9.3520145075,-1.5358967383,-0.1480194768\C,-8.0159640256,0.5930640577  
 ,2.7538128722\C,-9.3233818606,0.7615369824,2.3185352464\H,-10.82305768  
 01,0.0938579202,0.9188003301\H,-7.6427753564,1.1903725936,3.5808985878  
 \H,-9.9645141425,1.4947338623,2.7989640295\C,-5.7958401501,-0.41265074  
 11,2.7904693999\C,-4.8914040662,0.6444792884,2.6106279416\C,-5.4904818  
 881,-1.4033855981,3.7361964371\C,-3.7207510069,0.7146781561,3.36334495  
 61\H,-5.1306190154,1.4330171758,1.9013154669\C,-4.3214161474,-1.329270  
 6158,4.4913436217\H,-6.1988657292,-2.2071550644,3.9156205033\C,-3.4379  
 537541,-0.2654494056,4.3133193921\H,-3.0429276951,1.5528717549,3.22653  
 98731\H,-4.1175789446,-2.0885242131,5.2415160468\H,-2.5428190167,-0.19  
 11580977,4.9248176883\H,-2.4176010802,-0.150061291,0.2248687407\\Versi  
 on=EM64L-G09RevA.01\State=1-A\HF=-1795.4702169\RMSE=9.930e-09\RMSF=2.3  
 90e-06\Dipole=-1.3075906,0.1108057,0.4113822\Quadrupole=17.8452127,-9.

4973542,-8.3478586,-4.203374,-4.8169983,5.0180888\PG=C01 [X(C34H41Au1P

#### TS4

1\1\GINC-SHI\_02\FTS\RPBE1PBE\GenECP\C34H41Au1P1(1+)\YIN\06-Jul-2015\0\  
\#p opt=(calcf,ts,noeigen) genecp pbelpbe\\Title Card Required\\1,1\C  
,2.7802338488,0.0492661916,-1.582896486\C,2.5492578805,-1.3960817743,-  
1.1080340142\H,1.8914385522,0.4786834247,-2.0381540514\H,3.7181172907,  
0.2843662038,-2.0795913336\H,3.4340519565,-2.0196364458,-0.9925712189\  
H,1.6981073901,-1.8964256933,-1.5557807344\C,1.7781271459,-0.824240229  
1,0.4042910192\C,2.3157579733,-1.4797153505,1.6747872317\C,3.707103004  
8,-0.9073682538,1.8923729803\H,2.3225441155,-2.5701772633,1.5573593722  
\H,1.6531764052,-1.2677258787,2.5217514665\C,4.0575966718,-0.022674832  
,0.6947585661\C,3.7865326756,0.5653575574,2.0741592674\H,2.8673502699,  
1.1268462447,2.2245033991\H,4.6638270969,0.968819947,2.5708843752\C,2.  
8212181015,-0.0137186234,-0.12419388\Au,-0.2690301131,-0.6340700111,0.  
1129260959\H,4.4879180272,-1.5222264044,2.3299853945\C,5.4021479559,0.  
0703398504,0.056586172\C,6.1815809594,-1.0730711305,-0.1405661479\C,5.  
8878915089,1.3069719721,-0.3829472842\C,7.4242259998,-0.9834609223,-0.  
7628735303\H,5.8209600709,-2.0374452447,0.2107686843\C,7.1266415499,1.  
396506822,-1.0098832834\H,5.293855012,2.2037102125,-0.220233011\C,7.89  
68142197,0.2507068915,-1.2004340742\H,8.0245591258,-1.8779010143,-0.90  
21660876\H,7.4959612879,2.3624622655,-1.3422808563\H,8.8670500613,0.32  
17902838,-1.683358377\P,-2.6127875966,-0.7065181631,-0.1277616023\C,-3  
.2812824008,-1.610706512,1.3992358888\C,-2.7218215485,-3.0380335602,1.  
4048658392\C,-2.7188219496,-0.8455018211,2.6062699984\C,-4.8055405854,  
-1.6589826009,1.5410795113\H,-3.1789533365,-3.6654425006,0.6331961326\  
H,-1.6338515996,-3.0537698912,1.2686861388\H,-2.9446997084,-3.50177181  
,2.373776936\H,-3.074496025,0.1906999819,2.6301513645\H,-3.0603611991,  
-1.3341398864,3.5273095669\H,-1.6225487328,-0.8380095283,2.6129085276\  
H,-5.0455787097,-2.2431617306,2.4382712669\H,-5.235487789,-0.663488530  
7,1.6812747674\H,-5.304894397,-2.1446892947,0.6985252072\C,-2.98607733  
48,-1.586766005,-1.775162951\C,-2.8112159793,-0.5314033139,-2.87539507  
31\C,-1.9339119767,-2.6852790279,-1.9891015124\C,-4.3732801378,-2.2249  
036189,-1.8891711746\H,-3.5897801639,0.235839382,-2.8403312826\H,-1.83  
53268077,-0.0342250864,-2.8090698427\H,-2.8663815408,-1.0264978899,-3.  
8527286133\H,-1.9556691571,-3.4523286434,-1.2105610733\H,-2.1312863222  
, -3.1789708604,-2.9489494574\H,-0.921147259,-2.268657179,-2.0265752945  
\H,-4.4630990289,-2.6818884232,-2.8825790825\H,-4.5262213888,-3.020669  
8043,-1.1542585087\H,-5.1866629184,-1.5009135167,-1.8012347797\C,-3.48  
53268784,0.9105188358,-0.1988997784\C,-4.8766567052,0.9089182359,-0.40  
28867107\C,-2.8218945821,2.153614769,-0.117863056\C,-5.6043920885,2.08  
46284308,-0.5279293632\H,-5.4101989124,-0.030961274,-0.4677940109\C,-3  
.5730099798,3.3304205325,-0.2531793008\C,-4.9461108779,3.3069960968,-0  
.4554555239\H,-6.6782569248,2.0415825928,-0.6838926327\H,-3.0534707794

,4.2823594372,-0.188389584\H,-5.4967626699,4.238015255,-0.5534099698\C  
 ,-1.3622025325,2.3650574703,0.1102423315\C,-0.5384638506,2.7470267331,  
 -0.9560130201\C,-0.8351870018,2.3789105032,1.4073806421\C,0.7810077676  
 ,3.1328475794,-0.7311752418\H,-0.9492575531,2.7709284269,-1.9623987541  
 \C,0.482488659,2.7718984377,1.6324485182\H,-1.4746190837,2.1191948091,  
 2.2465946678\C,1.2929147457,3.152967427,0.564747675\H,1.3986341182,3.4  
 511716387,-1.5671499523\H,0.8632907545,2.8114350415,2.6499599258\H,2.3  
 104829238,3.4900370609,0.7447555874\\Version=EM64L-G09RevA.01\State=1-  
 A\HF=-1795.4231121\RMSD=3.312e-09\RMSF=1.392e-06\Dipole=0.6140127,-0.3  
 882497,-0.3978959\Quadrupole=37.4245491,-14.6412609,-22.7832882,-0.488  
 2669,-1.2764354,-1.117762\PG=C01 [X(C34H41Au1P1)]\\@

# IN5

1\1\GINC-SHI\_02\FOpt\RPBE1PBE\GenECP\C34H41Au1P1(1+)\YIN\07-Jul-2015\0  
 \\#p opt genecp pbelpbe\\Title Card Required\\1,1\C,0.2801928019,0.634  
 7518187,-0.0667351959\C,0.467800033,0.9389914536,1.3848248503\C,1.8998  
 183197,0.600730102,1.7443409924\H,-0.2665758585,0.326657653,1.93527293  
 94\H,0.1769002397,1.978119469,1.5981099435\C,2.5388142229,-0.054324847  
 3,0.5340973777\C,2.966621525,1.3207883719,0.9734554723\H,2.6801058485,  
 2.174255645,0.3604951782\H,3.9407213182,1.4054940447,1.4464774836\Au,-  
 1.4308968492,1.0615999721,-1.0574806784\H,2.1290884566,0.2498450072,2.  
 7457459714\C,3.4775957543,-1.2117917671,0.6003239901\C,3.069595518,-2.  
 4311637152,1.1543236311\C,4.7695014788,-1.1080646452,0.0764645306\C,3.  
 9341517476,-3.5208720297,1.1832224591\H,2.0710949078,-2.5188073883,1.5  
 77923949\C,5.635973784,-2.1981852337,0.1035372766\H,5.1010061658,-0.16  
 0255092,-0.3418935672\C,5.2192191733,-3.4062583483,0.6556726676\H,3.60  
 84133694,-4.458527166,1.6247361963\H,6.6391756019,-2.1015655649,-0.301  
 8856083\H,5.8960116101,-4.2554074064,0.681967374\P,-3.5685695104,1.324  
 3446107,-2.0642941557\C,-4.8393005329,1.4972352668,-0.6701933334\C,-4.  
 8518542323,0.2022631844,0.1505614927\C,-4.3317324832,2.6458131792,0.21  
 30244554\C,-6.2651771795,1.8366551929,-1.1138811272\H,-5.319398081,-0.  
 6267109272,-0.3897139841\H,-3.8437490549,-0.1031033883,0.455391717\H,-  
 5.4400823453,0.3677117169,1.0614619748\H,-4.297916838,3.5931915564,-0.  
 3360966237\H,-5.0218699795,2.7768763284,1.0556756867\H,-3.3351415129,2.  
 4417260518,0.6217659643\H,-6.9020495537,1.8715522852,-0.2212539622\H,  
 -6.3233784639,2.8192703792,-1.5900646217\H,-6.6954458418,1.091633493,-  
 1.7879294732\C,-3.8518139691,-0.1801763337,-3.1967163682\C,-3.02767831  
 26,0.0868842071,-4.4635828911\C,-3.2813593324,-1.4275233799,-2.5042529  
 13\C,-5.3057264163,-0.4713023218,-3.5779317557\H,-3.4346991592,0.91048  
 61953,-5.0571857228\H,-1.9817493937,0.3188137601,-4.2260591674\H,-3.03  
 42696358,-0.8156794987,-5.0869631566\H,-3.7967203195,-1.6714091404,-1.  
 5715158655\H,-3.3959616733,-2.2844897648,-3.1795954864\H,-2.2146367727  
 ,-1.3145058799,-2.282271788\H,-5.3180505444,-1.3444971376,-4.242131015  
 8\H,-5.9217587339,-0.7209856444,-2.7090833033\H,-5.780019844,0.3461023

837,-4.1258383198\C,-3.7455961227,2.8159788273,-3.1236271746\C,-4.9464  
169381,2.9915457883,-3.8331277958\C,-2.7100403987,3.7575674121,-3.3129  
55868\C,-5.134295975,4.0506288102,-4.7111120597\H,-5.7568708919,2.2855  
387414,-3.7025648378\C,-2.9153708343,4.8147058521,-4.2114951364\C,-4.1  
077309592,4.9676577452,-4.9059033039\H,-6.0768309135,4.1529920983,-5.2  
406742217\H,-2.1142579279,5.5353356552,-4.3501816274\H,-4.2338694836,5  
.8008132288,-5.5910934378\C,-1.3836774905,3.7606247833,-2.6294404721\C  
,-0.2257573462,3.4424608978,-3.3516798766\C,-1.2469765049,4.2570423489  
,-1.3257944183\C,1.035464977,3.6161397277,-2.7850330349\H,-0.319241004  
2,3.0874631666,-4.3751049154\C,0.0153875716,4.4345214797,-0.7614445739  
\H,-2.1329279572,4.5489171971,-0.7690649549\C,1.1594205266,4.118905463  
,-1.4912913873\H,1.9236524346,3.3894767186,-3.3690695192\H,0.102636332  
3,4.8515197038,0.2384690973\H,2.1439739407,4.2911407788,-1.0647061059\  
C,1.4543796702,-0.0140904143,-0.5295696914\C,1.2079669115,-1.230949827  
4,-1.503274658\C,1.8075593228,-0.0262643421,-2.0405832317\H,1.84323431  
64,-2.0733150741,-1.2425157306\H,0.1679950545,-1.4557348009,-1.7129644  
495\H,1.2188955027,0.6380999051,-2.6649455274\H,2.8829815287,-0.012577  
5774,-2.1991235123\\Version=EM64L-G09RevA.01\State=1-A\HF=-1795.431278  
7\RMSD=7.133e-09\RMSF=3.722e-06\Dipole=-0.2047669,-0.2408614,-0.231316  
\Quadrupole=21.4073079,-8.5385536,-12.8687543,-13.1100886,13.5681629,-  
8.8051275\PG=C01 [X(C34H41Au1P1)]\@

## TS6

1\1\GINC-SHI\_03\FTS\RPBE1PBE\GenECP\C34H41Au1P1(1+)\YIN\09-Jul-2015\0\  
\#p opt=(z-matrix,calcf,ts,noeigen) genecp pbelpbe\\Title Card Requir  
ed\\1,1\C,1.7866293371,0.2388824243,0.505370407\H,2.0395920809,-0.1527  
022353,1.6612872101\C,2.3134366678,1.1980661485,1.3958466293\C,3.71608  
0458,1.5149821578,1.1573579591\H,1.7100177013,1.6539871486,2.178275071  
3\C,4.1570254778,0.6039493711,-0.0077973352\C,3.9766280159,2.059460836  
,-0.2421627045\H,3.1227643579,2.4038804592,-0.8203046107\H,4.870304209  
9,2.6713954662,-0.3221088938\Au,-0.2113492364,-0.2342077209,0.26751322  
16\H,4.3787210529,1.80815489,1.9648267716\C,5.5175102824,-0.0051727043  
,-0.0508710866\C,5.9063873703,-0.9495119986,0.9061427074\C,6.411505828  
,0.3346385666,-1.0696311627\C,7.1661769655,-1.5350442221,0.8490132806\  
H,5.2190819749,-1.219321718,1.7051291816\C,7.6724453071,-0.2535631254,  
-1.1297595876\H,6.1170348853,1.0653360247,-1.8192201681\C,8.0517683799  
,-1.1875381486,-0.1702395631\H,7.46041968,-2.2602865436,1.6022932466\H  
,8.3588233719,0.020154298,-1.9258678544\H,9.0365272675,-1.6437011937,-  
0.2136872895\P,-2.434507249,-0.9683400648,0.0314023365\C,-2.9698004382  
,-1.6906695324,1.6991417428\C,-2.0940472506,-2.9081603738,2.0161144462  
\C,-2.6902199,-0.5892441317,2.7323178468\C,-4.4474188176,-2.0785073748  
,1.8050368361\H,-2.3270750698,-3.7653881349,1.3769417187\H,-1.02551448  
89,-2.681455934,1.9210686021\H,-2.2792955908,-3.2163020619,3.052471302  
8\H,-3.2651846827,0.3199463165,2.5243841792\H,-2.9871243937,-0.9505148

563,3.724834344\H,-1.6267117835,-0.32638411,2.7721550234\H,-4.61628100  
91,-2.5130547452,2.7981472029\H,-5.1062549775,-1.2104932975,1.71554517  
75\H,-4.7501386313,-2.8277405929,1.0690608241\C,-2.4836126842,-2.20814  
8428,-1.4106247563\C,-2.4869062535,-1.3678538656,-2.6947298888\C,-1.18  
92992267,-3.0367169505,-1.3796496357\C,-3.6681400606,-3.1794393155,-1.  
4258877416\H,-3.42079774,-0.8139346389,-2.8268026265\H,-1.6564891844,-  
0.6507780312,-2.7114688571\H,-2.3642819683,-2.0359601324,-3.5559502012  
\H,-1.0912259389,-3.6380193296,-0.4714198204\H,-1.1953183454,-3.725902  
3113,-2.2333173062\H,-0.2995782755,-2.4031860356,-1.4666912957\H,-3.57  
44298903,-3.8206068383,-2.3113159495\H,-3.6784938763,-3.8391009544,-0.  
5531774968\H,-4.6370544725,-2.6803110183,-1.5024864291\C,-3.653403582,  
0.3549873344,-0.3438573941\C,-4.9860786956,-0.0153297,-0.5938070075\C,  
-3.3231659928,1.7271002675,-0.3652864625\C,-5.9757014245,0.9241784068,  
-0.8497648542\H,-5.2632604531,-1.0620967788,-0.5829355091\C,-4.3388330  
821,2.662252178,-0.61231557\C,-5.6504150956,2.2759045381,-0.8523627073  
\H,-6.9938614387,0.5986284563,-1.0412676728\H,-4.0764758916,3.71645552  
29,-0.6243472905\H,-6.4110611068,3.0268248607,-1.0450259999\C,-1.96466  
43306,2.3163550058,-0.1711549148\C,-1.1027403211,2.475775926,-1.265167  
6576\C,-1.6137776868,2.8997893311,1.0524112704\C,0.0768160204,3.207165  
9871,-1.1391032631\H,-1.38372917,2.0596501451,-2.2292560184\C,-0.43030  
91323,3.6246100863,1.1794181604\H,-2.2895899453,2.8109096717,1.8990255  
338\C,0.4142429249,3.7867618038,0.0823411689\H,0.7156006598,3.34763330  
56,-2.0072820638\H,-0.1880910757,4.0949123715,2.129173925\H,1.31686346  
32,4.3854409244,0.1730387961\C,2.9227879373,-0.2247786579,-0.350768903  
1\C,3.0002350776,-1.6778348598,-0.765605126\C,2.6617399693,-0.64784594  
66,-1.7823314855\H,3.9919824739,-2.1197186739,-0.7946819308\H,2.211220  
5244,-2.3336146053,-0.4072297457\H,1.6407293165,-0.5795628387,-2.14752  
67265\H,3.4278908206,-0.3712704993,-2.5021125596\\Version=EM64L-G09Rev  
A.01\State=1-A\HF=-1795.4057537\RMSD=8.082e-09\RMSF=1.784e-06\Dipole=0  
.2440421,0.1450148,0.3794637\Quadrupole=35.5352137,-14.3814916,-21.153  
7221,4.8133485,2.0842521,0.1904346\PG=C01 [X(C34H41Au1P1)]\@

# IN7

1\1\GINC-SHI\_02\FOpt\RPBE1PBE\GenECP\C34H41Au1P1(1+)\YIN\14-Jul-2015\0  
\\#p opt genecp pbelpbe\\Title Card Required\\1,1\C,-0.2580375517,-1.1  
788517596,0.198568245\C,-0.227691131,0.0121480179,0.8988822061\C,1.102  
0367863,0.670477733,0.7476738707\H,-0.9211881128,0.2816642844,1.693825  
2313\C,1.965820742,-0.2781343653,-0.0876943243\C,1.5509704255,1.048357  
6796,-0.6439189361\H,0.800118527,1.0860334842,-1.4325308223\H,2.322373  
5007,1.8106784186,-0.7137663659\Au,-1.6869837646,0.3615586395,-0.84687  
37809\H,1.5085254637,1.2212514853,1.5905468739\C,3.4076900563,-0.52824  
04504,0.2089384286\C,3.797982433,-1.0837362226,1.4326546102\C,4.387705  
971,-0.2389267149,-0.7443009179\C,5.1393836618,-1.3387026036,1.6979316  
333\H,3.0430510146,-1.3099561209,2.1824254342\C,5.7309616052,-0.496851

5031,-0.4820235856\H,4.0940676018,0.1973415479,-1.6965452774\C,6.10876  
 83274,-1.0463343659,0.7398831284\H,5.4303835763,-1.7626276319,2.654950  
 8159\H,6.4825536751,-0.2652870036,-1.2314763072\H,7.1564660578,-1.2436  
 370648,0.9479188016\P,-3.2461442387,0.7835009474,-2.544818699\C,-4.443  
 6344018,-0.6847816499,-2.5892655255\C,-3.6742881268,-1.9452246586,-2.9  
 995004647\C,-4.9533663703,-0.8518546572,-1.150333253\C,-5.6573399286,-  
 0.5018665685,-3.506232352\H,-3.3852279144,-1.931600117,-4.0548724499\H  
 ,-2.7737576057,-2.0935934961,-2.3919013576\H,-4.3227710556,-2.81739899  
 75,-2.8521389093\H,-5.4792484729,0.0412575653,-0.7955891607\H,-5.66322  
 00026,-1.6877943864,-1.1229102282\H,-4.141637679,-1.077283845,-0.44911  
 81385\H,-6.2537215939,-1.4216767165,-3.467587815\H,-6.3019260513,0.315  
 6200562,-3.1725659623\H,-5.3887018062,-0.3354730924,-4.5527522294\C,-2  
 .2967230147,1.0788883349,-4.162804213\C,-1.7608636853,2.5146497492,-4.  
 0892994981\C,-1.1032392171,0.1127063359,-4.2111188366\C,-3.1091635566,  
 0.893501758,-5.4486383795\H,-2.5611813643,3.2595771924,-4.1248933506\H  
 ,-1.1740330548,2.6831616003,-3.1778062374\H,-1.0972731969,2.6886866199  
 ,-4.944931644\H,-1.4089064979,-0.9370046223,-4.2330735039\H,-0.5327166  
 41,0.3095435318,-5.1273033247\H,-0.4275879986,0.2518719052,-3.36060557  
 27\H,-2.4547711777,1.1109396355,-6.3017267935\H,-3.4644529508,-0.13383  
 38736,-5.570212371\H,-3.9610483556,1.5730674949,-5.5243527862\C,-4.285  
 9165236,2.2582675895,-2.2137695484\C,-5.2022546421,2.6622684749,-3.200  
 2805939\C,-4.2528036518,2.966569407,-0.9927117253\C,-6.0779061477,3.72  
 06926411,-2.9996914587\H,-5.2456166745,2.1339538308,-4.1449617215\C,-5  
 .1606506816,4.0189024184,-0.8020166339\C,-6.0644716411,4.3974686939,-1  
 .7852323668\H,-6.769824484,4.0066032059,-3.7862326749\H,-5.1329301957,  
 4.5580444284,0.1407130321\H,-6.7478839733,5.2220431868,-1.6050545018\C  
 ,-3.3100030661,2.7452810824,0.1434416411\C,-2.0070012923,3.2688097106,  
 0.0980044609\C,-3.7802084957,2.2185084605,1.3538861708\C,-1.2095184063  
 ,3.287037195,1.2418246337\H,-1.6473189736,3.7227318398,-0.8221277258\C  
 ,-2.9764558948,2.2263167123,2.4922555177\H,-4.7949065475,1.8325389625,  
 1.4083375565\C,-1.6951028891,2.7734867289,2.4425594081\H,-0.2170053021  
 ,3.726233409,1.1958327354\H,-3.3653336648,1.8319962155,3.42709143\H,-1  
 .0841424383,2.8133788669,3.3402503246\C,1.0526314791,-1.4558614381,-0.  
 4300730588\C,1.5502960322,-2.8908260744,-0.422012555\C,1.1959296059,-2  
 .2430038896,-1.71339242\H,2.6008076859,-3.0327361088,-0.1870790472\H,0  
 .8856231784,-3.6499252216,-0.0184940609\H,0.2887182094,-2.5547688774,-  
 2.2243467779\H,2.0079940901,-1.9402700834,-2.3695953164\H,-1.019742830  
 9,-1.9484889199,0.3086505259\\Version=EM64L-G09RevA.01\State=1-A\HF=-1  
 795.4552156\RMSD=5.141e-09\RMSF=4.056e-06\Dipole=-0.9622547,0.0432193,  
 -0.4954506\Quadrupole=16.8665594,-13.9324138,-2.9341456,-12.4347964,13  
 .4389325,-2.1361905\PG=C01 [X(C34H41Au1P1)]\@

IN8

1\1\GINC-SHI\_02\FOpt\RPBE1PBE\GenECP\C34H40Au1Br1P1(1+)\YIN\22-Jul-201

5\0\#p opt genecp pbelpbe\Title Card Required\1,1\C,0.1757398174,0.5053109068,-0.0270264843\C,0.1515897696,0.5140057895,1.3618016558\C,1.2252110505,-0.0161954711,2.1010982982\C,2.3259940273,-0.5448514958,1.4065608365\C,2.347308721,-0.5585817359,0.0198437096\C,1.2725775521,-0.0323877553,-0.6948686705\H,-0.664343537,0.9116637522,-0.5798733862\H,3.1563495024,-0.9434949189,1.9809646912\H,3.1994256416,-0.9795458643,-0.5044604024\H,1.2819732776,-0.0402147126,-1.780740361\C,1.2048760964,-0.0521484422,3.5327637076\C,1.0568648773,-0.2636351089,4.7461642734\C,0.7346833999,-0.8640414579,6.0239710637\C,0.1994347296,-2.2846754574,5.9500564551\C,1.5780726761,-2.046136164,6.4642832746\H,0.0875794897,-2.7376324266,4.9700198269\H,-0.5960440857,-2.5183580267,6.6523129288\H,1.7626139533,-2.1343719265,7.5316667774\H,2.4116456079,-2.3318544988,5.8306774381\C,0.1452555078,0.0570842582,7.0854703935\H,0.8471139698,0.88633608,7.2540269468\H,0.0850206338,-0.4962641463,8.0300261239\C,-1.2122014119,0.5764255297,6.7143544851\H,-1.2933413938,1.0621973803,5.7401822306\C,-2.2952043651,0.4626200954,7.4803426855\H,-2.2590447728,-0.0208007183,8.4548298591\H,-3.2596285489,0.8511786928,7.1661378716\Au,1.9523182478,1.8346491314,4.5535337222\P,2.5530959439,4.0856040741,4.748277115\C,1.5380057835,4.8291863817,6.1725678477\C,0.1336527457,4.2093114587,6.145471999\C,2.2360945538,4.3958193622,7.4683190193\C,1.3882418775,6.3539150353,6.1510437846\H,-0.4199155689,4.4460042587,5.232949062\H,0.1663964181,3.1202313286,6.2497997059\H,-0.4393321432,4.6061540254,6.9925619747\H,3.2228609017,4.8538746645,7.5836791196\H,1.6183161295,4.7025931598,8.320924211\H,2.3528437118,3.306205797,7.5220761095\H,0.7839082636,6.6484504128,7.0177617678\H,2.3392887332,6.8843377523,6.2375746213\H,0.8640569441,6.7087222087,5.2591500309\C,2.2226553866,4.864025667,3.050316764\C,2.9803001236,3.9910446051,2.038655582\C,0.7211843901,4.8003703204,2.7508716502\C,2.7151412303,6.3063916843,2.8949263708\H,4.0555734776,3.9626098217,2.2472078808\H,2.6031074404,2.9622434114,2.014878184\H,2.8479425685,4.4193768599,1.0373959493\H,0.1453973093,5.494704981,3.3706400136\H,0.5615441138,5.0921146458,1.7055282534\H,0.3094820922,3.7925621632,2.8779465759\H,2.4373991694,6.6511137191,1.8912491989\H,2.2617878039,6.9977836242,3.6100317748\H,3.8030063595,6.379546763,2.9728940744\C,4.3287744271,4.3995628739,5.0975905631\C,5.3148122269,3.3895959792,5.1270630251\C,4.7317653358,5.7330999464,5.288648472\C,6.65487765,3.7613695845,5.3092769322\C,5.0785911159,1.9210754739,5.0234991636\C,6.0613159412,6.0787208401,5.4890030302\H,3.9953957426,6.526415187,5.2696247262\C,7.0333200528,5.0847355082,5.488413247\H,7.4068923952,2.9776064979,5.3280177444\C,4.6501030348,1.1960481018,6.144329716\C,5.4614251591,1.2219912179,3.8736760699\H,6.3323949075,7.1197851073,5.6369145204\H,8.0798562907,5.3353457854,5.6349207707\C,4.6118697382,-0.1959901963,6.1145751347\H,4.3932597891,1.7279262175,7.0571231195\C,5.4146472112,-0.1707361873,3.8428810353\H,5.8236275514,1.7735493548,3.0098180872\C,4.9948382718,-0.882990067,4.9638559602\H,4.3072098815,-0.743

5435958,7.0018964853\H,5.7399252063,-0.6994579324,2.9506136944\H,4.991  
9042375,-1.969634804,4.9495716661\Br,-1.3438839782,1.2410444341,2.2418  
306271\\Version=EM64L-G09RevA.01\State=1-A\HF=-4365.8865695\RMSD=9.081  
e-09\RMSF=1.983e-06\Dipole=1.0001197,0.3888435,-0.0731834\Quadrupole=-  
8.6514478,7.7670553,0.8843924,5.9942917,-1.5640945,4.390811\PG=C01 [X(  
C34H40Au1Br1P1)]\@

## TS7

1\1\GINC-SHI\_02\FTS\RPBE1PBE\GenECP\C34H40Au1Br1P1(1+)\YIN\22-Jul-2015  
\0\\#p genecp pbelpbe opt=(calcf,ts,noeigen)\Title Card Required\\1,  
1\C,-1.3273491118,2.082979268,-3.189407149\C,-2.2568162169,1.821396730  
2,-2.03152374\C,-1.6455193563,3.1978718359,-2.2540287357\H,-0.33716088  
69,1.6392819713,-3.1481743081\H,-1.7778709093,2.0960857211,-4.17863312  
89\H,-2.3142764759,3.9851757322,-2.5916567027\H,-0.8810466577,3.514842  
2312,-1.5521774382\C,-1.8136263323,1.0628544076,-0.8409695499\C,-2.574  
0414999,0.7347296895,0.150908209\C,-2.8664289884,-0.0062835926,1.34195  
40382\C,-2.6113764038,0.5669578456,2.6016230293\C,-3.4099017315,-1.306  
0439511,1.2980945855\C,-2.8683719667,-0.132238395,3.7702084186\C,-3.67  
88427041,-2.0049378655,2.4689159986\C,-3.405849083,-1.4175166072,3.700  
8923083\H,-4.1004538129,-3.0027287092,2.4134484014\H,-3.6205826975,-1.  
9696607648,4.6112061223\C,-3.7270628048,1.5637323573,-2.3611896825\H,-  
3.8098833632,0.6661994037,-2.984286873\H,-4.1187161317,2.3995146013,-2  
.9583762555\C,-4.5477066981,1.3868991002,-1.1296506445\C,-4.3389460598  
,2.1124662105,-0.0038243052\H,-5.2950231099,0.5965190379,-1.1193165002  
\H,-4.9338519519,1.9424346337,0.8884928506\H,-3.6819316928,2.978416960  
4,-0.0002787684\Au,0.0991448966,0.2545080131,-0.5490836773\H,-2.193439  
4281,1.5682503191,2.631982631\H,-2.6589497927,0.3216896289,4.733792836  
1\P,2.1246392339,-0.9267172888,-0.4620205121\C,3.4401800201,-0.2379753  
679,0.6229050906\C,4.6194030834,-0.9879861301,0.7812750899\C,3.3054199  
904,0.9601862669,1.3578075536\C,5.6379474022,-0.591202046,1.636954807\  
H,4.7493219449,-1.907676162,0.225698941\C,4.3419245584,1.3389098114,2.  
2244609517\C,5.4955481399,0.5812624116,2.3700024477\H,6.5333247245,-1.  
1986667031,1.7299056003\H,4.2301334591,2.2632298264,2.784289353\H,6.27  
85328723,0.9083277464,3.0479542453\C,2.8379135095,-0.955462443,-2.2181  
27675\C,1.8474771946,-1.6765931247,-3.1395659729\C,2.9450709444,0.5156  
310287,-2.6433845738\C,4.224757634,-1.5893370233,-2.3620762753\H,1.829  
4121889,-2.7565111464,-2.962233057\H,0.8270595455,-1.289252083,-3.0328  
52756\H,2.1577280176,-1.5242811301,-4.1807246436\H,3.6392617447,1.0718  
792654,-2.0037466038\H,3.3299386843,0.5626237688,-3.6696350789\H,1.972  
5454104,1.0207837414,-2.6226543414\H,4.4978759246,-1.5749166745,-3.424  
478943\H,4.9911654563,-1.0251122445,-1.8238188054\H,4.2578225684,-2.63  
16864518,-2.0346389777\C,1.6964434976,-2.6467678723,0.2385730061\C,1.5  
460364623,-2.458310942,1.7543472723\C,0.3370896214,-3.0849151805,-0.32  
79147023\C,2.7108959024,-3.7582427349,-0.0461146634\H,2.497379388,-2.2

250076651,2.2413225425\H,0.8290740998,-1.6629723492,1.9939866993\H,1.1639211175,-3.3908442268,2.1878146534\H,0.3471498767,-3.2043727172,-1.4143147892\H,0.0776825267,-4.0575281776,0.1088401469\H,-0.4616438566,-2.3804270751,-0.0730772559\H,2.3469017149,-4.6818238743,0.4210054472\H,2.8172075034,-3.9613202275,-1.1158610476\H,3.6981326892,-3.5610682184,0.3777838535\C,2.1583400462,1.9134941181,1.3104931195\C,1.3020483776,2.0210807127,2.4128721125\C,2.0421866991,2.8493466338,0.2749223588\C,0.3527707692,3.0386317198,2.4781147116\H,1.4049301017,1.3181835961,3.2357821814\C,1.0967032888,3.8703480471,0.3446408905\H,2.7288745707,2.804823274,-0.5658234752\C,0.2491941664,3.9685986031,1.4463641732\H,-0.281458293,3.1268222693,3.3567253289\H,1.0492535623,4.6117554991,-0.4488470642\H,-0.4683228405,4.7819096975,1.512510271\Br,-3.7913032732,-2.1302435711,-0.3481346054\\Version=EM64L-G09RevA.01\State=1-A\HF=-4365.8690484\RMSD=6.543e-09\RMSF=3.075e-06\Dipole=-0.4062893,0.3051128,0.5274955\Quadrupole=16.0374075,-11.0485672,-4.9888403,-10.9044549,-2.0778327,-3.130065\PG=C01 [X(C34H40Au1Br1P1)]\@

# IN9

1\1\GINC-SHI\_02\FOpt\RPBE1PBE\GenECP\C34H40Au1Br1P1(1+)\YIN\21-Jul-2015\0\#p genecp pbelpbe opt\\Title Card Required\\1,1\C,-0.0280413314,-0.0496517638,-0.0028284626\C,-0.0050884103,-0.0342805131,1.538033235\C,1.2743416524,-0.0645408342,0.6566653592\H,-0.4020437457,-0.9590333537,-0.4625130366\H,-0.3885030462,0.8799390684,-0.4350932582\H,1.8514567578,0.8546961031,0.7048138876\H,1.8508903345,-0.9838385036,0.6827976945\C,-0.3458584441,-1.2356991584,2.2526571135\C,-0.8132668975,-0.8732940868,3.5800854026\C,-1.7716023313,-1.7305715774,4.3299560133\C,-1.4125835877,-2.3969612483,5.5056842286\C,-3.0881416143,-1.8892414809,3.8746998381\C,-2.3270590402,-3.173011655,6.2102489594\C,-4.0170641027,-2.6534953571,4.5715378701\C,-3.6331362972,-3.2949615878,5.7456608547\H,-5.0316972292,-2.7407903709,4.1978042762\H,-4.3598854513,-3.8865241741,6.2944966264\C,-0.4646946928,1.2096102112,2.2971515309\H,-1.3548492276,1.6367332459,1.8223869332\H,0.3027588559,1.9912076178,2.3389203999\C,-0.800151594,0.6775112219,3.6695754305\C,0.2649909855,-0.0735615591,4.3491700633\H,-1.5719471479,1.1523713787,4.2676161526\H,0.1977200083,-0.1910363831,5.4268472266\H,1.2753939644,-0.0708170579,3.9491798324\Au,-0.2400681776,-3.1425890626,1.5726806518\H,-0.3933167083,-2.3047485087,5.8711919419\H,-2.0213162527,-3.6742228689,7.1236294538\P,-0.4167945142,-5.3165898097,0.6195783223\C,1.0796478568,-6.382801421,0.717948707\C,0.9866196406,-7.6975318744,0.2294964407\C,2.3308116812,-5.9311337864,1.1919651068\C,2.0836995045,-8.5473897193,0.1852320128\H,0.0374211037,-8.0684567709,-0.1367202462\C,3.4328934561,-6.7962781482,1.1166256363\C,3.3212267675,-8.0879831908,0.6212766918\H,1.9698238904,-9.5580802496,-0.1953656207\H,4.3919828195,-6.4403232353,1.4824860595\H,4.1938980117,-8.733605863,0.5866341418\C,-0.7082727533,-5.0515217666,-1.2352433943\

C,-2.0177368975,-4.2753781444,-1.4196460585\C,0.4669210389,-4.18266622  
71,-1.7089448799\C,-0.7370468823,-6.3171594256,-2.0962481621\H,-2.8975  
450634,-4.8884023506,-1.2004249104\H,-2.058556408,-3.3773387593,-0.791  
5805478\H,-2.0963649996,-3.9578367333,-2.4668447816\H,1.4290455005,-4.  
6888308175,-1.5722655317\H,0.348072741,-3.976350112,-2.7799752995\H,0.  
5069861477,-3.223144863,-1.1803905095\H,-0.933636081,-6.0190550546,-3.  
133672776\H,0.222484679,-6.8411641704,-2.0870267924\H,-1.5246190854,-7  
.0174915987,-1.807397217\C,-1.8306083709,-6.2323978072,1.5047767788\C,  
-1.2376214468,-6.8091447218,2.7968379734\C,-2.897659542,-5.1948874884,  
1.8842767631\C,-2.5111407699,-7.347498062,0.7052170759\H,-0.511770083,  
-7.6045578718,2.6048287597\H,-0.7501652421,-6.0333457021,3.3998994263\  
H,-2.0511162708,-7.2298417439,3.4006081801\H,-3.3199038972,-4.68194657  
36,1.0156516276\H,-3.7193959436,-5.709660768,2.3983643794\H,-2.5022025  
339,-4.4357445957,2.5668723792\H,-3.2890369103,-7.7952281446,1.3361948  
2\H,-3.0060677863,-6.9707780245,-0.1944580261\H,-1.8333528225,-8.15569  
78872,0.4208533081\C,2.6104808221,-4.6089157735,1.8186835042\C,2.17654  
21656,-4.326141462,3.1213207695\C,3.468891708,-3.7026299824,1.18455901  
73\C,2.6034831584,-3.1713523776,3.7755100315\H,1.5442896368,-5.0424199  
464,3.6397404707\C,3.8882899233,-2.5448886643,1.8363941885\H,3.8301544  
083,-3.9238852257,0.1833272348\C,3.4626877518,-2.280153594,3.136667716  
4\H,2.2848733577,-2.9856477044,4.7978283662\H,4.5729726897,-1.86436415  
26,1.336927943\H,3.8204627962,-1.3960698876,3.6579125536\Br,-3.6456020  
489,-1.0533707251,2.2691627618\\Version=EM64L-G09RevA.01\State=1-A\HF=  
-4365.9204322\RMSD=7.161e-09\RMSF=6.469e-06\Dipole=0.7503152,0.1876021  
,0.079072\Quadrupole=-8.8009305,13.9720388,-5.1711083,3.257642,-5.7346  
065,9.6128472\PG=C01 [X(C34H40Au1Br1P1)]\\@

## TS8

1\1\GINC-SHI\_03\FTS\RPBE1PBE\GenECP\C34H40Au1Br1P1(1+)\YIN\22-Jul-2015  
\0\#p genecp pbelpbe opt=(calcf,ts,noeigen) geom=check\\Title Card R  
equired\\1,1\C,-0.0602831171,0.0588526021,-0.1014790076\C,0.0067879374  
,0.0749320585,1.4399268635\H,0.9217500389,0.0195407891,-0.5698531666\H  
,-0.7039654879,0.7943451216,-0.5772990978\H,-0.8797378579,0.5256964541  
,1.8832164049\H,0.9260570032,0.4062356502,1.921776516\C,-0.0839496924,  
-1.3572481091,1.1100120816\C,0.9233533515,-2.4441796844,1.2955208782\C  
,0.7743207883,-3.2899710923,0.0496680313\H,0.6432950341,-2.9921304594,  
2.2091093023\H,1.9333193521,-2.0510642517,1.4692435919\C,-0.3417161384  
,-2.6871258374,-0.810745442\C,1.0996269399,-2.6608805896,-1.2645165062  
\H,1.644888203,-1.7209842238,-1.2942424253\H,1.3571987817,-3.339236584  
2,-2.0730480595\C,-0.8429613225,-1.4506219841,-0.074246054\Au,-2.91264  
65106,-0.9478492916,-0.0962577682\H,0.8586188528,-4.3676264418,0.14112  
03799\C,-1.2997965068,-3.5670638366,-1.5439644981\C,-2.1208424258,-4.4  
997918613,-0.8980510135\C,-1.3820277726,-3.5027929329,-2.9398046569\C,  
-2.9777601172,-5.3377953291,-1.6058753848\C,-2.2415475585,-4.322207350

5,-3.6627290666\H,-0.7387331612,-2.7968753637,-3.4594035544\C,-3.03952  
5096,-5.2454942113,-2.9924375698\H,-3.5845883614,-6.0607753274,-1.0708  
984342\H,-2.2765023473,-4.2521461764,-4.7459347244\H,-3.7026538729,-5.  
9051796945,-3.5443417241\H,-5.1815839498,-0.4130306227,0.1966858264\C,  
-5.3169792116,0.0983375,2.0234267725\C,-4.9327430257,-1.1031171683,2.8  
949106713\C,-4.2794821318,1.2143757956,2.2166115827\C,-6.674776684,0.6  
418034803,2.4808152048\H,-5.7085546002,-1.8750652399,2.8986050205\H,-3  
.9885036885,-1.5605104862,2.5756422538\H,-4.8092195399,-0.7623259945,3  
.9305097388\H,-4.465455607,2.0666888251,1.5535454765\H,-4.3350430695,1  
.57550189,3.2510743854\H,-3.2602657164,0.8532977766,2.0373375153\H,-6.  
6185290852,0.8260146213,3.5609392999\H,-6.917326697,1.5944593788,2.002  
9732134\H,-7.4993843988,-0.0560116682,2.3159499517\C,-6.2517595188,-1.  
9180219475,-0.2655407164\C,-6.3735899996,-1.9138306786,-1.794874903\C,  
-5.4965467584,-3.1863477492,0.1508914532\C,-7.6497430352,-1.9647847086  
,0.3587391953\H,-6.9245896505,-1.0461314678,-2.1700269787\H,-5.3898746  
316,-1.9423664906,-2.2778252906\H,-6.914226592,-2.8164102241,-2.105405  
456\H,-5.365651847,-3.2710888287,1.2326518305\H,-6.0722212923,-4.05961  
89386,-0.1813994354\H,-4.5086237322,-3.2391783398,-0.3157589322\H,-8.1  
421209459,-2.8841543965,0.0180804777\H,-7.6186949472,-2.0059948343,1.4  
511871134\H,-8.290520817,-1.1350342494,0.0512806866\C,-5.8361890016,1.  
0244461249,-0.7539782813\C,-7.1846898413,1.3642907444,-0.5448063297\C,  
-5.0693209116,1.841663866,-1.6161360814\C,-7.7699415083,2.4788191538,-  
1.1302658341\H,-7.7968621252,0.7513297789,0.1033533817\C,-5.6733210942  
,2.9784927636,-2.1772605948\C,-7.0014308072,3.303694114,-1.9426689777\  
H,-8.8165863052,2.7004725288,-0.9439485206\H,-5.0784093747,3.598143520  
9,-2.8422949208\H,-7.4346851121,4.1860000367,-2.4045795397\C,-3.669769  
6417,1.6040436041,-2.0631015263\C,-3.3464432979,0.510715056,-2.8768945  
946\C,-2.6948247453,2.5860851149,-1.841718253\C,-2.0852896583,0.407501  
9662,-3.4600368039\H,-4.1058936995,-0.2340869793,-3.0966621901\C,-1.43  
43043686,2.4839997504,-2.4260854148\H,-2.9403666992,3.4498632754,-1.22  
8690303\C,-1.1276951898,1.3959566341,-3.2423162112\H,-1.8646235907,-0.  
4344173763,-4.1099695357\H,-0.6990535484,3.2671192301,-2.2605852947\H,  
-0.1545914699,1.3294236575,-3.7212770293\Br,-2.0950351865,-4.674042074  
1,0.9912390648\\Version=EM64L-G09RevA.01\State=1-A\HF=-4365.8927028\RM  
SD=9.096e-09\RMSF=2.384e-06\Dipole=0.775566,1.0382503,0.2635812\Quadru  
pole=18.4795974,-6.0254547,-12.4541427,-4.8485069,1.2239754,3.5366962\  
PG=C01 [X(C34H40Au1Br1P1)]\\@

# IN10

1\1\GINC-SHI\_03\FOpt\RPBE1PBE\GenECP\C34H40Au1Br1P1(1+)\YIN\20-Jul-201  
5\0\#\#p opt genecp pbelpbe\\Title Card Required\\1,1\C,-0.1787967279,-  
0.158654779,0.1891775568\C,-0.2440579736,-0.3524609706,1.7360509992\H,  
0.8471863823,-0.0822264073,-0.1869856943\H,-0.7768242411,0.6431342935,  
-0.2491615354\H,-0.8309946333,0.3510926248,2.3317265274\H,0.7566837277

, -0.4320855466, 2.1783675378\C, -0.820513337, -1.7433120867, 1.4589520072\C, -0.5968555923, -3.1712888089, 1.9122269246\C, -0.2117250502, -3.8552256478, 0.5988651705\H, -1.4713922003, -3.6261066441, 2.3879342701\H, 0.2210510805, -3.2144296899, 2.6430782563\C, -0.334488083, -2.87366278, -0.5804316819\C, 1.0186372589, -3.3408912348, -0.0775352259\H, 1.658075517, -2.6361526088, 0.4521766592\H, 1.553776652, -4.03016257, -0.7248048007\C, -0.7307703266, -1.5902564481, 0.0774047553\Au, -2.9128284572, -1.3641207233, 0.6739263745\H, -0.478466652, -4.896906916, 0.4513503227\C, -0.7422609357, -3.2524168131, -1.9645025476\C, -1.943568404, -3.8904488865, -2.2881417241\C, 0.1106079548, -2.9364007779, -3.0299781911\C, -2.2857988388, -4.2118714888, -3.5985692436\C, -0.216381292, -3.233948195, -4.3476191577\H, 1.0555729871, -2.4491676925, -2.8030172278\C, -1.4180791171, -3.8771963316, -4.6328008934\H, -3.2224072859, -4.719943405, -3.8029357433\H, 0.469332265, -2.9742969243, -5.1484989252\H, -1.6820236999, -4.1275121979, -5.655929018\P, -5.0041601237, -1.011027697, 1.7508416905\C, -4.7028108651, 0.2041604851, 3.1745985239\C, -3.745359642, -0.4339355942, 4.1857565032\C, -4.0288152729, 1.4305318047, 2.5442443971\C, -5.9778813409, 0.6726930057, 3.881631424\H, -4.2095910485, -1.2560459264, 4.7389804815\H, -2.8343827286, -0.8089246326, 3.7050541922\H, -3.448805909, 0.324300743, 4.9209174222\H, -4.6784390656, 1.9204161751, 1.8113991984\H, -3.8101851614, 2.1593512072, 3.334553284\H, -3.0858539956, 1.1741453748, 2.0482534148\H, -5.6934373877, 1.3846408664, 4.6662726171\H, -6.6557403163, 1.1939927712, 3.1996911969\H, -6.5243539284, -0.1400561174, 4.3651954547\C, -5.700149726, -2.6908804217, 2.312766056\C, -6.3891863121, -3.3168000563, 1.0927776272\C, -4.5116385893, -3.5813622908, 2.7077465308\C, -6.6703068942, -2.662635433, 3.5002282741\H, -7.3118189871, -2.7979367186, 0.8193442895\H, -5.7329938222, -3.3279250934, 0.2145209461\H, -6.6448911806, -4.3572828087, 1.3281419019\H, -3.9347973266, -3.1704650174, 3.5420359769\H, -4.8962088839, -4.5596876021, 3.0219710295\H, -3.8309843786, -3.7430487979, 1.8659733147\H, -7.0034355324, -3.6907553921, 3.688357116\H, -6.1948900944, -2.3067592003, 4.4186640029\H, -7.5697664267, -2.0689403029, 3.3232925496\C, -6.2683205071, -0.1848234042, 0.7048590322\C, -7.5985163982, -0.1495508176, 1.1547299759\C, -5.9438104665, 0.4999458781, -0.4868868613\C, -8.5921633563, 0.5292199666, 0.4618536402\H, -7.8696032649, -0.6527867323, 2.0747827334\C, -6.9569905463, 1.1971129664, -1.1620490434\C, -8.2670906875, 1.2132189925, -0.7040758282\H, -9.6107287826, 0.5282364916, 0.8382939209\H, -6.6993917099, 1.7188399011, -2.0794981879\H, -9.0288157547, 1.7544928892, -1.2574720069\C, -4.6008807605, 0.5554607439, -1.1264629955\C, -4.0461010489, -0.5742470267, -1.7552991475\C, -3.9490793409, 1.7862698759, -1.2592368719\C, -2.8804967202, -0.4559028724, -2.5203367348\H, -4.5878108241, -1.5174951339, -1.7365582133\C, -2.7793282169, 1.8963286131, -2.008356517\H, -4.3783829563, 2.6682684997, -0.7910785369\C, -2.2468485488, 0.7780442148, -2.6457615902\H, -2.493073856, -1.3240794273, -3.0436041696\H, -2.2972117155, 2.8646266002, -2.112053199\H, -1.3519500805, 0.8693927698, -3.2547249939\Br, -3.1932436819, -4.3514081567, -0.9340873396\\Version=EM64L-G09RevA.01\

State=1-A\HF=-4365.9231981\RMSD=2.796e-09\RMSF=5.413e-06\Dipole=0.1099  
365,0.8066502,0.4588814\Quadrupole=12.6405911,-13.3567731,0.716182,-7.  
6200438,-12.2312843,2.1320057\PG=C01 [X(C34H40Au1Br1P1)]\@

### TS9

1\1\GINC-SHI\_02\FTS\RPBE1PBE\GenECP\C34H40Au1Br1P1(1+)\YIN\18-Aug-2015  
\0\#p opt=(calcf,ts,noeigen) genecp pbelpbe\Title Card Required\1,  
1\C,-2.4659755218,-2.7087891819,2.72442306\C,-1.9397748602,-1.96059658  
4,3.9997373899\H,-3.4954102574,-3.0762453171,2.8010420797\H,-1.8195192  
889,-3.5261204259,2.3847763859\H,-1.0028579831,-2.3510949977,4.4133869  
942\H,-2.6756982614,-1.8855628426,4.8076144805\C,-1.8217116255,-0.7547  
309761,3.0997260787\C,-1.4420176786,0.681733225,2.9742090313\C,-1.8480  
113985,1.0467260814,1.5527439414\H,-0.3803676622,0.876046048,3.1703867  
593\H,-2.0195585047,1.3122205924,3.6701734121\C,-2.5406346115,-0.56919  
06959,0.7928953655\C,-3.2572458059,0.6824239467,1.1935830193\H,-3.9470  
289476,0.5605839806,2.0311669873\H,-3.6845616544,1.267527564,0.3840401  
853\C,-2.2904840065,-1.377208094,2.0118096309\Au,-0.1589930243,0.02018  
26599,0.3280463203\H,-1.4639929947,1.9592203362,1.0884648114\C,-2.7082  
632698,-1.175357146,-0.5605949396\C,-2.9113848139,-2.5659717316,-0.611  
4259325\C,-2.7886791741,-0.4879204968,-1.7859066297\C,-3.2124596783,-3  
.227702567,-1.7948922661\H,-2.8564866451,-3.1361317324,0.3083632815\C,  
-3.0863719323,-1.1423907308,-2.9761821803\C,-3.3074151351,-2.515019238  
, -2.9847934983\H,-3.3791664178,-4.300529179,-1.7806903106\H,-3.1397192  
383,-0.5691547783,-3.8956773702\H,-3.5485144854,-3.0164383493,-3.91700  
27818\H,1.9098262142,-0.7544905715,-0.4269023004\C,1.7541064809,-1.255  
6369814,-2.2474810853\C,0.7216267686,-2.3823879286,-2.3605947424\C,1.2  
352600738,-0.0110510001,-2.9798023153\C,3.0594617756,-1.690471695,-2.9  
224806686\H,1.091713896,-3.326043042,-1.9465655103\H,-0.2257995461,-2.  
1317019707,-1.8710139213\H,0.5077711985,-2.5564337036,-3.4222983882\H,  
1.9478894415,0.8191709839,-2.9176895303\H,1.1083042723,-0.2556207766,-  
4.0418000992\H,0.26777344,0.3266303923,-2.5939080148\H,2.8238148439,-1  
.990722085,-3.9509830339\H,3.7814406146,-0.8719246302,-2.9838380167\H,  
3.5342345543,-2.5472862296,-2.4377924704\C,2.3801409138,-2.1845923733,  
0.7438642672\C,2.9418745829,-1.5359199292,2.0162137442\C,1.1001462404,  
-2.9455364477,1.1187049449\C,3.3891781597,-3.1956850419,0.1899116344\H  
,3.9189247717,-1.0735353719,1.8511464721\H,2.2635095476,-0.7715373855,  
2.4160779648\H,3.0589727552,-2.3106631085,2.783957031\H,0.5845767453,-  
3.3656423926,0.2505345657\H,1.3710363792,-3.7777682376,1.7806960653\H,  
0.3955284984,-2.3009084079,1.6549743407\H,2.9999801917,-3.7407119357,-  
0.6751650625\H,4.3496730056,-2.7490431125,-0.0770331468\H,3.593406846,  
-3.9374399563,0.9719449757\C,3.2893130369,0.4582047364,-0.3323516972\C  
,4.5798255871,-0.0100645271,-0.6395511339\C,3.1481613117,1.7956975027,  
0.0973579077\C,5.7045650299,0.7960667798,-0.5314479345\H,4.7176964674,  
-1.0321534422,-0.9684047068\C,4.2990427149,2.5915320443,0.2082015337\C

,5.5632427581,2.1097137255,-0.0997800337\H,6.6826567403,0.3950002714,-  
0.779927145\H,4.1806697401,3.6204688193,0.5359122203\H,6.4297081945,2.  
7576187693,-0.0052022559\C,1.8812809805,2.4994202224,0.4522550523\C,1.  
647755753,2.8624846726,1.7859223435\C,1.0273092172,2.9983354789,-0.539  
9817325\C,0.5875489626,3.7011117617,2.1200479719\H,2.3243045451,2.5060  
947488,2.559030725\C,-0.0255864324,3.8479749217,-0.2067851388\H,1.2165  
297599,2.7550023899,-1.5814552789\C,-0.2480333558,4.2037595363,1.12266  
5022\H,0.4318186277,3.9867690466,3.1569008117\H,-0.6582363416,4.253529  
0303,-0.9917744048\H,-1.0546628515,4.8854314947,1.3780548488\Br,-2.416  
125234,1.3660065858,-1.9359099802\\Version=EM64L-G09RevA.01\State=1-A\  
HF=-4365.8903277\RMSD=4.722e-09\RMSF=5.196e-06\Dipole=0.4938023,-0.860  
6551,0.5041696\Quadrupole=8.2003565,-2.598631,-5.6017256,4.338145,-3.5  
283402,6.254315\PG=C01 [X(C34H40Au1Br1P1)]\\@

# IN11

1\1\GINC-SHI\_02\FOpt\RPBE1PBE\GenECP\C34H40Au1Br1P1(1+)\YIN\18-Jul-201  
5\0\#\#p opt genecp pbelpbe\\Title Card Required\\1,1\C,-0.2799029662,-  
0.0396633283,-1.3053856416\C,-0.1338343562,0.7664774091,0.0259001929\H  
,0.6516230771,-0.2219718875,-1.8499300237\H,-1.0191570885,0.3809831788  
,-1.9937432072\H,-0.7551902192,1.6654488564,0.1232940173\H,0.893600886  
7,1.0351651218,0.3000741489\C,-0.6663175071,-0.4415088856,0.7347376314  
\C,-0.9820974662,-0.913184863,2.0832378062\C,-1.8838955014,-2.14964548  
31,1.9486040136\H,-1.4037313725,-0.1183829886,2.7097707924\H,-0.001438  
446,-1.1643411063,2.5490140696\C,-1.0179971132,-2.5593538026,-0.418881  
7401\C,-1.2465322652,-3.1309208599,0.9477499572\H,-0.2430925397,-3.447  
6645376,1.3044014002\H,-1.8296829279,-4.0525565125,0.8758081071\C,-0.7  
6513735,-1.1830391533,-0.4278484308\Au,-3.8778240944,-1.6839617383,1.4  
969635613\H,-1.9149088008,-2.6629683154,2.9170786545\C,-1.035676912,-3  
.3299089723,-1.6468779802\C,-1.4849042949,-2.6541718638,-2.8078981416\  
C,-0.7001437499,-4.700373001,-1.7897855002\C,-1.6398877427,-3.29645713  
3,-4.0220925171\H,-1.7651596044,-1.6108662466,-2.7200326189\C,-0.82767  
00996,-5.336405852,-3.0193802115\C,-1.3064265387,-4.6455040718,-4.1276  
972861\H,-2.013919916,-2.7512709943,-4.8826352181\H,-0.5429872149,-6.3  
793081085,-3.1049308334\H,-1.4095133858,-5.1656587496,-5.075462034\P,-  
6.1224649266,-1.2252756038,0.885489432\C,-6.7292717119,-2.6932964134,-  
0.152931841\C,-5.8628149856,-2.7884828572,-1.4140856104\C,-6.47940748,  
-3.9311768881,0.7211357335\C,-8.207995999,-2.683179818,-0.5498867672\H  
,-6.0823808279,-1.987254625,-2.1278176583\H,-4.7929283662,-2.762354181  
2,-1.1743846424\H,-6.0733270221,-3.7400155979,-1.9188705419\H,-7.06750  
15739,-3.8971081493,1.6448990847\H,-6.7837515953,-4.8281002857,0.16671  
70832\H,-5.4218008453,-4.0348592441,0.9897746128\H,-8.403581959,-3.568  
1077196,-1.1688428007\H,-8.8647565978,-2.7475820626,0.3218178423\H,-8.  
4908729049,-1.8067957851,-1.1392715279\C,-6.1600289583,0.4365332299,-0  
.0467877097\C,-6.1136951344,1.5284985122,1.0307184294\C,-4.8771244974,

0.5409827836,-0.8851617433\C,-7.3537233985,0.6789411056,-0.9748513378\H,-7.0331025024,1.5665512981,1.6219983452\H,-5.2701195295,1.381637446,1.7166021212\H,-5.9833593936,2.5038763747,0.545077532\H,-4.8257777539,-0.2188827304,-1.6706181278\H,-4.8530118665,1.5254051691,-1.3705585563\H,-3.9851504748,0.4401111702,-0.257322393\H,-7.395446752,-0.0449410493,-1.7942768431\H,-8.3138806807,0.6747997773,-0.4535448431\H,-7.2451746426,1.6728361329,-1.4277848895\C,-7.3397460736,-1.071896818,2.2607290108\C,-8.6680012863,-0.7273998007,1.9554339981\C,-6.999814042,-1.289446587,3.6135644078\C,-9.6422427203,-0.602050687,2.9367852154\H,-8.9539403641,-0.5572474452,0.9252283873\C,-7.9990752983,-1.1675645411,4.5902273231\C,-9.3057037054,-0.8286506328,4.2666290468\H,-10.6572286115,-0.3320098745,2.6600909847\H,-7.7269840531,-1.3402683306,5.6277588707\H,-10.0539180066,-0.7395533759,5.0489710665\C,-5.6444308187,-1.6341359058,4.137018579\C,-4.7651043865,-0.6204469556,4.5377402195\C,-5.3041199988,-2.965357944,4.4019280146\C,-3.5707766435,-0.9328394387,5.183202501\H,-5.0372058655,0.4181359197,4.3674532237\C,-4.1079323272,-3.2773432191,5.0437986902\H,-5.9927362377,-3.7583162596,4.1220623266\C,-3.2400960946,-2.2619897222,5.4397169367\H,-2.9105964815,-0.1334187723,5.5100074504\H,-3.8654244888,-4.3154308533,5.2545896719\H,-2.3201178118,-2.5043484827,5.9649271077\Br,0.0407103136,-5.740762459,-0.4091093469\Version=EM64L-G09RevA.01\State=1-A\HF=-4365.9027782\RMSD=9.513e-09\RMSF=2.931e-06\Dipole=1.3668714,0.7601838,-2.1219022\Quadrupole=11.8735477,-14.4481223,2.5745746,-3.984334,-14.2284781,7.6164572\PG=C01 [X(C34H40Au1Br

## TS11

1\1\GINC-SHI\_02\FTS\RPBE1PBE\GenECP\C34H40Au1Br1P1(1+)\YIN\21-Aug-2015  
 \0\#\#p opt=(calcf,ts,noeigen) genecp pbelpbe\Title Card Required\1,  
 1\C,3.6108927653,-2.8064671998,-1.8659974995\C,3.0576045191,-2.5512903643,-3.3123627795\H,4.6990605315,-2.8742238431,-1.7792055166\H,3.1650954545,-3.6863023089,-1.3900148504\H,2.4243653795,-3.3311399131,-3.745006247\H,3.8307804746,-2.2834805118,-4.0393047308\C,2.3600406242,-1.3254597474,-2.750868426\C,1.1540752501,0.6177543776,-1.8822367758\H,1.0311500145,-1.497643001,-2.6487879227\H,0.9157950503,-0.2077942185,-3.9616911591\C,1.396268051,-0.3238136082,-2.9898944291\C,3.0392713581,-0.477121322,-0.5503115475\C,2.392209625,0.835043892,-0.9965329002\H,3.1569480178,1.4199423866,-1.5308628039\H,2.1142367783,1.4318091356,-0.1248826053\C,2.9976184442,-1.4742086295,-1.4673725862\Au,-0.5571528554,-0.0448372622,-0.8089679481\H,0.7949936477,1.5738853912,-2.2781291929\C,3.6945866715,-0.6585020401,0.7538798265\C,3.4649512803,-1.8728596417,1.4283860113\C,4.5245226863,0.279765898,1.393417145\C,4.0076702381,-2.1359943388,2.6771957534\H,2.8155798035,-2.6052048257,0.9575010272\C,5.0778853871,0.0209616808,2.6435935623\C,4.8152927349,-1.181706946,3.2897355636\H,3.799733343,-3.0800647003,3.1714670903\H,5.7245226339,0.7624940858,3.1003272292\H,5.249392704,-1.3702343536,4.2670963408\Br,-2.4130275

409,-0.8868243252,0.3706013588\C,-1.7737343689,-1.7399665115,1.9368465  
167\C,-0.9008511294,-2.9294724298,1.522180113\C,-0.8946623306,-0.69711  
30958,2.641671024\C,-2.8423043894,-2.2094813483,2.9284638214\H,-1.4904  
845416,-3.7501907926,1.1013198598\H,-0.135855211,-2.6354588336,0.79335  
73685\H,-0.3886489378,-3.3188327178,2.4109520588\H,-1.4730747166,0.185  
0947367,2.9378399327\H,-0.4779239039,-1.1405995342,3.5547379421\H,-0.0  
592029176,-0.3723835163,2.0105340752\H,-2.3390911741,-2.7159039256,3.7  
618078433\H,-3.4021449065,-1.3711372909,3.3513954482\H,-3.5488277684,-  
2.9231377258,2.4961638915\C,-3.3719598425,-2.0378887947,-0.8048901949\  
C,-4.1765257229,-1.1183252649,-1.7348346716\C,-2.3615302409,-2.8156601  
411,-1.6629141049\C,-4.311592835,-3.0493989502,-0.1422236737\H,-4.9843  
630872,-0.6013033197,-1.2091211806\H,-3.5375540945,-0.363262814,-2.209  
5887736\H,-4.6241791481,-1.7250891199,-2.5317311501\H,-1.7154284292,-3  
.4696416713,-1.0706474452\H,-2.9152434592,-3.4477490334,-2.3687214258\  
H,-1.7255513871,-2.1378368578,-2.2431109782\H,-3.7776340932,-3.7615451  
168,0.4940412417\H,-5.1042557772,-2.5782151277,0.4433176217\H,-4.80573  
90167,-3.6295849025,-0.9316683341\C,-3.6177305231,0.3891610313,0.92352  
3102\C,-4.7979287048,-0.0350618774,1.5596905638\C,-3.4515548826,1.7691  
271807,0.6710419149\C,-5.7948961572,0.8555235268,1.9345168467\H,-4.950  
1550771,-1.0870779224,1.7659667897\C,-4.4740931817,2.6516832812,1.0497  
520455\C,-5.6334966697,2.2113659302,1.672982747\H,-6.6923084673,0.4879  
952506,2.4234040944\H,-4.3371511579,3.7111111091,0.8519280913\H,-6.403  
1991207,2.9240732294,1.9545027419\C,-2.2694342529,2.4177803796,0.03145  
32502\C,-2.3808239414,2.9406817028,-1.2630248361\C,-1.1050884653,2.681  
9669728,0.7660640022\C,-1.3511364275,3.7006538375,-1.813679674\H,-3.29  
1365037,2.7657558061,-1.8306543421\C,-0.0807622976,3.4521936731,0.2186  
390765\H,-1.0219574743,2.3167297008,1.7860419689\C,-0.2009613486,3.963  
7671037,-1.0720948706\H,-1.4606151102,4.1098819519,-2.8144086614\H,0.8  
019001295,3.6731773492,0.8131416597\H,0.5886570617,4.582594484,-1.4895  
127595\Br,5.0268064632,1.9059616523,0.5730934354\\Version=EM64L-G09Rev  
A.01\State=1-A\HF=-4365.8732886\RMSD=4.002e-09\RMSF=3.936e-06\Dipole=-  
0.1915575,-1.8412747,-0.7763352\Quadrupole=13.3976792,-9.3488527,-4.04  
88265,-7.3182566,-5.5094047,0.8748628\PG=C01 [X(C34H40Au1Br1P1)]\\@

# IN13

1\1\GINC-SHI\_02\FOpt\RPBE1PBE\GenECP\C34H40Au1Br1P1(1+)\YIN\15-Jul-201  
5\0\\#p opt genecp pbelpbe\\Title Card Required\\1,1\C,-0.0270086795,-  
0.0070627527,-0.4694301033\C,-0.2342796739,0.251910642,1.0515671847\H,  
0.9964460711,-0.0442944332,-0.8513939985\H,-0.6123613535,0.694375497,-  
1.0758684033\H,-0.5282975646,1.2585048058,1.3601734243\H,0.636199453,-  
0.0746183536,1.6279632898\C,-1.3498627105,-0.8383911251,1.0399674583\C  
,-1.3243877839,-3.2269301195,1.729249808\H,-1.2970455521,-1.6195047284  
,3.1446565524\C,-1.4147923989,-1.9005821049,2.0962870502\C,-0.51061919  
9,-2.5970390364,-0.568077491\C,-1.1405374833,-3.676178514,0.2940539825

\H,-0.5020470815,-4.5663225134,0.2974237967\H,-2.0968733642,-4.0034250  
 459,-0.1400299991\C,-0.7259088477,-1.3223894959,-0.24335655\Au,-3.5280  
 757206,-2.7720160619,2.2615647965\H,-1.1439891438,-3.9725782808,2.5046  
 874327\C,0.3488624135,-3.0026762402,-1.7040458298\C,-0.0625160107,-2.7  
 490700827,-3.018537552\C,1.5849569825,-3.6393644113,-1.5288529972\C,0.  
 714477422,-3.1249487953,-4.1088906513\H,-1.0161277115,-2.2514221507,-3  
 .1724881319\C,2.3713488507,-4.025140651,-2.6078755165\C,1.9299366299,-  
 3.7701243315,-3.9027282846\H,0.3695081635,-2.9160912069,-5.117137107\H  
 ,3.3255695146,-4.5100061745,-2.431681481\H,2.5439842361,-4.0716877403,  
 -4.7461495752\P,-5.8252996435,-3.2035753662,2.313013257\C,-6.051921395  
 1,-5.0837021044,2.3263297868\C,-5.4746215988,-5.6600961779,1.029374201  
 7\C,-5.2332982406,-5.5993384159,3.5179756709\C,-7.498089982,-5.5585558  
 601,2.5045540828\H,-6.0822449454,-5.4052449079,0.1559984204\H,-4.44618  
 59995,-5.3239116781,0.8506959202\H,-5.4580420374,-6.7539292296,1.10632  
 23121\H,-5.60892084,-5.2058233374,4.4689463173\H,-5.3173756256,-6.6923  
 03303,3.5566065296\H,-4.1700117615,-5.3473225887,3.429310742\H,-7.5024  
 978368,-6.6546982386,2.4630208283\H,-7.9045620042,-5.271372425,3.47806  
 65031\H,-8.1718682101,-5.2038919804,1.7202625043\C,-6.5843142689,-2.32  
 13541445,0.8084810915\C,-6.7072703923,-0.8416421729,1.1962137219\C,-5.  
 6040369853,-2.4337454899,-0.3694551555\C,-7.9459916443,-2.8546378927,0  
 .3530117146\H,-7.4654739614,-0.6748455805,1.9664617505\H,-5.7546343229  
 ,-0.4344280937,1.5579246569\H,-6.9956142057,-0.2682902422,0.3068752408  
 \H,-5.4270393771,-3.4669212069,-0.6809902996\H,-6.0288133119,-1.898713  
 285,-1.2277602381\H,-4.6357358126,-1.9761412185,-0.1373150001\H,-7.892  
 1680378,-3.8912088157,0.007865421\H,-8.7182299588,-2.7771787507,1.1219  
 930729\H,-8.2838957985,-2.2489338109,-0.4966481665\C,-6.6629601824,-2.  
 5493491804,3.8080776073\C,-8.0631647596,-2.6604184489,3.8729599089\C,-  
 5.9883375316,-1.8860738359,4.8573041173\C,-8.7939227109,-2.1350891872,  
 4.9297652486\H,-8.6006723518,-3.1649290681,3.0795833537\C,-6.747309460  
 8,-1.3546110223,5.9106452088\C,-8.1297670368,-1.4723778043,5.955761632  
 \H,-9.8744755215,-2.2411651792,4.9458526221\H,-6.2237612685,-0.8474344  
 797,6.7161413217\H,-8.6829202924,-1.051137205,6.7900392669\C,-4.514422  
 4791,-1.6858944282,4.9891231952\C,-3.97591522,-0.3990829103,4.84847347  
 45\C,-3.6817747235,-2.714959888,5.4537086819\C,-2.6437327431,-0.145763  
 2151,5.1695032236\H,-4.6186595237,0.4124211438,4.5165095048\C,-2.35010  
 89502,-2.4597998521,5.7774302484\H,-4.0932742606,-3.7082875242,5.60828  
 48356\C,-1.8295140442,-1.1732022405,5.6436206573\H,-2.2498415976,0.862  
 4065086,5.0740282722\H,-1.7282810134,-3.2623460925,6.1648916641\H,-0.8  
 003060451,-0.9688706178,5.9258806956\H,-2.3241996437,-0.3532123386,0.8  
 837203663\Br,2.2639721916,-3.9427042729,0.2161162775\\Version=EM64L-G0  
 9RevA.01\State=1-A\HF=-4365.9473278\RMSD=7.621e-09\RMSF=2.287e-06\Dipo  
 le=-2.3949608,0.3016699,0.5226874\Quadrupole=14.9970858,-17.6367705,2.  
 6396848,3.0998385,-17.3279641,4.4419754\PG=C01 [X(C34H40Au1Br1P1)]\\@

**TS10**

1\1\GINC-SHI\_03\FTS\RPBE1PBE\GenECP\C34H40Au1Br1P1(1+)\YIN\21-Jul-2015  
\\#p opt=(calcf,ts,noeigen) geom=check genecp pbelpbe\\Title Card R  
equired\\1,1\C,0.0207641153,0.0001854968,0.0327614005\C,-0.0092947329,  
-0.0380072985,1.5680590105\H,1.032845233,0.0235639994,-0.3634184235\H,  
-0.6902728777,0.6431294922,-0.4797942231\H,-0.9187441345,0.3020966924,  
2.0587290918\H,0.9122653498,0.26021801,2.0542560698\C,0.2647082352,-1.  
8228616459,1.5707772198\C,-0.7040274917,-2.6162133221,2.4469693213\C,-  
2.0280428093,-2.6431539145,1.70356348\H,-0.7911121004,-2.1359242758,3.  
4292088668\H,-0.3199063114,-3.6261104241,2.6291144828\C,-1.9146843959,  
-1.7062111512,0.5011912833\C,-1.9991708202,-3.2237161537,0.3387175466\H,  
-1.1114364107,-3.7556185046,0.004172536\H,-2.9372951006,-3.57822494,  
-0.0781181854\C,-0.4899752918,-1.2899073448,0.4916148998\Au,2.30754479  
02,-2.1893038043,1.665829278\H,-2.9597552857,-2.6661736808,2.258882448  
7\C,-2.9853088265,-0.8354145311,-0.0656032871\C,-3.7755397562,0.049395  
356,0.6798105236\C,-3.2116500557,-0.8848941287,-1.4484082047\C,-4.7521  
299873,0.8384808023,0.0774125359\C,-4.1738840623,-0.0961439333,-2.0653  
803642\H,-2.6151518706,-1.5744531733,-2.0410834766\C,-4.949344164,0.76  
71799839,-1.2965439686\H,-5.3522157231,1.5041227583,0.6883609247\H,-4.  
3242089653,-0.1618790813,-3.1386052791\H,-5.71272235,1.3847400209,-1.7  
601813008\H,4.5951371737,-2.5690377632,2.0869222098\C,4.6914787639,-3.  
8476028467,3.4830877852\C,4.0389201318,-3.2527081201,4.7364200885\C,3.  
8584555393,-5.0440665946,3.0012216056\C,6.0947001488,-4.3550712133,3.8  
266462956\H,4.6582472352,-2.4768153114,5.197177878\H,3.0494499178,-2.8  
299074493,4.5252933156\H,3.9105644463,-4.0485422197,5.4805556019\H,4.2  
783050035,-5.4897166917,2.0924090991\H,3.8611296514,-5.8166153576,3.78  
02464646\H,2.8169369231,-4.7650327919,2.8035722069\H,6.0097005434,-5.0  
539334379,4.6680179914\H,6.5454150694,-4.9026042102,2.9944836327\H,6.7  
769265904,-3.5587983031,4.1357982908\C,5.3742118676,-0.8858017969,2.52  
30569364\C,5.6151925817,-0.1695079725,1.1869077366\C,4.3558478121,-0.0  
666493103,3.3302326263\C,6.6802916755,-0.93812849,3.32119252\H,6.40267  
32327,-0.6459466837,0.5960722615\H,4.7038788441,-0.1315487935,0.576794  
191\H,5.9225297573,0.8638460917,1.3897621333\H,4.1021705983,-0.5278276  
304,4.2882178977\H,4.7874363844,0.9199297323,3.540202023\H,3.426482672  
9,0.0835124715,2.7699440334\H,7.0259142908,0.0905006812,3.483443878\H,  
6.5480929591,-1.3913030271,4.3081143937\H,7.4841947186,-1.4599629081,2  
.7970344644\C,5.5872385091,-3.2423715884,0.691884115\C,6.9718049262,-3  
.4080866424,0.8737336475\C,5.038700232,-3.543003491,-0.5736057862\C,7.  
8020991924,-3.8493800731,-0.1478017324\H,7.4189896095,-3.1865338895,1.  
8344601327\C,5.8942767763,-3.9815774163,-1.5949787681\C,7.2589696451,-  
4.13615244,-1.3950506138\H,8.8666541644,-3.9649360885,0.0331475123\H,5  
.4614796798,-4.2123974977,-2.5643801515\H,7.891765606,-4.4809175171,-2  
.207639172\C,3.6005061604,-3.4525304447,-0.9606167292\C,3.1698744623,-  
2.4166624806,-1.7991164811\C,2.7103370952,-4.4911511015,-0.6614866702\

C,1.8805826106,-2.4191189109,-2.3264855675\H,3.8643333822,-1.622293453  
6,-2.0613951224\C,1.4239780482,-4.4977872286,-1.1964600411\H,3.0428765  
282,-5.3187586219,-0.0412990061\C,1.0070812123,-3.4642165641,-2.032969  
7683\H,1.5710303362,-1.6202515957,-2.9954351478\H,0.7597396759,-5.3315  
567851,-0.983102484\H,0.0147155101,-3.4866689065,-2.4759546419\Br,-3.5  
822601036,0.2261301676,2.5591074516\\Version=EM64L-G09RevA.01\State=1-  
A\HF=-4365.9002914\RMSD=5.950e-09\RMSF=4.631e-06\Dipole=0.3883922,0.21  
375,-0.6033856\Quadrupole=32.0090178,-19.3933408,-12.615677,-16.216078  
8,15.2663936,-3.4087824\PG=C01 [X(C34H40Au1Br1P1)]\@

## IN12

1\1\GINC-SHI\_02\FOpt\RPBE1PBE\GenECP\C34H40Au1Br1P1(1+)\YIN\20-Jul-201  
5\0\#p opt genecp pbelpbe\\Title Card Required\\1,1\C,0.0429035596,0.  
0975456818,-0.038543622\C,0.0610457601,0.2339057204,1.4476269463\C,1.5  
053457073,0.1894476344,1.8979835646\H,-0.5185234719,-0.6188531141,1.84  
10186403\H,-0.4963729773,1.1269851692,1.7644415511\C,2.3545398595,-0.1  
383969132,0.685809914\C,2.4403440111,1.2182036237,1.3365914579\H,2.027  
0764339,2.0707333054,0.799619007\H,3.3287101328,1.4380625331,1.9219500  
572\Au,-1.6573045439,0.2177117655,-1.1246392307\H,1.7428276881,-0.2512  
41521,2.8609213128\C,3.5040547479,-1.0837472997,0.7131785835\C,3.34535  
96323,-2.4578964925,0.9424165995\C,4.8039198688,-0.61928715,0.48202956  
55\C,4.4280934228,-3.330438297,0.948603038\C,5.8980066701,-1.477683388  
3,0.4839960878\H,4.9491890671,0.4437783491,0.3066007014\C,5.7084573474  
,-2.8360586527,0.7184596351\H,4.2669503082,-4.3862457147,1.1385709711\  
H,6.89490918,-1.0860882642,0.3059327069\H,6.554172393,-3.517153289,0.7  
278270348\Br,-3.719631464,0.0434954521,-2.2953435819\C,-5.0193181453,-0  
.546929726,-1.0488419783\C,-4.6193509489,-1.9385877611,-0.5440524053\C  
,-4.9574486375,0.448474506,0.1185292236\C,-6.4621538736,-0.5829572433,  
-1.5620339813\H,-4.7496882641,-2.7113368079,-1.3082125606\H,-3.5810401  
383,-1.9680315999,-0.1926201593\H,-5.2652647232,-2.2065956302,0.301077  
8067\H,-5.2257374936,1.4617900079,-0.200122219\H,-5.6795622077,0.14101  
30166,0.8850294901\H,-3.9652778876,0.4784138662,0.5841004561\H,-7.1003  
452625,-0.9698041367,-0.7578438882\H,-6.8314512721,0.4148089764,-1.814  
4061283\H,-6.5982423074,-1.2397998905,-2.4252635661\C,-3.4551995668,-1  
.1407581635,-3.7611093693\C,-2.7681941167,-0.3189611627,-4.8598930696\  
C,-2.4930633485,-2.2524244565,-3.316173654\C,-4.718608902,-1.798997115  
4,-4.3234889138\H,-3.432814396,0.4354415014,-5.2903591474\H,-1.8691869  
94,0.1877129992,-4.4872226161\H,-2.4571845013,-0.9960204582,-5.6649303  
022\H,-2.8866079093,-2.8534761507,-2.4920895753\H,-2.317909223,-2.9254  
790132,-4.164680658\H,-1.5254888999,-1.844273482,-3.0053762116\H,-4.42  
84073742,-2.4322328761,-5.1710768986\H,-5.2109919054,-2.446974157,-3.5  
923926838\H,-5.4468098764,-1.0784995844,-4.7033418528\C,-4.3487706013,  
1.6185211845,-3.0030257726\C,-5.5196471525,1.5824132889,-3.7803854475\  
C,-3.6760089448,2.8516658763,-2.8596424934\C,-6.0231674236,2.715747554

1,-4.4046794141\H,-6.0527302745,0.6486184331,-3.9087823676\C,-4.196225  
7667,3.9836469943,-3.503704065\C,-5.3541284364,3.9267254484,-4.2673605  
788\H,-6.9308744219,2.6481820191,-4.9969631892\H,-3.6730635547,4.92858  
41518,-3.3866559389\H,-5.7308357246,4.8237402659,-4.7500599306\C,-2.43  
418796,3.0917668197,-2.0678769202\C,-1.2188095115,3.3117275009,-2.7294  
969885\C,-2.4890517972,3.2834859916,-0.6807290402\C,-0.0874501351,3.71  
49139398,-2.0225285193\H,-1.173586563,3.1953928804,-3.8096258387\C,-1.  
358396525,3.6934880691,0.0243632486\H,-3.4337905801,3.152941932,-0.160  
2836428\C,-0.1564911066,3.9142279087,-0.6450038915\H,0.8401357387,3.90  
64167204,-2.5557973205\H,-1.4280192147,3.8706810607,1.0945086028\H,0.7  
150327334,4.2665848808,-0.0996976436\C,1.3685125153,-0.1703652361,-0.4  
702853539\C,1.5688671903,-1.0894974266,-1.7125348695\C,1.7924341277,0.  
3300654642,-1.8951914184\H,2.4234085677,-1.7492959913,-1.590607021\H,0  
.6645396228,-1.5485457631,-2.0964622528\H,1.057388642,0.9353314367,-2.  
4154480443\H,2.8123916228,0.7057902444,-1.893143347\Br,1.6260019608,-3  
.1879232607,1.2683217357\\Version=EM64L-G09RevA.01\State=1-A\HF=-4365.  
9113147\RMSD=2.784e-09\RMSF=2.993e-06\Dipole=-0.1077159,0.6401364,-0.8  
084731\Quadrupole=30.7922108,-14.7737845,-16.0184263,-7.2272189,19.098  
7594,-3.4446493\PG=C01 [X(C34H40Au1Br1P1)]\\@

## TS12

1\1\GINC-SHI\_03\FTS\RPBE1PBE\GenECP\C34H40Au1Br1P1(1+)\YIN\22-Jul-2015  
\0\\#p opt=(z-matrix,calcf,ts,noeigen) genecp pbelpbe\\Title Card Req  
uired\\1,1\C,-1.3588221128,0.4936774713,-0.1573124798\H,-1.746219829,-  
0.0239831917,-1.2118215256\C,-1.8703067047,1.3992604312,-1.1051713536\  
C,-3.2297870574,1.8430012699,-0.8315763196\H,-1.3019618554,1.699400501  
7,-1.9827948309\C,-3.667939009,1.0657341551,0.4258578179\C,-3.42980925  
7,2.5297667461,0.511996755\H,-2.5511685697,2.8853317716,1.0439893714\H  
,-4.2919949944,3.1896260858,0.5462660383\Au,0.6076780537,-0.1246043248  
,-0.0111697925\H,-3.9135470545,2.0785358832,-1.640264922\C,-5.03878702  
66,0.4990007573,0.5339344953\C,-5.4850514754,-0.5427103482,-0.29062571  
6\C,-5.9243395074,0.9737355787,1.5075114065\C,-6.7571148185,-1.0869913  
581,-0.160191306\C,-7.1998161332,0.4393976839,1.6531558052\H,-5.595362  
9745,1.777548087,2.1612396369\C,-7.6157956867,-0.5920203194,0.81700913  
83\H,-7.0716772325,-1.8874995715,-0.8212406191\H,-7.8658255898,0.82750  
74727,2.4176555728\H,-8.6103933407,-1.0158967063,0.9181758666\P,2.7760  
080526,-1.0269060683,0.1386645433\C,3.0149655011,-2.1208607853,-1.3915  
393959\C,1.9906891459,-3.2598767231,-1.3397614509\C,2.7011415374,-1.21  
61813719,-2.5928439564\C,4.4183309337,-2.7018102708,-1.5894000312\H,2.  
2336118104,-3.9995492564,-0.5706932479\H,0.9738811371,-2.890291564,-1.  
1614851286\H,1.9926341539,-3.7816107649,-2.3047085422\H,3.3864869394,-  
0.363226019,-2.6519251012\H,2.8157692197,-1.799293344,-3.5151944251\H,  
1.6740898705,-0.8342264918,-2.5599648937\H,4.3977475785,-3.3463936306,  
-2.4769695023\H,5.1614783735,-1.9217089248,-1.7745723991\H,4.754330871

8,-3.3179567502,-0.751257534\C,2.918875298,-1.9519901208,1.7938641036\C,3.1658276195,-0.8805533927,2.8642674802\C,1.570375884,-2.6264240947,2.0897078274\C,4.0157040323,-3.0183440995,1.8706730256\H,4.145677571,-0.4057205153,2.7595677898\H,2.3977149566,-0.0977527043,2.8372753264\H,3.1218476479,-1.3523669306,3.8535356784\H,1.3032281176,-3.384914429,1.3488128605\H,1.634342473,-3.1249170557,3.0650689359\H,0.7548644579,-1.896393419,2.138566987\H,3.9968965414,-3.4594396401,2.8750439391\H,3.8545605247,-3.8335149147,1.1592372672\H,5.0203283593,-2.6142830804,1.7236665479\C,4.1374156152,0.2070537358,0.0826101092\C,5.4599924458,-0.2535385942,0.2023197881\C,3.9236038543,1.5880866113,-0.1194604034\C,6.5492137654,0.602611168,0.1113226937\H,5.6489555446,-1.3077866052,0.3619042949\C,5.037011734,2.4340093798,-0.229094319\C,6.3360772344,1.9571665126,-0.1176684571\H,7.5563421801,0.2091686808,0.2124310571\H,4.863804736,3.4945946751,-0.3888419481\H,7.174779529,2.6421505648,-0.2009714241\C,2.6025448441,2.2795262987,-0.195561596\C,1.9238697748,2.6406847023,0.9769226821\C,2.1228988883,2.7533083106,-1.4226979647\C,0.798352808,3.4604238199,0.9225155747\H,2.310351295,2.3117738388,1.9381310372\C,0.9937775089,3.5682443699,-1.4767368439\H,2.6583572043,2.5054687216,-2.3356388683\C,0.3327600413,3.9302444527,-0.3039483727\H,0.3050727679,3.7555935278,1.8449997279\H,0.6528485042,3.950409116,-2.4357637458\H,-0.5246983151,4.5969546538,-0.344617706\C,-2.4548995073,0.2301456929,0.8275527926\C,-2.5736361136,-1.1215207266,1.4867264917\C,-2.1109557983,0.0395854832,2.2925057817\H,-3.5800782642,-1.4931062963,1.6558633043\H,-1.8500978794,-1.8760428445,1.1910867434\H,-1.0629049913,0.1047987882,2.5720962652\H,-2.804666792,0.4782604309,3.0054045651\Br,-4.3635810476,-1.2507621821,-1.6469980029\\Version=EM64L-G09RevA.01\State=1-A\HF=-4365.8869495\RMSD=7.606e-09\RMSF=4.654e-06\Dipole=0.0671803,0.5620538,0.3077794\Quadrupole=40.9004861,-16.0953509,-24.8051352,-9.6570264,-6.0901788,-1.3442141\PG=C01 [X(C34H40Au1Br1P1)]\\@

#### IN14

1\1\GINC-SHI\_02\FOpt\RPBE1PBE\GenECP\C34H40Au1Br1P1(1+)\YIN\16-Jul-2015\0\#p opt genecp pbelpbe\\Title Card Required\\1,1\C,-0.0225334521,-0.0051689971,0.0488470403\C,0.0156447381,0.0252820658,1.4299820802\C,1.4277107218,0.0213812697,1.9114809307\H,-0.8154589572,-0.2503762112,2.0766959671\C,2.3071865851,-0.0960960395,0.6672880927\C,2.3394059557,1.1503815707,1.4994035658\H,1.8924365301,2.0609389287,1.1023094866\H,3.2186273554,1.3093937854,2.1182502173\Au,-0.7910739393,2.0783957356,0.8021763821\H,1.6592960168,-0.5240814999,2.8207537182\C,3.5097378725,-0.9744867951,0.6115890139\C,3.4348737453,-2.3705094365,0.7140272811\C,4.7768320721,-0.4115892785,0.4210915516\C,4.5704400248,-3.1702453179,0.6393119756\C,5.9212813413,-1.1968828056,0.3396460997\H,4.8541859571,0.6697847457,0.3383761436\C,5.8162862469,-2.5798885061,0.4510246246\H,4.4753169707,-4.2470051118,0.7304537889\H,6.8905222657,-0.7305480757,0.191

1056464\H,6.7015134629,-3.2063258975,0.3938286617\P,-1.7020712203,4.16  
 89205134,0.2463621188\C,-2.9909340189,3.8626767887,-1.1100148502\C,-2.  
 2793433625,3.3339728994,-2.359691599\C,-3.9214251562,2.7743602978,-0.5  
 545673127\C,-3.8485940125,5.076112928,-1.4824518121\H,-1.7024574704,4.  
 1128126693,-2.8681555312\H,-1.6096895735,2.4969204029,-2.1282163069\H,  
 -3.0335124731,2.9723518956,-3.0691908063\H,-4.4104971722,3.090821388,0  
 .3732921711\H,-4.7072198395,2.5710120424,-1.2924395418\H,-3.3895460008  
 ,1.8356427748,-0.361869367\H,-4.5113484943,4.7837754899,-2.3062249776\  
 H,-4.4853608461,5.3964977118,-0.6537617383\H,-3.2617217102,5.930973087  
 9,-1.8278372998\C,-0.2813923449,5.3292153309,-0.2487302621\C,0.3948882  
 911,5.7551240993,1.0609420027\C,0.7318165311,4.5344995736,-1.085396007  
 8\C,-0.6892993325,6.5734214314,-1.0441026131\H,-0.2584266636,6.3723905  
 177,1.6848213543\H,0.7190727181,4.8886882381,1.6501401449\H,1.28907952  
 15,6.3435300956,0.8221497582\H,0.3189428145,4.1941432081,-2.0385364066  
 \H,1.5855326907,5.1859588627,-1.309653666\H,1.1102396838,3.6585610457,  
 -0.5477093609\H,0.2155235414,7.1575786331,-1.2529297114\H,-1.138526873  
 3,6.3244151117,-2.0098283453\H,-1.3675417913,7.2317664283,-0.496085737  
 9\C,-2.6188911584,4.9479791887,1.6318442196\C,-3.1782469535,6.22124361  
 86,1.4266055538\C,-2.8481630847,4.3019229516,2.8668703667\C,-3.9587774  
 32,6.8449215843,2.3907361736\H,-3.014652519,6.7365802773,0.4883878662\  
 C,-3.6608664694,4.9380644146,3.8169959849\C,-4.2132154859,6.1913534871  
 ,3.591157141\H,-4.3707738293,7.8309406836,2.197946692\H,-3.8359978949,  
 4.4345653761,4.763536868\H,-4.8300104354,6.6575848218,4.3538187822\C,-  
 2.2690440542,3.0014577867,3.3130579384\C,-0.9291438108,2.9249129566,3.  
 7287935185\C,-3.1039005009,1.8977298247,3.5326384906\C,-0.4487675967,1  
 .7836588019,4.3700000115\H,-0.2851378142,3.7924325473,3.6089515093\C,-  
 2.6180723235,0.7535877562,4.1626890931\H,-4.1480074052,1.951991433,3.2  
 351052346\C,-1.2938809625,0.6989793128,4.5952755485\H,0.5811743249,1.7  
 556744709,4.714366511\H,-3.2850161687,-0.085331679,4.3415882821\H,-0.9  
 26772196,-0.179920998,5.1181098809\C,1.3428310501,-0.0690334548,-0.518  
 7045646\C,1.5666668566,-0.8965864031,-1.7679378007\C,1.7066820128,0.58  
 21594131,-1.8373812498\H,2.4680518749,-1.5016315731,-1.7898218701\H,0.  
 6966743489,-1.3656455203,-2.2187255221\H,0.9401184346,1.1597608571,-2.  
 3474600936\H,2.7092262838,0.9974095592,-1.9037395602\H,-0.9058246654,-  
 0.2272545062,-0.5470112097\Br,1.7679425488,-3.2327902658,0.9662654816\  
 \Version=EM64L-G09RevA.01\State=1-A\HF=-4365.9342053\RMSE=7.184e-09\RM  
 SF=3.854e-06\Dipole=-0.6759993,1.9216635,-0.3137583\Quadrupole=9.59391  
 86,5.8134667,-15.4073853,-24.3683526,-5.1249904,-2.5179402\PG=C01 [X(C  
 34H40Au1Br1P1)]\@

# IN15

1\1\GINC-SHI\_02\FOpt\RPBE1PBE\GenECP\C41H49Au1Br1N2(1+)\YIN\26-Jan-201  
 6\0\#p genecp pbelpbe opt\\Title Card Required\\1,1\C,-0.7015080595,-  
 0.2638775194,0.2374619266\C,-0.4842651122,-0.0328496722,1.5898893523\C

,0.8091234559,-0.1113970855,2.1318407367\C,1.8811243518,-0.41833148,1.2789544628\C,1.664569716,-0.6477679391,-0.0722805259\C,0.3738707485,-0.5703645816,-0.5913838415\H,-1.7091001554,-0.2074070918,-0.1600140303\H,2.8817395121,-0.4785157481,1.6959229744\H,2.5018374604,-0.8903297805,-0.7190095492\H,0.197534364,-0.7516817014,-1.6473897679\C,1.0582332093,0.0913545579,3.5323852232\C,1.3933363713,-0.0478896217,4.7197187143\C,1.7750133355,-0.4764304478,6.0428072267\C,3.0058735924,-1.3660729587,6.1137457732\C,3.0893803139,0.0383182635,6.6033560029\H,3.5056410292,-1.6207544035,5.1845758882\H,2.9488438833,-2.1762734944,6.8356580415\H,3.1081260103,0.2168591594,7.6748333033\H,3.6426605003,0.7639541624,6.0137728107\C,0.6210352054,-0.7528525789,7.0052922742\H,0.0359661122,0.1715985924,7.1200737529\H,1.0508987044,-0.9804197542,7.9880667407\C,-0.2643388237,-1.878224146,6.5618469765\H,-0.7699233212,-1.7460568821,5.6043191233\C,-0.4579631661,-2.9967336259,7.2570125658\H,0.021709805,-3.1632767594,8.219836963\H,-1.1113037201,-3.7859884674,6.8965455311\Au,0.8002315155,2.1258361135,4.3914046555\Br,-1.9471262141,0.3854701354,2.6970800503\C,0.9283940646,6.2297667927,5.305513498\C,-0.3272552352,6.1713028307,4.7940699504\H,1.5020136749,7.0539182042,5.7003816728\H,-1.0756216106,6.9347319124,4.6478474029\N,1.437426752,4.949544452,5.2509515855\N,-0.5528427097,4.857162315,4.4412056342\C,0.5302329855,4.0979109221,4.7194542679\C,2.7466029479,4.5699552121,5.711884927\C,2.9163420199,4.3021910092,7.0800996101\C,3.7931981475,4.5025180199,4.7776471388\C,4.1966442529,3.938592114,7.5035503529\C,5.0504349223,4.1279366001,5.2580190631\C,5.2517849909,3.8478316787,6.6039639201\H,4.3701210421,3.7296393479,8.5556347626\H,5.8872463061,4.0675717045,4.5675659386\H,6.2406519286,3.5675279018,6.9560973258\C,-1.7742600089,4.384765176,3.8429272606\C,-2.7769680874,3.8730413104,4.6818313053\C,-1.9158801824,4.4942269978,2.4501940495\C,-3.9627479491,3.4553902228,4.0729934949\C,-3.1244917935,4.065871153,1.8982344629\C,-4.1376728699,3.5530903213,2.6982173667\H,-4.764281335,3.0559584154,4.6884435115\H,-3.2739836529,4.1372037546,0.8245189191\H,-5.0717091293,3.2294283457,2.2475827457\C,3.6142575958,4.8386281572,3.3087720944\C,3.9462582671,3.6421033033,2.4125202217\C,4.446749755,6.0657367305,2.9210344659\H,2.5613651134,5.0910545796,3.1378603021\H,3.3255100797,2.7740628417,2.663927619\H,3.7693547063,3.8957712887,1.3612978696\H,4.9972220752,3.3469079216,2.5099189915\H,4.1943127071,6.9340866954,3.5388494822\H,5.519532481,5.8752724568,3.0372519322\H,4.2682155166,6.3297948256,1.8729477916\C,1.7878937647,4.4116006311,8.0893484061\C,2.0479641516,5.5516569882,9.0801558593\C,1.5545815233,3.0882738706,8.8232969698\H,0.8631425237,4.6483295182,7.5505518752\H,2.1807492363,6.5102108303,8.5668397259\H,1.2076978575,5.6520915202,9.7757681528\H,2.9507810303,5.3655225715,9.6725653267\H,1.3401386934,2.2771695232,8.118836036\H,2.4275771132,2.7980435379,9.4189709359\H,0.7051496691,3.180557686,9.5090876834\C,-0.8285608162,5.0522047175,1.5500223738\C,-1.2944317076,6.3278862164,0.8407208794\C,-0.3483271939,4.003

7354814,0.5416292939\H,0.0327024883,5.3202735021,2.1730895536\H,-1.610  
6494851,7.0944532032,1.5564406012\H,-0.4832850428,6.7434754668,0.23295  
35259\H,-2.1401386164,6.1283255273,0.1733317796\H,0.022592621,3.104431  
2645,1.0457264997\H,-1.1549966972,3.699745984,-0.1348991753\H,0.462193  
1179,4.4124987368,-0.0722623343\C,-2.6228605345,3.7708262656,6.1877941  
381\C,-2.7076677864,2.3145140322,6.6552757333\C,-3.6512364083,4.645161  
0878,6.9125163369\H,-1.6272939235,4.141423572,6.4589032384\H,-1.960112  
2434,1.6924432923,6.1496316946\H,-2.5373305824,2.2509579736,7.73599593  
11\H,-3.6943533463,1.8839951493,6.4506182807\H,-3.5747677361,5.6938659  
659,6.6059045295\H,-4.674510486,4.3121094674,6.7069881853\H,-3.4978281  
338,4.5948683806,7.9961098267\\Version=EM64L-G09RevA.01\State=1-A\HF=-  
4405.9155984\RMSD=5.434e-09\RMSF=2.237e-06\Dipole=0.9040871,0.5965251,  
-0.043093\Quadrupole=-2.9374274,-2.5263442,5.4637716,-4.6209771,7.3139  
379,5.541583\PG=C01 [X(C41H49Au1Br1N2)]\\@

### TS13

1\1\GINC-SHI\_03\FTS\RPBE1PBE\GenECP\C41H49Au1Br1N2(1+)\YIN\28-Jan-2016  
\\#p genecp pbelpbe opt=(calcf,ts,noeigen)\\Title Card Required\\1,  
1\C,0.6904626439,-3.5183664402,-1.7504625764\C,-0.7414044295,-3.047127  
5813,-1.8026937264\C,0.1450160025,-3.0120662379,-3.0410269227\H,1.4063  
412158,-2.9056424324,-1.2099737758\H,0.8387602324,-4.5901343224,-1.643  
9756973\H,-0.0809864745,-3.7262015127,-3.8283345947\H,0.4709894099,-2.  
0378288558,-3.3933949514\C,-1.1426470855,-1.7480903031,-1.2201421781\C  
,-2.355681687,-1.3085594904,-1.1457750018\C,-3.3689600578,-0.417494238  
8,-0.6681737573\C,-3.7236946845,0.7131533104,-1.4278434318\C,-4.037629  
0987,-0.6387466552,0.5530953653\C,-4.6958849855,1.5947213034,-0.983326  
8621\C,-5.0234833204,0.2360203226,0.9931301514\C,-5.3493571452,1.34969  
82364,0.2243891096\H,-5.5304947901,0.0442979352,1.9325804137\H,-6.1232  
335277,2.0271902078,0.5737094278\C,-1.8321195587,-4.1082224914,-1.6559  
889865\H,-1.7314680275,-4.6004155948,-0.6822336455\H,-1.6891156626,-4.  
8866440574,-2.4191058383\C,-3.197652615,-3.5216671447,-1.7738740505\C,  
-3.4959475589,-2.5406959166,-2.6594114284\H,-3.961624478,-3.8532647687  
,-1.0740719713\H,-4.4924817243,-2.1119298192,-2.7046789858\H,-2.799070  
5086,-2.2511150442,-3.4418660393\Au,0.1759070498,-0.3509098064,-0.4177  
520658\H,-3.2089507542,0.8846735604,-2.3683559144\H,-4.9500976221,2.46  
6797422,-1.5773293384\Br,-3.6122702579,-2.1256626102,1.6208477743\C,3.  
4322190411,1.732604621,1.2938766981\C,2.6119768507,2.7869795506,1.0595  
79272\H,4.4177628158,1.6761857728,1.7295002258\H,2.7326924462,3.842382  
8053,1.2487230079\C,1.5520959326,0.9326371766,0.3472766947\N,1.4674848  
435,2.2770265561,0.4793709647\N,2.7664203271,0.6080819082,0.8496741577  
\C,3.2967772611,-0.7280057936,0.896437221\C,4.0850463954,-1.1685093013  
,-0.1794957383\C,3.0077179222,-1.5253199586,2.0154489449\C,4.575033968  
6,-2.4749646373,-0.1175429996\C,3.5265289754,-2.8221312574,2.024459785  
5\C,4.2978384651,-3.2945595798,0.9700043205\H,5.1876830294,-2.85299157

89,-0.9313920511\H,3.3259789717,-3.4690803883,2.874032204\H,4.69371414  
 17,-4.3059239534,0.9998920381\C,0.3400106072,3.073449435,0.0762132378\  
 C,-0.6670567202,3.3282339626,1.0203660191\C,0.30762847,3.5710549722,-1  
 .236475851\C,-1.7494080619,4.1060575142,0.6034779215\C,-0.7984223344,4  
 .3435201079,-1.5979386429\C,-1.8163595738,4.608200277,-0.6900829451\H,  
 -2.5476538446,4.3257920783,1.3070603571\H,-0.8579194391,4.7495841497,-  
 2.6041234424\H,-2.662659407,5.220328073,-0.9902083391\C,-0.6174653032,  
 2.7956527847,2.4403232629\C,-1.7438877511,1.7882784378,2.6900105188\C,  
 -0.6517212015,3.9317319825,3.4674186719\H,0.3308530676,2.2627998528,2.  
 5748445298\H,-1.6904363522,0.9509755019,1.985224397\H,-1.6756026751,1.  
 3850341623,3.7067761545\H,-2.7286857898,2.2572382062,2.5816468799\H,0.  
 1650344312,4.6437795875,3.3075957715\H,-1.5935310549,4.4898700487,3.42  
 02614492\H,-0.557984612,3.5284854925,4.4816463872\C,1.4064133688,3.298  
 0654836,-2.2466704977\C,2.0282484489,4.5971187091,-2.7684353332\C,0.89  
 08202356,2.4295189625,-3.3984301972\H,2.2012316241,2.7349270803,-1.744  
 4129527\H,2.413949783,5.2149423567,-1.9505344604\H,2.8588279887,4.3737  
 047274,-3.4468511415\H,1.3007592501,5.1978978149,-3.325514639\H,0.4881  
 407989,1.4802641692,-3.0260562644\H,0.0972190026,2.9395424281,-3.95677  
 99348\H,1.7018982161,2.2070049809,-4.1011689565\C,4.407942314,-0.29215  
 08105,-1.375788465\C,3.7442968079,-0.8294780259,-2.6475427087\C,5.9197  
 731747,-0.1342476318,-1.5651648566\H,3.9960694978,0.7066839684,-1.1912  
 795513\H,2.6556689586,-0.8817638787,-2.5309158325\H,3.9665930779,-0.17  
 67118047,-3.4993773969\H,4.1065756507,-1.8343930786,-2.8929707875\H,6.  
 3986183264,0.2621359319,-0.6634867273\H,6.3984218844,-1.0904665054,-1.  
 803504204\H,6.1280691997,0.5533391809,-2.3920811656\C,2.1782169204,-1.  
 0329661731,3.1863395747\C,2.9963627285,-1.0290072072,4.4819229098\C,0.  
 8958658755,-1.8557693458,3.3445056658\H,1.8787015458,0.0019402397,2.98  
 44303462\H,3.9016045537,-0.4200795303,4.3845267769\H,2.4002084348,-0.6  
 231803298,5.3066037836\H,3.305228193,-2.0417961731,4.7638999659\H,0.29  
 54051051,-1.8340039097,2.4279740796\H,1.1195635509,-2.9029764291,3.578  
 4047101\H,0.2865281409,-1.4559457433,4.1629586746\\Version=EM64L-G09Re  
 vA.01\State=1-A\HF=-4405.8976222\RMSD=3.789e-09\RMSF=2.644e-06\Dipole=  
 -0.6921651,0.1382201,-0.7303884\Quadrupole=14.0526841,1.9460516,-15.99  
 87357,-2.6427444,6.4897737,5.0709238\PG=C01 [X(C41H49Au1Br1N2)]\@

# IN16

1\1\GINC-A718\FOpt\RPBE1PBE\GenECP\C41H49Au1Br1N2(1+)\ROOT\27-Jan-2016  
 \0\#p genecp pbelpbe opt\au\_ph\_br\_int2\_up\_jp\1,1\C,-0.3045569088,-0  
 .0667155524,-0.0358147506\C,-0.0733331664,-0.1063110655,1.4841620684\C  
 ,1.0743665755,-0.1726435103,0.4389054844\H,-0.7827881963,-0.9393271716  
 ,-0.4712074373\H,-0.6615804533,0.8955325036,-0.3931979786\H,1.70594106  
 92,0.7112986653,0.434992318\H,1.5958239536,-1.1206480502,0.3522565187\  
 C,-0.370909294,-1.3143534875,2.2135519448\C,-0.5630546838,-0.974247557  
 6,3.612903373\C,-1.428976392,-1.7817615179,4.5143590167\C,-0.919445281

1,-2.4863714484,5.6088406177\C,-2.8145601776,-1.8281597801,4.305109353  
6\C,-1.7548440198,-3.181418845,6.4769778781\C,-3.6634177412,-2.5161856  
126,5.1637196252\C,-3.1288591546,-3.1889435528,6.2589064539\H,-4.73236  
95541,-2.5169778691,4.9791529679\H,-3.7920140931,-3.7179389869,6.93698  
21377\C,-0.3245559857,1.1305882157,2.3427051934\H,-1.2684796987,1.6067  
988513,2.0548199787\H,0.471455248,1.8790874287,2.2560977724\C,-0.42311  
01102,0.5675001106,3.7396455813\C,0.6968092141,-0.2754087204,4.1823024  
992\H,-1.0314657805,1.0653178908,4.488620675\H,0.8270760761,-0.4320570  
528,5.2489266388\H,1.6117825564,-0.3206724938,3.597514735\Au,-0.429108  
9898,-3.1776475062,1.4442857096\H,0.1537080252,-2.4907006507,5.7785136  
71\H,-1.3313047098,-3.7120117616,7.3243129059\Br,-3.5799264808,-0.9192  
696566,2.8302014463\C,-0.6111551789,-6.741169175,-0.8674707822\C,-0.00  
17077989,-7.2367912013,0.2387023784\H,-0.902629832,-7.2119716256,-1.79  
35066095\H,0.3524256345,-8.2280012489,0.4761387497\C,-0.3991171944,-5.  
0503147052,0.6055826069\N,0.117124455,-6.1881326841,1.126919969\N,-0.8  
422133676,-5.4031749977,-0.6251033403\C,0.696938293,-6.3004115213,2.43  
84566774\C,-0.1248352795,-6.7365147315,3.4900183344\C,2.0564594303,-5.  
9898865076,2.6016554707\C,0.4598530827,-6.8393188455,4.7540321861\C,2.  
5867014542,-6.1089054694,3.8881828996\C,1.7986189059,-6.5263936472,4.9  
535540464\H,-0.1432272645,-7.1745404755,5.5935250283\H,3.635770434,-5.  
8800622102,4.0549085383\H,2.2343513732,-6.619216177,5.9445950099\C,-1.  
4800449726,-4.5097492787,-1.5553577129\C,-0.6833397966,-3.8699158698,-  
2.5200018927\C,-2.8714792783,-4.3408074399,-1.4713294464\C,-1.33002550  
54,-3.013758958,-3.4138682749\C,-3.4634495651,-3.4698067648,-2.3893322  
505\C,-2.7035265402,-2.8109849361,-3.3473040313\H,-0.7507866667,-2.505  
652164,-4.1796906501\H,-4.5382245766,-3.313992961,-2.3576002203\H,-3.1  
864217076,-2.1435818429,-4.0557355033\C,2.9475046028,-5.556496707,1.45  
2528588\C,4.0938599311,-6.5492957933,1.2338406078\C,3.4815798556,-4.13  
67409303,1.666286702\H,2.3456378736,-5.5438980651,0.536625119\H,3.7184  
534621,-7.5629327994,1.0578575766\H,4.6938086832,-6.2530406057,0.36627  
86111\H,4.7622669226,-6.5875345645,2.1011944466\H,2.6589338185,-3.4214  
487065,1.7867419965\H,4.114103183,-4.0775992753,2.5594644952\H,4.08836  
03044,-3.8249336291,0.8083754689\C,-1.5866128985,-7.095377793,3.297882  
5336\C,-2.4979225326,-6.1655930532,4.1031143736\C,-1.8485907225,-8.564  
5544849,3.6450604477\H,-1.8386557006,-6.9596964818,2.2399545538\H,-2.3  
359553234,-5.1158258161,3.8365797453\H,-3.5495174048,-6.4106808107,3.9  
150113384\H,-2.3209313884,-6.2670082757,5.1797518603\H,-1.2184345808,-  
9.2375613415,3.0535640119\H,-1.6499687674,-8.7679278671,4.7032552843\H  
, -2.8959003926,-8.8199804484,3.4499442793\C,0.8089172571,-4.1174234931  
, -2.6423928823\C,1.6125833746,-2.8166521352,-2.6998983808\C,1.11018474  
23,-4.9966033831,-3.861955703\H,1.1390221937,-4.6619855855,-1.75007708  
84\H,1.3948429567,-2.1755539636,-1.8392242633\H,2.6857103609,-3.037320  
7129,-2.701352214\H,1.3977727379,-2.2433545303,-3.6084907129\H,0.58085  
17317,-5.9541907291,-3.8109555318\H,0.8058093999,-4.4990758625,-4.7898

302354\H,2.1836594648,-5.2053993328,-3.9289811193\C,-3.7331988722,-5.0851952211,-0.4687362526\C,-4.6488746792,-6.0866857575,-1.1820377888\C,-4.5425202637,-4.1291208215,0.4110305667\H,-3.0742616496,-5.657223581,0.1943102044\H,-4.075379451,-6.8010604457,-1.7827703429\H,-5.2376588755,-6.6518406879,-0.4511404101\H,-5.3500313681,-5.5765507326,-1.8520354206\H,-3.8943039798,-3.4243423219,0.9425718721\H,-5.2603443716,-3.5480637986,-0.1790856574\H,-5.1134439555,-4.6960189531,1.1550604682\\Version=ES64L-G09RevD.01\State=1-A\HF=-4405.9479342\RMSE=3.599e-09\RMSF=1.758e-06\Dipole=0.9500041,0.317187,0.0662478\Quadrupole=-12.7032081,4.9073496,7.7958586,3.1911455,1.0876646,0.4248987\PG=C01 [X(C41H49Au1Br1N2)]\@

#### TS14

1\1\GINC-A765\FTS\RPBE1PBE\GenECP\C41H49Au1Br1N2(1+)\ROOT\01-Feb-2016\0\#p opt=(calcf,ts,noeigen) genecp pbelpbe\\Title Card Required\\1,1\C,0.0979834626,-2.7791669977,-2.4783111331\C,0.2691058693,-3.8100040745,-1.3420911257\H,-0.3051789134,-3.2050350407,-3.3953652599\H,0.9468462864,-2.1277394308,-2.6653427458\H,1.0274452181,-3.5009104803,-0.623115964\H,0.3380018832,-4.8659758067,-1.6008912088\C,-1.0839125456,-3.2696091864,-1.1427821941\C,-2.4120463551,-3.9385142552,-1.2807568236\C,-3.2989430096,-2.8660765014,-1.8760462487\H,-2.7263790989,-4.2291510391,-0.2657736459\H,-2.3561493713,-4.8673091899,-1.8631378778\C,-2.4594129722,-1.5942549955,-2.0573614335\C,-2.9610439954,-2.3800046998,-3.2458975156\H,-2.2652923545,-2.9443533293,-3.8618816047\H,-3.7699725644,-1.9252589811,-3.8102888377\C,-1.059657919,-1.919985749,-1.5554319688\Au,0.0714197285,-0.5131729285,-0.4635734658\H,-4.3257027038,-2.7883334159,-1.5342630824\C,-3.0372453332,-0.241471739,-1.8053369137\C,-3.4602012515,0.1738478265,-0.5368949928\C,-3.187173866,0.6677946854,-2.8576439114\C,-4.009701884,1.4318975402,-0.319119179\C,-3.7357900048,1.9300112889,-2.660530262\H,-2.8680850027,0.3647520695,-3.8517077394\C,-4.148115137,2.3115872068,-1.3878933074\H,-4.3297834345,1.7152675985,0.6776400376\H,-3.8460610557,2.6098664697,-3.5001546248\H,-4.584895364,3.291370833,-1.2200168515\Br,-3.3221335639,-0.9931415583,0.9543342552\C,3.1739052361,1.2750276388,1.742654809\C,2.3534636418,2.3526406135,1.7090653829\H,4.1509491288,1.1328000319,2.177883478\H,2.4669647749,3.3493895574,2.1056553136\C,1.3107215699,0.6839237831,0.6137585344\N,2.5198040219,0.2654822384,1.0659506788\N,1.2180597248,1.9720703382,1.0190500973\C,3.0521523034,-1.0513808379,0.8465084037\C,2.7340326959,-2.0659979867,1.7639963\C,3.8709020669,-1.2603779143,-0.2763004865\C,3.2447386638,-3.3415651601,1.5075058768\C,4.3505013884,-2.555642643,-0.4850743807\C,4.0392661882,-3.586928069,0.3937096442\H,3.0252702622,-4.1507503182,2.1987679151\H,4.9866919788,-2.7565974021,-1.3426188126\H,4.4322823466,-4.5846696785,0.2179507513\C,0.1155003858,2.8654578469,0.7813421542\C,-0.7836984301,3.1044014598,1.8346421793\C,0.0299974727,3.5108555973,-0.4627

615817\C,-1.8012498497,4.0327202607,1.6051733728\C,-1.0159226181,4.419  
5735198,-0.6384060352\C,-1.9180505022,4.683245608,0.3835297827\H,-2.50  
74749286,4.2549822755,2.4001812872\H,-1.1135890423,4.9398166666,-1.587  
2553112\H,-2.7127206767,5.4085034815,0.230459898\C,4.2315766185,-0.149  
4440588,-1.2459640257\C,3.5239570244,-0.3408530521,-2.591339843\C,5.74  
66770656,-0.0263319132,-1.432516757\H,3.8786812975,0.7994960137,-0.826  
2063243\H,2.434697355,-0.3401359057,-2.4619504451\H,3.7826651216,0.471  
459034,-3.2798957211\H,3.8181732928,-1.285375703,-3.0644702477\H,6.259  
3177464,0.1117556394,-0.4748159317\H,6.1716045605,-0.9139645231,-1.914  
0374292\H,5.9786097602,0.8338713871,-2.0696428579\C,1.889873464,-1.823  
5148871,3.0013861174\C,2.6953420419,-2.0889900869,4.2777321879\C,0.604  
6945511,-2.6565610381,2.9758633489\H,1.5923428408,-0.7690906422,3.0125  
573295\H,3.6030929141,-1.4773417135,4.3152504863\H,2.0919542529,-1.857  
0050084,5.1620630402\H,2.99834791,-3.1395146299,4.3495072035\H,-0.0013  
644955,-2.4182552356,2.0939614413\H,0.8230703126,-3.730917376,2.964960  
1996\H,0.0021628229,-2.4506414586,3.8675125194\C,1.0244654672,3.282659  
9241,-1.5860420641\C,1.7624660548,4.5758443031,-1.9468014684\C,0.34357  
33151,2.6719165436,-2.8143668484\H,1.7755711322,2.5629402899,-1.241691  
929\H,2.275615122,5.0014017249,-1.0777904554\H,2.5108304525,4.38165525  
01,-2.7232444366\H,1.0752272367,5.3365914602,-2.3333874652\H,-0.155301  
9622,1.7294996355,-2.5604071101\H,-0.4114923076,3.3481751989,-3.231278  
9474\H,1.0834132011,2.474412559,-3.5987761678\C,-0.6608568895,2.436324  
9664,3.1924973723\C,-1.9704511626,1.7779488872,3.634263952\C,-0.177058  
5131,3.4386432031,4.2474431959\H,0.0898438888,1.6407343176,3.117581006  
5\H,-2.325898776,1.0541088378,2.8941505657\H,-1.8217487574,1.251322585  
6,4.5836372788\H,-2.7621961209,2.51815962,3.7961314752\H,0.7829711972,  
3.8898329696,3.9734348555\H,-0.899584959,4.2528151656,4.3748027503\H,-  
0.0547676274,2.9446916887,5.2177125231\\Version=ES64L-G09RevD.01\State  
=1-A\HF=-4405.9200479\RMSD=3.460e-09\RMSF=2.690e-06\Dipole=0.746898,-1  
.1716117,-0.8021019\Quadrupole=-3.5790915,12.9345228,-9.3554313,-4.434  
3006,7.9425091,9.3628909\PG=C01 [X(C41H49Au1Br1N2)]\\@

# IN17

1\1\GINC-SHI\_03\FOpt\RPBE1PBE\GenECP\C41H49Au1Br1N2(1+)\YIN\26-Jan-201  
6\0\\#p opt genecp pbelpbe\\Title Card Required\\1,1\C,-0.3501938314,0  
.2683832733,-0.6418282848\C,0.0741422256,0.5122542044,0.8420986401\H,0  
.4853768144,0.3511361173,-1.3453474121\H,-1.1968818307,0.8392119605,-1  
.0299648185\H,-0.4459839484,1.2810115586,1.4182080106\H,1.1548035582,0  
.6772687118,0.9300283471\C,-0.2791702858,-0.9587519181,1.0979836759\C,  
0.2574306667,-2.1978669855,1.7889797958\C,0.3423967909,-3.1845893272,0  
.620147834\H,-0.3803081509,-2.5535109727,2.605853985\H,1.2479408839,-2  
.0010863069,2.21853228\C,-0.2430901465,-2.5615713412,-0.6648590033\C,1  
.2499426855,-2.7915630262,-0.4985547902\H,1.9090305069,-1.9340868435,-  
0.3695528154\H,1.6684640901,-3.5900149646,-1.1048210824\C,-0.602762766

4,-1.1857973993,-0.2275121137\Au,-2.5233347094,-1.0195107164,1.0472420  
594\H,0.1868038585,-4.2413347793,0.8111159894\C,-0.9501856111,-3.30305  
09986,-1.750659984\C,-2.0912688708,-4.0876003452,-1.5611581875\C,-0.44  
80640635,-3.220367942,-3.0560640194\C,-2.6974917107,-4.7759968646,-2.6  
08248579\C,-1.0481025388,-3.8848070832,-4.1183690239\H,0.4447023712,-2  
.6237474561,-3.2261032556\C,-2.1741844576,-4.6710668536,-3.8919651917\  
H,-3.5703219563,-5.3900442176,-2.4135463707\H,-0.6306096667,-3.7986856  
248,-5.1169522829\H,-2.645341693,-5.2098059638,-4.7086820903\Br,-2.868  
0357663,-4.2739420516,0.1599694176\C,-6.1728627,-0.6458854412,3.155833  
9986\C,-6.5389256746,-0.0753953219,1.9817009965\H,-6.7097065217,-0.777  
5314337,4.0820129762\H,-7.4631640662,0.3846397784,1.6689921294\C,-4.40  
98322533,-0.7618658183,1.7672917041\N,-5.4463144494,-0.1565657265,1.14  
32990176\N,-4.8673647734,-1.067951338,3.0045072573\C,-5.4062475402,0.3  
99447382,-0.1846102123\C,-4.9951671522,1.7344234801,-0.329274516\C,-5.  
8137938239,-0.4034418753,-1.2639112027\C,-4.9808453693,2.2599256099,-1  
.6234397556\C,-5.781286484,0.1769834782,-2.5333591404\C,-5.3666641119,  
1.4912438353,-2.7133803226\H,-4.6728810852,3.290514415,-1.7768417961\H  
, -6.0885274566,-0.4072812727,-3.3950899686\H,-5.3531906579,1.921367895  
7,-3.7109467499\C,-4.0835262494,-1.6472090464,4.0660348987\C,-4.141341  
5558,-3.0373930262,4.2718117572\C,-3.3287138618,-0.7818380965,4.875025  
6927\C,-3.3865292649,-3.5543210472,5.3265806752\C,-2.5923054595,-1.357  
2463823,5.9137218745\C,-2.6180833897,-2.7267350151,6.1370807199\H,-3.4  
017059975,-4.6221950093,5.5197523271\H,-1.9996258518,-0.7186237581,6.5  
627447932\H,-2.0426772592,-3.1536291369,6.9537628716\C,-6.323150645,-1  
.8200981031,-1.0721329218\C,-5.8421838336,-2.7780989075,-2.1628153939\  
C,-7.8554007969,-1.8314312576,-0.9914423832\H,-5.9309564188,-2.1946926  
312,-0.1185914654\H,-4.7553086975,-2.7411042183,-2.284606765\H,-6.1214  
503843,-3.8042934059,-1.9001109267\H,-6.3028079109,-2.5579470104,-3.13  
24007585\H,-8.2292826821,-1.2065416807,-0.1733991372\H,-8.2947045997,-  
1.4571700548,-1.9231975542\H,-8.2223856651,-2.8512662003,-0.830993022\  
C,-4.6128544045,2.6161939486,0.8456983065\C,-5.6453939926,3.7311750508  
,1.0466050462\C,-3.2045860358,3.1951195449,0.6887982516\H,-4.610674269  
4,2.0020897216,1.7533816705\H,-6.6506615482,3.3253284762,1.2031658398\  
H,-5.3852487033,4.3410717513,1.9187421829\H,-5.6872501004,4.3943753405  
,0.1753894957\H,-2.4623810552,2.3992098662,0.5618236999\H,-3.134318062  
,3.8624122806,-0.1773118589\H,-2.9334177289,3.7789449183,1.5756265485\  
C,-3.317373884,0.7247459276,4.6924400726\C,-1.8980313047,1.264558574,4  
.4979282963\C,-4.0127098706,1.4191308018,5.8689450448\H,-3.8827643059,  
0.9682950343,3.785757489\H,-1.4022655589,0.7763819098,3.6514832571\H,-  
1.9265061711,2.3430753001,4.3056943074\H,-1.2782407215,1.1066322062,5.  
3874661349\H,-5.0430979671,1.0684139824,5.9917814088\H,-3.4832924366,1  
.2307202153,6.8096662398\H,-4.0385443489,2.503072562,5.711613492\C,-5.  
0154277697,-3.9494020997,3.4293451258\C,-6.4017187057,-4.1147093163,4.  
0672906826\C,-4.3904174737,-5.3270953759,3.1968903612\H,-5.1493688812,

-3.4752835957,2.4482064185\H,-6.9253371018,-3.1598244978,4.1757008805\  
H,-7.027648206,-4.772251312,3.4539234281\H,-6.3147296262,-4.5635597331  
,5.0632269179\H,-3.3507829551,-5.2578554653,2.8596258094\H,-4.40605003  
78,-5.9380279534,4.1063080671\H,-4.9609826376,-5.8717972579,2.43742416  
04\\Version=EM64L-G09RevA.01\State=1-A\HF=-4405.9464796\RMSD=6.140e-09  
\RMSF=3.041e-06\Dipole=0.2796885,0.6846534,-0.0269011\Quadrupole=1.203  
2418,-9.5821594,8.3789176,-2.4026823,-5.4130333,2.8324541\PG=C01 [X(C4  
1H49Au1Br1N2)]\@

## TS15

1,1\C,0.4667355314,-4.1217556151,2.002685532\C,-1.0583566807,-4.471813  
8531,1.8841966922\H,1.1361047318,-4.9877360457,1.9491228752\H,0.728667  
387,-3.5214680477,2.8807560078\H,-1.6899816261,-4.094618464,2.69618613  
39\H,-1.2563160593,-5.5412664023,1.7518319964\C,-1.0294966418,-3.64953  
6278,0.6181607796\C,-1.7780111005,-3.171462922,-0.5827192622\C,-0.6946  
189782,-2.5700092813,-1.4646806801\H,-2.5827232125,-2.4625651684,-0.35  
33857961\H,-2.2305273207,-4.0134197886,-1.1318659929\C,0.9161149958,-2  
.6999434576,-0.4720943348\C,0.4852639425,-3.4452139558,-1.7097454599\H  
,0.3357825939,-4.5158539335,-1.5601613665\H,1.0414341543,-3.21986278,-  
2.6157844436\C,0.2752817762,-3.3616177636,0.6996232016\Au,-0.185131549  
9,-0.6061123086,-0.2324092041\H,-0.9558913507,-1.8725758751,-2.2599549  
672\C,2.2674262332,-2.0562003496,-0.4133447258\C,3.0490651877,-2.31545  
67746,0.7245604754\C,2.8759437801,-1.3066574188,-1.4361086819\C,4.3689  
067587,-1.8952634675,0.8229683377\H,2.6154413355,-2.8830001875,1.53980  
71188\C,4.1959296118,-0.881135332,-1.3457542022\C,4.9510561237,-1.1822  
872324,-0.2181012138\H,4.9413263151,-2.1347127303,1.7140227852\H,4.625  
1843643,-0.3094120734,-2.1616282709\H,5.9842044072,-0.8541616713,-0.15  
86623295\Br,1.929220136,-0.7530396607,-2.9865713522\C,-0.808717208,3.3  
125501831,1.2670886989\C,-2.0616917093,2.997483836,0.8579234466\H,-0.4  
117004264,4.2008055001,1.7330025184\H,-2.9855841962,3.5540145651,0.887  
1426455\C,-0.7343849498,1.2331363921,0.4131209675\N,-1.9965226627,1.72  
05710574,0.3399326507\N,-0.0086869114,2.222879721,0.9842460077\C,-3.12  
3902467,0.9923536313,-0.1759123129\C,-3.8943879946,0.2380042299,0.7247  
498292\C,-3.4072158187,1.0780460167,-1.548744668\C,-4.9679874798,-0.48  
25775014,0.1956748928\C,-4.4940459282,0.3379310334,-2.0210051378\C,-5.  
2618402986,-0.4392782948,-1.1621982798\H,-5.5888602894,-1.0777807197,0  
.8599012732\H,-4.74935597,0.3805430156,-3.076296505\H,-6.1053971111,-1  
.002719852,-1.5512973723\C,1.3930878325,2.1668496622,1.3061777177\C,2.  
307614792,2.7565065427,0.4170864752\C,1.7725274657,1.5742649236,2.5213  
322625\C,3.6566872843,2.713120658,0.7739694631\C,3.1363199009,1.553863  
1851,2.8211169931\C,4.0685882807,2.1133049394,1.9574735261\H,4.3955987  
518,3.1637788339,0.1179176674\H,3.4697867121,1.1058282375,3.7531516968  
\H,5.1239136103,2.0953414027,2.2153128333\C,-3.6157938204,0.1985111401  
,2.216659608\C,-3.2190414637,-1.2069312164,2.6776093123\C,-4.812049165

2,0.7250356877,3.016421161\H,-2.7669869511,0.8593518094,2.4261264344\H  
 ,-2.3183475887,-1.5532996139,2.1583246948\H,-3.0156233235,-1.208624337  
 1,3.754594501\H,-4.0211280665,-1.93046,2.4904877448\H,-5.0902934746,1.  
 7374185376,2.7047596395\H,-5.6922134794,0.0847448368,2.891565815\H,-4.  
 5715968929,0.7517842086,4.0848019236\C,-2.613476116,1.9535216941,-2.50  
 09719639\C,-3.4886439369,3.0811010831,-3.0598636251\C,-1.9808400494,1.  
 1386873844,-3.632345866\H,-1.7952770486,2.4193138661,-1.9397342269\H,-  
 3.9222830357,3.6889176757,-2.2585433979\H,-2.8953940377,3.73948897,-3.  
 7037984887\H,-4.3147630199,2.6846455379,-3.6607032874\H,-1.3041973007,  
 0.3727395333,-3.2370665215\H,-2.7400474865,0.6411594442,-4.2462101579\  
 H,-1.4006445689,1.7939369667,-4.291388583\C,1.8733893173,3.4758273538,  
 -0.8473425898\C,2.6986057506,3.0734367827,-2.0711198425\C,1.9275519349  
 ,4.9949891475,-0.640178213\H,0.8318128857,3.2027536733,-1.0556854225\H  
 ,2.6657493463,1.9928840489,-2.2399359482\H,2.3030740159,3.5688326755,-  
 2.9647250348\H,3.7472737541,3.375534238,-1.9732310051\H,1.3048231601,5  
 .3166299106,0.201740624\H,2.9529815899,5.3239145892,-0.4368347166\H,1.  
 5787235411,5.5167134568,-1.5381900486\C,0.7729241901,1.0070139604,3.51  
 24954331\C,0.8174766394,1.7732383543,4.8387998827\C,0.9886443851,-0.49  
 23042304,3.7334714621\H,-0.2336723453,1.1302742299,3.0971019583\H,0.63  
 91209601,2.8435489788,4.6902090926\H,0.0521079513,1.392534057,5.524136  
 2325\H,1.7891129151,1.6632864269,5.3330355716\H,0.9026579395,-1.041377  
 5813,2.7893721152\H,1.9784328267,-0.6969246197,4.1574426624\H,0.239697  
 0134,-0.8849210207,4.4309011284\\Version=ES64L-G09RevD.01\State=1-A\HF  
 =-4405.9131186\RMSD=6.499e-09\RMSF=1.847e-06\Dipole=-0.4580596,-0.0869  
 159,0.7379112\Quadrupole=10.7835977,1.3295794,-12.1131771,1.9403064,5.  
 5695061,-1.2486998\PG=C01 [X(C41H49Au1Br1N2)]\@

# IN18

1\1\GINC-A748\FOpt\RPBE1PBE\GenECP\C41H49Au1Br1N2(1+)\SIOC001\26-Jan-2  
 016\0\#p genecp pbelpbe opt\au\_ph\_br\_int5\_down\_ipr\1,1\C,-0.1254636  
 608,-0.0101577991,-0.0302130578\C,-0.3351441832,0.1619507888,1.5086307  
 368\H,0.9179568821,-0.02983465,-0.3599534133\H,-0.6794435257,0.7135058  
 45,-0.6350748424\H,-1.0209483377,0.9638706882,1.8118598009\H,0.5782641  
 309,0.2461541839,2.1096183612\C,-0.9634665267,-1.196853349,1.505497426  
 9\C,-1.5297595707,-2.1788115512,2.4312081502\C,-2.4127926401,-3.124000  
 6513,1.596549909\H,-2.0522846839,-1.6985484029,3.2663814229\H,-0.66067  
 0031,-2.7064591674,2.8853120258\C,-1.0103016088,-2.5979791481,-0.48762  
 47412\C,-1.5917086575,-3.6499673268,0.4053747532\H,-0.7166133245,-4.22  
 67623131,0.7739901111\H,-2.1706921249,-4.3631268641,-0.1884812317\C,-0  
 .7808822884,-1.3715305387,0.1447186637\Au,-4.2317115737,-2.2369114453,  
 1.0722592057\H,-2.649627558,-4.0016599963,2.2117258605\C,-0.6847067434  
 ,-2.7992609145,-1.8877094648\C,-0.7828947868,-1.6628789437,-2.72741397  
 52\C,-0.321787605,-4.0232545091,-2.505551939\C,-0.5768002819,-1.731539  
 4329,-4.0925174919\H,-1.081978772,-0.7200638527,-2.2848089863\C,-0.083

9342991,-4.0828140941,-3.8743544142\C,-0.2209836257,-2.9493791367,-4.6  
6829909\H,-0.6885861587,-0.8426092602,-4.7048888993\H,0.2151204286,-5.  
0271919639,-4.3156755192\H,-0.0419540176,-3.0228440844,-5.7369410701\B  
r,-0.0225005419,-5.6261170269,-1.5664906579\C,-8.2325993564,-1.1031546  
882,0.138340603\C,-7.774775019,0.0822235504,0.6101191897\H,-9.20440946  
61,-1.4000169285,-0.2247851072\H,-8.2630890743,1.0350343816,0.74464161  
48\C,-6.0585156219,-1.3874940145,0.6816679117\N,-6.4454127385,-0.11185  
1028,0.9352289298\N,-7.170750521,-1.9857264389,0.1899701608\C,-5.57975  
25429,0.9036556851,1.4663700847\C,-4.8862085316,1.7273042153,0.5650630  
172\C,-5.4662487025,1.0308017366,2.8599061472\C,-4.0311757048,2.691651  
3438,1.1035136866\C,-4.5977446594,2.0120798624,3.3446355892\C,-3.88421  
93369,2.8319249701,2.4789046565\H,-3.4827480255,3.3510039929,0.4357750  
187\H,-4.4874180614,2.1408691238,4.4180008552\H,-3.2237841693,3.597016  
7111,2.8785554546\C,-7.2380733542,-3.359927395,-0.2263938633\C,-7.5969  
708807,-4.3305615145,0.7219057528\C,-6.9460583849,-3.6677914827,-1.564  
7281124\C,-7.6449024921,-5.6580025028,0.2904607326\C,-7.0100309245,-5.  
0108985341,-1.9410666923\C,-7.3533399797,-5.9969613188,-1.0245059887\H  
, -7.9157054359,-6.4382394306,0.9965118387\H,-6.7889624062,-5.288482214  
9,-2.9682098802\H,-7.3993670514,-7.0360368916,-1.3386402522\C,-5.02727  
16736,1.5907254051,-0.9398624001\C,-3.7366448267,1.045169168,-1.559325  
9333\C,-5.4441718723,2.9089826229,-1.5976000815\H,-5.8170286808,0.8595  
537555,-1.1444530368\H,-3.473498326,0.0785983904,-1.1133551068\H,-3.85  
94055751,0.9077984037,-2.6401602539\H,-2.9039216616,1.742735733,-1.402  
3519869\H,-6.374195652,3.2944695948,-1.1669777613\H,-4.6772344518,3.68  
26566161,-1.4799358266\H,-5.6021860983,2.7630166837,-2.6718755134\C,-6  
.2437509687,0.1614907901,3.8302373675\C,-7.160828675,1.0055650285,4.72  
12927856\C,-5.3045160215,-0.7109450301,4.668196195\H,-6.8823630323,-0.  
5130551027,3.2490309846\H,-7.8536805713,1.6102139894,4.1262655329\H,-7  
.7522689925,0.3573979517,5.3771563728\H,-6.5878395781,1.6872350545,5.3  
5992683\H,-4.6896180642,-1.3515216493,4.0251659364\H,-4.6368433672,-0.  
0997649747,5.2869166258\H,-5.8821915051,-1.3556094368,5.3401337961\C,-  
6.5559427906,-2.6124211499,-2.5828773757\C,-7.4900274048,-2.6204377932  
, -3.7963211269\C,-5.0932580704,-2.7803183841,-3.0071047073\H,-6.645713  
2889,-1.6284122791,-2.1085702148\H,-8.5351460189,-2.4847402541,-3.4985  
907852\H,-7.2247569523,-1.8108078445,-4.4854015246\H,-7.4224723155,-3.  
5617527891,-4.3530344341\H,-4.4266331082,-2.7283485574,-2.1385013314\H  
, -4.9328687174,-3.7455996428,-3.5014792225\H,-4.8065485214,-1.99103620  
82,-3.7122572278\C,-7.9124969239,-3.9920868731,2.1669204722\C,-6.85094  
19255,-4.5718306355,3.1073842878\C,-9.3175350583,-4.4567060977,2.56151  
79606\H,-7.8857659336,-2.9019609829,2.2776231909\H,-5.8519838685,-4.20  
35920062,2.846194536\H,-7.063606468,-4.2872367697,4.1443634811\H,-6.83  
22776238,-5.6667095788,3.0588285913\H,-10.0819829656,-4.0315300992,1.9  
022742182\H,-9.4087200634,-5.5477152751,2.5177551622\H,-9.5437400374,-  
4.1487752697,3.5882667906\\Version=ES64L-G09RevD.01\State=1-A\HF=-4405

.929729\RMSD=4.359e-09\RMSF=1.055e-06\Dipole=1.7182416,1.2908227,-1.1071167\Quadrupole=11.3802489,-9.8305376,-1.5497113,2.5893481,-13.0022328,8.9235713\PG=C01 [X(C41H49Au1Br1N2)]\ \@

### TS17

1\1\GINC-A747\FTS\RPBE1PBE\GenECP\C41H49Au1Br1N2(1+)\SIOC001\30-Jan-2016\0\ \#p opt=(calcf,ts,noeigen) genecp pbe1pbe\ \au\_ph\_br\_int5\_down\_ipr\ \1,1\C,1.3298586241,-3.3960483895,-0.8485560744\C,0.4352862144,-3.0898715187,-1.9894088561\H,1.7530768168,-4.410617575,-0.8215236829\H,0.7975225685,-3.2530706115,0.1105955766\H,-0.5007090654,-3.5243848997,-2.3345985772\H,1.744914202,-2.937985969,-3.259827216\C,1.3499875156,-2.1217833503,-2.5598229171\C,1.1873813549,-0.8140387636,-3.292825701\C,1.4677096528,0.2917930824,-2.2508134608\H,0.1931872097,-0.7369840317,-3.7442832947\H,1.9266245399,-0.7682984678,-4.1091222318\C,2.8812523747,-1.2165505401,-0.7919222849\C,2.8571427341,0.0575802149,-1.6228003305\H,3.6402439966,-0.0033884332,-2.3993144025\H,3.1352941469,0.9102278113,-0.9976891362\C,2.1769673216,-2.2271792446,-1.3126950713\Au,-0.0928589778,0.3688472656,-0.8580232169\H,1.5085475637,1.2443941686,-2.7964387205\C,3.5294960318,-1.2552007044,0.5305023835\C,3.3944944293,-0.1456995787,1.3827664645\C,4.2920936904,-2.3348109074,1.0115888022\C,3.9684146065,-0.1094091136,2.6453093269\H,2.7972773773,0.6960698264,1.0451197983\C,4.8822597997,-2.3031789772,2.2722820878\C,4.7186807705,-1.192975177,3.0925606075\H,3.8340171904,0.7654416653,3.2745134378\H,5.4790428073,-3.1474493041,2.6001862183\H,5.1864502893,-1.1772439159,4.0724659596\Br,4.6403556986,-3.8802681246,-0.0309303433\C,-3.3341968037,1.3914979366,1.7183079685\C,-3.4278027379,0.0433525743,1.8120232638\H,-3.9242436375,2.1805100829,2.1584228962\H,-4.117336914,-0.5895192744,2.3488894168\C,-1.6789384735,0.5128948752,0.4539536513\N,-2.4077191427,-0.475578905,1.0350419917\N,-2.263125636,1.6565545218,0.8877572142\C,-2.1880200579,-1.8817583405,0.8539473297\C,-1.4362541114,-2.5751598434,1.8179367101\C,-2.7845218689,-2.5154672706,-0.2500147973\C,-1.2798210013,-3.9547850597,1.6404844883\C,-2.5864986255,-3.8949845819,-0.3835116047\C,-1.8467351187,-4.6091854245,0.5521319299\H,-0.7236224716,-4.526778633,2.3781808169\H,-3.0547961313,-4.4218697566,-1.2117218767\H,-1.7287055589,-5.6842868202,0.4449254197\C,-1.8415239766,2.9826268131,0.5209825452\C,-2.3561687855,3.5472873049,-0.6572287469\C,-0.9546406347,3.6620864399,1.3718292226\C,-1.9383167972,4.8397996667,-0.9812910169\C,-0.5778236889,4.9546999053,1.0026230868\C,-1.0596457934,5.5375237115,-0.1627241732\H,-2.3130360734,5.3082225945,-1.8871533851\H,0.1028262034,5.5137527711,1.6386130517\H,-0.7524744222,6.5442793364,-0.4316250226\C,-0.8531727396,-1.8960696266,3.043011525\C,0.6329281512,-2.2089415858,3.2301503457\C,-1.6518166038,-2.2775143282,4.295826772\H,-0.9435297038,-0.812827317,2.9049130959\H,1.2206491654,-1.9216505583,2.3520954428\H,1.0265804361,-1.6528126467,4.087595197\H,0.805465347,-3.272814125,3.4290288381\H

, -2.7106185155, -2.0141966453, 4.1994037761\H, -1.5931740724, -3.3549125003, 4.4886010705\H, -1.2522422303, -1.7579877253, 5.1734170556\C, -3.6657416461, -1.7790673683, -1.2417052281\C, -5.1092468254, -2.2903055783, -1.1706600243\C, -3.1184933519, -1.8657396543, -2.6684127261\H, -3.6768013269, -0.719320163, -0.9670901515\H, -5.5154566905, -2.2047175655, -0.1573228143\H, -5.74983522, -1.7099544051, -1.8434254838\H, -5.1791837656, -3.3420487804, -1.4703810423\H, -2.1124561322, -1.4338828761, -2.7261888905\H, -3.0830663157, -2.9020775063, -3.027343731\H, -3.7623877507, -1.3071523672, -3.3563347145\C, -0.4250054567, 3.0560781756, 2.6578042345\C, -1.012104884, 3.766961261, 3.8822484001\C, 1.105432293, 3.0677469245, 2.7003811462\H, -0.7419443698, 2.0075506268, 2.6985561943\H, -2.1068182426, 3.7260182237, 3.8865288637\H, -0.6514981658, 3.3017835794, 4.8065714442\H, -0.7200566443, 4.8229717597, 3.9032982213\H, 1.5265420657, 2.5736201613, 1.8181714772\H, 1.502958145, 4.0880435656, 2.734649154\H, 1.4619147455, 2.5460447681, 3.5960572142\C, -3.3355751835, 2.8224060295, -1.5612042384\C, -2.7385593698, 2.5851229663, -2.9517924763\C, -4.6681284851, 3.5734009799, -1.6518617317\H, -3.5427004636, 1.8389685824, -1.1234944105\H, -1.8058729458, 2.0128103759, -2.8871803403\H, -3.4447712066, 2.0280523601, -3.5785891768\H, -2.5198718795, 3.5309483253, -3.4603170661\H, -5.1129213691, 3.7240924956, -0.6623257216\H, -4.5421150173, 4.5589934747, -2.1135948532\H, -5.3812860002, 3.0104986268, -2.2641901725\\Version=ES64L-G09RevD.01\State=1-A\HF=-4405.8583217\RMSD=9.848e-09\RMSF=1.942e-06\Dipole=-1.2796749, -1.4710481, -0.0498568\Quadrupole=-7.2964916, 10.4275459, -3.1310542, -4.8404326, 4.7629158, 10.1185399\PG=C01[X(C41H49Au1Br1N2)]\@

## IN20

1\1\GINC-A733\FOpt\RPBE1PBE\GenECP\C41H49Au1Br1N2(1+)\ROOT\26-Jan-2016\0\#\#p opt genecp pbelpbe\\Title Card Required\\1,1\C,0.1986904152,-0.11546036,0.27716962\C,0.1362420612,-0.225338021,1.8292041677\H,1.1813570182,-0.1295272477,-0.2011731329\H,-0.3659036463,0.7529339096,-0.0826479277\H,-0.0349694259,0.6921495093,2.3981409468\H,1.0129346145,-0.7489005382,2.2212848551\C,-1.0766644912,-1.1922536124,1.66581918\C,-1.2046272031,-3.6786815229,1.7706220235\H,-0.9401074609,-2.4589108336,3.5104390833\C,-1.1643022916,-2.4725761241,2.4423730919\C,-0.5149452668,-2.5642809783,-0.3803230925\C,-1.1573101731,-3.7819037953,0.2589600209\H,-0.5832111243,-4.6790143763,0.0021225296\H,-2.1624722534,-3.9503530079,-0.1557079685\C,-0.5976353125,-1.3941675217,0.2519867922\Au,-3.3080791218,-3.2314483452,2.5063906292\H,-1.0148755343,-4.5949371809,2.3310743745\C,0.2215815471,-2.7343144425,-1.6542539026\C,-0.2827133031,-2.1765220384,-2.8355559051\C,1.4305485317,-3.4372721257,-1.7394976862\C,0.3801596315,-2.3234842544,-4.0492313291\H,-1.2164017606,-1.6229232612,-2.7853795618\C,2.1035595399,-3.5964253426,-2.9451962997\C,1.5716801283,-3.0400171435,-4.1045637916\H,-0.0337488837,-1.879616517,-4.9497613553\H,3.0412395501,-4.1412809776,-2.9700153734\H,2.0974200597,-3.16345118

89,-5.0467715002\H,-2.0083516508,-0.6118882871,1.7223505435\Br,2.22885  
09669,-4.150566511,-0.1741369544\C,-7.4958534828,-3.7080217854,2.53937  
51424\C,-7.2994209311,-3.454947496,3.8588747716\H,-8.3937056317,-3.915  
1481954,1.977825283\H,-7.990747024,-3.3924470833,4.6849973294\C,-5.307  
3575492,-2.9648845789,5.2861852004\C,-5.1740704888,-1.617616062,5.6593  
923241\C,-4.8574706453,-4.0337526131,6.0778809441\C,-4.5418798589,-1.3  
555648352,6.8765930466\C,-4.232628727,-3.7107314293,7.2843359876\C,-4.  
0735630479,-2.3883012859,7.679512409\H,-4.4194264303,-0.3263194936,7.2  
020673185\H,-3.869691616,-4.508959984,7.9257643897\H,-3.5875663689,-2.  
1609804493,8.6241200757\C,-6.0059521834,-3.8860083531,0.5383558162\C,-  
5.7283019616,-5.1949182094,0.1109073181\C,-6.0519824631,-2.7838198443,  
-0.3305638513\C,-5.4676131911,-5.3768638437,-1.2490935814\C,-5.7888595  
442,-3.0273944699,-1.6803995978\C,-5.4957940079,-4.3070284031,-2.13543  
07415\H,-5.2452681855,-6.3735585037,-1.6198442144\H,-5.8175354187,-2.2  
012013775,-2.3854104394\H,-5.2952471634,-4.4736078674,-3.1900628564\C,  
-5.698278761,-6.3827333654,1.0549029839\C,-4.2808595329,-6.9503133127,  
1.1812884165\C,-6.6906247284,-7.4683665398,0.6265571458\H,-6.002554515  
6,-6.0400317809,2.0508281561\H,-3.580152467,-6.186658726,1.5400383657\  
H,-4.2654642389,-7.7866626246,1.8890289123\H,-3.9120683039,-7.32106642  
21,0.218189953\H,-7.7086166998,-7.0731167233,0.5451438246\H,-6.4221435  
485,-7.9016121079,-0.3432237866\H,-6.6985833874,-8.2825626882,1.359244  
865\C,-6.3787010478,-1.3776911528,0.1364569205\C,-7.6905633696,-0.8818  
307102,-0.4813365993\C,-5.2295234342,-0.4089861768,-0.1576449323\H,-6.  
5157476634,-1.3979977117,1.2239089058\H,-8.5239876434,-1.553885294,-0.  
2501448908\H,-7.9396990381,0.11356383,-0.0977351854\H,-7.616088441,-0.  
8084469739,-1.5720288063\H,-4.296333667,-0.7482928452,0.3065817258\H,-  
5.0517458332,-0.3111735733,-1.2343983441\H,-5.4646589989,0.5882547277,  
0.2306880112\C,-5.6830380247,-0.4706548106,4.8059395772\C,-4.527899338  
1,0.4036885468,4.3078947528\C,-6.7236511135,0.3668613815,5.556417185\H  
, -6.1786588879,-0.8910697009,3.9229504029\H,-3.8040820186,-0.186162006  
1,3.7330432742\H,-4.906149914,1.2052669645,3.663478968\H,-3.9928438847  
,0.8713061304,5.1420521337\H,-7.5626522036,-0.2477283909,5.8994817388\  
H,-6.2885731006,0.8563516905,6.4346451699\H,-7.1207777874,1.151852555,  
4.903742798\C,-5.0236033978,-5.4873408346,5.675341265\C,-5.8435239745,  
-6.2647849109,6.7101915617\C,-3.6646630087,-6.1529732451,5.4359366722\  
H,-5.575812651,-5.5232285611,4.7289284029\H,-6.8247484427,-5.806335255  
1,6.8728658369\H,-6.0004763842,-7.2949771014,6.3725387568\H,-5.3318339  
554,-6.3092606718,7.6778477679\H,-3.0964138715,-5.6250437149,4.6609287  
306\H,-3.0587848109,-6.1633858779,6.3489254208\H,-3.799981681,-7.19150  
12064,5.1138269281\N,-6.255536402,-3.6635814553,1.9386648941\N,-5.9442  
331823,-3.2651078846,4.0295710207\C,-5.2964188768,-3.3912448063,2.8510  
459341\\Version=ES64L-G09RevD.01\State=1-A\HF=-4405.9730849\RMSE=3.920  
e-09\RMSF=2.618e-06\Dipole=-1.903119,0.3214317,0.5479719\Quadrupole=-0  
.5935226,-14.1439583,14.737481,4.2327479,-13.8512935,-0.1363563\PG=C01

[X(C41H49Au1Br1N2)]\ \@

# TS16

1\1\GINC-SHI\_03\FTS\RPBE1PBE\GenECP\C41H49Au1Br1N2(1+)\YIN\29-Jan-2016  
\0\#p opt=(calcf,ts,noeigen) genecp pbelpbe\Title Card Required\1,  
1\C,2.4000371211,-1.5146347778,-0.4962773106\C,2.2882258739,-1.0474551  
607,0.9676147996\H,1.4518001496,-1.8904109942,-0.875095764\H,3.2739015  
444,-2.0900520836,-0.7917010672\H,3.2082637878,-1.0136512164,1.5470285  
253\H,1.4255292264,-1.4350026203,1.4983630514\C,1.6407579327,0.5387406  
962,0.4635178042\C,2.335639028,1.7506934246,1.0843584819\C,3.655850507  
3,1.9034423824,0.3487305267\H,2.481481194,1.5835389405,2.1585413359\H,  
1.7113476986,2.6461025825,0.9903891303\C,3.8530292523,0.6706762484,-0.  
5356916773\C,3.5718537706,2.0559667464,-1.1237342442\H,2.6054350077,2.  
2367990287,-1.5902413622\H,4.4194168484,2.5033010646,-1.6343824397\C,2  
.5749342446,-0.0665004407,-0.4243465656\Au,-0.416752707,0.4162283991,0  
.3308456346\H,4.5185000345,2.3135529894,0.8633829369\C,5.1367072312,-0  
.0239524909,-0.8428043301\C,6.057450767,-0.4579295387,0.1198029887\C,5  
.4430543969,-0.2849518214,-2.1857193316\C,7.2331671868,-1.1118483452,-  
0.239212777\C,6.6061416204,-0.9461410508,-2.5587375489\H,4.7451312807,  
0.0549156702,-2.9472051255\C,7.5058546495,-1.358152885,-1.5798011692\H  
,7.9279905122,-1.4240761842,0.5329982295\H,6.813218355,-1.1304344631,-  
3.6084454002\H,8.4245400429,-1.8681673615,-1.8538029583\Br,5.772822825  
5,-0.1744289276,1.9739711122\C,-4.5168532619,-0.4937874135,-0.19102311  
86\C,-4.6339174537,0.8226311958,0.11417233\H,-5.2581834655,-1.24191787  
54,-0.425574371\H,-5.499013384,1.4615866187,0.2014183516\C,-2.44120113  
57,0.3114137167,0.1575821332\N,-3.3538343408,1.2963309531,0.3232881899  
\N,-3.167846294,-0.7868528827,-0.1590311482\C,-3.0334372954,2.65625899  
57,0.6664312808\C,-2.9681342153,3.0057634715,2.0245979946\C,-2.8061102  
465,3.5708623091,-0.3743798731\C,-2.6467466829,4.330871418,2.327158740  
7\C,-2.4894351578,4.8820503822,-0.0130275642\C,-2.4085901132,5.2592981  
17,1.3216645093\H,-2.5854701541,4.6395221852,3.3671616378\H,-2.3062497  
718,5.6194139793,-0.789760214\H,-2.1639717883,6.2858821043,1.579924640  
6\C,-2.5993230769,-2.0797052128,-0.4275047793\C,-2.2331430788,-2.38767  
6264,-1.747720749\C,-2.4322457045,-2.9724842461,0.6437018313\C,-1.6605  
279167,-3.6413714817,-1.9756662389\C,-1.8545304168,-4.2116469392,0.357  
6881897\C,-1.4696968184,-4.5432341092,-0.9358224771\H,-1.3686746291,-3  
.9168070358,-2.9855347867\H,-1.7090905848,-4.9299373079,1.1599487483\H  
, -1.0284363768,-5.5156921196,-1.1364578819\C,-2.8796046117,3.184755150  
8,-1.84009674\C,-1.4988049036,3.2728522405,-2.4981944787\C,-3.90852110  
65,4.0307423267,-2.596087489\H,-3.205536354,2.1401648938,-1.9043183557  
\H,-0.7768925687,2.6282359487,-1.9828707913\H,-1.5545103995,2.95871054  
91,-3.5467726154\H,-1.1135992127,4.2988349033,-2.4766618423\H,-4.90109  
05811,3.958997115,-2.1387988883\H,-3.6259985155,5.0891265339,-2.614215  
3286\H,-3.9871740637,3.6932957229,-3.6354106113\C,-3.2202118892,2.0128

272344,3.1436989897\C,-4.3809364334,2.4568290848,4.0394329331\C,-1.948  
1467626,1.7759614843,3.9641870971\H,-3.5025101991,1.0532340831,2.69520  
45789\H,-5.2987643335,2.6096058021,3.4617196666\H,-4.5816362422,1.6981  
190688,4.8037820777\H,-4.1537323436,3.394859282,4.5579912607\H,-1.1302  
334588,1.4168010944,3.3286752263\H,-1.6145390982,2.6969282968,4.455892  
8638\H,-2.1311485743,1.0289500292,4.7450426884\C,-2.4342171962,-1.4261  
028209,-2.9045433\C,-3.3478220924,-2.0266638688,-3.9776436839\C,-1.091  
322116,-0.9920618048,-3.5005589737\H,-2.9267632135,-0.5250557214,-2.52  
18656645\H,-4.3181016899,-2.3175571081,-3.561342741\H,-3.5247746766,-1  
.2983146427,-4.7765464172\H,-2.9013427374,-2.9168582407,-4.4344651654\  
H,-0.4607929083,-0.5137916875,-2.7415843415\H,-0.5433639156,-1.8477083  
052,-3.9121155044\H,-1.2490991678,-0.275587536,-4.3146510363\C,-2.8374  
376742,-2.6334845171,2.0664454762\C,-1.6070040353,-2.502642677,2.97003  
44158\C,-3.8307913472,-3.6534744946,2.6309983729\H,-3.3397171381,-1.65  
94321542,2.0568786567\H,-0.9309148578,-1.7222416147,2.5999466867\H,-1.  
9069521398,-2.2359835919,3.9896989219\H,-1.0493602318,-3.4450383173,3.  
0214249296\H,-4.7190572972,-3.7420108227,1.9967145126\H,-3.3826898569,  
-4.6493154065,2.7189315025\H,-4.1558910751,-3.3499248819,3.6320002501\  
\Version=EM64L-G09RevA.01\State=1-A\HF=-4405.9296991\RMSE=5.079e-09\RM  
SF=1.892e-06\Dipole=0.1684079,-0.4899627,-0.8219908\Quadrupole=26.5473  
199,-8.8650259,-17.682294,-8.197427,-10.6493851,4.0213111\PG=C01 [X(C4  
1H49Au1Br1N2)]\@

# IN19

1\1\GINC-A765\FOpt\RPBE1PBE\GenECP\C41H49Au1Br1N2(1+)\ROOT\26-Jan-2016  
\0\#p opt genecp pbelpbe\Title Card Required\1,1\C,-0.1341381823,-0  
.3919894646,-0.0252426894\C,-0.0839947939,-0.8131117807,1.4057755332\C  
,1.3435901618,-0.6595561032,1.8824172078\H,-0.4143099084,-1.8660578588  
,1.4259091977\H,-0.8338654446,-0.2740899982,2.0026971872\C,2.193435377  
9,-0.3023253292,0.6783422677\C,1.9670159769,0.7000434809,1.7810634048\  
H,1.3336314239,1.5612457988,1.5726021046\H,2.7982212672,0.9037232915,2  
.4503458664\Au,-1.842636789,-0.2497704094,-1.0715749139\H,1.7252974058  
,-1.3456559237,2.6317136286\C,3.5437647751,-0.8716758052,0.418070997\C  
,3.7504852632,-2.2297048781,0.1368725251\C,4.6697113792,-0.0402334001,  
0.4226899884\C,5.0178713777,-2.7401775229,-0.121902804\C,5.9440260835,  
-0.5333929441,0.1648570037\H,4.5307456403,1.0149665571,0.6445668385\C,  
6.1171404248,-1.8869153105,-0.1075374092\H,5.1399076853,-3.7985122552,  
-0.3263391214\H,6.7984186856,0.1364405217,0.1801477328\H,7.1070125545,  
-2.2872566193,-0.3054281653\C,1.1972486532,-0.1516596912,-0.4592112514  
\C,1.5574630749,-0.5016204837,-1.9380709066\C,1.4406331446,0.900565657  
6,-1.5940750968\H,2.5435041145,-0.9514840613,-2.0147853517\H,0.7678936  
568,-0.9789114517,-2.5079946299\H,0.5704112372,1.4609962613,-1.9202358  
418\H,2.3447092643,1.4755111923,-1.4105463964\Br,2.2915064788,-3.44058  
7702,0.1084541994\C,-5.7640971934,-0.1504729248,-2.7097523293\C,-5.061

4901432,0.2771700742,-3.7901783271\H,-6.8208137204,-0.3128987955,-2.56  
 37197775\H,-5.3788677643,0.5641645583,-4.7808051963\C,-3.591012208,-0.  
 1031955278,-2.128863747\N,-4.8467316653,-0.3770151648,-1.7057212956\N,  
 -3.7353485271,0.2983943733,-3.4137552027\C,-2.6429023754,0.6900964454,  
 -4.2636435093\C,-2.0165293777,-0.2966416061,-5.0421312913\C,-2.2532671  
 716,2.0393230515,-4.2703489174\C,-0.9414045106,0.1072039329,-5.8373050  
 08\C,-1.1717643478,2.3851798428,-5.0841629871\C,-0.5200311364,1.431114  
 7494,-5.8562824776\H,-0.4321137384,-0.6261713303,-6.4565419663\H,-0.84  
 00593989,3.4194560324,-5.1195432991\H,0.3153932674,1.7238357531,-6.486  
 2516927\C,-5.1796351417,-0.8433291329,-0.3851619352\C,-5.4662734039,0.  
 1087720227,0.6063328267\C,-5.2105167283,-2.2279378593,-0.1550580602\C,  
 -5.7801955251,-0.3726375416,1.8791517081\C,-5.5293910753,-2.6513354746  
 ,1.1370298441\C,-5.8098056713,-1.7361569222,2.1439466353\H,-6.00851962  
 85,0.3326281137,2.6735470593\H,-5.5626173419,-3.7151789122,1.355322144  
 3\H,-6.0598251315,-2.0883401584,3.1408242216\C,-5.4429593633,1.6035477  
 714,0.3461612607\C,-4.3350999645,2.2864749848,1.1543664178\C,-6.806623  
 6669,2.2426488554,0.6269907333\H,-5.2187504153,1.7656132931,-0.7145400  
 174\H,-3.3532630648,1.8611911947,0.9154688692\H,-4.3069139973,3.359426  
 5724,0.932976893\H,-4.499330489,2.1730354858,2.2320259315\H,-7.6001779  
 16,1.7718150942,0.0370114869\H,-7.081677371,2.1557758678,1.6839030263\  
 H,-6.7844215204,3.3092933616,0.3782739435\C,-4.9122408841,-3.251025808  
 6,-1.2356237226\C,-6.0976031771,-4.1962357674,-1.4554269986\C,-3.63379  
 55839,-4.0325576846,-0.9164971872\H,-4.7417781638,-2.7175119812,-2.177  
 9788974\H,-7.0107566328,-3.644798386,-1.7036487271\H,-5.8832253703,-4.  
 8882778209,-2.2771157938\H,-6.3038710829,-4.7976918829,-0.5632850335\H  
 ,-2.7750547505,-3.3595128217,-0.8093576629\H,-3.7361837586,-4.60052728  
 1,0.0151594525\H,-3.412294868,-4.7454949128,-1.7187304958\C,-2.9555209  
 959,3.1036783124,-3.4474100688\C,-3.5309356288,4.2090750399,-4.3386236  
 586\C,-2.0246564865,3.6861504896,-2.3792453709\H,-3.7972369583,2.63468  
 60754,-2.9248897342\H,-4.2136487863,3.8025299678,-5.0922142516\H,-4.08  
 49084837,4.9342810035,-3.7327553486\H,-2.740011438,4.7545043427,-4.865  
 1476469\H,-1.6609449203,2.9044480231,-1.7015008681\H,-1.1554995376,4.1  
 775302989,-2.8317214785\H,-2.5539446878,4.4349655671,-1.7793307352\C,-  
 2.463279406,-1.7470501334,-5.049969429\C,-1.3764756957,-2.6670446688,-  
 4.4856274526\C,-2.8892329803,-2.1914803474,-6.452943638\H,-3.339524593  
 ,-1.8416899407,-4.3982566008\H,-1.1130471641,-2.3847088808,-3.45943415  
 8\H,-1.725400233,-3.7056335564,-4.4714204929\H,-0.4656807439,-2.631442  
 4375,-5.0945696352\H,-3.6806829084,-1.5496879227,-6.8543485593\H,-2.04  
 98779533,-2.164706141,-7.1567006905\H,-3.2653139294,-3.2199912374,-6.4  
 266274735\\Version=ES64L-G09RevD.01\State=1-A\HF=-4405.9406827\RMSE=4.  
 149e-09\RMSF=2.981e-06\Dipole=-0.01195,0.907575,-0.4649546\Quadrupole=  
 28.7886802,-18.8868226,-9.9018576,1.2462033,4.9738861,-2.9600792\PG=C0  
 1 [X(C41H49Au1Br1N2)]\@

**TS18**

```
1\1\GINC-A727\FTS\RPBE1PBE\GenECP\C41H49Au1Br1N2(1+)\ROOT\29-Jan-2016\
0\|#p opt=(calcfc,ts,noeigen) genecp pbelpbe\Title Card Required\1,1
\C,1.684022359,0.1500950369,-0.648231353\H,2.1580596725,1.0566634371,0
.0311048773\C,2.360668737,1.1278580186,-1.404895983\C,3.6835994484,0.7
272179509,-1.8507993121\H,1.9375833706,2.1142374597,-1.5890400091\C,3.
9122896064,-0.6744070642,-1.2455468217\C,3.720037578,-0.5310850345,-2.
7105796604\H,2.7923664235,-0.8813732833,-3.1560025278\H,4.5933542493,-
0.5940657733,-3.3533107665\Au,-0.3143415455,0.169984646,-0.1534861378\
H,4.4806660664,1.4539183292,-1.9666895786\C,5.2348912666,-1.0510751896
,-0.6787354469\C,5.759810468,-0.441940232,0.4689119542\C,5.9898271391,
-2.0696233587,-1.2705407301\C,6.9848518438,-0.8222476474,1.0041002422\
C,7.2159778865,-2.464088513,-0.7468366435\H,5.5965625626,-2.5575048081
,-2.1587734919\C,7.7134449184,-1.8378487881,0.3917388194\H,7.364836837
5,-0.3233772994,1.889252682\H,7.7803722954,-3.2575984298,-1.2269278504
\H,8.6714642847,-2.1336218908,0.8087472126\C,2.6252385147,-1.004844279
2,-0.4951179571\C,2.6062864577,-1.8430922936,0.759359652\C,2.081167082
5,-2.4218789252,-0.5052848465\H,3.5682055114,-2.1920415531,1.123862906
2\H,1.9001279528,-1.5561481306,1.5330508179\H,1.0076540316,-2.54864786
69,-0.6173101664\H,2.6895263558,-3.1589685222,-1.0236663926\Br,4.81779
08467,0.9553875168,1.3388192691\C,-4.4301174604,0.788562403,0.65245147
53\C,-4.3848217054,-0.5623930906,0.7663049488\H,-5.2457200959,1.487457
0849,0.7553240009\H,-5.1529082425,-1.2870337382,0.9881790753\C,-2.3037
510982,0.1481848237,0.2814270127\N,-3.0752937233,-0.9340357963,0.53736
23382\N,-3.1477122923,1.2035760888,0.3545201837\C,-2.7577682746,2.5745
584929,0.1583130873\C,-2.3253501124,3.3105727811,1.2730664816\C,-2.835
6610494,3.113670153,-1.1359541372\C,-1.9418228443,4.6352224392,1.05227
56212\C,-2.4395241916,4.4431341167,-1.2975682241\C,-1.9952019388,5.196
1026395,-0.2176462994\H,-1.6011689004,5.2372779584,1.8901716862\H,-2.4
848073309,4.8958700161,-2.2841378472\H,-1.6964038068,6.2302138706,-0.3
65351958\C,-2.5879284143,-2.2866071795,0.5701991296\C,-2.5625092284,-3
.0174759371,-0.628541627\C,-2.1626010574,-2.8122740553,1.8010377413\C,
-2.0695156027,-4.3230979684,-0.5683190428\C,-1.6773049512,-4.121918605
4,1.8008568047\C,-1.6284654309,-4.8694147348,0.6306778776\H,-2.0371711
447,-4.9222686541,-1.4743166206\H,-1.3359109719,-4.5635589471,2.732977
0364\H,-1.2517156514,-5.8881746659,0.654976133\C,-3.0516581034,-2.4525
567561,-1.9492542396\C,-4.2548712117,-3.2414051351,-2.4761479323\C,-1.
925703158,-2.403431677,-2.9865377231\H,-3.3834302871,-1.4217764106,-1.
7804684558\H,-5.0731680404,-3.2585165856,-1.7484026589\H,-4.6308223382
,-2.7896078808,-3.4006962622\H,-3.9865505409,-4.2800539791,-2.69945983
9\H,-1.0799505342,-1.8073261046,-2.6239181171\H,-1.5564395341,-3.40750
84155,-3.2248314778\H,-2.2866530228,-1.953620888,-3.9183394651\C,-2.20
5727042,-2.018644904,3.0939423044\C,-0.7923431122,-1.7173691636,3.6023
541457\C,-3.0385054709,-2.7298520223,4.1648133233\H,-2.690473497,-1.05
```

65972671,2.8912237899\H,-0.2188538881,-1.1519590429,2.8585287176\H,-0.8357992554,-1.1237741232,4.5225469668\H,-0.2441390171,-2.6400055804,3.8256163243\H,-4.0536968034,-2.9388844446,3.8111186222\H,-2.5865665617,-3.6824781991,4.4626371434\H,-3.1120899692,-2.1062695619,5.0624288782\C,-3.3116038435,2.3113671969,-2.3325825101\C,-2.1608146063,2.0593330723,-3.3122654322\C,-4.4962322748,2.9840855486,-3.0327051854\H,-3.6566946067,1.3342433289,-1.9751841517\H,-1.3342284588,1.5333162398,-2.8200004115\H,-2.5020531952,1.4487806155,-4.156023114\H,-1.7720325406,3.0010810197,-3.7168022629\H,-5.3251619162,3.1610619248,-2.3392575843\H,-4.2139385171,3.9489455094,-3.4682475719\H,-4.8633313436,2.3507787327,-3.8476795445\C,-2.2598298558,2.7257984735,2.6717172265\C,-3.1261327032,3.5201214938,3.6541864374\C,-0.8113143781,2.632840426,3.1622519661\H,-2.6584781973,1.7053992046,2.6372793564\H,-4.1666950982,3.5770556249,3.3173263478\H,-3.1129888373,3.0442309409,4.6408271723\H,-2.7591678383,4.5449373886,3.7780473167\H,-0.2045094287,2.0206344835,2.4847987477\H,-0.3490111933,3.6244249568,3.2294239847\H,-0.7738884803,2.1794769528,4.1592815329\\Version=ES64L-G09RevD.01\State=1-A\HF=-4405.9145654\RMSD=3.005e-09\RMSF=1.986e-06\Dipole=0.3350855,-0.283764,-0.7788771\Quadrupole=27.6675606,-7.4316712,-20.2358893,-11.4848905,-8.3633738,0.0874871\PG=C01 [X(C41H49Au1Br1N2)]\\@

## IN21

1\1\GINC-SHI\_02\FOpt\RPBE1PBE\GenECP\C41H49Au1Br1N2(1+)\YIN\27-Jan-2016\0\#\#p opt genecp pbelpbe\\Title Card Required\\1,1\C,-0.1329956832,0.0556189675,0.655447173\C,0.2827461333,0.4367219495,1.9169027397\C,1.7672869377,0.5323307452,1.9806715569\H,-0.3301059856,0.3621658938,2.812674319\C,2.2834030619,0.0573461722,0.6186821676\C,2.481694102,1.4784251012,1.0449604707\H,1.9092569716,2.2666122368,0.5574992599\H,3.4847333439,1.769867883,1.3446471081\Au,-0.724612038,2.2514155944,0.9378944306\H,2.2603903511,0.2506242657,2.9055950727\C,3.4624260795,-0.8428527851,0.4787706433\C,3.4762645558,-2.1568924857,0.9666886996\C,4.6076782673,-0.3932389529,-0.1882361684\C,4.582599353,-2.9843468939,0.8052872434\C,5.7201961526,-1.2088248703,-0.3618812309\H,4.613942319,0.6232610937,-0.5741586282\C,5.7065719002,-2.50732881,0.1380794731\H,4.5602433482,-3.9934130274,1.2028301258\H,6.5940786677,-0.831694611,-0.8845127491\H,6.5694554474,-3.154909616,0.0138307502\C,1.0333820957,-0.2072816713,-0.2221303583\C,0.9474398914,-1.3511141006,-1.2099046076\C,1.0020180155,0.0470014984,-1.7156022486\H,1.8337447423,-1.9703001624,-1.3108615216\H,0.0084348034,-1.8946407077,-1.2654335786\H,0.1024990501,0.4868260267,-2.1383568866\H,1.9306028148,0.3936683657,-2.1620445536\H,-1.1307912487,-0.3081296778,0.4140934529\Br,1.976382838,-2.8628652653,1.8815868643\C,-1.7826903097,6.3061338752,0.4163868656\C,-3.0231084039,5.7556350783,0.461814303\H,-1.4588303464,7.32927615,0.3037145349\H,-4.0044315826,6.1994362683,0.3952637174\C,-1.5327262833,4.0900877797,0.6755965397\N

, -2.8482205195, 4.3977200562, 0.6224069638\N, -0.8835779303, 5.2689782105, 0.5467710595\C, -3.9159683987, 3.436803447, 0.7205222372\C, -4.3851311345, 2.8396045471, -0.4606685794\C, -4.4383141228, 3.1483205771, 1.991683247\C, -5.4112361257, 1.9008815155, -0.3334909734\C, -5.4624961236, 2.2011455063, 2.057303034\C, -5.9425073048, 1.5816950217, 0.9100174633\H, -5.8032239195, 1.4164583977, -1.2235892066\H, -5.893285382, 1.948931966, 3.0222178859\H, -6.742295469, 0.8503152305, 0.9847679085\C, 0.5478778732, 5.4203981071, 0.5479158685\C, 1.2179698091, 5.4173094459, -0.6865543359\C, 1.2027506659, 5.572143745, 1.7809496305\C, 2.60745266, 5.5557296071, -0.6557775053\C, 2.5927145813, 5.70686886, 1.7496646745\C, 3.2885273711, 5.6968009547, 0.5472348944\H, 3.1633201785, 5.5584710443, -1.5893665068\H, 3.1365279294, 5.8279581607, 2.6824201627\H, 4.3691719144, 5.8092188379, 0.5468532888\C, 0.4989222765, 5.2688206232, -2.0146299573\C, 0.8939666013, 3.9645541718, -2.7141523655\C, 0.7421059467, 6.4781342181, -2.9229896667\H, -0.5785653572, 5.2187568259, -1.8194835225\H, 0.6828365805, 3.0951567776, -2.0811691368\H, 0.3363614735, 3.8508410069, -3.6506615472\H, 1.9619315366, 3.9507424989, -2.9604228282\H, 0.444723717, 7.4132763938, -2.4367481091\H, 1.7983966849, 6.5677216945, -3.1993009507\H, 0.1664098368, 6.3777367634, -3.8494568083\C, 0.4684654319, 5.6050345123, 3.1082713511\C, 0.6428073702, 6.9591697319, 3.8040256823\C, 0.9124435386, 4.4567285713, 4.0199422036\H, -0.602229287, 5.4734540686, 2.9128841028\H, 0.3064068544, 7.784868824, 3.1679931293\H, 0.0623712137, 6.986436628, 4.7326538567\H, 1.6910823807, 7.1441636597, 4.0635214629\H, 0.7663977764, 3.4835543698, 3.5367791807\H, 1.9723697972, 4.5431224175, 4.2842331859\H, 0.3368238038, 4.467289787, 4.9522480682\C, -3.8308462882, 3.1757090169, -1.8327548307\C, -4.9192089587, 3.738904451, -2.7524045006\C, -3.1485832428, 1.95961408, -2.4673816187\H, -3.0672850931, 3.9536826104, -1.7163076557\H, -5.3961857639, 4.6227133287, -2.3157034961\H, -4.4889594435, 4.0259535733, -3.7180108246\H, -5.7035210508, 2.9991262189, -2.9466709741\H, -2.3401886134, 1.5830915965, -1.8290225792\H, -3.8594659298, 1.1413735452, -2.6286717461\H, -2.7214297157, 2.2266356547, -3.4405481624\C, -3.9346644644, 3.8113315685, 3.2604201082\C, -3.2396776477, 2.7955048632, 4.1728207274\C, -5.0610309709, 4.5384850743, 4.001653703\H, -3.1886456282, 4.5653365426, 2.9828525129\H, -2.4005760319, 2.3123944811, 3.6581203095\H, -2.8516783322, 3.2901538865, 5.0703534027\H, -3.9329971192, 2.0112250387, 4.4970562056\H, -5.5541413405, 5.2760839558, 3.3597226701\H, -5.8268968401, 3.8402562091, 4.3565456111\H, -4.6613084936, 5.0614120365, 4.8771613833\\Version=EM64L-G09RevA.01\State=1-A\HF=-4405.9605428\RMSD=9.070e-09\RMSF=1.735e-06\Dipole=-0.4545588, 1.5514469, -0.4801754\Quadrupole=17.9237655, 0.1013768, -18.0251422, -12.3428027, -4.546082, 1.9521265\PG=C01 [X(C41H49Au1Br1N2)]\\@

## 15. Reference

- [1] Vasu, D.; Das, A.; Liu, R.-S. *Chem. Commun.* **2010**, 46, 4115-4117.
- [2] (a) Buckman, B.; Nicholas, J. B.; Serebryany, V.; Seiwert, S. D. *PCT Int. Appl.* **2011**, WO2011075607 A1 20110623. (b) Stark, T.; Suhartono, M.; Goebel, M. W.; Lautens, M. *Synlett* **2013**, 24, 2730-2734. (c) Castanet, A.-S.; Colobert, F.; Broutin, P.-E. *Tetrahedron Lett.* **2002**, 43, 5047-5048.
- [3] Kozhushkov, S. I.; Wagner-Gillen, K.; Khlebnikov, A. F.; de Meijere, A. *Synthesis* **2010**, 3967-3973.
- [4] Piel, I.; Steinmetz, M.; Hirano, K.; Frohlich, R.; Grimme, S.; Glorius, F. *Angew. Chem., Int. Ed.* **2011**, 50, 4983-4987.
- [5] Ma, S.; He, Q. *Tetrahedron* **2006**, 62, 2769-2778.
- [6] Zheng, H.; Felix, R. J.; Gagné, M. R. *Org. Lett.* **2014**, 16, 2272-2275.
- [7] Deeter, G. A.; Venkataraman, D.; Kampf, J. W.; Moore, J. S. *Macromolecules* **1994**, 27, 2647.
